# Supplementary material for: Identification of pathogenic variant enriched regions across genes and gene families
Source: HighWire-hosted journal article supplement (doi:10.1101/gr.252601.119), 2019-12-23
Supplement: Supplemental_Table_S2.xlsx [file Supplemental_Table_S2.xlsx]

## Sheet: Legend
	Supplementary Table S2:
	Sheet 1)	Gene-summary for PERs detected in the family-wise (FW) approach
	Sheet 2)	Gene-summary for PERs detected in the gene-wise (GW) approach
	Sheet 3)	Genomic coordinates in BED format for all the PERs detected in the family-wise (FW) approach
	Sheet 4)	Genomic coordinates in BED format for all the PERs detected in the gene-wise (GW) approach
	Sheet 5)	Summary of genes with family-wise (FW) and gene-wise (GW) PERs.

## Sheet: 1) FW PERs summary
	Gene	Transcript	CCDS	Total.aa	Total.aa.in.pers	Per.%.of.gene	Number.of.pers	PERs	Approach	Family	Members	PERs in Gene-wise
	ACTN2	ENST00000366578.4	CCDS1613.1	894	9	0.0100671	1	PER1=9aa(111-119)	Family-wise	2459.para.1	ACTN1;ACTN4;ACTN2;ACTN3	YES
	ACVR1	ENST00000263640.3	CCDS2206.1	509	41	0.0805501	4	PER1=9aa(202-210),PER2=14aa(331-344),PER3=9aa(378-386),PER4=9aa(402-410)	Family-wise	661.para.1	ACVR2B;ACVR2A;TGFBR2;ACVR1B;TGFBR1;ACVR1C;BMPR1B;BMPR1A;ACVRL1;ACVR1;AMHR2	YES
	AFF4	ENST00000265343.5	CCDS4164.1	1163	9	0.00773861	1	PER1=9aa(252-260)	Family-wise	1253.para.1	AFF4;AFF1;AFF3;AFF2	YES
	APP	ENST00000346798.3	CCDS13576.1	770	23	0.0298701	2	PER1=9aa(686-694),PER2=14aa(709-722)	Family-wise	3536.para.1	APLP2;APP;APLP1	YES
	ATAD3A	ENST00000378755.5	CCDS31.1	634	9	0.0141956	1	PER1=9aa(46-54)	Family-wise	1489.para.1	ATAD3A;ATAD3B	YES
	ATP7A	ENST00000341514.6	CCDS35339.1	1500	23	0.0153333	2	PER1=14aa(993-1006),PER2=9aa(1043-1051)	Family-wise	2651.para.1	ATP7B;ATP7A	YES
	BCL11A	ENST00000335712.6	CCDS1862.1	835	9	0.0107784	1	PER1=9aa(46-54)	Family-wise	266.para.1	BCL11B;BCL11A	YES
	BRAF	ENST00000288602.6	CCDS5863.1	766	50	0.0652742	4	PER1=14aa(239-252),PER2=13aa(359-371),PER3=9aa(465-473),PER4=14aa(592-605)	Family-wise	1916.para.2	RAF1;ARAF;BRAF;KSR1	YES
	CACNA1E	ENST00000367573.2	CCDS55664.1	2313	23	0.0099438	2	PER1=9aa(186-194),PER2=14aa(695-708)	Family-wise	2614.para.1	CACNA1B;CACNA1A;CACNA1E	YES
	CCND2	ENST00000261254.3	CCDS8524.1	289	9	0.0311419	1	PER1=9aa(277-285)	Family-wise	660.para.1	CCND2;CCND3;CCND1	YES
	CHD3	ENST00000380358.4	CCDS32553.2	2059	9	0.00437105	1	PER1=9aa(1214-1222)	Family-wise	2417.para.1	CHD5;CHD4;CHD3	YES
	CHN1	ENST00000409900.3	CCDS46455.1	459	9	0.0196078	1	PER1=9aa(220-228)	Family-wise	34.para.3	CHN2;CHN1;ARHGAP15	YES
	CHRNB1	ENST00000306071.2	CCDS11106.1	501	42	0.0838323	3	PER1=9aa(259-267),PER2=24aa(278-301),PER3=9aa(303-311)	Family-wise	2424.para.1	CHRNA3;CHRNA6;CHRNA2;CHRNA4;CHRNB3;CHRNA5;CHRNB4;CHRNB2;CHRNA1;CHRNB1;CHRNE;CHRNG;CHRND	YES
	CNNM4	ENST00000377075.2	CCDS2024.2	775	18	0.0232258	2	PER1=9aa(196-204),PER2=9aa(494-502)	Family-wise	2302.para.1	CNNM4;CNNM2;CNNM3	YES
	COL10A1	ENST00000327673.4	CCDS5105.1	680	9	0.0132353	1	PER1=9aa(594-602)	Family-wise	1854.para.1	COL8A2;COL8A1;COL10A1	YES
	CREBBP	ENST00000262367.5	CCDS10509.1	2442	23	0.00941851	2	PER1=9aa(1446-1454),PER2=14aa(1861-1874)	Family-wise	3425.para.1	EP300;CREBBP	YES
	CSF1R	ENST00000286301.3	CCDS4302.1	972	111	0.114198	8	PER1=13aa(544-556),PER2=14aa(627-640),PER3=14aa(642-655),PER4=9aa(657-665),PER5=19aa(769-787),PER6=24aa(789-812),PER7=9aa(819-827),PER8=9aa(849-857)	Family-wise	683.para.3	CSF1R;KIT;PDGFRA;PDGFRB;FLT3	YES
	CTNNB1	ENST00000349496.5	CCDS2694.1	781	9	0.0115237	1	PER1=9aa(380-388)	Family-wise	1508.para.1	JUP;CTNNB1	YES
	DHX30	ENST00000445061.1	CCDS2759.1	1194	9	0.00753769	1	PER1=9aa(778-786)	Family-wise	1806.para.1	DHX57;DHX29;DHX30	YES
	DMD	ENST00000357033.4	CCDS14233.1	3685	23	0.00624152	2	PER1=9aa(50-58),PER2=14aa(160-173)	Family-wise	1876.para.1	DMD;UTRN	YES
	DNAJB6	ENST00000262177.4	CCDS5946.1	326	13	0.0398773	1	PER1=13aa(89-101)	Family-wise	2341.para.1	DNAJB4;DNAJB1;DNAJB13;DNAJB6;DNAJB7;DNAJB2	YES
	EPAS1	ENST00000263734.3	CCDS1825.1	870	16	0.0183908	1	PER1=16aa(532-547)	Family-wise	1782.para.3	SIM1;SIM2;NPAS3;HIF1A;EPAS1;HIF3A;NPAS2;CLOCK	YES
	EXT1	ENST00000378204.2	CCDS6324.1	746	9	0.0120643	1	PER1=9aa(335-343)	Family-wise	3048.para.1	EXT1;EXTL1;EXT2	YES
	FAM111B	ENST00000343597.3	CCDS7972.1	734	14	0.0190736	1	PER1=14aa(619-632)	Family-wise	1802.para.1	FAM111A;FAM111B	YES
	FAM126A	ENST00000432176.2	CCDS5377.1	521	9	0.0172745	1	PER1=9aa(51-59)	Family-wise	3018.para.1	FAM126A;FAM126B	YES
	FGFR3	ENST00000340107.4	CCDS54706.1	808	28	0.0346535	2	PER1=14aa(244-257),PER2=14aa(274-287)	Family-wise	683.para.2	FGFR1;FGFR2;FGFR3;FGFR4	YES
	FLI1	ENST00000527786.2	CCDS44768.1	452	14	0.0309735	1	PER1=14aa(332-345)	Family-wise	2476.para.2	FLI1;ERG	YES
	FLNA	ENST00000369850.3	CCDS48194.1	2647	81	0.0306007	4	PER1=14aa(121-134),PER2=34aa(186-219),PER3=19aa(221-239),PER4=14aa(251-264)	Family-wise	628.para.1	FLNC;FLNA;FLNB	YES
	FLNB	ENST00000490882.1	CCDS54599.1	2633	81	0.0307634	4	PER1=14aa(94-107),PER2=34aa(159-192),PER3=19aa(194-212),PER4=14aa(224-237)	Family-wise	628.para.1	FLNC;FLNA;FLNB	YES
	FLNC	ENST00000325888.8	CCDS43644.1	2725	81	0.0297248	4	PER1=14aa(114-127),PER2=34aa(179-212),PER3=19aa(214-232),PER4=14aa(244-257)	Family-wise	628.para.1	FLNC;FLNA;FLNB	YES
	FLT3	ENST00000241453.7	CCDS31953.1	993	112	0.11279	8	PER1=14aa(570-583),PER2=14aa(655-668),PER3=14aa(670-683),PER4=9aa(685-693),PER5=19aa(802-820),PER6=24aa(822-845),PER7=9aa(852-860),PER8=9aa(882-890)	Family-wise	683.para.3	CSF1R;KIT;PDGFRA;PDGFRB;FLT3	YES
	FLT4	ENST00000261937.6	CCDS4457.1	1363	41	0.0300807	4	PER1=9aa(1019-1027),PER2=14aa(1034-1047),PER3=9aa(1049-1057),PER4=9aa(1104-1112)	Family-wise	683.para.1	FLT1;KDR;FLT4	YES
	GABRB2	ENST00000274547.2	CCDS4355.1	512	75	0.146484	4	PER1=9aa(88-96),PER2=14aa(175-188),PER3=19aa(242-260),PER4=33aa(272-304)	Family-wise	3268.para.1	GABRB3;GABRB2;GABRB1;GABRQ;GABRP;GABRD;GABRR2;GABRR1;GABRR3;GLRA3;GLRA1;GLRA2;GLRA4;GLRB	YES
	GAN	ENST00000568107.2	CCDS10935.1	597	9	0.0150754	1	PER1=9aa(47-55)	Family-wise	3288.para.1	IPP;KLHL7;GAN;IVNS1ABP	YES
	GATA3	ENST00000379328.3	CCDS31143.1	444	37	0.0833333	3	PER1=9aa(280-288),PER2=14aa(315-328),PER3=14aa(335-348)	Family-wise	1713.para.1	GATA2;GATA3	YES
	GFAP	ENST00000586793.1	CCDS59296.1	438	47	0.107306	3	PER1=24aa(65-88),PER2=14aa(354-367),PER3=9aa(369-377)	Family-wise	116.para.2	VIM;DES;PRPH;GFAP;INA;NEFL	YES
	GLDN	ENST00000335449.6	CCDS10140.2	551	23	0.0417423	2	PER1=9aa(414-422),PER2=14aa(468-481)	Family-wise	1467.para.1	OLFM4;GLDN;OLFM1;OLFM3;OLFM2;MYOC	YES
	GLRA1	ENST00000455880.2	CCDS54942.1	457	75	0.164114	4	PER1=9aa(93-101),PER2=14aa(181-194),PER3=19aa(248-266),PER4=33aa(278-310)	Family-wise	3268.para.1	GABRB3;GABRB2;GABRB1;GABRQ;GABRP;GABRD;GABRR2;GABRR1;GABRR3;GLRA3;GLRA1;GLRA2;GLRA4;GLRB	YES
	GLUD1	ENST00000277865.4	CCDS7382.1	558	19	0.0340502	1	PER1=19aa(491-509)	Family-wise	2586.para.1	GLUD1;GLUD2	YES
	GNAI3	ENST00000369851.4	CCDS802.1	354	33	0.0932203	2	PER1=19aa(37-55),PER2=14aa(196-209)	Family-wise	2507.para.1	GNA11;GNAQ;GNA14;GNA15;GNAI1;GNAI3;GNAI2;GNAO1;GNAT2;GNAT1;GNAT3;GNAZ	YES
	GRIA4	ENST00000282499.5	CCDS8333.1	902	23	0.0254989	2	PER1=9aa(618-626),PER2=14aa(638-651)	Family-wise	147.para.1	GRIK4;GRIK5;GRIK2;GRIK3;GRIK1;GRIA4;GRIA2;GRIA3;GRIA1;GRID2;GRID1	YES
	GRIN2A	ENST00000396573.2	CCDS10539.1	1464	51	0.0348361	4	PER1=9aa(510-518),PER2=9aa(550-558),PER3=9aa(610-618),PER4=24aa(635-658)	Family-wise	1333.para.1	GRIN2B;GRIN2A;GRIN2D;GRIN2C	YES
	HECW2	ENST00000260983.3	CCDS33354.1	1572	9	0.00572519	1	PER1=9aa(1190-1198)	Family-wise	1758.para.2	HECW1;HECW2	YES
	HNRNPA1	ENST00000340913.6	CCDS44909.1	372	17	0.0456989	2	PER1=8aa(314-321),PER2=9aa(323-331)	Family-wise	1997.para.2	HNRNPA1L2;HNRNPA1;HNRNPA3;HNRNPA2B1;HNRNPA0	YES
	HOXA13	#N/A	CCDS5412.1	388	14	0.0360825	1	PER1=14aa(367-380)	Family-wise	1427.para.2	HOXA10;HOXD10;HOXC10;HOXB9;HOXC9;HOXA9;HOXC11;HOXD12;HOXC13;HOXA13;HOXB13;HOXD13	YES
	HOXB13	ENST00000290295.7	CCDS11536.1	284	14	0.0492958	1	PER1=14aa(261-274)	Family-wise	1427.para.2	HOXA10;HOXD10;HOXC10;HOXB9;HOXC9;HOXA9;HOXC11;HOXD12;HOXC13;HOXA13;HOXB13;HOXD13	YES
	IGSF10	ENST00000282466.3	CCDS3160.1	2623	9	0.00343119	1	PER1=9aa(154-162)	Family-wise	2135.para.1	MXRA5;IGSF10	YES
	ITGB3	ENST00000559488.1	CCDS11511.1	788	23	0.0291878	2	PER1=14aa(139-152),PER2=9aa(242-250)	Family-wise	320.para.1	ITGB7;ITGB2;ITGB1;ITGB5;ITGB3;ITGB6;ITGB8	YES
	ITPR1	ENST00000302640.8	CCDS54551.1	2743	18	0.00656216	2	PER1=9aa(274-282),PER2=9aa(2578-2586)	Family-wise	1004.para.2	ITPR1;ITPR2;ITPR3	YES
	KCNB1	ENST00000371741.4	CCDS13418.1	858	37	0.0431235	3	PER1=14aa(202-215),PER2=9aa(327-335),PER3=14aa(372-385)	Family-wise	1473.para.2	KCNB2;KCNB1	YES
	KCNQ3	ENST00000388996.4	CCDS34943.1	872	108	0.123853	6	PER1=23aa(225-247),PER2=9aa(274-282),PER3=39aa(299-337),PER4=19aa(339-357),PER5=9aa(364-372),PER6=9aa(374-382)	Family-wise	3052.para.1	KCNQ2;KCNQ3;KCNQ5	YES
	KIF1A	ENST00000498729.2	CCDS58757.1	1791	46	0.025684	4	PER1=9aa(96-104),PER2=9aa(211-219),PER3=14aa(246-259),PER4=14aa(266-279)	Family-wise	1288.para.3	KIF1B;KIF1A	YES
	KIF2A	ENST00000407818.3	CCDS47216.1	744	9	0.0120968	1	PER1=9aa(313-321)	Family-wise	2644.para.1	KIF2C;KIF2A;KIF2B	YES
	KIF5A	ENST00000455537.2	CCDS8945.1	1032	37	0.0358527	3	PER1=9aa(230-238),PER2=14aa(250-263),PER3=14aa(275-288)	Family-wise	3385.para.3	KIF5C;KIF5B;KIF5A	YES
	KLF1	ENST00000264834.4	CCDS12285.1	362	19	0.0524862	1	PER1=19aa(323-341)	Family-wise	2825.para.1	KLF2;KLF4;KLF1;KLF5;KLF3;KLF12;KLF8;KLF17	YES
	KRT1	ENST00000252244.3	CCDS8836.1	644	57	0.0885093	3	PER1=24aa(176-199),PER2=9aa(334-342),PER3=24aa(474-497)	Family-wise	3342.para.1	KRT3;KRT76;KRT4;KRT6C;KRT6B;KRT6A;KRT5;KRT75;KRT79;KRT1;KRT2;KRT7;KRT73;KRT71;KRT72;KRT74;KRT8;KRT77;KRT81;KRT83;KRT86;KRT85;KRT84;KRT82	YES
	KRT10	ENST00000269576.5	CCDS11377.1	584	48	0.0821918	2	PER1=24aa(146-169),PER2=24aa(435-458)	Family-wise	1898.para.1	KRT15;KRT13;KRT14;KRT16;KRT17;KRT19;KRT10;KRT12;KRT24;KRT27;KRT25;KRT28;KRT26;KRT33B;KRT31;KRT33A;KRT34;KRT35;KRT32;KRT36;KRT40;KRT38;KRT37;KRT39	YES
	KRT12	ENST00000251643.4	CCDS11378.1	494	48	0.097166	2	PER1=24aa(125-148),PER2=24aa(415-438)	Family-wise	1898.para.1	KRT15;KRT13;KRT14;KRT16;KRT17;KRT19;KRT10;KRT12;KRT24;KRT27;KRT25;KRT28;KRT26;KRT33B;KRT31;KRT33A;KRT34;KRT35;KRT32;KRT36;KRT40;KRT38;KRT37;KRT39	YES
	KRT13	ENST00000246635.3	CCDS11396.1	458	48	0.104803	2	PER1=24aa(104-127),PER2=24aa(391-414)	Family-wise	1898.para.1	KRT15;KRT13;KRT14;KRT16;KRT17;KRT19;KRT10;KRT12;KRT24;KRT27;KRT25;KRT28;KRT26;KRT33B;KRT31;KRT33A;KRT34;KRT35;KRT32;KRT36;KRT40;KRT38;KRT37;KRT39	YES
	KRT14	ENST00000167586.6	CCDS11400.1	472	48	0.101695	2	PER1=24aa(115-138),PER2=24aa(401-424)	Family-wise	1898.para.1	KRT15;KRT13;KRT14;KRT16;KRT17;KRT19;KRT10;KRT12;KRT24;KRT27;KRT25;KRT28;KRT26;KRT33B;KRT31;KRT33A;KRT34;KRT35;KRT32;KRT36;KRT40;KRT38;KRT37;KRT39	YES
	KRT16	ENST00000301653.4	CCDS11401.1	473	48	0.10148	2	PER1=24aa(117-140),PER2=24aa(403-426)	Family-wise	1898.para.1	KRT15;KRT13;KRT14;KRT16;KRT17;KRT19;KRT10;KRT12;KRT24;KRT27;KRT25;KRT28;KRT26;KRT33B;KRT31;KRT33A;KRT34;KRT35;KRT32;KRT36;KRT40;KRT38;KRT37;KRT39	YES
	KRT17	ENST00000311208.8	CCDS11402.1	432	48	0.111111	2	PER1=24aa(84-107),PER2=24aa(370-393)	Family-wise	1898.para.1	KRT15;KRT13;KRT14;KRT16;KRT17;KRT19;KRT10;KRT12;KRT24;KRT27;KRT25;KRT28;KRT26;KRT33B;KRT31;KRT33A;KRT34;KRT35;KRT32;KRT36;KRT40;KRT38;KRT37;KRT39	YES
	KRT2	ENST00000309680.3	CCDS8835.1	639	57	0.0892019	3	PER1=24aa(174-197),PER2=9aa(332-340),PER3=24aa(472-495)	Family-wise	3342.para.1	KRT3;KRT76;KRT4;KRT6C;KRT6B;KRT6A;KRT5;KRT75;KRT79;KRT1;KRT2;KRT7;KRT73;KRT71;KRT72;KRT74;KRT8;KRT77;KRT81;KRT83;KRT86;KRT85;KRT84;KRT82	YES
	KRT5	ENST00000252242.4	CCDS8830.1	590	57	0.0966102	3	PER1=24aa(164-187),PER2=9aa(322-330),PER3=24aa(462-485)	Family-wise	3342.para.1	KRT3;KRT76;KRT4;KRT6C;KRT6B;KRT6A;KRT5;KRT75;KRT79;KRT1;KRT2;KRT7;KRT73;KRT71;KRT72;KRT74;KRT8;KRT77;KRT81;KRT83;KRT86;KRT85;KRT84;KRT82	YES
	KRT6A	ENST00000330722.6	CCDS41786.1	564	57	0.101064	3	PER1=24aa(159-182),PER2=9aa(317-325),PER3=24aa(457-480)	Family-wise	3342.para.1	KRT3;KRT76;KRT4;KRT6C;KRT6B;KRT6A;KRT5;KRT75;KRT79;KRT1;KRT2;KRT7;KRT73;KRT71;KRT72;KRT74;KRT8;KRT77;KRT81;KRT83;KRT86;KRT85;KRT84;KRT82	YES
	KRT6C	ENST00000252250.6	CCDS8829.1	564	57	0.101064	3	PER1=24aa(159-182),PER2=9aa(317-325),PER3=24aa(457-480)	Family-wise	3342.para.1	KRT3;KRT76;KRT4;KRT6C;KRT6B;KRT6A;KRT5;KRT75;KRT79;KRT1;KRT2;KRT7;KRT73;KRT71;KRT72;KRT74;KRT8;KRT77;KRT81;KRT83;KRT86;KRT85;KRT84;KRT82	YES
	KRT86	ENST00000293525.5	CCDS41785.1	486	56	0.115226	3	PER1=24aa(102-125),PER2=9aa(258-266),PER3=23aa(398-420)	Family-wise	3342.para.1	KRT3;KRT76;KRT4;KRT6C;KRT6B;KRT6A;KRT5;KRT75;KRT79;KRT1;KRT2;KRT7;KRT73;KRT71;KRT72;KRT74;KRT8;KRT77;KRT81;KRT83;KRT86;KRT85;KRT84;KRT82	YES
	LMX1B	ENST00000355497.5	CCDS55343.1	406	14	0.0344828	1	PER1=14aa(260-273)	Family-wise	2349.para.2	LMX1B;LMX1A;ISL2;ISL1	YES
	MAFB	#N/A	CCDS13311.1	323	28	0.0866873	2	PER1=19aa(55-73),PER2=9aa(248-256)	Family-wise	1186.para.2	MAFB;MAF	YES
	MAP2K2	ENST00000262948.5	CCDS12120.1	400	9	0.0225	1	PER1=9aa(56-64)	Family-wise	2795.para.1	MAP2K1;MAP2K2	YES
	MED13	ENST00000397786.2	CCDS42366.1	2174	23	0.0105796	2	PER1=14aa(830-843),PER2=9aa(2056-2064)	Family-wise	716.para.1	MED13L;MED13	YES
	MED13L	ENST00000281928.3	CCDS9177.1	2210	20	0.00904977	2	PER1=14aa(861-874),PER2=6aa(2091-2096)	Family-wise	716.para.1	MED13L;MED13	YES
	MEF2C	ENST00000340208.5	CCDS54878.1	483	23	0.047619	2	PER1=14aa(16-29),PER2=9aa(31-39)	Family-wise	2166.para.1	MEF2A;MEF2C;MEF2D	YES
	MEIS2	ENST00000561208.1	CCDS10044.1	477	14	0.0293501	1	PER1=14aa(324-337)	Family-wise	473.para.1	PKNOX2;PKNOX1;MEIS1;MEIS2;MEIS3	YES
	MMP13	ENST00000260302.3	CCDS8324.1	471	9	0.0191083	1	PER1=9aa(67-75)	Family-wise	1753.para.1	MMP8;MMP1;MMP10;MMP3;MMP27;MMP12;MMP13;MMP20;MMP15;MMP14;MMP24;MMP16;MMP17;MMP25;MMP11	YES
	MYC	#N/A	CCDS6359.2	454	14	0.030837	1	PER1=14aa(66-79)	Family-wise	3571.para.1	MYC;MYCN	YES
	NEUROD2	ENST00000302584.4	CCDS11338.1	382	14	0.0366492	1	PER1=14aa(125-138)	Family-wise	928.para.1	NEUROD1;NEUROD4;NEUROD6;NEUROD2	YES
	NFKB2	ENST00000369966.3	CCDS41564.1	900	14	0.0155556	1	PER1=14aa(861-874)	Family-wise	2228.para.1	NFKB2;NFKB1	YES
	NKX2-5	ENST00000329198.4	CCDS4387.1	324	14	0.0432099	1	PER1=14aa(177-190)	Family-wise	891.para.1	NKX2-5;NKX2-3	YES
	NLRP3	ENST00000336119.3	CCDS1632.1	1036	23	0.0222008	2	PER1=14aa(300-313),PER2=9aa(566-574)	Family-wise	1951.para.1	NLRP9;NLRP4;NLRP14;NLRP12;NLRP3;NLRP13;NLRP5;NLRP2;NLRP7;NLRP8;NLRP11	YES
	NOD2	ENST00000300589.2	CCDS10746.1	1040	9	0.00865385	1	PER1=9aa(490-498)	Family-wise	3216.para.1	NOD1;NOD2	YES
	PACS2	ENST00000458164.2	CCDS45178.2	904	9	0.00995575	1	PER1=9aa(207-215)	Family-wise	3118.para.1	PACS1;PACS2	YES
	PAX3	ENST00000392069.2	CCDS2448.1	505	32	0.0633663	3	PER1=9aa(56-64),PER2=14aa(76-89),PER3=9aa(264-272)	Family-wise	1391.para.2	PAX3;PAX7	YES
	PAX6	ENST00000419022.1	CCDS31452.1	436	53	0.12156	2	PER1=44aa(4-47),PER2=9aa(64-72)	Family-wise	1391.para.1	PAX2;PAX5;PAX8;PAX9;PAX6;PAX4	YES
	PAX8	ENST00000429538.3	CCDS46398.1	450	53	0.117778	2	PER1=44aa(9-52),PER2=9aa(55-63)	Family-wise	1391.para.1	PAX2;PAX5;PAX8;PAX9;PAX6;PAX4	YES
	PAX9	ENST00000361487.6	CCDS9662.1	341	53	0.155425	2	PER1=44aa(4-47),PER2=9aa(50-58)	Family-wise	1391.para.1	PAX2;PAX5;PAX8;PAX9;PAX6;PAX4	YES
	PDE3A	ENST00000359062.3	CCDS31754.1	1141	14	0.0122699	1	PER1=14aa(441-454)	Family-wise	2861.para.1	PDE3B;PDE3A	YES
	PDE4D	ENST00000340635.6	CCDS47213.1	809	42	0.0519159	3	PER1=14aa(221-234),PER2=14aa(296-309),PER3=14aa(326-339)	Family-wise	1499.para.2	PDE4B;PDE4D;PDE4A;PDE4C	YES
	PDGFRA	ENST00000257290.5	CCDS3495.1	1089	112	0.102847	8	PER1=14aa(553-566),PER2=14aa(638-651),PER3=14aa(653-666),PER4=9aa(668-676),PER5=19aa(809-827),PER6=24aa(829-852),PER7=9aa(859-867),PER8=9aa(889-897)	Family-wise	683.para.3	CSF1R;KIT;PDGFRA;PDGFRB;FLT3	YES
	PDYN	ENST00000217305.2	CCDS13023.1	254	8	0.0314961	1	PER1=8aa(211-218)	Family-wise	508.para.1	PENK;PDYN	YES
	PHKA2	ENST00000379942.4	CCDS14190.1	1235	14	0.011336	1	PER1=14aa(126-139)	Family-wise	3514.para.1	PHKA1;PHKA2;PHKB	YES
	PPP2R1A	ENST00000322088.6	CCDS12849.1	589	9	0.0152801	1	PER1=9aa(179-187)	Family-wise	877.para.1	PPP2R1A;PPP2R1B	YES
	PPP2R5D	ENST00000485511.1	CCDS4878.1	602	14	0.0232558	1	PER1=14aa(193-206)	Family-wise	2075.para.1	PPP2R5E;PPP2R5A;PPP2R5B;PPP2R5C;PPP2R5D	YES
	PTDSS1	ENST00000517309.1	CCDS6271.1	473	9	0.0190275	1	PER1=9aa(258-266)	Family-wise	209.para.1	PTDSS2;PTDSS1	YES
	RAC3	ENST00000306897.4	CCDS11798.1	192	14	0.0729167	1	PER1=14aa(55-68)	Family-wise	2241.para.1	RHOU;RHOV;RAC3;RAC1;RAC2;RHOG;CDC42;RHOJ;RHOQ;RHOH	YES
	RAF1	ENST00000251849.4	CCDS2612.1	648	51	0.0787037	4	PER1=14aa(143-156),PER2=14aa(253-266),PER3=9aa(357-365),PER4=14aa(484-497)	Family-wise	1916.para.2	RAF1;ARAF;BRAF;KSR1	YES
	RAX	ENST00000334889.3	CCDS11972.1	346	14	0.0404624	1	PER1=14aa(179-192)	Family-wise	92.para.2	ALX3;ALX1;RAX;SHOX2;OTP	YES
	RBPJ	ENST00000342295.1	CCDS3437.1	500	9	0.018	1	PER1=9aa(60-68)	Family-wise	582.para.1	RBPJ;RBPJL	YES
	RHBDF2	ENST00000313080.4	CCDS32743.1	856	13	0.0151869	1	PER1=13aa(183-195)	Family-wise	1431.para.1	RHBDF1;RHBDF2	YES
	RNF13	ENST00000344229.3	CCDS3146.1	381	9	0.023622	1	PER1=9aa(307-315)	Family-wise	1716.para.1	RNF150;RNF130;RNF149;RNF128;RNF133;RNF13;RNF167	YES
	RP1L1	#N/A	CCDS43708.1	2400	9	0.00375	1	PER1=9aa(1193-1201)	Family-wise	2702.para.1	RP1L1;RP1	YES
	RUNX1	ENST00000300305.3	CCDS13639.1	480	47	0.0979167	3	PER1=14aa(99-112),PER2=19aa(159-177),PER3=14aa(194-207)	Family-wise	2874.para.1	RUNX2;RUNX1	YES
	RUNX2	ENST00000371438.1	CCDS43467.2	521	47	0.0902111	3	PER1=14aa(123-136),PER2=19aa(183-201),PER3=14aa(218-231)	Family-wise	2874.para.1	RUNX2;RUNX1	YES
	RYR1	ENST00000359596.3	CCDS33011.1	5038	69	0.0136959	6	PER1=9aa(151-159),PER2=14aa(2338-2351),PER3=9aa(2433-2441),PER4=9aa(4808-4816),PER5=14aa(4888-4901),PER6=14aa(4933-4946)	Family-wise	1004.para.1	RYR3;RYR2;RYR1	YES
	SATB2	ENST00000417098.1	CCDS2327.1	733	14	0.0190996	1	PER1=14aa(383-396)	Family-wise	619.para.1	SATB2;SATB1	YES
	SCNN1B	ENST00000343070.2	CCDS10609.1	640	9	0.0140625	1	PER1=9aa(616-624)	Family-wise	2562.para.1	SCNN1G;SCNN1B;SCNN1A;SCNN1D	YES
	SLC4A1	ENST00000262418.6	CCDS11481.1	911	9	0.00987925	1	PER1=9aa(755-763)	Family-wise	2483.para.2	SLC4A4;SLC4A5;SLC4A10;SLC4A8;SLC4A7;SLC4A9;SLC4A1	YES
	SLFN14	#N/A	CCDS45650.1	912	14	0.0153509	1	PER1=14aa(212-225)	Family-wise	726.para.1	SLFN11;SLFN13;SLFN5;SLFN14	YES
	SMARCA2	ENST00000382203.1	CCDS34977.1	1590	64	0.0402516	6	PER1=9aa(750-758),PER2=9aa(780-788),PER3=9aa(850-858),PER4=9aa(945-953),PER5=9aa(1125-1133),PER6=19aa(1145-1163)	Family-wise	2770.para.1	SMARCA2;SMARCA4	YES
	SMARCC2	ENST00000267064.4	CCDS8907.1	1214	9	0.00741351	1	PER1=9aa(605-613)	Family-wise	3368.para.1	SMARCC2;SMARCC1	YES
	SNRNP200	ENST00000323853.5	CCDS2020.1	2136	9	0.00421348	1	PER1=9aa(679-687)	Family-wise	535.para.1	ASCC3;SNRNP200	YES
	SNRPA	ENST00000243563.3	CCDS12565.1	282	14	0.0496454	1	PER1=14aa(26-39)	Family-wise	1551.para.1	SNRPB2;SNRPA	YES
	SOX10	ENST00000396884.2	CCDS13964.1	466	71	0.152361	3	PER1=23aa(101-123),PER2=14aa(130-143),PER3=34aa(145-178)	Family-wise	2099.para.1	SOX7;SOX17;SOX10;SOX9;SOX8;SOX11;SOX4;SOX1	YES
	SOX9	ENST00000245479.2	CCDS11689.1	509	71	0.139489	3	PER1=23aa(102-124),PER2=14aa(131-144),PER3=34aa(146-179)	Family-wise	2099.para.1	SOX7;SOX17;SOX10;SOX9;SOX8;SOX11;SOX4;SOX1	YES
	SPAST	ENST00000315285.3	CCDS1778.1	616	55	0.0892857	5	PER1=14aa(358-371),PER2=14aa(378-391),PER3=9aa(421-429),PER4=9aa(459-467),PER5=9aa(484-492)	Family-wise	1762.para.1	FIGNL1;FIGN;SPAST;IQCA1;IQCA1L	YES
	SPECC1L	ENST00000314328.9	CCDS33619.1	1117	9	0.0080573	1	PER1=9aa(412-420)	Family-wise	1327.para.2	SPECC1;SPECC1L;SMTN	YES
	SPTA1	ENST00000368147.4	CCDS41423.1	2419	18	0.00744109	2	PER1=9aa(44-52),PER2=9aa(2165-2173)	Family-wise	2459.para.2	SPTA1;SPTAN1;SPTBN1;SPTBN2;SPTB;SPTBN4	YES
	SPTLC2	ENST00000216484.2	CCDS9865.1	562	9	0.0160142	1	PER1=9aa(378-386)	Family-wise	1958.para.1	SPTLC3;SPTLC2	YES
	SYT1	ENST00000261205.4	CCDS9017.1	422	14	0.0331754	1	PER1=14aa(361-374)	Family-wise	2676.para.1	SYT1;SYT2;SYT5;SYT8	YES
	SYT2	ENST00000367267.1	CCDS1427.1	419	14	0.0334129	1	PER1=14aa(358-371)	Family-wise	2676.para.1	SYT1;SYT2;SYT5;SYT8	YES
	TBL1X	ENST00000217964.7	CCDS14133.1	577	14	0.0242634	1	PER1=14aa(385-398)	Family-wise	1232.para.1	TBL1X;TBL1Y;TBL1XR1	YES
	TGFBI	ENST00000442011.2	CCDS47266.1	683	32	0.0468521	3	PER1=9aa(515-523),PER2=9aa(540-548),PER3=14aa(618-631)	Family-wise	434.para.1	POSTN;TGFBI	YES
	TGM2	ENST00000361475.2	CCDS13302.1	687	27	0.0393013	3	PER1=9aa(176-184),PER2=9aa(281-289),PER3=9aa(330-338)	Family-wise	1294.para.1	TGM1;F13A1;TGM4;TGM7;TGM5;TGM6;TGM3;TGM2;EPB42	YES
	THRB	ENST00000396671.2	CCDS2641.1	461	72	0.156182	4	PER1=14aa(269-282),PER2=19aa(304-322),PER3=30aa(324-353),PER4=9aa(453-461)	Family-wise	2681.para.1	NR1H3;NR1H2;NR1H4;RARB;RARA;RARG;THRB;NR1D2;NR1D1;PPARA;PPARD;PPARG;NR1I2;VDR;RORA	YES
	TNNI2	ENST00000381906.1	CCDS31333.1	182	14	0.0769231	1	PER1=14aa(159-172)	Family-wise	861.para.1	TNNI1;TNNI3;TNNI2	YES
	TP63	ENST00000264731.3	CCDS3293.1	680	23	0.0338235	2	PER1=9aa(304-312),PER2=14aa(344-357)	Family-wise	664.para.1	TP63;TP73	YES
	UBR1	ENST00000290650.4	CCDS10091.1	1749	9	0.0051458	1	PER1=9aa(1424-1432)	Family-wise	798.para.1	UBR1;UBR2;UBR3	YES
	VAMP2	ENST00000316509.6	CCDS32561.1	116	9	0.0775862	1	PER1=9aa(74-82)	Family-wise	1582.para.1	VAMP1;VAMP2;VAMP3;VAMP4;VAMP8	YES
	YWHAG	ENST00000307630.3	CCDS5584.1	247	9	0.0364372	1	PER1=9aa(125-133)	Family-wise	1338.para.1	YWHAZ;YWHAB;YWHAQ;YWHAG;YWHAH;SFN;YWHAE	YES
	ZMIZ1	ENST00000334512.5	CCDS7357.1	1067	9	0.00843486	1	PER1=9aa(295-303)	Family-wise	3077.para.1	ZMIZ1;ZMIZ2	YES
	ZSWIM6	ENST00000252744.5	CCDS47215.1	1215	14	0.0115226	1	PER1=14aa(1156-1169)	Family-wise	2265.para.1	ZSWIM4;ZSWIM6;ZSWIM5	YES
	ABCC1	ENST00000399410.3	CCDS42122.1	1531	9	0.00587851	1	PER1=9aa(1367-1375)	Family-wise	2390.para.1	ABCC3;ABCC1;ABCC2;ABCC6;ABCC4;ABCC11;ABCC12;ABCC5;ABCC10;CFTR	NO
	ABCC10	ENST00000372530.4	CCDS56430.1	1492	9	0.00603217	1	PER1=9aa(1320-1328)	Family-wise	2390.para.1	ABCC3;ABCC1;ABCC2;ABCC6;ABCC4;ABCC11;ABCC12;ABCC5;ABCC10;CFTR	NO
	ABCC11	ENST00000394747.1	CCDS10732.1	1382	9	0.0065123	1	PER1=9aa(1215-1223)	Family-wise	2390.para.1	ABCC3;ABCC1;ABCC2;ABCC6;ABCC4;ABCC11;ABCC12;ABCC5;ABCC10;CFTR	NO
	ABCC12	ENST00000311303.3	CCDS10730.1	1359	9	0.00662252	1	PER1=9aa(1194-1202)	Family-wise	2390.para.1	ABCC3;ABCC1;ABCC2;ABCC6;ABCC4;ABCC11;ABCC12;ABCC5;ABCC10;CFTR	NO
	ABCC2	ENST00000370449.4	CCDS7484.1	1545	9	0.00582524	1	PER1=9aa(1374-1382)	Family-wise	2390.para.1	ABCC3;ABCC1;ABCC2;ABCC6;ABCC4;ABCC11;ABCC12;ABCC5;ABCC10;CFTR	NO
	ABCC3	ENST00000285238.8	CCDS32681.1	1527	9	0.00589391	1	PER1=9aa(1363-1371)	Family-wise	2390.para.1	ABCC3;ABCC1;ABCC2;ABCC6;ABCC4;ABCC11;ABCC12;ABCC5;ABCC10;CFTR	NO
	ABCC4	ENST00000376887.4	CCDS9474.1	1325	9	0.00679245	1	PER1=9aa(1114-1122)	Family-wise	2390.para.1	ABCC3;ABCC1;ABCC2;ABCC6;ABCC4;ABCC11;ABCC12;ABCC5;ABCC10;CFTR	NO
	ABCC5	ENST00000334444.6	CCDS43176.1	1437	9	0.00626305	1	PER1=9aa(1267-1275)	Family-wise	2390.para.1	ABCC3;ABCC1;ABCC2;ABCC6;ABCC4;ABCC11;ABCC12;ABCC5;ABCC10;CFTR	NO
	ABCC6	ENST00000205557.7	CCDS10568.1	1503	9	0.00598802	1	PER1=9aa(1339-1347)	Family-wise	2390.para.1	ABCC3;ABCC1;ABCC2;ABCC6;ABCC4;ABCC11;ABCC12;ABCC5;ABCC10;CFTR	NO
	ACTN1	ENST00000394419.4	CCDS45130.1	914	9	0.00984683	1	PER1=9aa(104-112)	Family-wise	2459.para.1	ACTN1;ACTN4;ACTN2;ACTN3	NO
	ACTN3	#N/A	CCDS76439.1	944	9	0.0095339	1	PER1=9aa(161-169)	Family-wise	2459.para.1	ACTN1;ACTN4;ACTN2;ACTN3	NO
	ACTN4	ENST00000252699.2	CCDS12518.1	911	9	0.00987925	1	PER1=9aa(123-131)	Family-wise	2459.para.1	ACTN1;ACTN4;ACTN2;ACTN3	NO
	ACVR1B	ENST00000541224.1	CCDS44894.2	546	41	0.0750916	4	PER1=9aa(201-209),PER2=14aa(371-384),PER3=9aa(418-426),PER4=9aa(442-450)	Family-wise	661.para.1	ACVR2B;ACVR2A;TGFBR2;ACVR1B;TGFBR1;ACVR1C;BMPR1B;BMPR1A;ACVRL1;ACVR1;AMHR2	NO
	ACVR1C	ENST00000243349.8	CCDS2205.1	493	41	0.0831643	4	PER1=9aa(189-197),PER2=14aa(318-331),PER3=9aa(365-373),PER4=9aa(389-397)	Family-wise	661.para.1	ACVR2B;ACVR2A;TGFBR2;ACVR1B;TGFBR1;ACVR1C;BMPR1B;BMPR1A;ACVRL1;ACVR1;AMHR2	NO
	ACVR2A	ENST00000241416.7	CCDS33301.1	513	38	0.0740741	4	PER1=6aa(189-194),PER2=14aa(317-330),PER3=9aa(362-370),PER4=9aa(385-393)	Family-wise	661.para.1	ACVR2B;ACVR2A;TGFBR2;ACVR1B;TGFBR1;ACVR1C;BMPR1B;BMPR1A;ACVRL1;ACVR1;AMHR2	NO
	ACVR2B	ENST00000352511.4	CCDS2679.1	512	38	0.0742188	4	PER1=6aa(187-192),PER2=14aa(316-329),PER3=9aa(361-369),PER4=9aa(384-392)	Family-wise	661.para.1	ACVR2B;ACVR2A;TGFBR2;ACVR1B;TGFBR1;ACVR1C;BMPR1B;BMPR1A;ACVRL1;ACVR1;AMHR2	NO
	ACVRL1	ENST00000388922.4	CCDS31804.1	503	41	0.0815109	4	PER1=9aa(196-204),PER2=14aa(325-338),PER3=9aa(372-380),PER4=9aa(396-404)	Family-wise	661.para.1	ACVR2B;ACVR2A;TGFBR2;ACVR1B;TGFBR1;ACVR1C;BMPR1B;BMPR1A;ACVRL1;ACVR1;AMHR2	NO
	AFF1	ENST00000395146.4	CCDS54775.1	1218	9	0.00738916	1	PER1=9aa(296-304)	Family-wise	1253.para.1	AFF4;AFF1;AFF3;AFF2	NO
	AFF2	ENST00000370460.2	CCDS14684.1	1311	9	0.00686499	1	PER1=9aa(284-292)	Family-wise	1253.para.1	AFF4;AFF1;AFF3;AFF2	NO
	AFF3	ENST00000356421.2	CCDS33258.1	1251	9	0.00719424	1	PER1=9aa(255-263)	Family-wise	1253.para.1	AFF4;AFF1;AFF3;AFF2	NO
	ALX1	ENST00000316824.3	CCDS9028.1	326	14	0.0429448	1	PER1=14aa(175-188)	Family-wise	92.para.2	ALX3;ALX1;RAX;SHOX2;OTP	NO
	ALX3	ENST00000369792.4	CCDS819.1	343	14	0.0408163	1	PER1=14aa(196-209)	Family-wise	92.para.2	ALX3;ALX1;RAX;SHOX2;OTP	NO
	AMHR2	ENST00000257863.4	CCDS8858.1	573	41	0.0715532	4	PER1=9aa(197-205),PER2=14aa(328-341),PER3=9aa(383-391),PER4=9aa(408-416)	Family-wise	661.para.1	ACVR2B;ACVR2A;TGFBR2;ACVR1B;TGFBR1;ACVR1C;BMPR1B;BMPR1A;ACVRL1;ACVR1;AMHR2	NO
	ANKK1	ENST00000303941.3	CCDS44734.1	765	9	0.0117647	1	PER1=9aa(185-193)	Family-wise	2703.para.2	ANKK1;RIPK4	NO
	ANTXR1	ENST00000303714.4	CCDS1892.1	564	14	0.0248227	1	PER1=14aa(377-390)	Family-wise	2324.para.1	ANTXR1;ANTXR2;ANTXRL	NO
	ANTXR2	ENST00000307333.7	CCDS47086.1	489	14	0.0286299	1	PER1=14aa(375-388)	Family-wise	2324.para.1	ANTXR1;ANTXR2;ANTXRL	NO
	ANTXRL	ENST00000447511.2	CCDS60524.1	631	14	0.022187	1	PER1=14aa(425-438)	Family-wise	2324.para.1	ANTXR1;ANTXR2;ANTXRL	NO
	ANXA11	ENST00000438331.1	CCDS7364.1	505	9	0.0178218	1	PER1=9aa(32-40)	Family-wise	3512.para.1	ANXA7;ANXA11	NO
	ANXA7	ENST00000372919.4	CCDS7326.1	488	7	0.0143443	1	PER1=7aa(36-42)	Family-wise	3512.para.1	ANXA7;ANXA11	NO
	APLP1	ENST00000221891.4	CCDS32997.1	651	23	0.0353303	2	PER1=9aa(569-577),PER2=14aa(590-603)	Family-wise	3536.para.1	APLP2;APP;APLP1	NO
	APLP2	ENST00000263574.5	CCDS8486.1	763	23	0.0301442	2	PER1=9aa(662-670),PER2=14aa(702-715)	Family-wise	3536.para.1	APLP2;APP;APLP1	NO
	AQP1	ENST00000311813.4	CCDS5431.1	269	14	0.0520446	1	PER1=14aa(187-200)	Family-wise	2627.para.1	AQP5;AQP2;MIP;AQP6;AQP4;AQP1	NO
	AQP2	ENST00000199280.3	CCDS8792.1	271	14	0.0516605	1	PER1=14aa(179-192)	Family-wise	2627.para.1	AQP5;AQP2;MIP;AQP6;AQP4;AQP1	NO
	AQP4	ENST00000383168.4	CCDS11889.1	323	14	0.0433437	1	PER1=14aa(208-221)	Family-wise	2627.para.1	AQP5;AQP2;MIP;AQP6;AQP4;AQP1	NO
	AQP5	ENST00000293599.6	CCDS8793.1	265	14	0.0528302	1	PER1=14aa(180-193)	Family-wise	2627.para.1	AQP5;AQP2;MIP;AQP6;AQP4;AQP1	NO
	AQP6	ENST00000315520.5	CCDS31798.1	282	14	0.0496454	1	PER1=14aa(191-204)	Family-wise	2627.para.1	AQP5;AQP2;MIP;AQP6;AQP4;AQP1	NO
	AR	ENST00000374690.3	CCDS14387.1	920	154	0.167391	11	PER1=14aa(558-571),PER2=14aa(573-586),PER3=14aa(597-610),PER4=9aa(612-620),PER5=14aa(681-694),PER6=14aa(701-714),PER7=14aa(721-734),PER8=24aa(736-759),PER9=14aa(761-774),PER10=9aa(866-874),PER11=14aa(891-904)	Family-wise	1023.para.1	NR3C1;NR3C2;PGR;AR;NR4A3;NR4A2;NR4A1	NO
	ARAF	ENST00000377045.4	CCDS75970.1	609	51	0.0837438	4	PER1=14aa(103-116),PER2=14aa(211-224),PER3=9aa(321-329),PER4=14aa(448-461)	Family-wise	1916.para.2	RAF1;ARAF;BRAF;KSR1	NO
	ARHGAP10	ENST00000336498.3	CCDS34075.1	786	9	0.0114504	1	PER1=9aa(416-424)	Family-wise	34.para.1	ARHGAP10;ARHGAP26;OPHN1	NO
	ARHGAP15	ENST00000295095.6	CCDS2184.1	475	9	0.0189474	1	PER1=9aa(229-237)	Family-wise	34.para.3	CHN2;CHN1;ARHGAP15	NO
	ARHGAP26	ENST00000274498.4	CCDS4277.1	814	9	0.0110565	1	PER1=9aa(410-418)	Family-wise	34.para.1	ARHGAP10;ARHGAP26;OPHN1	NO
	ARSA	ENST00000216124.5	CCDS14100.2	509	100	0.196464	8	PER1=14aa(26-39),PER2=24aa(66-89),PER3=9aa(119-127),PER4=14aa(145-158),PER5=9aa(280-288),PER6=8aa(295-302),PER7=13aa(305-317),PER8=9aa(333-341)	Family-wise	2947.para.1	GALNS;ARSA;ARSG;ARSD;ARSH;ARSE;ARSF;STS;ARSJ;ARSI;ARSB	NO
	ARSB	ENST00000264914.4	CCDS4043.1	533	98	0.183865	8	PER1=14aa(48-61),PER2=23aa(87-109),PER3=9aa(139-147),PER4=13aa(164-176),PER5=9aa(297-305),PER6=8aa(309-316),PER7=13aa(319-331),PER8=9aa(348-356)	Family-wise	2947.para.1	GALNS;ARSA;ARSG;ARSD;ARSH;ARSE;ARSF;STS;ARSJ;ARSI;ARSB	NO
	ARSD	ENST00000381154.1	CCDS35196.1	593	100	0.168634	8	PER1=14aa(44-57),PER2=24aa(84-107),PER3=9aa(142-150),PER4=13aa(172-184),PER5=9aa(353-361),PER6=8aa(372-379),PER7=14aa(382-395),PER8=9aa(412-420)	Family-wise	2947.para.1	GALNS;ARSA;ARSG;ARSD;ARSH;ARSE;ARSF;STS;ARSJ;ARSI;ARSB	NO
	ARSE	ENST00000381134.3	CCDS75948.1	614	100	0.162866	8	PER1=14aa(66-79),PER2=24aa(106-129),PER3=9aa(164-172),PER4=13aa(194-206),PER5=9aa(375-383),PER6=8aa(394-401),PER7=14aa(404-417),PER8=9aa(434-442)	Family-wise	2947.para.1	GALNS;ARSA;ARSG;ARSD;ARSH;ARSE;ARSF;STS;ARSJ;ARSI;ARSB	NO
	ARSF	ENST00000381127.1	CCDS14123.1	590	100	0.169492	8	PER1=14aa(33-46),PER2=24aa(73-96),PER3=9aa(131-139),PER4=13aa(161-173),PER5=9aa(342-350),PER6=8aa(361-368),PER7=14aa(371-384),PER8=9aa(401-409)	Family-wise	2947.para.1	GALNS;ARSA;ARSG;ARSD;ARSH;ARSE;ARSF;STS;ARSJ;ARSI;ARSB	NO
	ARSG	ENST00000448504.2	CCDS11676.1	525	100	0.190476	8	PER1=14aa(39-52),PER2=24aa(79-102),PER3=9aa(131-139),PER4=13aa(155-167),PER5=9aa(299-307),PER6=9aa(314-322),PER7=13aa(334-346),PER8=9aa(363-371)	Family-wise	2947.para.1	GALNS;ARSA;ARSG;ARSD;ARSH;ARSE;ARSF;STS;ARSJ;ARSI;ARSB	NO
	ARSH	ENST00000381130.2	CCDS35198.1	562	100	0.177936	8	PER1=14aa(10-23),PER2=24aa(50-73),PER3=9aa(109-117),PER4=13aa(139-151),PER5=9aa(320-328),PER6=8aa(339-346),PER7=14aa(349-362),PER8=9aa(379-387)	Family-wise	2947.para.1	GALNS;ARSA;ARSG;ARSD;ARSH;ARSE;ARSF;STS;ARSJ;ARSI;ARSB	NO
	ARSI	ENST00000328668.7	CCDS34275.1	569	98	0.172232	8	PER1=14aa(50-63),PER2=23aa(89-111),PER3=9aa(141-149),PER4=13aa(166-178),PER5=9aa(294-302),PER6=8aa(306-313),PER7=13aa(316-328),PER8=9aa(345-353)	Family-wise	2947.para.1	GALNS;ARSA;ARSG;ARSD;ARSH;ARSE;ARSF;STS;ARSJ;ARSI;ARSB	NO
	ARSJ	ENST00000315366.7	CCDS43264.1	599	98	0.163606	8	PER1=14aa(79-92),PER2=23aa(118-140),PER3=9aa(170-178),PER4=13aa(195-207),PER5=9aa(324-332),PER6=8aa(336-343),PER7=13aa(346-358),PER8=9aa(375-383)	Family-wise	2947.para.1	GALNS;ARSA;ARSG;ARSD;ARSH;ARSE;ARSF;STS;ARSJ;ARSI;ARSB	NO
	ASCC3	ENST00000369162.2	CCDS5046.1	2202	9	0.00408719	1	PER1=9aa(675-683)	Family-wise	535.para.1	ASCC3;SNRNP200	NO
	ATAD3B	ENST00000308647.7	CCDS30.1	648	9	0.0138889	1	PER1=9aa(46-54)	Family-wise	1489.para.1	ATAD3A;ATAD3B	NO
	ATL1	ENST00000358385.6	CCDS9700.1	558	18	0.0322581	2	PER1=9aa(191-199),PER2=9aa(406-414)	Family-wise	1549.para.1	ATL1;ATL2;ATL3	NO
	ATL2	ENST00000378954.4	CCDS46260.1	583	18	0.0308748	2	PER1=9aa(218-226),PER2=9aa(433-441)	Family-wise	1549.para.1	ATL1;ATL2;ATL3	NO
	ATL3	ENST00000398868.3	CCDS41663.1	541	18	0.0332717	2	PER1=9aa(187-195),PER2=9aa(402-410)	Family-wise	1549.para.1	ATL1;ATL2;ATL3	NO
	ATP10A	ENST00000356865.6	CCDS32178.1	1499	14	0.00933956	1	PER1=14aa(423-436)	Family-wise	2721.para.1	ATP8B2;ATP8B4;ATP8B1;ATP8A2;ATP8A1;ATP11C;ATP11A;ATP11B;ATP10D;ATP10B;ATP10A	NO
	ATP10B	ENST00000327245.5	CCDS43394.1	1461	14	0.00958248	1	PER1=14aa(429-442)	Family-wise	2721.para.1	ATP8B2;ATP8B4;ATP8B1;ATP8A2;ATP8A1;ATP11C;ATP11A;ATP11B;ATP10D;ATP10B;ATP10A	NO
	ATP10D	ENST00000273859.3	CCDS3476.1	1426	14	0.00981767	1	PER1=14aa(434-447)	Family-wise	2721.para.1	ATP8B2;ATP8B4;ATP8B1;ATP8A2;ATP8A1;ATP11C;ATP11A;ATP11B;ATP10D;ATP10B;ATP10A	NO
	ATP11A	ENST00000487903.1	CCDS32011.1	1134	14	0.0123457	1	PER1=14aa(410-423)	Family-wise	2721.para.1	ATP8B2;ATP8B4;ATP8B1;ATP8A2;ATP8A1;ATP11C;ATP11A;ATP11B;ATP10D;ATP10B;ATP10A	NO
	ATP11B	ENST00000323116.5	CCDS33896.1	1177	14	0.0118946	1	PER1=14aa(403-416)	Family-wise	2721.para.1	ATP8B2;ATP8B4;ATP8B1;ATP8A2;ATP8A1;ATP11C;ATP11A;ATP11B;ATP10D;ATP10B;ATP10A	NO
	ATP11C	ENST00000327569.3	CCDS14668.1	1132	14	0.0123675	1	PER1=14aa(408-421)	Family-wise	2721.para.1	ATP8B2;ATP8B4;ATP8B1;ATP8A2;ATP8A1;ATP11C;ATP11A;ATP11B;ATP10D;ATP10B;ATP10A	NO
	ATP6V0A1	ENST00000264649.6	CCDS45683.1	838	9	0.0107399	1	PER1=9aa(416-424)	Family-wise	2643.para.1	ATP6V0A1;ATP6V0A4;ATP6V0A2;TCIRG1	NO
	ATP6V0A2	ENST00000330342.3	CCDS9254.1	856	9	0.010514	1	PER1=9aa(414-422)	Family-wise	2643.para.1	ATP6V0A1;ATP6V0A4;ATP6V0A2;TCIRG1	NO
	ATP6V0A4	ENST00000310018.2	CCDS5849.1	840	9	0.0107143	1	PER1=9aa(411-419)	Family-wise	2643.para.1	ATP6V0A1;ATP6V0A4;ATP6V0A2;TCIRG1	NO
	ATP7B	ENST00000242839.4	CCDS41892.1	1465	23	0.0156997	2	PER1=14aa(976-989),PER2=9aa(1026-1034)	Family-wise	2651.para.1	ATP7B;ATP7A	NO
	ATP8A1	ENST00000381668.5	CCDS3466.1	1164	14	0.0120275	1	PER1=14aa(405-418)	Family-wise	2721.para.1	ATP8B2;ATP8B4;ATP8B1;ATP8A2;ATP8A1;ATP11C;ATP11A;ATP11B;ATP10D;ATP10B;ATP10A	NO
	ATP8A2	ENST00000381655.2	CCDS41873.1	1188	14	0.0117845	1	PER1=14aa(424-437)	Family-wise	2721.para.1	ATP8B2;ATP8B4;ATP8B1;ATP8A2;ATP8A1;ATP11C;ATP11A;ATP11B;ATP10D;ATP10B;ATP10A	NO
	ATP8B1	ENST00000536015.1	CCDS11965.1	1251	14	0.011191	1	PER1=14aa(450-463)	Family-wise	2721.para.1	ATP8B2;ATP8B4;ATP8B1;ATP8A2;ATP8A1;ATP11C;ATP11A;ATP11B;ATP10D;ATP10B;ATP10A	NO
	ATP8B2	ENST00000368489.3	CCDS1066.1	1223	14	0.0114473	1	PER1=14aa(421-434)	Family-wise	2721.para.1	ATP8B2;ATP8B4;ATP8B1;ATP8A2;ATP8A1;ATP11C;ATP11A;ATP11B;ATP10D;ATP10B;ATP10A	NO
	ATP8B4	ENST00000284509.6	CCDS32238.1	1192	14	0.011745	1	PER1=14aa(388-401)	Family-wise	2721.para.1	ATP8B2;ATP8B4;ATP8B1;ATP8A2;ATP8A1;ATP11C;ATP11A;ATP11B;ATP10D;ATP10B;ATP10A	NO
	BCL11B	ENST00000357195.3	CCDS9950.1	894	9	0.0100671	1	PER1=9aa(56-64)	Family-wise	266.para.1	BCL11B;BCL11A	NO
	BDH1	ENST00000392379.1	CCDS3328.1	343	9	0.0262391	1	PER1=9aa(206-214)	Family-wise	1183.para.1	HSD11B2;HSD17B2;RDH16;HSD17B6;RDH5;SDR9C7;DHRS9;BDH1;HSD17B1;RDH8;DHRS7C;DHRS7B;DHRS7;KDSR	NO
	BMPR1A	ENST00000372037.3	CCDS7378.1	532	41	0.0770677	4	PER1=9aa(228-236),PER2=14aa(357-370),PER3=9aa(404-412),PER4=9aa(428-436)	Family-wise	661.para.1	ACVR2B;ACVR2A;TGFBR2;ACVR1B;TGFBR1;ACVR1C;BMPR1B;BMPR1A;ACVRL1;ACVR1;AMHR2	NO
	BMPR1B	ENST00000440890.2	CCDS58919.1	532	41	0.0770677	4	PER1=9aa(228-236),PER2=14aa(357-370),PER3=9aa(404-412),PER4=9aa(428-436)	Family-wise	661.para.1	ACVR2B;ACVR2A;TGFBR2;ACVR1B;TGFBR1;ACVR1C;BMPR1B;BMPR1A;ACVRL1;ACVR1;AMHR2	NO
	CABP2	ENST00000294288.4	CCDS8170.1	220	33	0.15	2	PER1=14aa(161-174),PER2=19aa(196-214)	Family-wise	3213.para.1	CALM2;CALM1;CALM3;CALML3;CALML5;TNNC2;TNNC1;CALML4;CABP2;CABP5;CABP4;CALML6	NO
	CABP4	ENST00000325656.5	CCDS8166.1	275	33	0.12	2	PER1=14aa(215-228),PER2=19aa(250-268)	Family-wise	3213.para.1	CALM2;CALM1;CALM3;CALML3;CALML5;TNNC2;TNNC1;CALML4;CABP2;CABP5;CABP4;CALML6	NO
	CABP5	ENST00000293255.2	CCDS12709.1	173	33	0.190751	2	PER1=14aa(114-127),PER2=19aa(149-167)	Family-wise	3213.para.1	CALM2;CALM1;CALM3;CALML3;CALML5;TNNC2;TNNC1;CALML4;CABP2;CABP5;CABP4;CALML6	NO
	CACNA1A	ENST00000360228.5	CCDS45998.1	2506	23	0.00917797	2	PER1=9aa(191-199),PER2=14aa(705-718)	Family-wise	2614.para.1	CACNA1B;CACNA1A;CACNA1E	NO
	CACNA1B	ENST00000371372.1	CCDS59522.1	2339	23	0.00983326	2	PER1=9aa(188-196),PER2=14aa(701-714)	Family-wise	2614.para.1	CACNA1B;CACNA1A;CACNA1E	NO
	CACNA1C	ENST00000347598.4	CCDS44788.1	2186	18	0.00823422	2	PER1=9aa(744-752),PER2=9aa(1574-1582)	Family-wise	2614.para.4	CACNA1D;CACNA1C;CACNA1F;CACNA1S	NO
	CACNA1D	ENST00000288139.4	CCDS2872.1	2181	18	0.00825309	2	PER1=9aa(763-771),PER2=9aa(1534-1542)	Family-wise	2614.para.4	CACNA1D;CACNA1C;CACNA1F;CACNA1S	NO
	CACNA1F	ENST00000376265.2	CCDS35253.1	1977	18	0.0091047	2	PER1=9aa(749-757),PER2=9aa(1491-1499)	Family-wise	2614.para.4	CACNA1D;CACNA1C;CACNA1F;CACNA1S	NO
	CACNA1S	ENST00000362061.3	CCDS1407.1	1873	18	0.00961025	2	PER1=9aa(652-660),PER2=9aa(1431-1439)	Family-wise	2614.para.4	CACNA1D;CACNA1C;CACNA1F;CACNA1S	NO
	CALM1	ENST00000356978.4	CCDS9892.1	149	33	0.221477	2	PER1=14aa(90-103),PER2=19aa(124-142)	Family-wise	3213.para.1	CALM2;CALM1;CALM3;CALML3;CALML5;TNNC2;TNNC1;CALML4;CABP2;CABP5;CABP4;CALML6	NO
	CALM2	ENST00000272298.7	CCDS1832.1	149	33	0.221477	2	PER1=14aa(90-103),PER2=19aa(124-142)	Family-wise	3213.para.1	CALM2;CALM1;CALM3;CALML3;CALML5;TNNC2;TNNC1;CALML4;CABP2;CABP5;CABP4;CALML6	NO
	CALM3	ENST00000291295.9	CCDS33061.1	149	33	0.221477	2	PER1=14aa(90-103),PER2=19aa(124-142)	Family-wise	3213.para.1	CALM2;CALM1;CALM3;CALML3;CALML5;TNNC2;TNNC1;CALML4;CABP2;CABP5;CABP4;CALML6	NO
	CALML3	ENST00000315238.1	CCDS7069.1	149	33	0.221477	2	PER1=14aa(90-103),PER2=19aa(124-142)	Family-wise	3213.para.1	CALM2;CALM1;CALM3;CALML3;CALML5;TNNC2;TNNC1;CALML4;CABP2;CABP5;CABP4;CALML6	NO
	CALML4	ENST00000467889.1	CCDS10226.2	196	33	0.168367	2	PER1=14aa(133-146),PER2=19aa(167-185)	Family-wise	3213.para.1	CALM2;CALM1;CALM3;CALML3;CALML5;TNNC2;TNNC1;CALML4;CABP2;CABP5;CABP4;CALML6	NO
	CALML5	ENST00000380332.3	CCDS7068.1	146	33	0.226027	2	PER1=14aa(87-100),PER2=19aa(121-139)	Family-wise	3213.para.1	CALM2;CALM1;CALM3;CALML3;CALML5;TNNC2;TNNC1;CALML4;CABP2;CABP5;CABP4;CALML6	NO
	CALML6	ENST00000307786.3	CCDS30566.1	181	33	0.18232	2	PER1=14aa(116-129),PER2=19aa(150-168)	Family-wise	3213.para.1	CALM2;CALM1;CALM3;CALML3;CALML5;TNNC2;TNNC1;CALML4;CABP2;CABP5;CABP4;CALML6	NO
	CAMK1G	ENST00000009105.1	CCDS1486.1	476	23	0.0483193	2	PER1=9aa(116-124),PER2=14aa(284-297)	Family-wise	3041.para.3	CAMK2D;CAMK2G;CAMK2B;CAMK2A;CAMK4;CAMK1G;CAMKV	NO
	CAMK2A	ENST00000398376.3	CCDS43387.1	489	23	0.0470348	2	PER1=9aa(108-116),PER2=14aa(278-291)	Family-wise	3041.para.3	CAMK2D;CAMK2G;CAMK2B;CAMK2A;CAMK4;CAMK1G;CAMKV	NO
	CAMK2B	ENST00000395749.2	CCDS5483.1	666	23	0.0345345	2	PER1=9aa(109-117),PER2=14aa(279-292)	Family-wise	3041.para.3	CAMK2D;CAMK2G;CAMK2B;CAMK2A;CAMK4;CAMK1G;CAMKV	NO
	CAMK2D	ENST00000342666.5	CCDS3703.1	499	23	0.0460922	2	PER1=9aa(109-117),PER2=14aa(279-292)	Family-wise	3041.para.3	CAMK2D;CAMK2G;CAMK2B;CAMK2A;CAMK4;CAMK1G;CAMKV	NO
	CAMK2G	ENST00000322680.3	CCDS7338.1	556	23	0.0413669	2	PER1=9aa(109-117),PER2=14aa(279-292)	Family-wise	3041.para.3	CAMK2D;CAMK2G;CAMK2B;CAMK2A;CAMK4;CAMK1G;CAMKV	NO
	CAMK4	ENST00000282356.4	CCDS4103.1	473	22	0.0465116	2	PER1=9aa(137-145),PER2=13aa(306-318)	Family-wise	3041.para.3	CAMK2D;CAMK2G;CAMK2B;CAMK2A;CAMK4;CAMK1G;CAMKV	NO
	CAMKV	ENST00000477224.1	CCDS33762.1	501	23	0.0459082	2	PER1=9aa(118-126),PER2=14aa(293-306)	Family-wise	3041.para.3	CAMK2D;CAMK2G;CAMK2B;CAMK2A;CAMK4;CAMK1G;CAMKV	NO
	CBFA2T2	ENST00000346541.3	CCDS13221.1	604	14	0.0231788	1	PER1=14aa(195-208)	Family-wise	2365.para.1	RUNX1T1;CBFA2T3;CBFA2T2;DEAF1	NO
	CBFA2T3	ENST00000268679.4	CCDS10972.1	653	14	0.0214395	1	PER1=14aa(253-266)	Family-wise	2365.para.1	RUNX1T1;CBFA2T3;CBFA2T2;DEAF1	NO
	CCND1	ENST00000227507.2	CCDS8191.1	295	9	0.0305085	1	PER1=9aa(283-291)	Family-wise	660.para.1	CCND2;CCND3;CCND1	NO
	CCND3	ENST00000372991.4	CCDS4863.1	292	9	0.0308219	1	PER1=9aa(280-288)	Family-wise	660.para.1	CCND2;CCND3;CCND1	NO
	CDC42	ENST00000344548.3	CCDS222.1	191	14	0.0732984	1	PER1=14aa(55-68)	Family-wise	2241.para.1	RHOU;RHOV;RAC3;RAC1;RAC2;RHOG;CDC42;RHOJ;RHOQ;RHOH	NO
	CDK12	ENST00000447079.4	CCDS11337.1	1490	18	0.0120805	2	PER1=9aa(875-883),PER2=9aa(895-903)	Family-wise	3125.para.1	CDK13;CDK12	NO
	CDK13	ENST00000181839.4	CCDS5461.1	1512	18	0.0119048	2	PER1=9aa(853-861),PER2=9aa(873-881)	Family-wise	3125.para.1	CDK13;CDK12	NO
	CDK19	ENST00000368911.3	CCDS5085.1	502	9	0.0179283	1	PER1=9aa(26-34)	Family-wise	2877.para.1	CDK19;CDK8	NO
	CDK8	ENST00000381527.3	CCDS9317.1	464	9	0.0193966	1	PER1=9aa(26-34)	Family-wise	2877.para.1	CDK19;CDK8	NO
	CDX1	ENST00000231656.8	CCDS4304.1	265	9	0.0339623	1	PER1=9aa(199-207)	Family-wise	1434.para.1	CDX2;CDX1;CDX4	NO
	CDX2	ENST00000381020.7	CCDS9328.1	313	9	0.028754	1	PER1=9aa(231-239)	Family-wise	1434.para.1	CDX2;CDX1;CDX4	NO
	CDX4	ENST00000373514.2	CCDS14424.1	284	9	0.0316901	1	PER1=9aa(218-226)	Family-wise	1434.para.1	CDX2;CDX1;CDX4	NO
	CFTR	ENST00000003084.6	CCDS5773.1	1480	9	0.00608108	1	PER1=9aa(1283-1291)	Family-wise	2390.para.1	ABCC3;ABCC1;ABCC2;ABCC6;ABCC4;ABCC11;ABCC12;ABCC5;ABCC10;CFTR	NO
	CHAT	ENST00000337653.2	CCDS7232.1	748	17	0.0227273	2	PER1=8aa(206-213),PER2=9aa(418-426)	Family-wise	455.para.1	CHAT;CRAT;CROT;CPT1A;CPT1B;CPT1C	NO
	CHD4	ENST00000357008.2	CCDS8552.1	1912	9	0.00470711	1	PER1=9aa(1145-1153)	Family-wise	2417.para.1	CHD5;CHD4;CHD3	NO
	CHD5	ENST00000262450.3	CCDS57.1	1954	9	0.00460594	1	PER1=9aa(1119-1127)	Family-wise	2417.para.1	CHD5;CHD4;CHD3	NO
	CHL1	ENST00000256509.2	CCDS2556.1	1224	9	0.00735294	1	PER1=9aa(319-327)	Family-wise	155.para.1	NRCAM;NFASC;CHL1;L1CAM;CNTN2;CNTN1;CNTN3;CNTN4;CNTN6;CNTN5	NO
	CHM	ENST00000357749.2	CCDS14454.1	653	9	0.0137825	1	PER1=9aa(453-461)	Family-wise	388.para.2	CHM;CHML	NO
	CHML	ENST00000366553.1	CCDS31073.1	656	9	0.0137195	1	PER1=9aa(455-463)	Family-wise	388.para.2	CHM;CHML	NO
	CHN2	ENST00000222792.6	CCDS5420.1	468	9	0.0192308	1	PER1=9aa(229-237)	Family-wise	34.para.3	CHN2;CHN1;ARHGAP15	NO
	CHRNA1	ENST00000261007.5	CCDS33331.1	482	42	0.0871369	3	PER1=9aa(270-278),PER2=24aa(289-312),PER3=9aa(314-322)	Family-wise	2424.para.1	CHRNA3;CHRNA6;CHRNA2;CHRNA4;CHRNB3;CHRNA5;CHRNB4;CHRNB2;CHRNA1;CHRNB1;CHRNE;CHRNG;CHRND	NO
	CHRNA2	ENST00000407991.1	CCDS6059.1	529	42	0.0793951	3	PER1=9aa(279-287),PER2=24aa(298-321),PER3=9aa(323-331)	Family-wise	2424.para.1	CHRNA3;CHRNA6;CHRNA2;CHRNA4;CHRNB3;CHRNA5;CHRNB4;CHRNB2;CHRNA1;CHRNB1;CHRNE;CHRNG;CHRND	NO
	CHRNA3	ENST00000326828.5	CCDS10305.1	505	42	0.0831683	3	PER1=9aa(255-263),PER2=24aa(274-297),PER3=9aa(299-307)	Family-wise	2424.para.1	CHRNA3;CHRNA6;CHRNA2;CHRNA4;CHRNB3;CHRNA5;CHRNB4;CHRNB2;CHRNA1;CHRNB1;CHRNE;CHRNG;CHRND	NO
	CHRNA4	ENST00000370263.4	CCDS13517.1	627	42	0.0669856	3	PER1=9aa(257-265),PER2=24aa(276-299),PER3=9aa(301-309)	Family-wise	2424.para.1	CHRNA3;CHRNA6;CHRNA2;CHRNA4;CHRNB3;CHRNA5;CHRNB4;CHRNB2;CHRNA1;CHRNB1;CHRNE;CHRNG;CHRND	NO
	CHRNA5	ENST00000299565.5	CCDS10304.1	468	42	0.0897436	3	PER1=9aa(264-272),PER2=24aa(283-306),PER3=9aa(308-316)	Family-wise	2424.para.1	CHRNA3;CHRNA6;CHRNA2;CHRNA4;CHRNB3;CHRNA5;CHRNB4;CHRNB2;CHRNA1;CHRNB1;CHRNE;CHRNG;CHRND	NO
	CHRNA6	ENST00000276410.2	CCDS6135.1	494	42	0.0850202	3	PER1=9aa(254-262),PER2=24aa(273-296),PER3=9aa(298-306)	Family-wise	2424.para.1	CHRNA3;CHRNA6;CHRNA2;CHRNA4;CHRNB3;CHRNA5;CHRNB4;CHRNB2;CHRNA1;CHRNB1;CHRNE;CHRNG;CHRND	NO
	CHRNB2	ENST00000368476.3	CCDS1070.1	502	42	0.0836653	3	PER1=9aa(248-256),PER2=24aa(267-290),PER3=9aa(292-300)	Family-wise	2424.para.1	CHRNA3;CHRNA6;CHRNA2;CHRNA4;CHRNB3;CHRNA5;CHRNB4;CHRNB2;CHRNA1;CHRNB1;CHRNE;CHRNG;CHRND	NO
	CHRNB3	ENST00000289957.2	CCDS6134.1	458	42	0.0917031	3	PER1=9aa(247-255),PER2=24aa(266-289),PER3=9aa(291-299)	Family-wise	2424.para.1	CHRNA3;CHRNA6;CHRNA2;CHRNA4;CHRNB3;CHRNA5;CHRNB4;CHRNB2;CHRNA1;CHRNB1;CHRNE;CHRNG;CHRND	NO
	CHRNB4	ENST00000261751.3	CCDS10306.1	498	42	0.0843373	3	PER1=9aa(246-254),PER2=24aa(265-288),PER3=9aa(290-298)	Family-wise	2424.para.1	CHRNA3;CHRNA6;CHRNA2;CHRNA4;CHRNB3;CHRNA5;CHRNB4;CHRNB2;CHRNA1;CHRNB1;CHRNE;CHRNG;CHRND	NO
	CHRND	ENST00000258385.3	CCDS2494.1	517	42	0.0812379	3	PER1=9aa(260-268),PER2=24aa(279-302),PER3=9aa(304-312)	Family-wise	2424.para.1	CHRNA3;CHRNA6;CHRNA2;CHRNA4;CHRNB3;CHRNA5;CHRNB4;CHRNB2;CHRNA1;CHRNB1;CHRNE;CHRNG;CHRND	NO
	CHRNE	ENST00000293780.4	CCDS11058.1	493	42	0.0851927	3	PER1=9aa(254-262),PER2=24aa(274-297),PER3=9aa(299-307)	Family-wise	2424.para.1	CHRNA3;CHRNA6;CHRNA2;CHRNA4;CHRNB3;CHRNA5;CHRNB4;CHRNB2;CHRNA1;CHRNB1;CHRNE;CHRNG;CHRND	NO
	CHRNG	ENST00000389494.3	CCDS33400.1	517	42	0.0812379	3	PER1=9aa(255-263),PER2=24aa(275-298),PER3=9aa(300-308)	Family-wise	2424.para.1	CHRNA3;CHRNA6;CHRNA2;CHRNA4;CHRNB3;CHRNA5;CHRNB4;CHRNB2;CHRNA1;CHRNB1;CHRNE;CHRNG;CHRND	NO
	CHST1	ENST00000308064.2	CCDS7913.1	411	37	0.0900243	3	PER1=14aa(66-79),PER2=9aa(86-94),PER3=14aa(231-244)	Family-wise	2274.para.1	CHST7;CHST2;CHST5;CHST6;CHST4;CHST3;CHST1	NO
	CHST2	ENST00000309575.3	CCDS3129.1	530	37	0.0698113	3	PER1=14aa(170-183),PER2=9aa(190-198),PER3=14aa(329-342)	Family-wise	2274.para.1	CHST7;CHST2;CHST5;CHST6;CHST4;CHST3;CHST1	NO
	CHST3	ENST00000373115.4	CCDS7312.1	479	37	0.0772443	3	PER1=14aa(138-151),PER2=9aa(158-166),PER3=14aa(298-311)	Family-wise	2274.para.1	CHST7;CHST2;CHST5;CHST6;CHST4;CHST3;CHST1	NO
	CHST4	ENST00000338482.5	CCDS10902.1	386	37	0.0958549	3	PER1=14aa(48-61),PER2=9aa(68-76),PER3=14aa(202-215)	Family-wise	2274.para.1	CHST7;CHST2;CHST5;CHST6;CHST4;CHST3;CHST1	NO
	CHST5	ENST00000336257.3	CCDS10919.1	411	37	0.0900243	3	PER1=14aa(68-81),PER2=9aa(88-96),PER3=14aa(221-234)	Family-wise	2274.para.1	CHST7;CHST2;CHST5;CHST6;CHST4;CHST3;CHST1	NO
	CHST6	ENST00000332272.4	CCDS10918.1	395	37	0.0936709	3	PER1=14aa(46-59),PER2=9aa(66-74),PER3=14aa(199-212)	Family-wise	2274.para.1	CHST7;CHST2;CHST5;CHST6;CHST4;CHST3;CHST1	NO
	CHST7	ENST00000276055.3	CCDS14268.1	486	37	0.0761317	3	PER1=14aa(107-120),PER2=9aa(127-135),PER3=14aa(275-288)	Family-wise	2274.para.1	CHST7;CHST2;CHST5;CHST6;CHST4;CHST3;CHST1	NO
	CLCN3	ENST00000347613.4	CCDS34100.1	866	18	0.0207852	2	PER1=9aa(533-541),PER2=9aa(588-596)	Family-wise	2685.para.1	CLCN5;CLCN4;CLCN3;CLCN7;CLCNKA;CLCNKB	NO
	CLCN4	ENST00000380833.4	CCDS14137.1	760	18	0.0236842	2	PER1=9aa(475-483),PER2=9aa(530-538)	Family-wise	2685.para.1	CLCN5;CLCN4;CLCN3;CLCN7;CLCNKA;CLCNKB	NO
	CLCN5	ENST00000376088.3	CCDS48115.1	816	18	0.0220588	2	PER1=9aa(531-539),PER2=9aa(586-594)	Family-wise	2685.para.1	CLCN5;CLCN4;CLCN3;CLCN7;CLCNKA;CLCNKB	NO
	CLCN7	ENST00000382745.4	CCDS32361.1	805	18	0.0223602	2	PER1=9aa(520-528),PER2=9aa(561-569)	Family-wise	2685.para.1	CLCN5;CLCN4;CLCN3;CLCN7;CLCNKA;CLCNKB	NO
	CLCNKA	ENST00000331433.4	CCDS167.1	687	17	0.0247453	2	PER1=9aa(432-440),PER2=8aa(480-487)	Family-wise	2685.para.1	CLCN5;CLCN4;CLCN3;CLCN7;CLCNKA;CLCNKB	NO
	CLCNKB	ENST00000375679.4	CCDS168.1	687	17	0.0247453	2	PER1=9aa(432-440),PER2=8aa(480-487)	Family-wise	2685.para.1	CLCN5;CLCN4;CLCN3;CLCN7;CLCNKA;CLCNKB	NO
	CLOCK	ENST00000309964.4	CCDS3500.1	846	14	0.0165485	1	PER1=14aa(581-594)	Family-wise	1782.para.3	SIM1;SIM2;NPAS3;HIF1A;EPAS1;HIF3A;NPAS2;CLOCK	NO
	CNGA1	ENST00000402813.3	CCDS47050.1	759	122	0.160738	7	PER1=14aa(244-257),PER2=19aa(336-354),PER3=24aa(376-399),PER4=28aa(417-444),PER5=19aa(456-474),PER6=9aa(576-584),PER7=9aa(605-613)	Family-wise	933.para.1	CNGA3;CNGA1;CNGA2;CNGA4;CNGB3;HCN1;HCN2;HCN3;KCNH8;KCNH4;KCNH3;KCNH2;KCNH6;KCNH7;KCNH1;KCNH5	NO
	CNGA2	ENST00000329903.4	CCDS14701.1	664	122	0.183735	7	PER1=14aa(150-163),PER2=19aa(242-260),PER3=24aa(282-305),PER4=28aa(323-350),PER5=19aa(362-380),PER6=9aa(482-490),PER7=9aa(511-519)	Family-wise	933.para.1	CNGA3;CNGA1;CNGA2;CNGA4;CNGB3;HCN1;HCN2;HCN3;KCNH8;KCNH4;KCNH3;KCNH2;KCNH6;KCNH7;KCNH1;KCNH5	NO
	CNGA3	ENST00000393504.1	CCDS2034.1	694	122	0.175793	7	PER1=14aa(178-191),PER2=19aa(270-288),PER3=24aa(310-333),PER4=28aa(351-378),PER5=19aa(390-408),PER6=9aa(510-518),PER7=9aa(539-547)	Family-wise	933.para.1	CNGA3;CNGA1;CNGA2;CNGA4;CNGB3;HCN1;HCN2;HCN3;KCNH8;KCNH4;KCNH3;KCNH2;KCNH6;KCNH7;KCNH1;KCNH5	NO
	CNGA4	ENST00000379936.2	CCDS31408.1	575	122	0.212174	7	PER1=14aa(44-57),PER2=19aa(136-154),PER3=24aa(176-199),PER4=28aa(217-244),PER5=19aa(256-274),PER6=9aa(376-384),PER7=9aa(405-413)	Family-wise	933.para.1	CNGA3;CNGA1;CNGA2;CNGA4;CNGB3;HCN1;HCN2;HCN3;KCNH8;KCNH4;KCNH3;KCNH2;KCNH6;KCNH7;KCNH1;KCNH5	NO
	CNGB3	ENST00000320005.5	CCDS6244.1	809	122	0.150803	7	PER1=14aa(228-241),PER2=19aa(320-338),PER3=24aa(360-383),PER4=28aa(393-420),PER5=19aa(432-450),PER6=9aa(552-560),PER7=9aa(582-590)	Family-wise	933.para.1	CNGA3;CNGA1;CNGA2;CNGA4;CNGB3;HCN1;HCN2;HCN3;KCNH8;KCNH4;KCNH3;KCNH2;KCNH6;KCNH7;KCNH1;KCNH5	NO
	CNNM2	ENST00000369878.4	CCDS44474.1	875	18	0.0205714	2	PER1=9aa(269-277),PER2=9aa(567-575)	Family-wise	2302.para.1	CNNM4;CNNM2;CNNM3	NO
	CNNM3	#N/A	CCDS2025.1	707	18	0.0254597	2	PER1=9aa(148-156),PER2=9aa(435-443)	Family-wise	2302.para.1	CNNM4;CNNM2;CNNM3	NO
	CNTN1	ENST00000551295.2	CCDS8737.1	1018	9	0.00884086	1	PER1=9aa(303-311)	Family-wise	155.para.1	NRCAM;NFASC;CHL1;L1CAM;CNTN2;CNTN1;CNTN3;CNTN4;CNTN6;CNTN5	NO
	CNTN2	ENST00000331830.4	CCDS1449.1	1040	9	0.00865385	1	PER1=9aa(299-307)	Family-wise	155.para.1	NRCAM;NFASC;CHL1;L1CAM;CNTN2;CNTN1;CNTN3;CNTN4;CNTN6;CNTN5	NO
	CNTN3	ENST00000263665.6	CCDS33790.1	1028	9	0.00875486	1	PER1=9aa(290-298)	Family-wise	155.para.1	NRCAM;NFASC;CHL1;L1CAM;CNTN2;CNTN1;CNTN3;CNTN4;CNTN6;CNTN5	NO
	CNTN4	ENST00000397461.1	CCDS43041.1	1026	9	0.00877193	1	PER1=9aa(288-296)	Family-wise	155.para.1	NRCAM;NFASC;CHL1;L1CAM;CNTN2;CNTN1;CNTN3;CNTN4;CNTN6;CNTN5	NO
	CNTN5	ENST00000524871.1	CCDS53696.1	1100	9	0.00818182	1	PER1=9aa(362-370)	Family-wise	155.para.1	NRCAM;NFASC;CHL1;L1CAM;CNTN2;CNTN1;CNTN3;CNTN4;CNTN6;CNTN5	NO
	CNTN6	ENST00000446702.2	CCDS2557.1	1028	9	0.00875486	1	PER1=9aa(290-298)	Family-wise	155.para.1	NRCAM;NFASC;CHL1;L1CAM;CNTN2;CNTN1;CNTN3;CNTN4;CNTN6;CNTN5	NO
	COL11A1	ENST00000370096.3	CCDS778.1	1806	350	0.193798	25	PER1=9aa(558-566),PER2=19aa(689-707),PER3=9aa(714-722),PER4=24aa(744-767),PER5=29aa(773-801),PER6=9aa(803-811),PER7=19aa(826-844),PER8=9aa(867-875),PER9=14aa(894-907),PER10=9aa(924-932),PER11=14aa(968-981),PER12=19aa(993-1011),PER13=19aa(1030-1048),PER14=29aa(1060-1088),PER15=9aa(1107-1115),PER16=9aa(1167-1175),PER17=9aa(1182-1190),PER18=24aa(1192-1215),PER19=9aa(1228-1236),PER20=9aa(1307-1315),P…	Family-wise	648.para.1	COL11A1;COL5A1;COL11A2;COL5A3;COL2A1;COL1A1;COL5A2;COL1A2;COL3A1;COL4A1;COL4A5;COL4A3;COL4A4;COL4A2;COL4A6;COL27A1;COL24A1	NO
	COL11A2	ENST00000374708.4	CCDS43452.1	1650	350	0.212121	25	PER1=9aa(430-438),PER2=19aa(561-579),PER3=9aa(586-594),PER4=24aa(616-639),PER5=29aa(645-673),PER6=9aa(675-683),PER7=19aa(698-716),PER8=9aa(739-747),PER9=14aa(766-779),PER10=9aa(796-804),PER11=14aa(840-853),PER12=19aa(865-883),PER13=19aa(902-920),PER14=29aa(932-960),PER15=9aa(979-987),PER16=9aa(1039-1047),PER17=9aa(1054-1062),PER18=24aa(1064-1087),PER19=9aa(1100-1108),PER20=9aa(1179-1187),PER21=14…	Family-wise	648.para.1	COL11A1;COL5A1;COL11A2;COL5A3;COL2A1;COL1A1;COL5A2;COL1A2;COL3A1;COL4A1;COL4A5;COL4A3;COL4A4;COL4A2;COL4A6;COL27A1;COL24A1	NO
	COL1A1	ENST00000225964.5	CCDS11561.1	1464	350	0.239071	25	PER1=9aa(214-222),PER2=19aa(342-360),PER3=9aa(367-375),PER4=24aa(397-420),PER5=29aa(426-454),PER6=9aa(456-464),PER7=19aa(479-497),PER8=9aa(520-528),PER9=14aa(547-560),PER10=9aa(577-585),PER11=14aa(615-628),PER12=19aa(640-658),PER13=19aa(683-701),PER14=29aa(713-741),PER15=9aa(760-768),PER16=9aa(820-828),PER17=9aa(835-843),PER18=24aa(845-868),PER19=9aa(884-892),PER20=9aa(966-974),PER21=14aa(1017-10…	Family-wise	648.para.1	COL11A1;COL5A1;COL11A2;COL5A3;COL2A1;COL1A1;COL5A2;COL1A2;COL3A1;COL4A1;COL4A5;COL4A3;COL4A4;COL4A2;COL4A6;COL27A1;COL24A1	NO
	COL1A2	ENST00000297268.6	CCDS34682.1	1366	350	0.256223	25	PER1=9aa(126-134),PER2=19aa(254-272),PER3=9aa(279-287),PER4=24aa(309-332),PER5=29aa(338-366),PER6=9aa(368-376),PER7=19aa(391-409),PER8=9aa(432-440),PER9=14aa(459-472),PER10=9aa(489-497),PER11=14aa(527-540),PER12=19aa(552-570),PER13=19aa(595-613),PER14=29aa(625-653),PER15=9aa(672-680),PER16=9aa(732-740),PER17=9aa(747-755),PER18=24aa(757-780),PER19=9aa(796-804),PER20=9aa(878-886),PER21=14aa(929-942…	Family-wise	648.para.1	COL11A1;COL5A1;COL11A2;COL5A3;COL2A1;COL1A1;COL5A2;COL1A2;COL3A1;COL4A1;COL4A5;COL4A3;COL4A4;COL4A2;COL4A6;COL27A1;COL24A1	NO
	COL24A1	ENST00000370571.2	CCDS41353.1	1714	347	0.20245	25	PER1=9aa(515-523),PER2=19aa(646-664),PER3=9aa(671-679),PER4=24aa(701-724),PER5=29aa(730-758),PER6=9aa(760-768),PER7=19aa(780-798),PER8=9aa(821-829),PER9=14aa(848-861),PER10=9aa(878-886),PER11=14aa(922-935),PER12=19aa(947-965),PER13=19aa(990-1008),PER14=26aa(1020-1045),PER15=9aa(1064-1072),PER16=9aa(1118-1126),PER17=9aa(1133-1141),PER18=24aa(1143-1166),PER19=9aa(1182-1190),PER20=9aa(1262-1270),PER…	Family-wise	648.para.1	COL11A1;COL5A1;COL11A2;COL5A3;COL2A1;COL1A1;COL5A2;COL1A2;COL3A1;COL4A1;COL4A5;COL4A3;COL4A4;COL4A2;COL4A6;COL27A1;COL24A1	NO
	COL27A1	ENST00000356083.3	CCDS6802.1	1860	347	0.186559	25	PER1=9aa(654-662),PER2=19aa(785-803),PER3=9aa(810-818),PER4=24aa(840-863),PER5=29aa(869-897),PER6=9aa(899-907),PER7=19aa(919-937),PER8=9aa(960-968),PER9=14aa(987-1000),PER10=9aa(1017-1025),PER11=14aa(1061-1074),PER12=19aa(1086-1104),PER13=19aa(1129-1147),PER14=26aa(1159-1184),PER15=9aa(1203-1211),PER16=9aa(1257-1265),PER17=9aa(1272-1280),PER18=24aa(1282-1305),PER19=9aa(1321-1329),PER20=9aa(1401-1…	Family-wise	648.para.1	COL11A1;COL5A1;COL11A2;COL5A3;COL2A1;COL1A1;COL5A2;COL1A2;COL3A1;COL4A1;COL4A5;COL4A3;COL4A4;COL4A2;COL4A6;COL27A1;COL24A1	NO
	COL2A1	ENST00000380518.3	CCDS41778.1	1487	350	0.235373	25	PER1=9aa(236-244),PER2=19aa(364-382),PER3=9aa(389-397),PER4=24aa(419-442),PER5=29aa(448-476),PER6=9aa(478-486),PER7=19aa(501-519),PER8=9aa(542-550),PER9=14aa(569-582),PER10=9aa(599-607),PER11=14aa(637-650),PER12=19aa(662-680),PER13=19aa(705-723),PER14=29aa(735-763),PER15=9aa(782-790),PER16=9aa(842-850),PER17=9aa(857-865),PER18=24aa(867-890),PER19=9aa(906-914),PER20=9aa(988-996),PER21=14aa(1039-10…	Family-wise	648.para.1	COL11A1;COL5A1;COL11A2;COL5A3;COL2A1;COL1A1;COL5A2;COL1A2;COL3A1;COL4A1;COL4A5;COL4A3;COL4A4;COL4A2;COL4A6;COL27A1;COL24A1	NO
	COL3A1	ENST00000304636.3	CCDS2297.1	1466	350	0.238745	25	PER1=9aa(212-220),PER2=19aa(340-358),PER3=9aa(365-373),PER4=24aa(395-418),PER5=29aa(424-452),PER6=9aa(454-462),PER7=19aa(477-495),PER8=9aa(518-526),PER9=14aa(545-558),PER10=9aa(575-583),PER11=14aa(613-626),PER12=19aa(638-656),PER13=19aa(681-699),PER14=29aa(711-739),PER15=9aa(758-766),PER16=9aa(818-826),PER17=9aa(833-841),PER18=24aa(843-866),PER19=9aa(882-890),PER20=9aa(964-972),PER21=14aa(1015-10…	Family-wise	648.para.1	COL11A1;COL5A1;COL11A2;COL5A3;COL2A1;COL1A1;COL5A2;COL1A2;COL3A1;COL4A1;COL4A5;COL4A3;COL4A4;COL4A2;COL4A6;COL27A1;COL24A1	NO
	COL4A1	ENST00000375820.4	CCDS9511.1	1669	347	0.207909	25	PER1=9aa(283-291),PER2=19aa(444-462),PER3=9aa(473-481),PER4=24aa(503-526),PER5=29aa(539-567),PER6=9aa(569-577),PER7=19aa(609-627),PER8=9aa(663-671),PER9=14aa(692-705),PER10=9aa(722-730),PER11=14aa(774-787),PER12=19aa(804-822),PER13=16aa(849-864),PER14=29aa(876-904),PER15=9aa(923-931),PER16=9aa(992-1000),PER17=9aa(1007-1015),PER18=24aa(1029-1052),PER19=9aa(1076-1084),PER20=9aa(1158-1166),PER21=14a…	Family-wise	648.para.1	COL11A1;COL5A1;COL11A2;COL5A3;COL2A1;COL1A1;COL5A2;COL1A2;COL3A1;COL4A1;COL4A5;COL4A3;COL4A4;COL4A2;COL4A6;COL27A1;COL24A1	NO
	COL4A2	ENST00000360467.5	CCDS41907.1	1712	350	0.204439	25	PER1=9aa(301-309),PER2=19aa(461-479),PER3=9aa(493-501),PER4=24aa(523-546),PER5=29aa(555-583),PER6=9aa(585-593),PER7=19aa(624-642),PER8=9aa(701-709),PER9=14aa(731-744),PER10=9aa(761-769),PER11=14aa(816-829),PER12=19aa(844-862),PER13=19aa(887-905),PER14=29aa(917-945),PER15=9aa(967-975),PER16=9aa(1033-1041),PER17=9aa(1048-1056),PER18=24aa(1073-1096),PER19=9aa(1119-1127),PER20=9aa(1201-1209),PER21=14…	Family-wise	648.para.1	COL11A1;COL5A1;COL11A2;COL5A3;COL2A1;COL1A1;COL5A2;COL1A2;COL3A1;COL4A1;COL4A5;COL4A3;COL4A4;COL4A2;COL4A6;COL27A1;COL24A1	NO
	COL4A3	ENST00000396578.3	CCDS42829.1	1670	345	0.206587	25	PER1=9aa(293-301),PER2=19aa(453-471),PER3=9aa(483-491),PER4=24aa(513-536),PER5=29aa(549-577),PER6=9aa(579-587),PER7=19aa(619-637),PER8=9aa(673-681),PER9=14aa(702-715),PER10=9aa(732-740),PER11=14aa(784-797),PER12=19aa(814-832),PER13=16aa(859-874),PER14=29aa(886-914),PER15=9aa(933-941),PER16=9aa(996-1004),PER17=9aa(1011-1019),PER18=24aa(1033-1056),PER19=9aa(1080-1088),PER20=9aa(1162-1170),PER21=14a…	Family-wise	648.para.1	COL11A1;COL5A1;COL11A2;COL5A3;COL2A1;COL1A1;COL5A2;COL1A2;COL3A1;COL4A1;COL4A5;COL4A3;COL4A4;COL4A2;COL4A6;COL27A1;COL24A1	NO
	COL4A4	ENST00000396625.3	CCDS42828.1	1690	350	0.207101	25	PER1=9aa(307-315),PER2=19aa(467-485),PER3=9aa(502-510),PER4=24aa(532-555),PER5=29aa(564-592),PER6=9aa(594-602),PER7=19aa(633-651),PER8=9aa(688-696),PER9=14aa(718-731),PER10=9aa(747-755),PER11=14aa(802-815),PER12=19aa(830-848),PER13=19aa(873-891),PER14=29aa(903-931),PER15=9aa(950-958),PER16=9aa(1014-1022),PER17=9aa(1029-1037),PER18=24aa(1054-1077),PER19=9aa(1097-1105),PER20=9aa(1179-1187),PER21=14…	Family-wise	648.para.1	COL11A1;COL5A1;COL11A2;COL5A3;COL2A1;COL1A1;COL5A2;COL1A2;COL3A1;COL4A1;COL4A5;COL4A3;COL4A4;COL4A2;COL4A6;COL27A1;COL24A1	NO
	COL4A5	ENST00000328300.6	CCDS35366.1	1691	347	0.205204	25	PER1=9aa(294-302),PER2=19aa(458-476),PER3=9aa(493-501),PER4=24aa(523-546),PER5=29aa(556-584),PER6=9aa(586-594),PER7=19aa(626-644),PER8=9aa(680-688),PER9=14aa(709-722),PER10=9aa(739-747),PER11=14aa(791-804),PER12=19aa(821-839),PER13=16aa(866-881),PER14=29aa(893-921),PER15=9aa(940-948),PER16=9aa(1008-1016),PER17=9aa(1023-1031),PER18=24aa(1045-1068),PER19=9aa(1092-1100),PER20=9aa(1174-1182),PER21=14…	Family-wise	648.para.1	COL11A1;COL5A1;COL11A2;COL5A3;COL2A1;COL1A1;COL5A2;COL1A2;COL3A1;COL4A1;COL4A5;COL4A3;COL4A4;COL4A2;COL4A6;COL27A1;COL24A1	NO
	COL4A6	ENST00000372216.4	CCDS76010.1	1707	350	0.205038	25	PER1=9aa(298-306),PER2=19aa(456-474),PER3=9aa(490-498),PER4=24aa(520-543),PER5=29aa(552-580),PER6=9aa(582-590),PER7=19aa(621-639),PER8=9aa(694-702),PER9=14aa(724-737),PER10=9aa(754-762),PER11=14aa(809-822),PER12=19aa(837-855),PER13=19aa(880-898),PER14=29aa(910-938),PER15=9aa(960-968),PER16=9aa(1027-1035),PER17=9aa(1042-1050),PER18=24aa(1067-1090),PER19=9aa(1110-1118),PER20=9aa(1195-1203),PER21=14…	Family-wise	648.para.1	COL11A1;COL5A1;COL11A2;COL5A3;COL2A1;COL1A1;COL5A2;COL1A2;COL3A1;COL4A1;COL4A5;COL4A3;COL4A4;COL4A2;COL4A6;COL27A1;COL24A1	NO
	COL5A1	ENST00000371817.3	CCDS75932.1	1838	350	0.190424	25	PER1=9aa(588-596),PER2=19aa(719-737),PER3=9aa(744-752),PER4=24aa(774-797),PER5=29aa(803-831),PER6=9aa(833-841),PER7=19aa(856-874),PER8=9aa(897-905),PER9=14aa(924-937),PER10=9aa(954-962),PER11=14aa(998-1011),PER12=19aa(1023-1041),PER13=19aa(1060-1078),PER14=29aa(1090-1118),PER15=9aa(1137-1145),PER16=9aa(1197-1205),PER17=9aa(1212-1220),PER18=24aa(1222-1245),PER19=9aa(1258-1266),PER20=9aa(1337-1345)…	Family-wise	648.para.1	COL11A1;COL5A1;COL11A2;COL5A3;COL2A1;COL1A1;COL5A2;COL1A2;COL3A1;COL4A1;COL4A5;COL4A3;COL4A4;COL4A2;COL4A6;COL27A1;COL24A1	NO
	COL5A2	ENST00000374866.3	CCDS33350.1	1499	350	0.233489	25	PER1=9aa(248-256),PER2=19aa(376-394),PER3=9aa(401-409),PER4=24aa(431-454),PER5=29aa(460-488),PER6=9aa(490-498),PER7=19aa(513-531),PER8=9aa(554-562),PER9=14aa(581-594),PER10=9aa(611-619),PER11=14aa(649-662),PER12=19aa(674-692),PER13=19aa(717-735),PER14=29aa(747-775),PER15=9aa(794-802),PER16=9aa(854-862),PER17=9aa(869-877),PER18=24aa(879-902),PER19=9aa(918-926),PER20=9aa(1000-1008),PER21=14aa(1051-…	Family-wise	648.para.1	COL11A1;COL5A1;COL11A2;COL5A3;COL2A1;COL1A1;COL5A2;COL1A2;COL3A1;COL4A1;COL4A5;COL4A3;COL4A4;COL4A2;COL4A6;COL27A1;COL24A1	NO
	COL5A3	ENST00000264828.3	CCDS12222.1	1745	350	0.200573	25	PER1=9aa(508-516),PER2=19aa(639-657),PER3=9aa(664-672),PER4=24aa(694-717),PER5=29aa(723-751),PER6=9aa(753-761),PER7=19aa(776-794),PER8=9aa(817-825),PER9=14aa(844-857),PER10=9aa(874-882),PER11=14aa(918-931),PER12=19aa(943-961),PER13=19aa(980-998),PER14=29aa(1010-1038),PER15=9aa(1057-1065),PER16=9aa(1117-1125),PER17=9aa(1132-1140),PER18=24aa(1142-1165),PER19=9aa(1178-1186),PER20=9aa(1257-1265),PER2…	Family-wise	648.para.1	COL11A1;COL5A1;COL11A2;COL5A3;COL2A1;COL1A1;COL5A2;COL1A2;COL3A1;COL4A1;COL4A5;COL4A3;COL4A4;COL4A2;COL4A6;COL27A1;COL24A1	NO
	COL6A1	ENST00000361866.3	CCDS13727.1	1028	33	0.0321012	2	PER1=24aa(269-292),PER2=9aa(294-302)	Family-wise	533.para.1	COL6A2;COL6A1	NO
	COL6A2	ENST00000300527.4	CCDS13728.1	1019	33	0.0323847	2	PER1=24aa(268-291),PER2=9aa(293-301)	Family-wise	533.para.1	COL6A2;COL6A1	NO
	COL8A1	ENST00000261037.3	CCDS2934.1	744	9	0.0120968	1	PER1=9aa(658-666)	Family-wise	1854.para.1	COL8A2;COL8A1;COL10A1	NO
	COL8A2	ENST00000397799.1	CCDS403.1	703	9	0.0128023	1	PER1=9aa(617-625)	Family-wise	1854.para.1	COL8A2;COL8A1;COL10A1	NO
	CPA1	ENST00000011292.3	CCDS5820.1	419	9	0.0214797	1	PER1=9aa(247-255)	Family-wise	2631.para.1	CPB1;CPA3;CPA2;CPA4;CPA1;CPA5;CPB2;CPA6	NO
	CPA2	ENST00000222481.4	CCDS5817.2	419	9	0.0214797	1	PER1=9aa(247-255)	Family-wise	2631.para.1	CPB1;CPA3;CPA2;CPA4;CPA1;CPA5;CPB2;CPA6	NO
	CPA3	ENST00000296046.3	CCDS3138.1	417	9	0.0215827	1	PER1=9aa(244-252)	Family-wise	2631.para.1	CPB1;CPA3;CPA2;CPA4;CPA1;CPA5;CPB2;CPA6	NO
	CPA4	ENST00000222482.4	CCDS5818.1	421	9	0.0213777	1	PER1=9aa(249-257)	Family-wise	2631.para.1	CPB1;CPA3;CPA2;CPA4;CPA1;CPA5;CPB2;CPA6	NO
	CPA5	ENST00000485477.1	CCDS5819.1	436	9	0.0206422	1	PER1=9aa(264-272)	Family-wise	2631.para.1	CPB1;CPA3;CPA2;CPA4;CPA1;CPA5;CPB2;CPA6	NO
	CPA6	ENST00000297770.4	CCDS6200.1	437	9	0.020595	1	PER1=9aa(264-272)	Family-wise	2631.para.1	CPB1;CPA3;CPA2;CPA4;CPA1;CPA5;CPB2;CPA6	NO
	CPB1	ENST00000491148.1	CCDS33874.1	417	9	0.0215827	1	PER1=9aa(244-252)	Family-wise	2631.para.1	CPB1;CPA3;CPA2;CPA4;CPA1;CPA5;CPB2;CPA6	NO
	CPB2	ENST00000181383.4	CCDS9401.1	423	9	0.0212766	1	PER1=9aa(249-257)	Family-wise	2631.para.1	CPB1;CPA3;CPA2;CPA4;CPA1;CPA5;CPB2;CPA6	NO
	CPT1A	ENST00000265641.5	CCDS8185.1	773	16	0.0206986	2	PER1=8aa(244-251),PER2=8aa(450-457)	Family-wise	455.para.1	CHAT;CRAT;CROT;CPT1A;CPT1B;CPT1C	NO
	CPT1B	ENST00000360719.2	CCDS14098.1	772	16	0.0207254	2	PER1=8aa(246-253),PER2=8aa(450-457)	Family-wise	455.para.1	CHAT;CRAT;CROT;CPT1A;CPT1B;CPT1C	NO
	CPT1C	ENST00000392518.4	CCDS12779.1	803	16	0.0199253	2	PER1=8aa(244-251),PER2=8aa(447-454)	Family-wise	455.para.1	CHAT;CRAT;CROT;CPT1A;CPT1B;CPT1C	NO
	CRAT	ENST00000318080.2	CCDS6919.1	626	17	0.0271565	2	PER1=8aa(110-117),PER2=9aa(319-327)	Family-wise	455.para.1	CHAT;CRAT;CROT;CPT1A;CPT1B;CPT1C	NO
	CROT	ENST00000419147.2	CCDS47634.1	640	17	0.0265625	2	PER1=9aa(121-129),PER2=8aa(332-339)	Family-wise	455.para.1	CHAT;CRAT;CROT;CPT1A;CPT1B;CPT1C	NO
	CRX	ENST00000221996.7	CCDS12706.1	299	24	0.0802676	1	PER1=24aa(75-98)	Family-wise	719.para.2	OTX1;OTX2;CRX;DMBX1	NO
	CRYAA	ENST00000291554.2	CCDS13695.1	173	14	0.0809249	1	PER1=14aa(108-121)	Family-wise	3433.para.1	CRYAB;CRYAA;HSPB6;HSPB1;HSPB8;HSPB2;HSPB3	NO
	CRYAB	ENST00000533475.1	CCDS8351.1	175	14	0.08	1	PER1=14aa(112-125)	Family-wise	3433.para.1	CRYAB;CRYAA;HSPB6;HSPB1;HSPB8;HSPB2;HSPB3	NO
	CRYBA1	ENST00000225387.3	CCDS11249.1	215	21	0.0976744	2	PER1=9aa(67-75),PER2=12aa(204-215)	Family-wise	1885.para.1	CRYBB2;CRYBB3;CRYBB1;CRYBA1;CRYBA4;CRYBA2;CRYGC;CRYGB;CRYGA;CRYGD;CRYGS;CRYGN	NO
	CRYBA2	ENST00000295728.2	CCDS2429.1	197	21	0.106599	2	PER1=9aa(49-57),PER2=12aa(186-197)	Family-wise	1885.para.1	CRYBB2;CRYBB3;CRYBB1;CRYBA1;CRYBA4;CRYBA2;CRYGC;CRYGB;CRYGA;CRYGD;CRYGS;CRYGN	NO
	CRYBA4	ENST00000354760.3	CCDS13841.1	196	21	0.107143	2	PER1=9aa(48-56),PER2=12aa(185-196)	Family-wise	1885.para.1	CRYBB2;CRYBB3;CRYBB1;CRYBA1;CRYBA4;CRYBA2;CRYGC;CRYGB;CRYGA;CRYGD;CRYGS;CRYGN	NO
	CRYBB1	ENST00000215939.2	CCDS13840.1	252	21	0.0833333	2	PER1=9aa(95-103),PER2=12aa(225-236)	Family-wise	1885.para.1	CRYBB2;CRYBB3;CRYBB1;CRYBA1;CRYBA4;CRYBA2;CRYGC;CRYGB;CRYGA;CRYGD;CRYGS;CRYGN	NO
	CRYBB2	ENST00000398215.2	CCDS13831.1	205	21	0.102439	2	PER1=9aa(53-61),PER2=12aa(183-194)	Family-wise	1885.para.1	CRYBB2;CRYBB3;CRYBB1;CRYBA1;CRYBA4;CRYBA2;CRYGC;CRYGB;CRYGA;CRYGD;CRYGS;CRYGN	NO
	CRYBB3	ENST00000215855.2	CCDS13830.1	211	21	0.0995261	2	PER1=9aa(60-68),PER2=12aa(190-201)	Family-wise	1885.para.1	CRYBB2;CRYBB3;CRYBB1;CRYBA1;CRYBA4;CRYBA2;CRYGC;CRYGB;CRYGA;CRYGD;CRYGS;CRYGN	NO
	CRYGA	ENST00000304502.4	CCDS33367.1	174	21	0.12069	2	PER1=9aa(37-45),PER2=12aa(163-174)	Family-wise	1885.para.1	CRYBB2;CRYBB3;CRYBB1;CRYBA1;CRYBA4;CRYBA2;CRYGC;CRYGB;CRYGA;CRYGD;CRYGS;CRYGN	NO
	CRYGB	ENST00000260988.4	CCDS2380.1	175	21	0.12	2	PER1=9aa(37-45),PER2=12aa(164-175)	Family-wise	1885.para.1	CRYBB2;CRYBB3;CRYBB1;CRYBA1;CRYBA4;CRYBA2;CRYGC;CRYGB;CRYGA;CRYGD;CRYGS;CRYGN	NO
	CRYGC	ENST00000282141.3	CCDS2379.1	174	21	0.12069	2	PER1=9aa(37-45),PER2=12aa(163-174)	Family-wise	1885.para.1	CRYBB2;CRYBB3;CRYBB1;CRYBA1;CRYBA4;CRYBA2;CRYGC;CRYGB;CRYGA;CRYGD;CRYGS;CRYGN	NO
	CRYGD	ENST00000264376.4	CCDS2378.1	174	21	0.12069	2	PER1=9aa(37-45),PER2=12aa(163-174)	Family-wise	1885.para.1	CRYBB2;CRYBB3;CRYBB1;CRYBA1;CRYBA4;CRYBA2;CRYGC;CRYGB;CRYGA;CRYGD;CRYGS;CRYGN	NO
	CRYGN	ENST00000337323.2	CCDS5926.1	182	16	0.0879121	2	PER1=9aa(43-51),PER2=7aa(176-182)	Family-wise	1885.para.1	CRYBB2;CRYBB3;CRYBB1;CRYBA1;CRYBA4;CRYBA2;CRYGC;CRYGB;CRYGA;CRYGD;CRYGS;CRYGN	NO
	CRYGS	ENST00000392499.2	CCDS3275.1	178	19	0.106742	2	PER1=9aa(41-49),PER2=10aa(169-178)	Family-wise	1885.para.1	CRYBB2;CRYBB3;CRYBB1;CRYBA1;CRYBA4;CRYBA2;CRYGC;CRYGB;CRYGA;CRYGD;CRYGS;CRYGN	NO
	CSF3R	ENST00000373103.1	CCDS414.1	863	9	0.0104287	1	PER1=9aa(610-618)	Family-wise	2070.para.2	IL31RA;CSF3R;IL6ST;IL12RB2	NO
	CSNK2A1	ENST00000217244.3	CCDS13003.1	391	9	0.0230179	1	PER1=9aa(170-178)	Family-wise	1202.para.1	CSNK2A3;CSNK2A1;CSNK2A2	NO
	CSNK2A2	ENST00000262506.3	CCDS10794.1	350	9	0.0257143	1	PER1=9aa(171-179)	Family-wise	1202.para.1	CSNK2A3;CSNK2A1;CSNK2A2	NO
	CSNK2A3	ENST00000528848.2	CCDS59224.1	391	9	0.0230179	1	PER1=9aa(170-178)	Family-wise	1202.para.1	CSNK2A3;CSNK2A1;CSNK2A2	NO
	CYP11A1	ENST00000268053.6	CCDS32291.1	521	23	0.0441459	2	PER1=14aa(324-337),PER2=9aa(452-460)	Family-wise	3032.para.1	CYP11B2;CYP11B1;CYP11A1;CYP27B1;CYP27A1;CYP24A1	NO
	CYP11B1	ENST00000292427.4	CCDS6392.1	503	23	0.0457256	2	PER1=14aa(312-325),PER2=9aa(440-448)	Family-wise	3032.para.1	CYP11B2;CYP11B1;CYP11A1;CYP27B1;CYP27A1;CYP24A1	NO
	CYP11B2	ENST00000323110.2	CCDS6393.1	503	23	0.0457256	2	PER1=14aa(312-325),PER2=9aa(440-448)	Family-wise	3032.para.1	CYP11B2;CYP11B1;CYP11A1;CYP27B1;CYP27A1;CYP24A1	NO
	CYP24A1	ENST00000216862.3	CCDS33491.1	514	23	0.0447471	2	PER1=14aa(324-337),PER2=9aa(452-460)	Family-wise	3032.para.1	CYP11B2;CYP11B1;CYP11A1;CYP27B1;CYP27A1;CYP24A1	NO
	CYP27A1	ENST00000258415.4	CCDS2423.1	531	23	0.0433145	2	PER1=14aa(333-346),PER2=9aa(466-474)	Family-wise	3032.para.1	CYP11B2;CYP11B1;CYP11A1;CYP27B1;CYP27A1;CYP24A1	NO
	CYP27B1	ENST00000228606.4	CCDS8954.1	508	23	0.0452756	2	PER1=14aa(315-328),PER2=9aa(445-453)	Family-wise	3032.para.1	CYP11B2;CYP11B1;CYP11A1;CYP27B1;CYP27A1;CYP24A1	NO
	DAW1	ENST00000309931.2	CCDS2470.1	415	7	0.0168675	1	PER1=7aa(192-198)	Family-wise	359.para.1	WDR5B;WDR5;PAFAH1B1;DAW1;SNRNP40;POC1A;POC1B;PRPF4;WDR38;WDR61;SMU1	NO
	DBT	ENST00000370132.4	CCDS767.1	482	9	0.0186722	1	PER1=9aa(397-405)	Family-wise	1565.para.1	DBT;DLST	NO
	DEAF1	ENST00000382409.3	CCDS31327.1	565	14	0.0247788	1	PER1=14aa(219-232)	Family-wise	2365.para.1	RUNX1T1;CBFA2T3;CBFA2T2;DEAF1	NO
	DES	ENST00000373960.3	CCDS33383.1	470	47	0.1	3	PER1=24aa(104-127),PER2=14aa(393-406),PER3=9aa(408-416)	Family-wise	116.para.2	VIM;DES;PRPH;GFAP;INA;NEFL	NO
	DHRS12	ENST00000444610.2	CCDS58292.1	317	9	0.0283912	1	PER1=9aa(201-209)	Family-wise	567.para.1	RDH11;RDH12;RDH13;RDH14;DHRS13;DHRS12	NO
	DHRS13	ENST00000378895.4	CCDS11246.2	377	9	0.0238727	1	PER1=9aa(197-205)	Family-wise	567.para.1	RDH11;RDH12;RDH13;RDH14;DHRS13;DHRS12	NO
	DHRS7	ENST00000216500.5	CCDS9743.1	339	9	0.0265487	1	PER1=9aa(201-209)	Family-wise	1183.para.1	HSD11B2;HSD17B2;RDH16;HSD17B6;RDH5;SDR9C7;DHRS9;BDH1;HSD17B1;RDH8;DHRS7C;DHRS7B;DHRS7;KDSR	NO
	DHRS7B	ENST00000395511.3	CCDS11215.1	325	9	0.0276923	1	PER1=9aa(205-213)	Family-wise	1183.para.1	HSD11B2;HSD17B2;RDH16;HSD17B6;RDH5;SDR9C7;DHRS9;BDH1;HSD17B1;RDH8;DHRS7C;DHRS7B;DHRS7;KDSR	NO
	DHRS7C	ENST00000330255.5	CCDS56020.1	312	9	0.0288462	1	PER1=9aa(190-198)	Family-wise	1183.para.1	HSD11B2;HSD17B2;RDH16;HSD17B6;RDH5;SDR9C7;DHRS9;BDH1;HSD17B1;RDH8;DHRS7C;DHRS7B;DHRS7;KDSR	NO
	DHRS9	ENST00000327239.4	CCDS74600.1	379	9	0.0237467	1	PER1=9aa(234-242)	Family-wise	1183.para.1	HSD11B2;HSD17B2;RDH16;HSD17B6;RDH5;SDR9C7;DHRS9;BDH1;HSD17B1;RDH8;DHRS7C;DHRS7B;DHRS7;KDSR	NO
	DHX29	ENST00000251636.5	CCDS34158.1	1369	9	0.00657414	1	PER1=9aa(977-985)	Family-wise	1806.para.1	DHX57;DHX29;DHX30	NO
	DHX57	ENST00000295373.6	CCDS1800.1	1386	9	0.00649351	1	PER1=9aa(960-968)	Family-wise	1806.para.1	DHX57;DHX29;DHX30	NO
	DLST	ENST00000334220.4	CCDS9833.1	453	9	0.0198675	1	PER1=9aa(370-378)	Family-wise	1565.para.1	DBT;DLST	NO
	DLX1	ENST00000361725.4	CCDS2247.2	255	14	0.054902	1	PER1=14aa(169-182)	Family-wise	1130.para.1	DLX3;DLX5;DLX2;DLX1;DLX6;DLX4;MSX1;MSX2	NO
	DLX2	ENST00000234198.4	CCDS2248.1	328	14	0.0426829	1	PER1=14aa(193-206)	Family-wise	1130.para.1	DLX3;DLX5;DLX2;DLX1;DLX6;DLX4;MSX1;MSX2	NO
	DLX3	ENST00000434704.2	CCDS11556.1	287	14	0.0487805	1	PER1=14aa(170-183)	Family-wise	1130.para.1	DLX3;DLX5;DLX2;DLX1;DLX6;DLX4;MSX1;MSX2	NO
	DLX4	ENST00000240306.3	CCDS11555.1	240	14	0.0583333	1	PER1=14aa(158-171)	Family-wise	1130.para.1	DLX3;DLX5;DLX2;DLX1;DLX6;DLX4;MSX1;MSX2	NO
	DLX5	ENST00000222598.4	CCDS5647.1	289	14	0.0484429	1	PER1=14aa(178-191)	Family-wise	1130.para.1	DLX3;DLX5;DLX2;DLX1;DLX6;DLX4;MSX1;MSX2	NO
	DLX6	ENST00000518156.2	CCDS47647.2	293	14	0.0477816	1	PER1=14aa(208-221)	Family-wise	1130.para.1	DLX3;DLX5;DLX2;DLX1;DLX6;DLX4;MSX1;MSX2	NO
	DMBX1	ENST00000360032.3	CCDS536.1	377	24	0.0636605	1	PER1=24aa(102-125)	Family-wise	719.para.2	OTX1;OTX2;CRX;DMBX1	NO
	DNAH1	ENST00000420323.2	CCDS46842.1	4265	9	0.0021102	1	PER1=9aa(3165-3173)	Family-wise	787.para.1	DNAH7;DNAH3;DNAH1;DNAH6;DNAH2;DNAH10;DNAH11;DNAH9;DNAH8;DNAH5;DYNC1H1	NO
	DNAH10	ENST00000409039.3	CCDS9255.2	4471	9	0.00201297	1	PER1=9aa(3366-3374)	Family-wise	787.para.1	DNAH7;DNAH3;DNAH1;DNAH6;DNAH2;DNAH10;DNAH11;DNAH9;DNAH8;DNAH5;DYNC1H1	NO
	DNAH11	#N/A	CCDS64602.1	4516	9	0.00199291	1	PER1=9aa(3425-3433)	Family-wise	787.para.1	DNAH7;DNAH3;DNAH1;DNAH6;DNAH2;DNAH10;DNAH11;DNAH9;DNAH8;DNAH5;DYNC1H1	NO
	DNAH2	ENST00000572933.1	CCDS32551.1	4427	9	0.00203298	1	PER1=9aa(3325-3333)	Family-wise	787.para.1	DNAH7;DNAH3;DNAH1;DNAH6;DNAH2;DNAH10;DNAH11;DNAH9;DNAH8;DNAH5;DYNC1H1	NO
	DNAH3	ENST00000261383.3	CCDS10594.1	4116	9	0.00218659	1	PER1=9aa(3013-3021)	Family-wise	787.para.1	DNAH7;DNAH3;DNAH1;DNAH6;DNAH2;DNAH10;DNAH11;DNAH9;DNAH8;DNAH5;DYNC1H1	NO
	DNAH5	ENST00000265104.4	CCDS3882.1	4624	9	0.00194637	1	PER1=9aa(3535-3543)	Family-wise	787.para.1	DNAH7;DNAH3;DNAH1;DNAH6;DNAH2;DNAH10;DNAH11;DNAH9;DNAH8;DNAH5;DYNC1H1	NO
	DNAH6	ENST00000389394.3	CCDS46348.1	4158	9	0.0021645	1	PER1=9aa(3010-3018)	Family-wise	787.para.1	DNAH7;DNAH3;DNAH1;DNAH6;DNAH2;DNAH10;DNAH11;DNAH9;DNAH8;DNAH5;DYNC1H1	NO
	DNAH7	ENST00000312428.6	CCDS42794.1	4024	9	0.00223658	1	PER1=9aa(2922-2930)	Family-wise	787.para.1	DNAH7;DNAH3;DNAH1;DNAH6;DNAH2;DNAH10;DNAH11;DNAH9;DNAH8;DNAH5;DYNC1H1	NO
	DNAH8	ENST00000359357.3	CCDS75447.1	4707	9	0.00191205	1	PER1=9aa(3616-3624)	Family-wise	787.para.1	DNAH7;DNAH3;DNAH1;DNAH6;DNAH2;DNAH10;DNAH11;DNAH9;DNAH8;DNAH5;DYNC1H1	NO
	DNAH9	ENST00000262442.4	CCDS11160.1	4486	9	0.00200624	1	PER1=9aa(3394-3402)	Family-wise	787.para.1	DNAH7;DNAH3;DNAH1;DNAH6;DNAH2;DNAH10;DNAH11;DNAH9;DNAH8;DNAH5;DYNC1H1	NO
	DNAJB1	ENST00000254322.2	CCDS12312.1	340	14	0.0411765	1	PER1=14aa(90-103)	Family-wise	2341.para.1	DNAJB4;DNAJB1;DNAJB13;DNAJB6;DNAJB7;DNAJB2	NO
	DNAJB13	ENST00000339764.1	CCDS8227.1	316	14	0.0443038	1	PER1=14aa(88-101)	Family-wise	2341.para.1	DNAJB4;DNAJB1;DNAJB13;DNAJB6;DNAJB7;DNAJB2	NO
	DNAJB2	ENST00000336576.5	CCDS2439.1	324	13	0.0401235	1	PER1=13aa(92-104)	Family-wise	2341.para.1	DNAJB4;DNAJB1;DNAJB13;DNAJB6;DNAJB7;DNAJB2	NO
	DNAJB4	ENST00000370763.5	CCDS684.1	337	14	0.041543	1	PER1=14aa(86-99)	Family-wise	2341.para.1	DNAJB4;DNAJB1;DNAJB13;DNAJB6;DNAJB7;DNAJB2	NO
	DNAJB7	ENST00000307221.4	CCDS14008.1	309	13	0.0420712	1	PER1=13aa(86-98)	Family-wise	2341.para.1	DNAJB4;DNAJB1;DNAJB13;DNAJB6;DNAJB7;DNAJB2	NO
	DNASE2	ENST00000222219.3	CCDS12284.1	360	9	0.025	1	PER1=9aa(115-123)	Family-wise	2903.para.1	DNASE2;DNASE2B	NO
	DNASE2B	ENST00000370665.3	CCDS44167.1	361	9	0.0249307	1	PER1=9aa(128-136)	Family-wise	2903.para.1	DNASE2;DNASE2B	NO
	DNM1	ENST00000372923.3	CCDS75912.1	864	46	0.0532407	4	PER1=14aa(36-49),PER2=14aa(352-365),PER3=9aa(367-375),PER4=9aa(533-541)	Family-wise	3079.para.1	DNM2;DNM1;DNM3;DNM1L	NO
	DNM1L	ENST00000549701.1	CCDS61095.1	749	46	0.0614152	4	PER1=14aa(30-43),PER2=14aa(369-382),PER3=9aa(384-392),PER4=9aa(552-560)	Family-wise	3079.para.1	DNM2;DNM1;DNM3;DNM1L	NO
	DNM2	ENST00000389253.4	CCDS45969.1	870	46	0.0528736	4	PER1=14aa(36-49),PER2=14aa(352-365),PER3=9aa(367-375),PER4=9aa(533-541)	Family-wise	3079.para.1	DNM2;DNM1;DNM3;DNM1L	NO
	DNM3	ENST00000358155.4	CCDS53431.1	863	46	0.0533024	4	PER1=14aa(36-49),PER2=14aa(352-365),PER3=9aa(367-375),PER4=9aa(529-537)	Family-wise	3079.para.1	DNM2;DNM1;DNM3;DNM1L	NO
	DST	ENST00000244364.6	CCDS75474.1	5537	8	0.00144483	1	PER1=8aa(5297-5304)	Family-wise	1591.para.1	DST;MACF1;EPPK1	NO
	DYNC1H1	ENST00000360184.4	CCDS9966.1	4646	9	0.00193715	1	PER1=9aa(3521-3529)	Family-wise	787.para.1	DNAH7;DNAH3;DNAH1;DNAH6;DNAH2;DNAH10;DNAH11;DNAH9;DNAH8;DNAH5;DYNC1H1	NO
	DZIP1	ENST00000347108.3	CCDS9478.1	867	9	0.0103806	1	PER1=9aa(121-129)	Family-wise	1091.para.1	DZIP1L;DZIP1	NO
	DZIP1L	ENST00000327532.2	CCDS3096.1	767	9	0.011734	1	PER1=9aa(87-95)	Family-wise	1091.para.1	DZIP1L;DZIP1	NO
	ECE1	ENST00000374893.6	CCDS215.1	770	9	0.0116883	1	PER1=9aa(670-678)	Family-wise	2595.para.1	MMEL1;MME;ECE1;ECE2;PHEX;ECEL1;KEL	NO
	ECE2	ENST00000402825.3	CCDS3256.2	883	9	0.0101925	1	PER1=9aa(783-791)	Family-wise	2595.para.1	MMEL1;MME;ECE1;ECE2;PHEX;ECEL1;KEL	NO
	ECEL1	ENST00000304546.1	CCDS2493.1	775	9	0.0116129	1	PER1=9aa(675-683)	Family-wise	2595.para.1	MMEL1;MME;ECE1;ECE2;PHEX;ECEL1;KEL	NO
	EEF2	ENST00000309311.6	CCDS12117.1	858	9	0.0104895	1	PER1=9aa(592-600)	Family-wise	1322.para.1	EEF2;EFTUD2	NO
	EFNB1	ENST00000204961.4	CCDS14391.1	346	23	0.066474	2	PER1=14aa(110-123),PER2=9aa(150-158)	Family-wise	1368.para.1	EFNB2;EFNB1;EFNB3	NO
	EFNB2	ENST00000245323.4	CCDS9507.1	333	23	0.0690691	2	PER1=14aa(110-123),PER2=9aa(150-158)	Family-wise	1368.para.1	EFNB2;EFNB1;EFNB3	NO
	EFNB3	ENST00000226091.2	CCDS11120.1	340	23	0.0676471	2	PER1=14aa(113-126),PER2=9aa(153-161)	Family-wise	1368.para.1	EFNB2;EFNB1;EFNB3	NO
	EFTUD2	ENST00000426333.2	CCDS11489.1	972	9	0.00925926	1	PER1=9aa(675-683)	Family-wise	1322.para.1	EEF2;EFTUD2	NO
	EGFR	ENST00000275493.2	CCDS5514.1	1210	9	0.00743802	1	PER1=9aa(745-753)	Family-wise	682.para.3	ERBB4;EGFR;ERBB2;ERBB3	NO
	EOMES	ENST00000295743.4	CCDS63585.1	705	9	0.012766	1	PER1=9aa(447-455)	Family-wise	943.para.1	TBR1;EOMES	NO
	EP300	ENST00000263253.7	CCDS14010.1	2414	23	0.00952775	2	PER1=9aa(1410-1418),PER2=14aa(1824-1837)	Family-wise	3425.para.1	EP300;CREBBP	NO
	EPB41	ENST00000343067.4	CCDS53288.1	864	23	0.0266204	2	PER1=9aa(434-442),PER2=14aa(472-485)	Family-wise	687.para.2	EPB41L4B;EPB41L5;EPB41L4A;EPB41L3;EPB41;EPB41L2;EPB41L1;FARP2;FARP1;FRMD7;PTPN4;PTPN3	NO
	EPB41L1	ENST00000338074.2	CCDS13271.1	881	23	0.0261067	2	PER1=9aa(321-329),PER2=14aa(359-372)	Family-wise	687.para.2	EPB41L4B;EPB41L5;EPB41L4A;EPB41L3;EPB41;EPB41L2;EPB41L1;FARP2;FARP1;FRMD7;PTPN4;PTPN3	NO
	EPB41L2	ENST00000337057.3	CCDS5141.1	1005	23	0.0228856	2	PER1=9aa(442-450),PER2=14aa(480-493)	Family-wise	687.para.2	EPB41L4B;EPB41L5;EPB41L4A;EPB41L3;EPB41;EPB41L2;EPB41L1;FARP2;FARP1;FRMD7;PTPN4;PTPN3	NO
	EPB41L3	ENST00000341928.2	CCDS11838.1	1087	23	0.0211592	2	PER1=9aa(334-342),PER2=14aa(372-385)	Family-wise	687.para.2	EPB41L4B;EPB41L5;EPB41L4A;EPB41L3;EPB41;EPB41L2;EPB41L1;FARP2;FARP1;FRMD7;PTPN4;PTPN3	NO
	EPB41L4A	ENST00000261486.5	CCDS43350.1	686	23	0.0335277	2	PER1=9aa(244-252),PER2=14aa(280-293)	Family-wise	687.para.2	EPB41L4B;EPB41L5;EPB41L4A;EPB41L3;EPB41;EPB41L2;EPB41L1;FARP2;FARP1;FRMD7;PTPN4;PTPN3	NO
	EPB41L4B	ENST00000374566.3	CCDS43859.1	900	23	0.0255556	2	PER1=9aa(310-318),PER2=14aa(350-363)	Family-wise	687.para.2	EPB41L4B;EPB41L5;EPB41L4A;EPB41L3;EPB41;EPB41L2;EPB41L1;FARP2;FARP1;FRMD7;PTPN4;PTPN3	NO
	EPB41L5	ENST00000263713.5	CCDS2130.1	733	23	0.0313779	2	PER1=9aa(268-276),PER2=14aa(308-321)	Family-wise	687.para.2	EPB41L4B;EPB41L5;EPB41L4A;EPB41L3;EPB41;EPB41L2;EPB41L1;FARP2;FARP1;FRMD7;PTPN4;PTPN3	NO
	EPB42	ENST00000300215.3	CCDS10093.1	721	27	0.037448	3	PER1=9aa(205-213),PER2=9aa(302-310),PER3=9aa(352-360)	Family-wise	1294.para.1	TGM1;F13A1;TGM4;TGM7;TGM5;TGM6;TGM3;TGM2;EPB42	NO
	EPCAM	ENST00000263735.4	CCDS1833.1	314	9	0.0286624	1	PER1=9aa(102-110)	Family-wise	2852.para.1	TACSTD2;EPCAM	NO
	EPHA1	ENST00000275815.3	CCDS5884.1	976	9	0.00922131	1	PER1=9aa(746-754)	Family-wise	1025.para.1	EPHA3;EPHA5;EPHA4;EPHA7;EPHA6;EPHA8;EPHB2;EPHB1;EPHB3;EPHB4;EPHA10;EPHA2;EPHA1;EPHB6	NO
	EPHA10	ENST00000373048.4	CCDS41305.1	1008	9	0.00892857	1	PER1=9aa(767-775)	Family-wise	1025.para.1	EPHA3;EPHA5;EPHA4;EPHA7;EPHA6;EPHA8;EPHB2;EPHB1;EPHB3;EPHB4;EPHA10;EPHA2;EPHA1;EPHB6	NO
	EPHA2	ENST00000358432.5	CCDS169.1	976	9	0.00922131	1	PER1=9aa(736-744)	Family-wise	1025.para.1	EPHA3;EPHA5;EPHA4;EPHA7;EPHA6;EPHA8;EPHB2;EPHB1;EPHB3;EPHB4;EPHA10;EPHA2;EPHA1;EPHB6	NO
	EPHA3	ENST00000336596.2	CCDS2922.1	983	9	0.00915565	1	PER1=9aa(743-751)	Family-wise	1025.para.1	EPHA3;EPHA5;EPHA4;EPHA7;EPHA6;EPHA8;EPHB2;EPHB1;EPHB3;EPHB4;EPHA10;EPHA2;EPHA1;EPHB6	NO
	EPHA4	ENST00000281821.2	CCDS2447.1	986	9	0.00912779	1	PER1=9aa(743-751)	Family-wise	1025.para.1	EPHA3;EPHA5;EPHA4;EPHA7;EPHA6;EPHA8;EPHB2;EPHB1;EPHB3;EPHB4;EPHA10;EPHA2;EPHA1;EPHB6	NO
	EPHA5	ENST00000273854.3	CCDS75133.1	1038	9	0.00867052	1	PER1=9aa(798-806)	Family-wise	1025.para.1	EPHA3;EPHA5;EPHA4;EPHA7;EPHA6;EPHA8;EPHB2;EPHB1;EPHB3;EPHB4;EPHA10;EPHA2;EPHA1;EPHB6	NO
	EPHA6	ENST00000389672.5	CCDS46876.1	1130	9	0.0079646	1	PER1=9aa(889-897)	Family-wise	1025.para.1	EPHA3;EPHA5;EPHA4;EPHA7;EPHA6;EPHA8;EPHB2;EPHB1;EPHB3;EPHB4;EPHA10;EPHA2;EPHA1;EPHB6	NO
	EPHA7	ENST00000369303.4	CCDS5031.1	998	9	0.00901804	1	PER1=9aa(755-763)	Family-wise	1025.para.1	EPHA3;EPHA5;EPHA4;EPHA7;EPHA6;EPHA8;EPHB2;EPHB1;EPHB3;EPHB4;EPHA10;EPHA2;EPHA1;EPHB6	NO
	EPHA8	ENST00000166244.3	CCDS225.1	1005	9	0.00895522	1	PER1=9aa(757-765)	Family-wise	1025.para.1	EPHA3;EPHA5;EPHA4;EPHA7;EPHA6;EPHA8;EPHB2;EPHB1;EPHB3;EPHB4;EPHA10;EPHA2;EPHA1;EPHB6	NO
	EPHB1	ENST00000398015.3	CCDS46921.1	984	9	0.00914634	1	PER1=9aa(741-749)	Family-wise	1025.para.1	EPHA3;EPHA5;EPHA4;EPHA7;EPHA6;EPHA8;EPHB2;EPHB1;EPHB3;EPHB4;EPHA10;EPHA2;EPHA1;EPHB6	NO
	EPHB2	ENST00000374632.3	CCDS230.1	987	9	0.00911854	1	PER1=9aa(744-752)	Family-wise	1025.para.1	EPHA3;EPHA5;EPHA4;EPHA7;EPHA6;EPHA8;EPHB2;EPHB1;EPHB3;EPHB4;EPHA10;EPHA2;EPHA1;EPHB6	NO
	EPHB3	ENST00000330394.2	CCDS3268.1	998	9	0.00901804	1	PER1=9aa(755-763)	Family-wise	1025.para.1	EPHA3;EPHA5;EPHA4;EPHA7;EPHA6;EPHA8;EPHB2;EPHB1;EPHB3;EPHB4;EPHA10;EPHA2;EPHA1;EPHB6	NO
	EPHB4	ENST00000358173.3	CCDS5706.1	987	9	0.00911854	1	PER1=9aa(737-745)	Family-wise	1025.para.1	EPHA3;EPHA5;EPHA4;EPHA7;EPHA6;EPHA8;EPHB2;EPHB1;EPHB3;EPHB4;EPHA10;EPHA2;EPHA1;EPHB6	NO
	EPHB6	ENST00000392957.2	CCDS5873.2	1022	9	0.00880626	1	PER1=9aa(793-801)	Family-wise	1025.para.1	EPHA3;EPHA5;EPHA4;EPHA7;EPHA6;EPHA8;EPHB2;EPHB1;EPHB3;EPHB4;EPHA10;EPHA2;EPHA1;EPHB6	NO
	EPPK1	ENST00000525985.1	CCDS75800.1	5088	7	0.00137579	1	PER1=7aa(4938-4944)	Family-wise	1591.para.1	DST;MACF1;EPPK1	NO
	ERAS	ENST00000338270.1	CCDS35246.1	233	33	0.141631	2	PER1=19aa(46-64),PER2=14aa(91-104)	Family-wise	3537.para.2	RRAS2;RRAS;MRAS;NRAS;KRAS;HRAS;RALB;RALA;ERAS	NO
	ERBB2	ENST00000269571.5	CCDS32642.1	1255	9	0.00717131	1	PER1=9aa(753-761)	Family-wise	682.para.3	ERBB4;EGFR;ERBB2;ERBB3	NO
	ERBB3	ENST00000267101.3	CCDS31833.1	1342	9	0.00670641	1	PER1=9aa(742-750)	Family-wise	682.para.3	ERBB4;EGFR;ERBB2;ERBB3	NO
	ERBB4	ENST00000342788.4	CCDS2394.1	1308	9	0.00688073	1	PER1=9aa(751-759)	Family-wise	682.para.3	ERBB4;EGFR;ERBB2;ERBB3	NO
	ERG	ENST00000417133.2	CCDS46648.1	486	14	0.0288066	1	PER1=14aa(369-382)	Family-wise	2476.para.2	FLI1;ERG	NO
	ESR1	ENST00000440973.1	CCDS5234.1	595	9	0.0151261	1	PER1=9aa(530-538)	Family-wise	1023.para.2	ESR2;ESR1;ESRRG;ESRRA	NO
	ESR2	ENST00000341099.4	CCDS9762.1	530	9	0.0169811	1	PER1=9aa(481-489)	Family-wise	1023.para.2	ESR2;ESR1;ESRRG;ESRRA	NO
	ESRRA	ENST00000405666.1	CCDS41667.1	423	9	0.0212766	1	PER1=9aa(404-412)	Family-wise	1023.para.2	ESR2;ESR1;ESRRG;ESRRA	NO
	ESRRG	ENST00000366937.1	CCDS58061.1	470	9	0.0191489	1	PER1=9aa(452-460)	Family-wise	1023.para.2	ESR2;ESR1;ESRRG;ESRRA	NO
	EXT2	ENST00000395673.3	CCDS53618.1	751	9	0.011984	1	PER1=9aa(352-360)	Family-wise	3048.para.1	EXT1;EXTL1;EXT2	NO
	EXTL1	ENST00000374280.3	CCDS271.1	676	9	0.0133136	1	PER1=9aa(274-282)	Family-wise	3048.para.1	EXT1;EXTL1;EXT2	NO
	EZH1	ENST00000428826.2	CCDS32659.1	747	9	0.0120482	1	PER1=9aa(734-742)	Family-wise	1260.para.1	EZH2;EZH1	NO
	EZH2	ENST00000320356.2	CCDS5891.1	751	9	0.011984	1	PER1=9aa(738-746)	Family-wise	1260.para.1	EZH2;EZH1	NO
	F10	ENST00000375559.3	CCDS9530.1	488	9	0.0184426	1	PER1=9aa(399-407)	Family-wise	2553.para.2	F10;F9;F7;PROC;PROZ	NO
	F13A1	ENST00000264870.3	CCDS4496.1	732	27	0.0368852	3	PER1=9aa(222-230),PER2=9aa(319-327),PER3=9aa(369-377)	Family-wise	1294.para.1	TGM1;F13A1;TGM4;TGM7;TGM5;TGM6;TGM3;TGM2;EPB42	NO
	F7	ENST00000375581.3	CCDS9528.1	466	9	0.0193133	1	PER1=9aa(384-392)	Family-wise	2553.para.2	F10;F9;F7;PROC;PROZ	NO
	F9	ENST00000218099.2	CCDS14666.1	461	9	0.0195228	1	PER1=9aa(391-399)	Family-wise	2553.para.2	F10;F9;F7;PROC;PROZ	NO
	FAM111A	ENST00000528737.1	CCDS7973.1	611	14	0.0229133	1	PER1=14aa(510-523)	Family-wise	1802.para.1	FAM111A;FAM111B	NO
	FAM126B	ENST00000418596.3	CCDS2335.1	530	9	0.0169811	1	PER1=9aa(51-59)	Family-wise	3018.para.1	FAM126A;FAM126B	NO
	FARP1	ENST00000319562.6	CCDS66572.1	1076	23	0.0213755	2	PER1=9aa(263-271),PER2=14aa(301-314)	Family-wise	687.para.2	EPB41L4B;EPB41L5;EPB41L4A;EPB41L3;EPB41;EPB41L2;EPB41L1;FARP2;FARP1;FRMD7;PTPN4;PTPN3	NO
	FARP2	ENST00000264042.3	CCDS33424.1	1054	23	0.0218216	2	PER1=9aa(267-275),PER2=14aa(305-318)	Family-wise	687.para.2	EPB41L4B;EPB41L5;EPB41L4A;EPB41L3;EPB41;EPB41L2;EPB41L1;FARP2;FARP1;FRMD7;PTPN4;PTPN3	NO
	FGFR1	ENST00000425967.3	CCDS55223.1	853	28	0.0328253	2	PER1=14aa(277-290),PER2=14aa(307-320)	Family-wise	683.para.2	FGFR1;FGFR2;FGFR3;FGFR4	NO
	FGFR2	ENST00000457416.2	CCDS7620.2	822	28	0.0340633	2	PER1=14aa(247-260),PER2=14aa(277-290)	Family-wise	683.para.2	FGFR1;FGFR2;FGFR3;FGFR4	NO
	FGFR4	ENST00000292408.4	CCDS4410.1	802	28	0.0349127	2	PER1=14aa(240-253),PER2=14aa(270-283)	Family-wise	683.para.2	FGFR1;FGFR2;FGFR3;FGFR4	NO
	FIGN	ENST00000333129.3	CCDS2221.2	759	55	0.0724638	5	PER1=14aa(502-515),PER2=14aa(522-535),PER3=9aa(565-573),PER4=9aa(603-611),PER5=9aa(628-636)	Family-wise	1762.para.1	FIGNL1;FIGN;SPAST;IQCA1;IQCA1L	NO
	FIGNL1	ENST00000419119.1	CCDS5510.1	674	55	0.0816024	5	PER1=14aa(417-430),PER2=14aa(437-450),PER3=9aa(480-488),PER4=9aa(518-526),PER5=9aa(543-551)	Family-wise	1762.para.1	FIGNL1;FIGN;SPAST;IQCA1;IQCA1L	NO
	FLT1	ENST00000282397.4	CCDS9330.1	1338	41	0.0306428	4	PER1=9aa(1004-1012),PER2=14aa(1019-1032),PER3=9aa(1034-1042),PER4=9aa(1089-1097)	Family-wise	683.para.1	FLT1;KDR;FLT4	NO
	FOXG1	#N/A	CCDS9636.1	489	42	0.0858896	3	PER1=14aa(184-197),PER2=19aa(224-242),PER3=9aa(253-261)	Family-wise	1003.para.3	FOXG1;FOXQ1;FOXN2;FOXN3	NO
	FOXN2	ENST00000340553.3	CCDS1838.1	431	41	0.0951276	3	PER1=14aa(115-128),PER2=19aa(155-173),PER3=8aa(185-192)	Family-wise	1003.para.3	FOXG1;FOXQ1;FOXN2;FOXN3	NO
	FOXN3	ENST00000345097.4	CCDS41977.1	490	41	0.0836735	3	PER1=14aa(117-130),PER2=19aa(157-175),PER3=8aa(187-194)	Family-wise	1003.para.3	FOXG1;FOXQ1;FOXN2;FOXN3	NO
	FOXQ1	#N/A	CCDS4471.1	403	42	0.104218	3	PER1=14aa(122-135),PER2=19aa(162-180),PER3=9aa(192-200)	Family-wise	1003.para.3	FOXG1;FOXQ1;FOXN2;FOXN3	NO
	FRMD7	ENST00000298542.4	CCDS35397.1	714	23	0.0322129	2	PER1=9aa(225-233),PER2=14aa(263-276)	Family-wise	687.para.2	EPB41L4B;EPB41L5;EPB41L4A;EPB41L3;EPB41;EPB41L2;EPB41L1;FARP2;FARP1;FRMD7;PTPN4;PTPN3	NO
	FSHR	ENST00000406846.2	CCDS1843.1	695	19	0.0273381	1	PER1=19aa(566-584)	Family-wise	1055.para.1	LHCGR;FSHR;TSHR	NO
	FTH1	ENST00000273550.7	CCDS41655.1	183	9	0.0491803	1	PER1=9aa(26-34)	Family-wise	2246.para.1	FTH1;FTHL17;FTL	NO
	FTHL17	ENST00000359202.3	CCDS14227.1	183	9	0.0491803	1	PER1=9aa(26-34)	Family-wise	2246.para.1	FTH1;FTHL17;FTL	NO
	FTL	ENST00000331825.6	CCDS33070.1	175	9	0.0514286	1	PER1=9aa(22-30)	Family-wise	2246.para.1	FTH1;FTHL17;FTL	NO
	GABRA1	ENST00000428797.2	CCDS4357.1	456	37	0.0811404	3	PER1=9aa(259-267),PER2=19aa(284-302),PER3=9aa(304-312)	Family-wise	1719.para.1	GABRA6;GABRA4;GABRA1;GABRA2;GABRA3;GABRA5;GABRG2;GABRG1;GABRG3;GABRE	NO
	GABRA2	ENST00000510861.1	CCDS3471.1	451	37	0.0820399	3	PER1=9aa(259-267),PER2=19aa(284-302),PER3=9aa(304-312)	Family-wise	1719.para.1	GABRA6;GABRA4;GABRA1;GABRA2;GABRA3;GABRA5;GABRG2;GABRG1;GABRG3;GABRE	NO
	GABRA3	ENST00000370314.4	CCDS14706.1	492	37	0.0752033	3	PER1=9aa(284-292),PER2=19aa(309-327),PER3=9aa(329-337)	Family-wise	1719.para.1	GABRA6;GABRA4;GABRA1;GABRA2;GABRA3;GABRA5;GABRG2;GABRG1;GABRG3;GABRE	NO
	GABRA4	ENST00000264318.3	CCDS3473.1	554	37	0.066787	3	PER1=9aa(265-273),PER2=19aa(290-308),PER3=9aa(310-318)	Family-wise	1719.para.1	GABRA6;GABRA4;GABRA1;GABRA2;GABRA3;GABRA5;GABRG2;GABRG1;GABRG3;GABRE	NO
	GABRA5	ENST00000335625.5	CCDS45194.1	462	37	0.0800866	3	PER1=9aa(266-274),PER2=19aa(291-309),PER3=9aa(311-319)	Family-wise	1719.para.1	GABRA6;GABRA4;GABRA1;GABRA2;GABRA3;GABRA5;GABRG2;GABRG1;GABRG3;GABRE	NO
	GABRA6	ENST00000274545.5	CCDS4356.1	453	37	0.0816777	3	PER1=9aa(249-257),PER2=19aa(274-292),PER3=9aa(294-302)	Family-wise	1719.para.1	GABRA6;GABRA4;GABRA1;GABRA2;GABRA3;GABRA5;GABRG2;GABRG1;GABRG3;GABRE	NO
	GABRB1	ENST00000295454.3	CCDS3474.1	474	75	0.158228	4	PER1=9aa(89-97),PER2=14aa(176-189),PER3=19aa(243-261),PER4=33aa(273-305)	Family-wise	3268.para.1	GABRB3;GABRB2;GABRB1;GABRQ;GABRP;GABRD;GABRR2;GABRR1;GABRR3;GLRA3;GLRA1;GLRA2;GLRA4;GLRB	NO
	GABRB3	ENST00000311550.5	CCDS10018.1	473	75	0.158562	4	PER1=9aa(89-97),PER2=14aa(176-189),PER3=19aa(243-261),PER4=33aa(273-305)	Family-wise	3268.para.1	GABRB3;GABRB2;GABRB1;GABRQ;GABRP;GABRD;GABRR2;GABRR1;GABRR3;GLRA3;GLRA1;GLRA2;GLRA4;GLRB	NO
	GABRD	ENST00000378585.4	CCDS36.1	452	75	0.165929	4	PER1=9aa(92-100),PER2=14aa(179-192),PER3=19aa(247-265),PER4=33aa(277-309)	Family-wise	3268.para.1	GABRB3;GABRB2;GABRB1;GABRQ;GABRP;GABRD;GABRR2;GABRR1;GABRR3;GLRA3;GLRA1;GLRA2;GLRA4;GLRB	NO
	GABRE	ENST00000370328.3	CCDS14703.1	506	37	0.0731225	3	PER1=9aa(286-294),PER2=19aa(311-329),PER3=9aa(331-339)	Family-wise	1719.para.1	GABRA6;GABRA4;GABRA1;GABRA2;GABRA3;GABRA5;GABRG2;GABRG1;GABRG3;GABRE	NO
	GABRG1	ENST00000295452.4	CCDS3470.1	465	37	0.0795699	3	PER1=9aa(279-287),PER2=19aa(304-322),PER3=9aa(324-332)	Family-wise	1719.para.1	GABRA6;GABRA4;GABRA1;GABRA2;GABRA3;GABRA5;GABRG2;GABRG1;GABRG3;GABRE	NO
	GABRG2	ENST00000414552.2	CCDS47333.1	515	37	0.0718447	3	PER1=9aa(321-329),PER2=19aa(346-364),PER3=9aa(366-374)	Family-wise	1719.para.1	GABRA6;GABRA4;GABRA1;GABRA2;GABRA3;GABRA5;GABRG2;GABRG1;GABRG3;GABRE	NO
	GABRG3	ENST00000333743.6	CCDS45195.1	467	37	0.0792291	3	PER1=9aa(262-270),PER2=19aa(287-305),PER3=9aa(307-315)	Family-wise	1719.para.1	GABRA6;GABRA4;GABRA1;GABRA2;GABRA3;GABRA5;GABRG2;GABRG1;GABRG3;GABRE	NO
	GABRP	ENST00000518525.1	CCDS4375.1	440	76	0.172727	4	PER1=9aa(89-97),PER2=14aa(175-188),PER3=19aa(242-260),PER4=34aa(272-305)	Family-wise	3268.para.1	GABRB3;GABRB2;GABRB1;GABRQ;GABRP;GABRD;GABRR2;GABRR1;GABRR3;GLRA3;GLRA1;GLRA2;GLRA4;GLRB	NO
	GABRQ	ENST00000370306.2	CCDS14707.1	632	75	0.118671	4	PER1=9aa(111-119),PER2=14aa(198-211),PER3=19aa(265-283),PER4=33aa(295-327)	Family-wise	3268.para.1	GABRB3;GABRB2;GABRB1;GABRQ;GABRP;GABRD;GABRR2;GABRR1;GABRR3;GLRA3;GLRA1;GLRA2;GLRA4;GLRB	NO
	GABRR1	ENST00000454853.2	CCDS5019.2	479	75	0.156576	4	PER1=9aa(125-133),PER2=14aa(213-226),PER3=19aa(281-299),PER4=33aa(311-343)	Family-wise	3268.para.1	GABRB3;GABRB2;GABRB1;GABRQ;GABRP;GABRD;GABRR2;GABRR1;GABRR3;GLRA3;GLRA1;GLRA2;GLRA4;GLRB	NO
	GABRR2	ENST00000402938.3	CCDS5020.3	465	75	0.16129	4	PER1=9aa(105-113),PER2=14aa(193-206),PER3=19aa(261-279),PER4=33aa(291-323)	Family-wise	3268.para.1	GABRB3;GABRB2;GABRB1;GABRQ;GABRP;GABRD;GABRR2;GABRR1;GABRR3;GLRA3;GLRA1;GLRA2;GLRA4;GLRB	NO
	GABRR3	#N/A	CCDS54617.1	467	75	0.1606	4	PER1=9aa(111-119),PER2=14aa(199-212),PER3=19aa(267-285),PER4=33aa(297-329)	Family-wise	3268.para.1	GABRB3;GABRB2;GABRB1;GABRQ;GABRP;GABRD;GABRR2;GABRR1;GABRR3;GLRA3;GLRA1;GLRA2;GLRA4;GLRB	NO
	GALNS	ENST00000268695.5	CCDS10970.1	522	99	0.189655	8	PER1=14aa(34-47),PER2=24aa(74-97),PER3=9aa(134-142),PER4=13aa(158-170),PER5=9aa(285-293),PER6=8aa(301-308),PER7=13aa(311-323),PER8=9aa(340-348)	Family-wise	2947.para.1	GALNS;ARSA;ARSG;ARSD;ARSH;ARSE;ARSF;STS;ARSJ;ARSI;ARSB	NO
	GATA2	ENST00000341105.2	CCDS3049.1	480	37	0.0770833	3	PER1=9aa(311-319),PER2=14aa(346-359),PER3=14aa(366-379)	Family-wise	1713.para.1	GATA2;GATA3	NO
	GFPT1	ENST00000357308.4	CCDS58713.1	699	9	0.0128755	1	PER1=9aa(11-19)	Family-wise	1117.para.1	GFPT1;GFPT2	NO
	GFPT2	ENST00000253778.8	CCDS43411.1	682	9	0.0131965	1	PER1=9aa(11-19)	Family-wise	1117.para.1	GFPT1;GFPT2	NO
	GJA1	ENST00000282561.3	CCDS5123.1	382	85	0.222513	5	PER1=34aa(19-52),PER2=14aa(54-67),PER3=14aa(69-82),PER4=9aa(84-92),PER5=14aa(196-209)	Family-wise	471.para.1	GJA4;GJA1;GJA3;GJA8;GJA5;GJD3;GJA9;GJA10;GJC2;GJC1	NO
	GJA10	ENST00000369352.1	CCDS5025.1	543	85	0.156538	5	PER1=34aa(19-52),PER2=14aa(54-67),PER3=14aa(69-82),PER4=9aa(84-92),PER5=14aa(198-211)	Family-wise	471.para.1	GJA4;GJA1;GJA3;GJA8;GJA5;GJD3;GJA9;GJA10;GJC2;GJC1	NO
	GJA3	ENST00000241125.3	CCDS9289.1	435	85	0.195402	5	PER1=34aa(19-52),PER2=14aa(54-67),PER3=14aa(69-82),PER4=9aa(84-92),PER5=14aa(190-203)	Family-wise	471.para.1	GJA4;GJA1;GJA3;GJA8;GJA5;GJD3;GJA9;GJA10;GJC2;GJC1	NO
	GJA4	ENST00000342280.4	CCDS30669.1	333	85	0.255255	5	PER1=34aa(19-52),PER2=14aa(54-67),PER3=14aa(69-82),PER4=9aa(84-92),PER5=14aa(196-209)	Family-wise	471.para.1	GJA4;GJA1;GJA3;GJA8;GJA5;GJD3;GJA9;GJA10;GJC2;GJC1	NO
	GJA5	ENST00000271348.2	CCDS929.1	358	85	0.23743	5	PER1=34aa(19-52),PER2=14aa(54-67),PER3=14aa(69-82),PER4=9aa(84-92),PER5=14aa(194-207)	Family-wise	471.para.1	GJA4;GJA1;GJA3;GJA8;GJA5;GJD3;GJA9;GJA10;GJC2;GJC1	NO
	GJA8	ENST00000240986.4	CCDS30834.1	433	85	0.196305	5	PER1=34aa(19-52),PER2=14aa(54-67),PER3=14aa(69-82),PER4=9aa(84-92),PER5=14aa(192-205)	Family-wise	471.para.1	GJA4;GJA1;GJA3;GJA8;GJA5;GJD3;GJA9;GJA10;GJC2;GJC1	NO
	GJA9	ENST00000357771.3	CCDS432.1	515	85	0.165049	5	PER1=34aa(19-52),PER2=14aa(54-67),PER3=14aa(69-82),PER4=9aa(84-92),PER5=14aa(198-211)	Family-wise	471.para.1	GJA4;GJA1;GJA3;GJA8;GJA5;GJD3;GJA9;GJA10;GJC2;GJC1	NO
	GJC1	ENST00000426548.1	CCDS11487.1	396	85	0.214646	5	PER1=34aa(18-51),PER2=14aa(53-66),PER3=14aa(68-81),PER4=9aa(83-91),PER5=14aa(218-231)	Family-wise	471.para.1	GJA4;GJA1;GJA3;GJA8;GJA5;GJD3;GJA9;GJA10;GJC2;GJC1	NO
	GJC2	ENST00000366714.2	CCDS1569.1	439	85	0.193622	5	PER1=34aa(21-54),PER2=14aa(56-69),PER3=14aa(71-84),PER4=9aa(86-94),PER5=14aa(254-267)	Family-wise	471.para.1	GJA4;GJA1;GJA3;GJA8;GJA5;GJD3;GJA9;GJA10;GJC2;GJC1	NO
	GJD3	ENST00000578689.1	CCDS58547.1	294	85	0.289116	5	PER1=34aa(19-52),PER2=14aa(54-67),PER3=14aa(69-82),PER4=9aa(84-92),PER5=14aa(177-190)	Family-wise	471.para.1	GJA4;GJA1;GJA3;GJA8;GJA5;GJD3;GJA9;GJA10;GJC2;GJC1	NO
	GLRA2	ENST00000218075.4	CCDS48085.1	452	75	0.165929	4	PER1=9aa(99-107),PER2=14aa(187-200),PER3=19aa(254-272),PER4=33aa(284-316)	Family-wise	3268.para.1	GABRB3;GABRB2;GABRB1;GABRQ;GABRP;GABRD;GABRR2;GABRR1;GABRR3;GLRA3;GLRA1;GLRA2;GLRA4;GLRB	NO
	GLRA3	ENST00000274093.3	CCDS3822.1	464	75	0.161638	4	PER1=9aa(98-106),PER2=14aa(186-199),PER3=19aa(253-271),PER4=33aa(283-315)	Family-wise	3268.para.1	GABRB3;GABRB2;GABRB1;GABRQ;GABRP;GABRD;GABRR2;GABRR1;GABRR3;GLRA3;GLRA1;GLRA2;GLRA4;GLRB	NO
	GLRA4	ENST00000372617.4	CCDS43980.2	417	75	0.179856	4	PER1=9aa(99-107),PER2=14aa(187-200),PER3=19aa(255-273),PER4=33aa(285-317)	Family-wise	3268.para.1	GABRB3;GABRB2;GABRB1;GABRQ;GABRP;GABRD;GABRR2;GABRR1;GABRR3;GLRA3;GLRA1;GLRA2;GLRA4;GLRB	NO
	GLRB	ENST00000264428.4	CCDS3796.1	497	75	0.150905	4	PER1=9aa(108-116),PER2=14aa(198-211),PER3=19aa(266-284),PER4=33aa(296-328)	Family-wise	3268.para.1	GABRB3;GABRB2;GABRB1;GABRQ;GABRP;GABRD;GABRR2;GABRR1;GABRR3;GLRA3;GLRA1;GLRA2;GLRA4;GLRB	NO
	GLUD2	ENST00000328078.1	CCDS14603.1	558	19	0.0340502	1	PER1=19aa(491-509)	Family-wise	2586.para.1	GLUD1;GLUD2	NO
	GNA11	ENST00000078429.4	CCDS12103.1	359	33	0.091922	2	PER1=19aa(43-61),PER2=14aa(201-214)	Family-wise	2507.para.1	GNA11;GNAQ;GNA14;GNA15;GNAI1;GNAI3;GNAI2;GNAO1;GNAT2;GNAT1;GNAT3;GNAZ	NO
	GNA14	ENST00000341700.6	CCDS6657.1	355	33	0.0929577	2	PER1=19aa(39-57),PER2=14aa(197-210)	Family-wise	2507.para.1	GNA11;GNAQ;GNA14;GNA15;GNAI1;GNAI3;GNAI2;GNAO1;GNAT2;GNAT1;GNAT3;GNAZ	NO
	GNA15	ENST00000262958.3	CCDS12104.1	374	33	0.0882353	2	PER1=19aa(46-64),PER2=14aa(204-217)	Family-wise	2507.para.1	GNA11;GNAQ;GNA14;GNA15;GNAI1;GNAI3;GNAI2;GNAO1;GNAT2;GNAT1;GNAT3;GNAZ	NO
	GNAI1	ENST00000351004.3	CCDS5595.1	354	33	0.0932203	2	PER1=19aa(37-55),PER2=14aa(196-209)	Family-wise	2507.para.1	GNA11;GNAQ;GNA14;GNA15;GNAI1;GNAI3;GNAI2;GNAO1;GNAT2;GNAT1;GNAT3;GNAZ	NO
	GNAI2	ENST00000313601.6	CCDS2813.1	355	33	0.0929577	2	PER1=19aa(37-55),PER2=14aa(197-210)	Family-wise	2507.para.1	GNA11;GNAQ;GNA14;GNA15;GNAI1;GNAI3;GNAI2;GNAO1;GNAT2;GNAT1;GNAT3;GNAZ	NO
	GNAO1	ENST00000262494.7	CCDS10757.1	354	33	0.0932203	2	PER1=19aa(37-55),PER2=14aa(197-210)	Family-wise	2507.para.1	GNA11;GNAQ;GNA14;GNA15;GNAI1;GNAI3;GNAI2;GNAO1;GNAT2;GNAT1;GNAT3;GNAZ	NO
	GNAQ	ENST00000286548.4	CCDS6658.1	359	33	0.091922	2	PER1=19aa(43-61),PER2=14aa(201-214)	Family-wise	2507.para.1	GNA11;GNAQ;GNA14;GNA15;GNAI1;GNAI3;GNAI2;GNAO1;GNAT2;GNAT1;GNAT3;GNAZ	NO
	GNAT1	ENST00000232461.3	CCDS2812.1	350	33	0.0942857	2	PER1=19aa(33-51),PER2=14aa(192-205)	Family-wise	2507.para.1	GNA11;GNAQ;GNA14;GNA15;GNAI1;GNAI3;GNAI2;GNAO1;GNAT2;GNAT1;GNAT3;GNAZ	NO
	GNAT2	ENST00000351050.3	CCDS803.1	354	33	0.0932203	2	PER1=19aa(37-55),PER2=14aa(196-209)	Family-wise	2507.para.1	GNA11;GNAQ;GNA14;GNA15;GNAI1;GNAI3;GNAI2;GNAO1;GNAT2;GNAT1;GNAT3;GNAZ	NO
	GNAT3	ENST00000398291.3	CCDS47625.1	354	33	0.0932203	2	PER1=19aa(37-55),PER2=14aa(196-209)	Family-wise	2507.para.1	GNA11;GNAQ;GNA14;GNA15;GNAI1;GNAI3;GNAI2;GNAO1;GNAT2;GNAT1;GNAT3;GNAZ	NO
	GNAZ	ENST00000248996.4	CCDS13804.1	355	33	0.0929577	2	PER1=19aa(37-55),PER2=14aa(197-210)	Family-wise	2507.para.1	GNA11;GNAQ;GNA14;GNA15;GNAI1;GNAI3;GNAI2;GNAO1;GNAT2;GNAT1;GNAT3;GNAZ	NO
	GNB1	ENST00000378609.4	CCDS34.1	340	32	0.0941176	3	PER1=9aa(51-59),PER2=9aa(71-79),PER3=14aa(86-99)	Family-wise	3518.para.1	GNB1;GNB4;GNB2;GNB3;GNB5	NO
	GNB2	ENST00000303210.4	CCDS5703.1	340	32	0.0941176	3	PER1=9aa(51-59),PER2=9aa(71-79),PER3=14aa(86-99)	Family-wise	3518.para.1	GNB1;GNB4;GNB2;GNB3;GNB5	NO
	GNB3	ENST00000229264.3	CCDS8564.1	340	32	0.0941176	3	PER1=9aa(51-59),PER2=9aa(71-79),PER3=14aa(86-99)	Family-wise	3518.para.1	GNB1;GNB4;GNB2;GNB3;GNB5	NO
	GNB4	ENST00000232564.3	CCDS3230.1	340	32	0.0941176	3	PER1=9aa(51-59),PER2=9aa(71-79),PER3=14aa(86-99)	Family-wise	3518.para.1	GNB1;GNB4;GNB2;GNB3;GNB5	NO
	GNB5	ENST00000261837.7	CCDS10149.1	395	32	0.0810127	3	PER1=9aa(101-109),PER2=9aa(121-129),PER3=14aa(136-149)	Family-wise	3518.para.1	GNB1;GNB4;GNB2;GNB3;GNB5	NO
	GRIA1	ENST00000518783.1	CCDS58987.1	916	23	0.0251092	2	PER1=9aa(620-628),PER2=14aa(640-653)	Family-wise	147.para.1	GRIK4;GRIK5;GRIK2;GRIK3;GRIK1;GRIA4;GRIA2;GRIA3;GRIA1;GRID2;GRID1	NO
	GRIA2	ENST00000296526.7	CCDS3797.1	883	23	0.0260476	2	PER1=9aa(617-625),PER2=14aa(637-650)	Family-wise	147.para.1	GRIK4;GRIK5;GRIK2;GRIK3;GRIK1;GRIA4;GRIA2;GRIA3;GRIA1;GRID2;GRID1	NO
	GRIA3	ENST00000264357.5	CCDS14605.1	894	23	0.0257271	2	PER1=9aa(628-636),PER2=14aa(648-661)	Family-wise	147.para.1	GRIK4;GRIK5;GRIK2;GRIK3;GRIK1;GRIA4;GRIA2;GRIA3;GRIA1;GRID2;GRID1	NO
	GRID1	ENST00000327946.7	CCDS31236.1	1009	23	0.0227948	2	PER1=9aa(628-636),PER2=14aa(648-661)	Family-wise	147.para.1	GRIK4;GRIK5;GRIK2;GRIK3;GRIK1;GRIA4;GRIA2;GRIA3;GRIA1;GRID2;GRID1	NO
	GRID2	ENST00000282020.4	CCDS3637.1	1007	23	0.0228401	2	PER1=9aa(628-636),PER2=14aa(648-661)	Family-wise	147.para.1	GRIK4;GRIK5;GRIK2;GRIK3;GRIK1;GRIA4;GRIA2;GRIA3;GRIA1;GRID2;GRID1	NO
	GRIK1	ENST00000399907.1	CCDS42913.1	918	23	0.0250545	2	PER1=9aa(646-654),PER2=14aa(666-679)	Family-wise	147.para.1	GRIK4;GRIK5;GRIK2;GRIK3;GRIK1;GRIA4;GRIA2;GRIA3;GRIA1;GRID2;GRID1	NO
	GRIK2	ENST00000421544.1	CCDS5048.1	908	23	0.0253304	2	PER1=9aa(631-639),PER2=14aa(651-664)	Family-wise	147.para.1	GRIK4;GRIK5;GRIK2;GRIK3;GRIK1;GRIA4;GRIA2;GRIA3;GRIA1;GRID2;GRID1	NO
	GRIK3	ENST00000373091.3	CCDS416.1	919	23	0.0250272	2	PER1=9aa(633-641),PER2=14aa(653-666)	Family-wise	147.para.1	GRIK4;GRIK5;GRIK2;GRIK3;GRIK1;GRIA4;GRIA2;GRIA3;GRIA1;GRID2;GRID1	NO
	GRIK4	ENST00000527524.2	CCDS8433.1	956	23	0.0240586	2	PER1=9aa(616-624),PER2=14aa(636-649)	Family-wise	147.para.1	GRIK4;GRIK5;GRIK2;GRIK3;GRIK1;GRIA4;GRIA2;GRIA3;GRIA1;GRID2;GRID1	NO
	GRIK5	ENST00000262895.3	CCDS77305.1	981	23	0.0234455	2	PER1=9aa(615-623),PER2=14aa(635-648)	Family-wise	147.para.1	GRIK4;GRIK5;GRIK2;GRIK3;GRIK1;GRIA4;GRIA2;GRIA3;GRIA1;GRID2;GRID1	NO
	GRIN2B	ENST00000609686.1	CCDS8662.1	1484	51	0.0343666	4	PER1=9aa(511-519),PER2=9aa(551-559),PER3=9aa(611-619),PER4=24aa(636-659)	Family-wise	1333.para.1	GRIN2B;GRIN2A;GRIN2D;GRIN2C	NO
	GRIN2C	ENST00000293190.5	CCDS32724.1	1233	51	0.0413625	4	PER1=9aa(508-516),PER2=9aa(548-556),PER3=9aa(608-616),PER4=24aa(633-656)	Family-wise	1333.para.1	GRIN2B;GRIN2A;GRIN2D;GRIN2C	NO
	GRIN2D	ENST00000263269.3	CCDS12719.1	1336	51	0.0381737	4	PER1=9aa(538-546),PER2=9aa(578-586),PER3=9aa(638-646),PER4=24aa(663-686)	Family-wise	1333.para.1	GRIN2B;GRIN2A;GRIN2D;GRIN2C	NO
	HCN1	ENST00000303230.4	CCDS3952.1	890	123	0.138202	7	PER1=14aa(152-165),PER2=19aa(260-278),PER3=24aa(305-328),PER4=29aa(344-372),PER5=19aa(384-402),PER6=9aa(503-511),PER7=9aa(530-538)	Family-wise	933.para.1	CNGA3;CNGA1;CNGA2;CNGA4;CNGB3;HCN1;HCN2;HCN3;KCNH8;KCNH4;KCNH3;KCNH2;KCNH6;KCNH7;KCNH1;KCNH5	NO
	HCN2	ENST00000251287.2	CCDS12035.1	889	123	0.138358	7	PER1=14aa(221-234),PER2=19aa(329-347),PER3=24aa(374-397),PER4=29aa(413-441),PER5=19aa(453-471),PER6=9aa(572-580),PER7=9aa(599-607)	Family-wise	933.para.1	CNGA3;CNGA1;CNGA2;CNGA4;CNGB3;HCN1;HCN2;HCN3;KCNH8;KCNH4;KCNH3;KCNH2;KCNH6;KCNH7;KCNH1;KCNH5	NO
	HCN3	ENST00000368358.3	CCDS1108.1	774	123	0.158915	7	PER1=14aa(103-116),PER2=19aa(213-231),PER3=24aa(258-281),PER4=29aa(297-325),PER5=19aa(337-355),PER6=9aa(456-464),PER7=9aa(483-491)	Family-wise	933.para.1	CNGA3;CNGA1;CNGA2;CNGA4;CNGB3;HCN1;HCN2;HCN3;KCNH8;KCNH4;KCNH3;KCNH2;KCNH6;KCNH7;KCNH1;KCNH5	NO
	HECW1	ENST00000395891.2	CCDS5469.2	1606	9	0.00560399	1	PER1=9aa(1224-1232)	Family-wise	1758.para.2	HECW1;HECW2	NO
	HIF1A	ENST00000539097.1	CCDS58324.1	850	15	0.0176471	1	PER1=15aa(589-603)	Family-wise	1782.para.3	SIM1;SIM2;NPAS3;HIF1A;EPAS1;HIF3A;NPAS2;CLOCK	NO
	HIF3A	ENST00000377670.4	CCDS12681.2	669	15	0.0224215	1	PER1=15aa(493-507)	Family-wise	1782.para.3	SIM1;SIM2;NPAS3;HIF1A;EPAS1;HIF3A;NPAS2;CLOCK	NO
	HNRNPA0	ENST00000314940.4	CCDS4193.1	305	17	0.0557377	2	PER1=8aa(254-261),PER2=9aa(263-271)	Family-wise	1997.para.2	HNRNPA1L2;HNRNPA1;HNRNPA3;HNRNPA2B1;HNRNPA0	NO
	HNRNPA1L2	ENST00000342657.3	CCDS31980.1	320	17	0.053125	2	PER1=8aa(262-269),PER2=9aa(271-279)	Family-wise	1997.para.2	HNRNPA1L2;HNRNPA1;HNRNPA3;HNRNPA2B1;HNRNPA0	NO
	HNRNPA2B1	ENST00000354667.4	CCDS43557.1	353	17	0.0481586	2	PER1=8aa(302-309),PER2=9aa(311-319)	Family-wise	1997.para.2	HNRNPA1L2;HNRNPA1;HNRNPA3;HNRNPA2B1;HNRNPA0	NO
	HNRNPA3	ENST00000392524.2	CCDS2273.1	378	18	0.047619	2	PER1=9aa(331-339),PER2=9aa(341-349)	Family-wise	1997.para.2	HNRNPA1L2;HNRNPA1;HNRNPA3;HNRNPA2B1;HNRNPA0	NO
	HNRNPF	ENST00000443950.2	CCDS7204.1	415	14	0.0337349	1	PER1=14aa(201-214)	Family-wise	1095.para.2	HNRNPF;HNRNPH1;HNRNPH2	NO
	HNRNPH1	ENST00000356731.5	CCDS4446.1	449	14	0.0311804	1	PER1=14aa(201-214)	Family-wise	1095.para.2	HNRNPF;HNRNPH1;HNRNPH2	NO
	HNRNPH2	ENST00000316594.5	CCDS14485.1	449	14	0.0311804	1	PER1=14aa(201-214)	Family-wise	1095.para.2	HNRNPF;HNRNPH1;HNRNPH2	NO
	HOXA10	ENST00000283921.4	CCDS5410.2	410	14	0.0341463	1	PER1=14aa(381-394)	Family-wise	1427.para.2	HOXA10;HOXD10;HOXC10;HOXB9;HOXC9;HOXA9;HOXC11;HOXD12;HOXC13;HOXA13;HOXB13;HOXD13	NO
	HOXA9	ENST00000343483.6	CCDS5409.1	272	14	0.0514706	1	PER1=14aa(251-264)	Family-wise	1427.para.2	HOXA10;HOXD10;HOXC10;HOXB9;HOXC9;HOXA9;HOXC11;HOXD12;HOXC13;HOXA13;HOXB13;HOXD13	NO
	HOXB9	ENST00000311177.5	CCDS11534.1	250	14	0.056	1	PER1=14aa(230-243)	Family-wise	1427.para.2	HOXA10;HOXD10;HOXC10;HOXB9;HOXC9;HOXA9;HOXC11;HOXD12;HOXC13;HOXA13;HOXB13;HOXD13	NO
	HOXC10	ENST00000303460.4	CCDS8868.1	342	14	0.0409357	1	PER1=14aa(313-326)	Family-wise	1427.para.2	HOXA10;HOXD10;HOXC10;HOXB9;HOXC9;HOXA9;HOXC11;HOXD12;HOXC13;HOXA13;HOXB13;HOXD13	NO
	HOXC11	ENST00000546378.1	CCDS8867.1	304	14	0.0460526	1	PER1=14aa(277-290)	Family-wise	1427.para.2	HOXA10;HOXD10;HOXC10;HOXB9;HOXC9;HOXA9;HOXC11;HOXD12;HOXC13;HOXA13;HOXB13;HOXD13	NO
	HOXC13	ENST00000243056.3	CCDS8865.1	330	14	0.0424242	1	PER1=14aa(305-318)	Family-wise	1427.para.2	HOXA10;HOXD10;HOXC10;HOXB9;HOXC9;HOXA9;HOXC11;HOXD12;HOXC13;HOXA13;HOXB13;HOXD13	NO
	HOXC9	ENST00000303450.4	CCDS8869.1	260	14	0.0538462	1	PER1=14aa(237-250)	Family-wise	1427.para.2	HOXA10;HOXD10;HOXC10;HOXB9;HOXC9;HOXA9;HOXC11;HOXD12;HOXC13;HOXA13;HOXB13;HOXD13	NO
	HOXD10	ENST00000249501.4	CCDS2266.1	340	14	0.0411765	1	PER1=14aa(311-324)	Family-wise	1427.para.2	HOXA10;HOXD10;HOXC10;HOXB9;HOXC9;HOXA9;HOXC11;HOXD12;HOXC13;HOXA13;HOXB13;HOXD13	NO
	HOXD12	ENST00000406506.2	CCDS46456.1	270	14	0.0518519	1	PER1=14aa(247-260)	Family-wise	1427.para.2	HOXA10;HOXD10;HOXC10;HOXB9;HOXC9;HOXA9;HOXC11;HOXD12;HOXC13;HOXA13;HOXB13;HOXD13	NO
	HOXD13	ENST00000392539.3	CCDS2264.2	343	14	0.0408163	1	PER1=14aa(321-334)	Family-wise	1427.para.2	HOXA10;HOXD10;HOXC10;HOXB9;HOXC9;HOXA9;HOXC11;HOXD12;HOXC13;HOXA13;HOXB13;HOXD13	NO
	HRAS	ENST00000451590.1	CCDS7698.1	189	33	0.174603	2	PER1=19aa(8-26),PER2=14aa(53-66)	Family-wise	3537.para.2	RRAS2;RRAS;MRAS;NRAS;KRAS;HRAS;RALB;RALA;ERAS	NO
	HSD11B2	ENST00000326152.5	CCDS10837.1	405	9	0.0222222	1	PER1=9aa(230-238)	Family-wise	1183.para.1	HSD11B2;HSD17B2;RDH16;HSD17B6;RDH5;SDR9C7;DHRS9;BDH1;HSD17B1;RDH8;DHRS7C;DHRS7B;DHRS7;KDSR	NO
	HSD17B1	ENST00000585807.1	CCDS11428.1	328	9	0.027439	1	PER1=9aa(154-162)	Family-wise	1183.para.1	HSD11B2;HSD17B2;RDH16;HSD17B6;RDH5;SDR9C7;DHRS9;BDH1;HSD17B1;RDH8;DHRS7C;DHRS7B;DHRS7;KDSR	NO
	HSD17B2	ENST00000199936.4	CCDS10936.1	387	9	0.0232558	1	PER1=9aa(230-238)	Family-wise	1183.para.1	HSD11B2;HSD17B2;RDH16;HSD17B6;RDH5;SDR9C7;DHRS9;BDH1;HSD17B1;RDH8;DHRS7C;DHRS7B;DHRS7;KDSR	NO
	HSD17B6	ENST00000554643.1	CCDS8925.1	317	9	0.0283912	1	PER1=9aa(174-182)	Family-wise	1183.para.1	HSD11B2;HSD17B2;RDH16;HSD17B6;RDH5;SDR9C7;DHRS9;BDH1;HSD17B1;RDH8;DHRS7C;DHRS7B;DHRS7;KDSR	NO
	HSPA1A	#N/A	CCDS34414.1	641	9	0.0140406	1	PER1=9aa(71-79)	Family-wise	942.para.1	HSPA1L;HSPA1A;HSPA1B;HSPA8;HSPA2;HSPA6;HSPA5;HSPA9	NO
	HSPA1B	#N/A	CCDS34415.1	641	9	0.0140406	1	PER1=9aa(71-79)	Family-wise	942.para.1	HSPA1L;HSPA1A;HSPA1B;HSPA8;HSPA2;HSPA6;HSPA5;HSPA9	NO
	HSPA1L	ENST00000375654.4	CCDS34413.1	641	9	0.0140406	1	PER1=9aa(73-81)	Family-wise	942.para.1	HSPA1L;HSPA1A;HSPA1B;HSPA8;HSPA2;HSPA6;HSPA5;HSPA9	NO
	HSPA2	#N/A	CCDS9766.1	639	9	0.0140845	1	PER1=9aa(72-80)	Family-wise	942.para.1	HSPA1L;HSPA1A;HSPA1B;HSPA8;HSPA2;HSPA6;HSPA5;HSPA9	NO
	HSPA5	ENST00000324460.6	CCDS6863.1	654	9	0.0137615	1	PER1=9aa(96-104)	Family-wise	942.para.1	HSPA1L;HSPA1A;HSPA1B;HSPA8;HSPA2;HSPA6;HSPA5;HSPA9	NO
	HSPA6	ENST00000309758.4	CCDS1231.1	643	9	0.0139969	1	PER1=9aa(73-81)	Family-wise	942.para.1	HSPA1L;HSPA1A;HSPA1B;HSPA8;HSPA2;HSPA6;HSPA5;HSPA9	NO
	HSPA8	ENST00000534624.1	CCDS8440.1	646	9	0.0139319	1	PER1=9aa(71-79)	Family-wise	942.para.1	HSPA1L;HSPA1A;HSPA1B;HSPA8;HSPA2;HSPA6;HSPA5;HSPA9	NO
	HSPA9	ENST00000297185.3	CCDS4208.1	679	9	0.0132548	1	PER1=9aa(121-129)	Family-wise	942.para.1	HSPA1L;HSPA1A;HSPA1B;HSPA8;HSPA2;HSPA6;HSPA5;HSPA9	NO
	HSPB1	ENST00000248553.6	CCDS5583.1	205	14	0.0682927	1	PER1=14aa(132-145)	Family-wise	3433.para.1	CRYAB;CRYAA;HSPB6;HSPB1;HSPB8;HSPB2;HSPB3	NO
	HSPB2	ENST00000304298.3	CCDS8352.1	182	14	0.0769231	1	PER1=14aa(111-124)	Family-wise	3433.para.1	CRYAB;CRYAA;HSPB6;HSPB1;HSPB8;HSPB2;HSPB3	NO
	HSPB3	ENST00000302005.1	CCDS3961.1	150	14	0.0933333	1	PER1=14aa(108-121)	Family-wise	3433.para.1	CRYAB;CRYAA;HSPB6;HSPB1;HSPB8;HSPB2;HSPB3	NO
	HSPB6	ENST00000592984.1	CCDS12475.1	160	14	0.0875	1	PER1=14aa(111-124)	Family-wise	3433.para.1	CRYAB;CRYAA;HSPB6;HSPB1;HSPB8;HSPB2;HSPB3	NO
	HSPB8	ENST00000281938.2	CCDS9189.1	196	14	0.0714286	1	PER1=14aa(133-146)	Family-wise	3433.para.1	CRYAB;CRYAA;HSPB6;HSPB1;HSPB8;HSPB2;HSPB3	NO
	IGF1R	ENST00000268035.6	CCDS10378.1	1367	9	0.00658376	1	PER1=9aa(1174-1182)	Family-wise	2816.para.3	INSR;IGF1R;INSRR	NO
	IL12RB2	ENST00000262345.1	CCDS638.1	862	9	0.0104408	1	PER1=9aa(608-616)	Family-wise	2070.para.2	IL31RA;CSF3R;IL6ST;IL12RB2	NO
	IL31RA	ENST00000447346.2	CCDS3970.2	764	9	0.0117801	1	PER1=9aa(536-544)	Family-wise	2070.para.2	IL31RA;CSF3R;IL6ST;IL12RB2	NO
	IL6ST	ENST00000381298.2	CCDS3971.1	918	9	0.00980392	1	PER1=9aa(602-610)	Family-wise	2070.para.2	IL31RA;CSF3R;IL6ST;IL12RB2	NO
	IMPDH1	ENST00000338791.6	CCDS34749.1	599	9	0.015025	1	PER1=9aa(306-314)	Family-wise	1815.para.2	IMPDH2;IMPDH1	NO
	IMPDH2	ENST00000326739.4	CCDS2786.1	514	9	0.0175097	1	PER1=9aa(221-229)	Family-wise	1815.para.2	IMPDH2;IMPDH1	NO
	INA	ENST00000369849.4	CCDS7545.1	499	47	0.0941884	3	PER1=24aa(90-113),PER2=14aa(384-397),PER3=9aa(399-407)	Family-wise	116.para.2	VIM;DES;PRPH;GFAP;INA;NEFL	NO
	INPP5B	ENST00000373024.3	CCDS41306.1	913	18	0.0197152	2	PER1=9aa(296-304),PER2=9aa(521-529)	Family-wise	733.para.1	OCRL;INPP5B	NO
	INSR	ENST00000302850.5	CCDS12176.1	1382	9	0.0065123	1	PER1=9aa(1198-1206)	Family-wise	2816.para.3	INSR;IGF1R;INSRR	NO
	INSRR	ENST00000368195.3	CCDS1160.1	1297	9	0.00693909	1	PER1=9aa(1154-1162)	Family-wise	2816.para.3	INSR;IGF1R;INSRR	NO
	IPP	ENST00000396478.3	CCDS30702.1	584	9	0.015411	1	PER1=9aa(54-62)	Family-wise	3288.para.1	IPP;KLHL7;GAN;IVNS1ABP	NO
	IQCA1	ENST00000409907.3	CCDS74677.1	830	54	0.0650602	5	PER1=13aa(560-572),PER2=14aa(579-592),PER3=9aa(624-632),PER4=9aa(664-672),PER5=9aa(687-695)	Family-wise	1762.para.1	FIGNL1;FIGN;SPAST;IQCA1;IQCA1L	NO
	IQCA1L	#N/A	CCDS78288.1	818	54	0.0660147	5	PER1=13aa(544-556),PER2=14aa(563-576),PER3=9aa(608-616),PER4=9aa(648-656),PER5=9aa(671-679)	Family-wise	1762.para.1	FIGNL1;FIGN;SPAST;IQCA1;IQCA1L	NO
	IRF1	ENST00000245414.4	CCDS4155.1	325	9	0.0276923	1	PER1=9aa(6-14)	Family-wise	152.para.2	IRF1;IRF2	NO
	IRF2	ENST00000393593.3	CCDS3835.1	349	9	0.025788	1	PER1=9aa(6-14)	Family-wise	152.para.2	IRF1;IRF2	NO
	IRF3	ENST00000601291.1	CCDS59409.1	452	41	0.090708	4	PER1=9aa(32-40),PER2=14aa(51-64),PER3=9aa(77-85),PER4=9aa(284-292)	Family-wise	152.para.1	IRF6;IRF5;IRF7;IRF4;IRF8;IRF9;IRF3	NO
	IRF4	ENST00000380956.4	CCDS4469.1	451	41	0.0909091	4	PER1=9aa(48-56),PER2=14aa(68-81),PER3=9aa(94-102),PER4=9aa(327-335)	Family-wise	152.para.1	IRF6;IRF5;IRF7;IRF4;IRF8;IRF9;IRF3	NO
	IRF5	ENST00000357234.5	CCDS43645.1	514	41	0.0797665	4	PER1=9aa(41-49),PER2=14aa(61-74),PER3=9aa(87-95),PER4=9aa(353-361)	Family-wise	152.para.1	IRF6;IRF5;IRF7;IRF4;IRF8;IRF9;IRF3	NO
	IRF6	ENST00000367021.3	CCDS1492.1	467	41	0.0877944	4	PER1=9aa(34-42),PER2=14aa(54-67),PER3=9aa(80-88),PER4=9aa(314-322)	Family-wise	152.para.1	IRF6;IRF5;IRF7;IRF4;IRF8;IRF9;IRF3	NO
	IRF7	ENST00000397566.1	CCDS7705.1	516	41	0.0794574	4	PER1=9aa(51-59),PER2=14aa(70-83),PER3=9aa(105-113),PER4=9aa(382-390)	Family-wise	152.para.1	IRF6;IRF5;IRF7;IRF4;IRF8;IRF9;IRF3	NO
	IRF8	ENST00000268638.5	CCDS10956.1	426	41	0.0962441	4	PER1=9aa(34-42),PER2=14aa(54-67),PER3=9aa(79-87),PER4=9aa(290-298)	Family-wise	152.para.1	IRF6;IRF5;IRF7;IRF4;IRF8;IRF9;IRF3	NO
	IRF9	ENST00000396864.3	CCDS9615.1	393	41	0.104326	4	PER1=9aa(36-44),PER2=14aa(56-69),PER3=9aa(81-89),PER4=9aa(291-299)	Family-wise	152.para.1	IRF6;IRF5;IRF7;IRF4;IRF8;IRF9;IRF3	NO
	ISL1	ENST00000230658.7	CCDS43314.1	349	14	0.0401146	1	PER1=14aa(222-235)	Family-wise	2349.para.2	LMX1B;LMX1A;ISL2;ISL1	NO
	ISL2	ENST00000290759.4	CCDS10290.1	359	14	0.0389972	1	PER1=14aa(232-245)	Family-wise	2349.para.2	LMX1B;LMX1A;ISL2;ISL1	NO
	ITGB1	ENST00000396033.2	CCDS7174.1	798	23	0.0288221	2	PER1=14aa(144-157),PER2=9aa(245-253)	Family-wise	320.para.1	ITGB7;ITGB2;ITGB1;ITGB5;ITGB3;ITGB6;ITGB8	NO
	ITGB2	ENST00000397850.2	CCDS13716.1	769	23	0.029909	2	PER1=14aa(128-141),PER2=9aa(230-238)	Family-wise	320.para.1	ITGB7;ITGB2;ITGB1;ITGB5;ITGB3;ITGB6;ITGB8	NO
	ITGB5	ENST00000296181.4	CCDS3030.1	799	23	0.028786	2	PER1=14aa(139-152),PER2=9aa(243-251)	Family-wise	320.para.1	ITGB7;ITGB2;ITGB1;ITGB5;ITGB3;ITGB6;ITGB8	NO
	ITGB6	ENST00000283249.2	CCDS2212.1	788	23	0.0291878	2	PER1=14aa(134-147),PER2=9aa(236-244)	Family-wise	320.para.1	ITGB7;ITGB2;ITGB1;ITGB5;ITGB3;ITGB6;ITGB8	NO
	ITGB7	ENST00000267082.5	CCDS8849.1	798	23	0.0288221	2	PER1=14aa(153-166),PER2=9aa(255-263)	Family-wise	320.para.1	ITGB7;ITGB2;ITGB1;ITGB5;ITGB3;ITGB6;ITGB8	NO
	ITGB8	ENST00000222573.4	CCDS5370.1	769	23	0.029909	2	PER1=14aa(148-161),PER2=9aa(250-258)	Family-wise	320.para.1	ITGB7;ITGB2;ITGB1;ITGB5;ITGB3;ITGB6;ITGB8	NO
	ITPR2	ENST00000381340.3	CCDS41764.1	2701	18	0.0066642	2	PER1=9aa(274-282),PER2=9aa(2536-2544)	Family-wise	1004.para.2	ITPR1;ITPR2;ITPR3	NO
	ITPR3	ENST00000374316.5	CCDS4783.1	2671	18	0.00673905	2	PER1=9aa(275-283),PER2=9aa(2512-2520)	Family-wise	1004.para.2	ITPR1;ITPR2;ITPR3	NO
	IVNS1ABP	ENST00000367498.3	CCDS1368.1	642	9	0.0140187	1	PER1=9aa(49-57)	Family-wise	3288.para.1	IPP;KLHL7;GAN;IVNS1ABP	NO
	JAK1	ENST00000342505.4	CCDS41346.1	1154	14	0.0121317	1	PER1=14aa(647-660)	Family-wise	682.para.2	JAK1;TYK2;JAK3;JAK2;PTK2B;PTK2	NO
	JAK2	ENST00000381652.3	CCDS6457.1	1132	14	0.0123675	1	PER1=14aa(606-619)	Family-wise	682.para.2	JAK1;TYK2;JAK3;JAK2;PTK2B;PTK2	NO
	JAK3	ENST00000458235.1	CCDS12366.1	1124	14	0.0124555	1	PER1=14aa(581-594)	Family-wise	682.para.2	JAK1;TYK2;JAK3;JAK2;PTK2B;PTK2	NO
	JUP	ENST00000393931.3	CCDS11407.1	745	9	0.0120805	1	PER1=9aa(371-379)	Family-wise	1508.para.1	JUP;CTNNB1	NO
	KCNA1	ENST00000382545.3	CCDS8535.1	495	33	0.0666667	2	PER1=14aa(319-332),PER2=19aa(394-412)	Family-wise	546.para.2	KCNA1;KCNA2;KCNA3;KCNA6;KCNA4;KCNA5;KCNA7;KCNA10	NO
	KCNA10	ENST00000369771.2	CCDS826.1	511	33	0.0645793	2	PER1=14aa(368-381),PER2=19aa(443-461)	Family-wise	546.para.2	KCNA1;KCNA2;KCNA3;KCNA6;KCNA4;KCNA5;KCNA7;KCNA10	NO
	KCNA2	ENST00000485317.1	CCDS827.1	499	33	0.0661323	2	PER1=14aa(321-334),PER2=19aa(396-414)	Family-wise	546.para.2	KCNA1;KCNA2;KCNA3;KCNA6;KCNA4;KCNA5;KCNA7;KCNA10	NO
	KCNA3	#N/A	CCDS828.2	575	33	0.0573913	2	PER1=14aa(391-404),PER2=19aa(466-484)	Family-wise	546.para.2	KCNA1;KCNA2;KCNA3;KCNA6;KCNA4;KCNA5;KCNA7;KCNA10	NO
	KCNA4	ENST00000328224.6	CCDS41629.1	653	33	0.050536	2	PER1=14aa(471-484),PER2=19aa(546-564)	Family-wise	546.para.2	KCNA1;KCNA2;KCNA3;KCNA6;KCNA4;KCNA5;KCNA7;KCNA10	NO
	KCNA5	ENST00000252321.3	CCDS8536.1	613	33	0.0538336	2	PER1=14aa(427-440),PER2=19aa(502-520)	Family-wise	546.para.2	KCNA1;KCNA2;KCNA3;KCNA6;KCNA4;KCNA5;KCNA7;KCNA10	NO
	KCNA6	ENST00000433855.1	CCDS8534.1	529	33	0.0623819	2	PER1=14aa(369-382),PER2=19aa(444-462)	Family-wise	546.para.2	KCNA1;KCNA2;KCNA3;KCNA6;KCNA4;KCNA5;KCNA7;KCNA10	NO
	KCNA7	ENST00000221444.1	CCDS12755.1	456	33	0.0723684	2	PER1=14aa(305-318),PER2=19aa(380-398)	Family-wise	546.para.2	KCNA1;KCNA2;KCNA3;KCNA6;KCNA4;KCNA5;KCNA7;KCNA10	NO
	KCNB2	ENST00000523207.1	CCDS6209.1	911	37	0.0406147	3	PER1=14aa(206-219),PER2=9aa(331-339),PER3=14aa(376-389)	Family-wise	1473.para.2	KCNB2;KCNB1	NO
	KCND1	ENST00000218176.3	CCDS14314.1	647	18	0.0278207	2	PER1=9aa(363-371),PER2=9aa(388-396)	Family-wise	546.para.1	KCND3;KCND2;KCND1	NO
	KCND2	ENST00000331113.4	CCDS5776.1	630	18	0.0285714	2	PER1=9aa(361-369),PER2=9aa(386-394)	Family-wise	546.para.1	KCND3;KCND2;KCND1	NO
	KCND3	ENST00000315987.2	CCDS843.1	655	18	0.0274809	2	PER1=9aa(358-366),PER2=9aa(383-391)	Family-wise	546.para.1	KCND3;KCND2;KCND1	NO
	KCNH1	ENST00000271751.4	CCDS1496.1	989	123	0.124368	7	PER1=14aa(227-240),PER2=19aa(347-365),PER3=24aa(386-409),PER4=29aa(449-477),PER5=19aa(489-507),PER6=9aa(609-617),PER7=9aa(636-644)	Family-wise	933.para.1	CNGA3;CNGA1;CNGA2;CNGA4;CNGB3;HCN1;HCN2;HCN3;KCNH8;KCNH4;KCNH3;KCNH2;KCNH6;KCNH7;KCNH1;KCNH5	NO
	KCNH2	ENST00000262186.5	CCDS5910.1	1159	123	0.106126	7	PER1=14aa(417-430),PER2=19aa(518-536),PER3=24aa(557-580),PER4=29aa(610-638),PER5=19aa(650-668),PER6=9aa(770-778),PER7=9aa(797-805)	Family-wise	933.para.1	CNGA3;CNGA1;CNGA2;CNGA4;CNGB3;HCN1;HCN2;HCN3;KCNH8;KCNH4;KCNH3;KCNH2;KCNH6;KCNH7;KCNH1;KCNH5	NO
	KCNH3	ENST00000257981.6	CCDS8786.1	1083	123	0.113573	7	PER1=14aa(234-247),PER2=19aa(328-346),PER3=24aa(367-390),PER4=29aa(451-479),PER5=19aa(491-509),PER6=9aa(610-618),PER7=9aa(637-645)	Family-wise	933.para.1	CNGA3;CNGA1;CNGA2;CNGA4;CNGB3;HCN1;HCN2;HCN3;KCNH8;KCNH4;KCNH3;KCNH2;KCNH6;KCNH7;KCNH1;KCNH5	NO
	KCNH4	ENST00000264661.3	CCDS11420.1	1017	123	0.120944	7	PER1=14aa(236-249),PER2=19aa(330-348),PER3=24aa(369-392),PER4=29aa(425-453),PER5=19aa(465-483),PER6=9aa(584-592),PER7=9aa(611-619)	Family-wise	933.para.1	CNGA3;CNGA1;CNGA2;CNGA4;CNGB3;HCN1;HCN2;HCN3;KCNH8;KCNH4;KCNH3;KCNH2;KCNH6;KCNH7;KCNH1;KCNH5	NO
	KCNH5	ENST00000322893.7	CCDS9756.1	988	123	0.124494	7	PER1=14aa(224-237),PER2=19aa(317-335),PER3=24aa(356-379),PER4=29aa(418-446),PER5=19aa(458-476),PER6=9aa(578-586),PER7=9aa(605-613)	Family-wise	933.para.1	CNGA3;CNGA1;CNGA2;CNGA4;CNGB3;HCN1;HCN2;HCN3;KCNH8;KCNH4;KCNH3;KCNH2;KCNH6;KCNH7;KCNH1;KCNH5	NO
	KCNH6	ENST00000583023.1	CCDS11638.1	994	123	0.123742	7	PER1=14aa(266-279),PER2=19aa(369-387),PER3=24aa(408-431),PER4=29aa(462-490),PER5=19aa(502-520),PER6=9aa(622-630),PER7=9aa(649-657)	Family-wise	933.para.1	CNGA3;CNGA1;CNGA2;CNGA4;CNGB3;HCN1;HCN2;HCN3;KCNH8;KCNH4;KCNH3;KCNH2;KCNH6;KCNH7;KCNH1;KCNH5	NO
	KCNH7	ENST00000332142.5	CCDS2219.1	1196	123	0.102843	7	PER1=14aa(417-430),PER2=19aa(520-538),PER3=24aa(559-582),PER4=29aa(613-641),PER5=19aa(653-671),PER6=9aa(773-781),PER7=9aa(800-808)	Family-wise	933.para.1	CNGA3;CNGA1;CNGA2;CNGA4;CNGB3;HCN1;HCN2;HCN3;KCNH8;KCNH4;KCNH3;KCNH2;KCNH6;KCNH7;KCNH1;KCNH5	NO
	KCNH8	ENST00000328405.2	CCDS2632.1	1107	123	0.111111	7	PER1=14aa(231-244),PER2=19aa(324-342),PER3=24aa(363-386),PER4=29aa(420-448),PER5=19aa(460-478),PER6=9aa(579-587),PER7=9aa(606-614)	Family-wise	933.para.1	CNGA3;CNGA1;CNGA2;CNGA4;CNGB3;HCN1;HCN2;HCN3;KCNH8;KCNH4;KCNH3;KCNH2;KCNH6;KCNH7;KCNH1;KCNH5	NO
	KCNJ1	ENST00000392664.2	CCDS8476.1	391	89	0.227621	6	PER1=19aa(64-82),PER2=9aa(89-97),PER3=14aa(134-147),PER4=14aa(179-192),PER5=14aa(209-222),PER6=19aa(293-311)	Family-wise	646.para.1	KCNJ6;KCNJ5;KCNJ9;KCNJ3;KCNJ18;KCNJ12;KCNJ2;KCNJ4;KCNJ14;KCNJ11;KCNJ8;KCNJ10;KCNJ15;KCNJ1;KCNJ16	NO
	KCNJ10	ENST00000368089.3	CCDS1193.1	379	89	0.234828	6	PER1=19aa(51-69),PER2=9aa(76-84),PER3=14aa(121-134),PER4=14aa(166-179),PER5=14aa(196-209),PER6=19aa(279-297)	Family-wise	646.para.1	KCNJ6;KCNJ5;KCNJ9;KCNJ3;KCNJ18;KCNJ12;KCNJ2;KCNJ4;KCNJ14;KCNJ11;KCNJ8;KCNJ10;KCNJ15;KCNJ1;KCNJ16	NO
	KCNJ11	ENST00000339994.4	CCDS31436.1	390	89	0.228205	6	PER1=19aa(55-73),PER2=9aa(80-88),PER3=14aa(123-136),PER4=14aa(168-181),PER5=14aa(198-211),PER6=19aa(283-301)	Family-wise	646.para.1	KCNJ6;KCNJ5;KCNJ9;KCNJ3;KCNJ18;KCNJ12;KCNJ2;KCNJ4;KCNJ14;KCNJ11;KCNJ8;KCNJ10;KCNJ15;KCNJ1;KCNJ16	NO
	KCNJ12	ENST00000583088.1	CCDS11219.1	433	89	0.205543	6	PER1=19aa(67-85),PER2=9aa(92-100),PER3=14aa(136-149),PER4=14aa(181-194),PER5=14aa(211-224),PER6=19aa(295-313)	Family-wise	646.para.1	KCNJ6;KCNJ5;KCNJ9;KCNJ3;KCNJ18;KCNJ12;KCNJ2;KCNJ4;KCNJ14;KCNJ11;KCNJ8;KCNJ10;KCNJ15;KCNJ1;KCNJ16	NO
	KCNJ14	ENST00000391884.1	CCDS12721.1	436	89	0.204128	6	PER1=19aa(73-91),PER2=9aa(98-106),PER3=14aa(140-153),PER4=14aa(185-198),PER5=14aa(215-228),PER6=19aa(299-317)	Family-wise	646.para.1	KCNJ6;KCNJ5;KCNJ9;KCNJ3;KCNJ18;KCNJ12;KCNJ2;KCNJ4;KCNJ14;KCNJ11;KCNJ8;KCNJ10;KCNJ15;KCNJ1;KCNJ16	NO
	KCNJ15	ENST00000328656.4	CCDS13656.1	375	89	0.237333	6	PER1=19aa(50-68),PER2=9aa(75-83),PER3=14aa(120-133),PER4=14aa(165-178),PER5=14aa(195-208),PER6=19aa(279-297)	Family-wise	646.para.1	KCNJ6;KCNJ5;KCNJ9;KCNJ3;KCNJ18;KCNJ12;KCNJ2;KCNJ4;KCNJ14;KCNJ11;KCNJ8;KCNJ10;KCNJ15;KCNJ1;KCNJ16	NO
	KCNJ16	ENST00000392670.1	CCDS74141.1	453	89	0.196468	6	PER1=19aa(92-110),PER2=9aa(117-125),PER3=14aa(159-172),PER4=14aa(204-217),PER5=14aa(234-247),PER6=19aa(313-331)	Family-wise	646.para.1	KCNJ6;KCNJ5;KCNJ9;KCNJ3;KCNJ18;KCNJ12;KCNJ2;KCNJ4;KCNJ14;KCNJ11;KCNJ8;KCNJ10;KCNJ15;KCNJ1;KCNJ16	NO
	KCNJ18	#N/A	CCDS74015.1	433	89	0.205543	6	PER1=19aa(67-85),PER2=9aa(92-100),PER3=14aa(136-149),PER4=14aa(181-194),PER5=14aa(211-224),PER6=19aa(295-313)	Family-wise	646.para.1	KCNJ6;KCNJ5;KCNJ9;KCNJ3;KCNJ18;KCNJ12;KCNJ2;KCNJ4;KCNJ14;KCNJ11;KCNJ8;KCNJ10;KCNJ15;KCNJ1;KCNJ16	NO
	KCNJ2	ENST00000243457.3	CCDS11688.1	427	89	0.208431	6	PER1=19aa(68-86),PER2=9aa(93-101),PER3=14aa(135-148),PER4=14aa(180-193),PER5=14aa(210-223),PER6=19aa(294-312)	Family-wise	646.para.1	KCNJ6;KCNJ5;KCNJ9;KCNJ3;KCNJ18;KCNJ12;KCNJ2;KCNJ4;KCNJ14;KCNJ11;KCNJ8;KCNJ10;KCNJ15;KCNJ1;KCNJ16	NO
	KCNJ3	ENST00000295101.2	CCDS2200.1	501	89	0.177645	6	PER1=19aa(67-85),PER2=9aa(92-100),PER3=14aa(136-149),PER4=14aa(181-194),PER5=14aa(211-224),PER6=19aa(295-313)	Family-wise	646.para.1	KCNJ6;KCNJ5;KCNJ9;KCNJ3;KCNJ18;KCNJ12;KCNJ2;KCNJ4;KCNJ14;KCNJ11;KCNJ8;KCNJ10;KCNJ15;KCNJ1;KCNJ16	NO
	KCNJ4	ENST00000303592.3	CCDS13971.1	445	89	0.2	6	PER1=19aa(42-60),PER2=9aa(67-75),PER3=14aa(127-140),PER4=14aa(172-185),PER5=14aa(202-215),PER6=19aa(286-304)	Family-wise	646.para.1	KCNJ6;KCNJ5;KCNJ9;KCNJ3;KCNJ18;KCNJ12;KCNJ2;KCNJ4;KCNJ14;KCNJ11;KCNJ8;KCNJ10;KCNJ15;KCNJ1;KCNJ16	NO
	KCNJ5	ENST00000529694.1	CCDS8479.1	419	89	0.212411	6	PER1=19aa(73-91),PER2=9aa(98-106),PER3=14aa(142-155),PER4=14aa(187-200),PER5=14aa(217-230),PER6=19aa(301-319)	Family-wise	646.para.1	KCNJ6;KCNJ5;KCNJ9;KCNJ3;KCNJ18;KCNJ12;KCNJ2;KCNJ4;KCNJ14;KCNJ11;KCNJ8;KCNJ10;KCNJ15;KCNJ1;KCNJ16	NO
	KCNJ6	ENST00000609713.1	CCDS42927.1	423	89	0.210402	6	PER1=19aa(76-94),PER2=9aa(101-109),PER3=14aa(145-158),PER4=14aa(190-203),PER5=14aa(220-233),PER6=19aa(304-322)	Family-wise	646.para.1	KCNJ6;KCNJ5;KCNJ9;KCNJ3;KCNJ18;KCNJ12;KCNJ2;KCNJ4;KCNJ14;KCNJ11;KCNJ8;KCNJ10;KCNJ15;KCNJ1;KCNJ16	NO
	KCNJ8	ENST00000240662.2	CCDS8692.1	424	89	0.209906	6	PER1=19aa(56-74),PER2=9aa(81-89),PER3=14aa(133-146),PER4=14aa(178-191),PER5=14aa(208-221),PER6=19aa(292-310)	Family-wise	646.para.1	KCNJ6;KCNJ5;KCNJ9;KCNJ3;KCNJ18;KCNJ12;KCNJ2;KCNJ4;KCNJ14;KCNJ11;KCNJ8;KCNJ10;KCNJ15;KCNJ1;KCNJ16	NO
	KCNJ9	ENST00000368088.3	CCDS1194.1	393	89	0.226463	6	PER1=19aa(44-62),PER2=9aa(69-77),PER3=14aa(113-126),PER4=14aa(158-171),PER5=14aa(188-201),PER6=19aa(272-290)	Family-wise	646.para.1	KCNJ6;KCNJ5;KCNJ9;KCNJ3;KCNJ18;KCNJ12;KCNJ2;KCNJ4;KCNJ14;KCNJ11;KCNJ8;KCNJ10;KCNJ15;KCNJ1;KCNJ16	NO
	KCNQ2	ENST00000359125.2	CCDS13520.1	872	109	0.125	6	PER1=24aa(195-218),PER2=9aa(245-253),PER3=39aa(260-298),PER4=19aa(300-318),PER5=9aa(325-333),PER6=9aa(335-343)	Family-wise	3052.para.1	KCNQ2;KCNQ3;KCNQ5	NO
	KCNQ5	ENST00000342056.2	CCDS55034.1	951	109	0.114616	6	PER1=24aa(229-252),PER2=9aa(279-287),PER3=39aa(294-332),PER4=19aa(334-352),PER5=9aa(359-367),PER6=9aa(369-377)	Family-wise	3052.para.1	KCNQ2;KCNQ3;KCNQ5	NO
	KDM5A	ENST00000399788.2	CCDS41736.1	1690	9	0.00532544	1	PER1=9aa(469-477)	Family-wise	844.para.1	KDM5D;KDM5C;KDM5A;KDM5B	NO
	KDM5B	ENST00000367265.3	CCDS30974.1	1544	9	0.00582902	1	PER1=9aa(485-493)	Family-wise	844.para.1	KDM5D;KDM5C;KDM5A;KDM5B	NO
	KDM5C	ENST00000375401.3	CCDS14351.1	1560	9	0.00576923	1	PER1=9aa(500-508)	Family-wise	844.para.1	KDM5D;KDM5C;KDM5A;KDM5B	NO
	KDM5D	ENST00000317961.4	CCDS55555.1	1570	9	0.00573248	1	PER1=9aa(521-529)	Family-wise	844.para.1	KDM5D;KDM5C;KDM5A;KDM5B	NO
	KDR	ENST00000263923.4	CCDS3497.1	1356	41	0.030236	4	PER1=9aa(1010-1018),PER2=14aa(1025-1038),PER3=9aa(1040-1048),PER4=9aa(1095-1103)	Family-wise	683.para.1	FLT1;KDR;FLT4	NO
	KDSR	ENST00000406396.3	CCDS11982.1	332	9	0.0271084	1	PER1=9aa(184-192)	Family-wise	1183.para.1	HSD11B2;HSD17B2;RDH16;HSD17B6;RDH5;SDR9C7;DHRS9;BDH1;HSD17B1;RDH8;DHRS7C;DHRS7B;DHRS7;KDSR	NO
	KEAP1	ENST00000171111.5	CCDS12239.1	624	14	0.0224359	1	PER1=14aa(454-467)	Family-wise	250.para.1	KLHL2;KLHL3;KLHL17;KLHL20;KLHL12;KLHL5;KLHL1;KLHL4;KLHL28;KLHL18;KLHL8;KEAP1;KLHL10	NO
	KEL	ENST00000355265.2	CCDS34766.1	732	9	0.0122951	1	PER1=9aa(637-645)	Family-wise	2595.para.1	MMEL1;MME;ECE1;ECE2;PHEX;ECEL1;KEL	NO
	KIF1B	ENST00000263934.6	CCDS111.1	1770	46	0.0259887	4	PER1=9aa(96-104),PER2=9aa(211-219),PER3=14aa(246-259),PER4=14aa(266-279)	Family-wise	1288.para.3	KIF1B;KIF1A	NO
	KIF2B	ENST00000268919.4	CCDS32685.1	673	9	0.013373	1	PER1=9aa(303-311)	Family-wise	2644.para.1	KIF2C;KIF2A;KIF2B	NO
	KIF2C	ENST00000372224.4	CCDS512.1	725	9	0.0124138	1	PER1=9aa(348-356)	Family-wise	2644.para.1	KIF2C;KIF2A;KIF2B	NO
	KIF5B	ENST00000302418.4	CCDS7171.1	963	37	0.0384216	3	PER1=9aa(229-237),PER2=14aa(249-262),PER3=14aa(273-286)	Family-wise	3385.para.3	KIF5C;KIF5B;KIF5A	NO
	KIF5C	ENST00000435030.1	CCDS74586.1	957	37	0.0386625	3	PER1=9aa(230-238),PER2=14aa(250-263),PER3=14aa(275-288)	Family-wise	3385.para.3	KIF5C;KIF5B;KIF5A	NO
	KIT	ENST00000288135.5	CCDS3496.1	976	111	0.11373	8	PER1=13aa(551-563),PER2=14aa(634-647),PER3=14aa(649-662),PER4=9aa(664-672),PER5=19aa(783-801),PER6=24aa(803-826),PER7=9aa(833-841),PER8=9aa(863-871)	Family-wise	683.para.3	CSF1R;KIT;PDGFRA;PDGFRB;FLT3	NO
	KLF12	ENST00000377669.2	CCDS9449.1	402	19	0.0472637	1	PER1=19aa(361-379)	Family-wise	2825.para.1	KLF2;KLF4;KLF1;KLF5;KLF3;KLF12;KLF8;KLF17	NO
	KLF17	ENST00000372299.3	CCDS508.1	389	19	0.0488432	1	PER1=19aa(327-345)	Family-wise	2825.para.1	KLF2;KLF4;KLF1;KLF5;KLF3;KLF12;KLF8;KLF17	NO
	KLF2	ENST00000248071.5	CCDS12343.1	355	19	0.0535211	1	PER1=19aa(316-334)	Family-wise	2825.para.1	KLF2;KLF4;KLF1;KLF5;KLF3;KLF12;KLF8;KLF17	NO
	KLF3	ENST00000261438.5	CCDS3444.1	345	19	0.0550725	1	PER1=19aa(304-322)	Family-wise	2825.para.1	KLF2;KLF4;KLF1;KLF5;KLF3;KLF12;KLF8;KLF17	NO
	KLF4	ENST00000374672.4	CCDS6770.2	479	19	0.039666	1	PER1=19aa(440-458)	Family-wise	2825.para.1	KLF2;KLF4;KLF1;KLF5;KLF3;KLF12;KLF8;KLF17	NO
	KLF5	ENST00000377687.4	CCDS9448.1	457	19	0.0415755	1	PER1=19aa(417-435)	Family-wise	2825.para.1	KLF2;KLF4;KLF1;KLF5;KLF3;KLF12;KLF8;KLF17	NO
	KLF8	ENST00000468660.1	CCDS14373.1	359	19	0.0529248	1	PER1=19aa(318-336)	Family-wise	2825.para.1	KLF2;KLF4;KLF1;KLF5;KLF3;KLF12;KLF8;KLF17	NO
	KLHL1	ENST00000377844.4	CCDS9445.1	748	14	0.0187166	1	PER1=14aa(584-597)	Family-wise	250.para.1	KLHL2;KLHL3;KLHL17;KLHL20;KLHL12;KLHL5;KLHL1;KLHL4;KLHL28;KLHL18;KLHL8;KEAP1;KLHL10	NO
	KLHL10	ENST00000293303.4	CCDS42340.1	608	14	0.0230263	1	PER1=14aa(417-430)	Family-wise	250.para.1	KLHL2;KLHL3;KLHL17;KLHL20;KLHL12;KLHL5;KLHL1;KLHL4;KLHL28;KLHL18;KLHL8;KEAP1;KLHL10	NO
	KLHL12	ENST00000367261.3	CCDS1429.1	568	14	0.0246479	1	PER1=14aa(410-423)	Family-wise	250.para.1	KLHL2;KLHL3;KLHL17;KLHL20;KLHL12;KLHL5;KLHL1;KLHL4;KLHL28;KLHL18;KLHL8;KEAP1;KLHL10	NO
	KLHL17	ENST00000338591.3	CCDS30550.1	642	14	0.0218069	1	PER1=14aa(467-480)	Family-wise	250.para.1	KLHL2;KLHL3;KLHL17;KLHL20;KLHL12;KLHL5;KLHL1;KLHL4;KLHL28;KLHL18;KLHL8;KEAP1;KLHL10	NO
	KLHL18	ENST00000232766.5	CCDS33749.1	574	14	0.0243902	1	PER1=14aa(414-427)	Family-wise	250.para.1	KLHL2;KLHL3;KLHL17;KLHL20;KLHL12;KLHL5;KLHL1;KLHL4;KLHL28;KLHL18;KLHL8;KEAP1;KLHL10	NO
	KLHL2	ENST00000514860.1	CCDS54815.1	597	14	0.0234506	1	PER1=14aa(435-448)	Family-wise	250.para.1	KLHL2;KLHL3;KLHL17;KLHL20;KLHL12;KLHL5;KLHL1;KLHL4;KLHL28;KLHL18;KLHL8;KEAP1;KLHL10	NO
	KLHL20	ENST00000209884.4	CCDS1310.1	609	14	0.0229885	1	PER1=14aa(444-457)	Family-wise	250.para.1	KLHL2;KLHL3;KLHL17;KLHL20;KLHL12;KLHL5;KLHL1;KLHL4;KLHL28;KLHL18;KLHL8;KEAP1;KLHL10	NO
	KLHL28	ENST00000396128.4	CCDS76675.1	585	14	0.0239316	1	PER1=14aa(431-444)	Family-wise	250.para.1	KLHL2;KLHL3;KLHL17;KLHL20;KLHL12;KLHL5;KLHL1;KLHL4;KLHL28;KLHL18;KLHL8;KEAP1;KLHL10	NO
	KLHL3	ENST00000309755.4	CCDS4192.1	587	14	0.0238501	1	PER1=14aa(425-438)	Family-wise	250.para.1	KLHL2;KLHL3;KLHL17;KLHL20;KLHL12;KLHL5;KLHL1;KLHL4;KLHL28;KLHL18;KLHL8;KEAP1;KLHL10	NO
	KLHL4	ENST00000373114.4	CCDS14456.1	720	14	0.0194444	1	PER1=14aa(554-567)	Family-wise	250.para.1	KLHL2;KLHL3;KLHL17;KLHL20;KLHL12;KLHL5;KLHL1;KLHL4;KLHL28;KLHL18;KLHL8;KEAP1;KLHL10	NO
	KLHL5	ENST00000504108.1	CCDS33974.1	755	14	0.018543	1	PER1=14aa(592-605)	Family-wise	250.para.1	KLHL2;KLHL3;KLHL17;KLHL20;KLHL12;KLHL5;KLHL1;KLHL4;KLHL28;KLHL18;KLHL8;KEAP1;KLHL10	NO
	KLHL7	ENST00000339077.5	CCDS34609.1	586	9	0.0153584	1	PER1=9aa(61-69)	Family-wise	3288.para.1	IPP;KLHL7;GAN;IVNS1ABP	NO
	KLHL8	ENST00000273963.5	CCDS3617.1	620	14	0.0225806	1	PER1=14aa(444-457)	Family-wise	250.para.1	KLHL2;KLHL3;KLHL17;KLHL20;KLHL12;KLHL5;KLHL1;KLHL4;KLHL28;KLHL18;KLHL8;KEAP1;KLHL10	NO
	KRAS	ENST00000256078.4	CCDS8703.1	189	33	0.174603	2	PER1=19aa(8-26),PER2=14aa(53-66)	Family-wise	3537.para.2	RRAS2;RRAS;MRAS;NRAS;KRAS;HRAS;RALB;RALA;ERAS	NO
	KRT15	ENST00000254043.3	CCDS11398.1	456	48	0.105263	2	PER1=24aa(105-128),PER2=24aa(392-415)	Family-wise	1898.para.1	KRT15;KRT13;KRT14;KRT16;KRT17;KRT19;KRT10;KRT12;KRT24;KRT27;KRT25;KRT28;KRT26;KRT33B;KRT31;KRT33A;KRT34;KRT35;KRT32;KRT36;KRT40;KRT38;KRT37;KRT39	NO
	KRT19	ENST00000361566.3	CCDS11399.1	400	48	0.12	2	PER1=24aa(80-103),PER2=24aa(366-389)	Family-wise	1898.para.1	KRT15;KRT13;KRT14;KRT16;KRT17;KRT19;KRT10;KRT12;KRT24;KRT27;KRT25;KRT28;KRT26;KRT33B;KRT31;KRT33A;KRT34;KRT35;KRT32;KRT36;KRT40;KRT38;KRT37;KRT39	NO
	KRT24	ENST00000264651.2	CCDS11372.1	525	48	0.0914286	2	PER1=24aa(140-163),PER2=24aa(431-454)	Family-wise	1898.para.1	KRT15;KRT13;KRT14;KRT16;KRT17;KRT19;KRT10;KRT12;KRT24;KRT27;KRT25;KRT28;KRT26;KRT33B;KRT31;KRT33A;KRT34;KRT35;KRT32;KRT36;KRT40;KRT38;KRT37;KRT39	NO
	KRT25	ENST00000312150.4	CCDS11373.1	450	48	0.106667	2	PER1=24aa(79-102),PER2=24aa(369-392)	Family-wise	1898.para.1	KRT15;KRT13;KRT14;KRT16;KRT17;KRT19;KRT10;KRT12;KRT24;KRT27;KRT25;KRT28;KRT26;KRT33B;KRT31;KRT33A;KRT34;KRT35;KRT32;KRT36;KRT40;KRT38;KRT37;KRT39	NO
	KRT26	ENST00000335552.4	CCDS11374.1	468	48	0.102564	2	PER1=24aa(83-106),PER2=24aa(373-396)	Family-wise	1898.para.1	KRT15;KRT13;KRT14;KRT16;KRT17;KRT19;KRT10;KRT12;KRT24;KRT27;KRT25;KRT28;KRT26;KRT33B;KRT31;KRT33A;KRT34;KRT35;KRT32;KRT36;KRT40;KRT38;KRT37;KRT39	NO
	KRT27	ENST00000301656.3	CCDS11375.1	459	48	0.104575	2	PER1=24aa(84-107),PER2=24aa(374-397)	Family-wise	1898.para.1	KRT15;KRT13;KRT14;KRT16;KRT17;KRT19;KRT10;KRT12;KRT24;KRT27;KRT25;KRT28;KRT26;KRT33B;KRT31;KRT33A;KRT34;KRT35;KRT32;KRT36;KRT40;KRT38;KRT37;KRT39	NO
	KRT28	ENST00000306658.7	CCDS11376.1	464	48	0.103448	2	PER1=24aa(86-109),PER2=24aa(376-399)	Family-wise	1898.para.1	KRT15;KRT13;KRT14;KRT16;KRT17;KRT19;KRT10;KRT12;KRT24;KRT27;KRT25;KRT28;KRT26;KRT33B;KRT31;KRT33A;KRT34;KRT35;KRT32;KRT36;KRT40;KRT38;KRT37;KRT39	NO
	KRT3	ENST00000417996.2	CCDS44895.1	628	57	0.0907643	3	PER1=24aa(194-217),PER2=9aa(354-362),PER3=24aa(494-517)	Family-wise	3342.para.1	KRT3;KRT76;KRT4;KRT6C;KRT6B;KRT6A;KRT5;KRT75;KRT79;KRT1;KRT2;KRT7;KRT73;KRT71;KRT72;KRT74;KRT8;KRT77;KRT81;KRT83;KRT86;KRT85;KRT84;KRT82	NO
	KRT31	ENST00000251645.2	CCDS11391.1	416	48	0.115385	2	PER1=24aa(56-79),PER2=24aa(342-365)	Family-wise	1898.para.1	KRT15;KRT13;KRT14;KRT16;KRT17;KRT19;KRT10;KRT12;KRT24;KRT27;KRT25;KRT28;KRT26;KRT33B;KRT31;KRT33A;KRT34;KRT35;KRT32;KRT36;KRT40;KRT38;KRT37;KRT39	NO
	KRT32	ENST00000225899.3	CCDS11393.1	448	48	0.107143	2	PER1=24aa(96-119),PER2=24aa(382-405)	Family-wise	1898.para.1	KRT15;KRT13;KRT14;KRT16;KRT17;KRT19;KRT10;KRT12;KRT24;KRT27;KRT25;KRT28;KRT26;KRT33B;KRT31;KRT33A;KRT34;KRT35;KRT32;KRT36;KRT40;KRT38;KRT37;KRT39	NO
	KRT33A	ENST00000007735.3	CCDS11388.1	404	48	0.118812	2	PER1=24aa(56-79),PER2=24aa(342-365)	Family-wise	1898.para.1	KRT15;KRT13;KRT14;KRT16;KRT17;KRT19;KRT10;KRT12;KRT24;KRT27;KRT25;KRT28;KRT26;KRT33B;KRT31;KRT33A;KRT34;KRT35;KRT32;KRT36;KRT40;KRT38;KRT37;KRT39	NO
	KRT33B	ENST00000251646.3	CCDS11389.1	404	48	0.118812	2	PER1=24aa(56-79),PER2=24aa(342-365)	Family-wise	1898.para.1	KRT15;KRT13;KRT14;KRT16;KRT17;KRT19;KRT10;KRT12;KRT24;KRT27;KRT25;KRT28;KRT26;KRT33B;KRT31;KRT33A;KRT34;KRT35;KRT32;KRT36;KRT40;KRT38;KRT37;KRT39	NO
	KRT34	ENST00000394001.1	CCDS11390.1	436	48	0.110092	2	PER1=24aa(98-121),PER2=24aa(384-407)	Family-wise	1898.para.1	KRT15;KRT13;KRT14;KRT16;KRT17;KRT19;KRT10;KRT12;KRT24;KRT27;KRT25;KRT28;KRT26;KRT33B;KRT31;KRT33A;KRT34;KRT35;KRT32;KRT36;KRT40;KRT38;KRT37;KRT39	NO
	KRT35	ENST00000393989.1	CCDS11394.2	455	48	0.105495	2	PER1=24aa(97-120),PER2=24aa(383-406)	Family-wise	1898.para.1	KRT15;KRT13;KRT14;KRT16;KRT17;KRT19;KRT10;KRT12;KRT24;KRT27;KRT25;KRT28;KRT26;KRT33B;KRT31;KRT33A;KRT34;KRT35;KRT32;KRT36;KRT40;KRT38;KRT37;KRT39	NO
	KRT36	ENST00000328119.6	CCDS11395.1	467	48	0.102784	2	PER1=24aa(93-116),PER2=24aa(379-402)	Family-wise	1898.para.1	KRT15;KRT13;KRT14;KRT16;KRT17;KRT19;KRT10;KRT12;KRT24;KRT27;KRT25;KRT28;KRT26;KRT33B;KRT31;KRT33A;KRT34;KRT35;KRT32;KRT36;KRT40;KRT38;KRT37;KRT39	NO
	KRT37	ENST00000225550.3	CCDS32653.1	449	48	0.106904	2	PER1=24aa(104-127),PER2=24aa(390-413)	Family-wise	1898.para.1	KRT15;KRT13;KRT14;KRT16;KRT17;KRT19;KRT10;KRT12;KRT24;KRT27;KRT25;KRT28;KRT26;KRT33B;KRT31;KRT33A;KRT34;KRT35;KRT32;KRT36;KRT40;KRT38;KRT37;KRT39	NO
	KRT38	ENST00000246646.3	CCDS11392.1	456	48	0.105263	2	PER1=24aa(104-127),PER2=24aa(390-413)	Family-wise	1898.para.1	KRT15;KRT13;KRT14;KRT16;KRT17;KRT19;KRT10;KRT12;KRT24;KRT27;KRT25;KRT28;KRT26;KRT33B;KRT31;KRT33A;KRT34;KRT35;KRT32;KRT36;KRT40;KRT38;KRT37;KRT39	NO
	KRT39	ENST00000355612.2	CCDS11382.1	491	48	0.0977597	2	PER1=24aa(96-119),PER2=24aa(382-405)	Family-wise	1898.para.1	KRT15;KRT13;KRT14;KRT16;KRT17;KRT19;KRT10;KRT12;KRT24;KRT27;KRT25;KRT28;KRT26;KRT33B;KRT31;KRT33A;KRT34;KRT35;KRT32;KRT36;KRT40;KRT38;KRT37;KRT39	NO
	KRT4	ENST00000551956.1	CCDS41787.2	520	57	0.109615	3	PER1=24aa(133-156),PER2=9aa(291-299),PER3=24aa(431-454)	Family-wise	3342.para.1	KRT3;KRT76;KRT4;KRT6C;KRT6B;KRT6A;KRT5;KRT75;KRT79;KRT1;KRT2;KRT7;KRT73;KRT71;KRT72;KRT74;KRT8;KRT77;KRT81;KRT83;KRT86;KRT85;KRT84;KRT82	NO
	KRT40	ENST00000377755.4	CCDS42320.1	431	48	0.111369	2	PER1=24aa(89-112),PER2=24aa(375-398)	Family-wise	1898.para.1	KRT15;KRT13;KRT14;KRT16;KRT17;KRT19;KRT10;KRT12;KRT24;KRT27;KRT25;KRT28;KRT26;KRT33B;KRT31;KRT33A;KRT34;KRT35;KRT32;KRT36;KRT40;KRT38;KRT37;KRT39	NO
	KRT6B	ENST00000252252.3	CCDS8828.1	564	57	0.101064	3	PER1=24aa(159-182),PER2=9aa(317-325),PER3=24aa(457-480)	Family-wise	3342.para.1	KRT3;KRT76;KRT4;KRT6C;KRT6B;KRT6A;KRT5;KRT75;KRT79;KRT1;KRT2;KRT7;KRT73;KRT71;KRT72;KRT74;KRT8;KRT77;KRT81;KRT83;KRT86;KRT85;KRT84;KRT82	NO
	KRT7	ENST00000331817.5	CCDS8822.1	469	57	0.121535	3	PER1=24aa(87-110),PER2=9aa(244-252),PER3=24aa(384-407)	Family-wise	3342.para.1	KRT3;KRT76;KRT4;KRT6C;KRT6B;KRT6A;KRT5;KRT75;KRT79;KRT1;KRT2;KRT7;KRT73;KRT71;KRT72;KRT74;KRT8;KRT77;KRT81;KRT83;KRT86;KRT85;KRT84;KRT82	NO
	KRT71	ENST00000267119.5	CCDS8831.1	523	57	0.108987	3	PER1=24aa(126-149),PER2=9aa(284-292),PER3=24aa(424-447)	Family-wise	3342.para.1	KRT3;KRT76;KRT4;KRT6C;KRT6B;KRT6A;KRT5;KRT75;KRT79;KRT1;KRT2;KRT7;KRT73;KRT71;KRT72;KRT74;KRT8;KRT77;KRT81;KRT83;KRT86;KRT85;KRT84;KRT82	NO
	KRT72	ENST00000293745.2	CCDS8833.1	511	57	0.111546	3	PER1=24aa(121-144),PER2=9aa(279-287),PER3=24aa(419-442)	Family-wise	3342.para.1	KRT3;KRT76;KRT4;KRT6C;KRT6B;KRT6A;KRT5;KRT75;KRT79;KRT1;KRT2;KRT7;KRT73;KRT71;KRT72;KRT74;KRT8;KRT77;KRT81;KRT83;KRT86;KRT85;KRT84;KRT82	NO
	KRT73	ENST00000305748.3	CCDS8834.1	540	57	0.105556	3	PER1=24aa(128-151),PER2=9aa(286-294),PER3=24aa(426-449)	Family-wise	3342.para.1	KRT3;KRT76;KRT4;KRT6C;KRT6B;KRT6A;KRT5;KRT75;KRT79;KRT1;KRT2;KRT7;KRT73;KRT71;KRT72;KRT74;KRT8;KRT77;KRT81;KRT83;KRT86;KRT85;KRT84;KRT82	NO
	KRT74	ENST00000305620.2	CCDS8832.1	529	57	0.10775	3	PER1=24aa(136-159),PER2=9aa(294-302),PER3=24aa(434-457)	Family-wise	3342.para.1	KRT3;KRT76;KRT4;KRT6C;KRT6B;KRT6A;KRT5;KRT75;KRT79;KRT1;KRT2;KRT7;KRT73;KRT71;KRT72;KRT74;KRT8;KRT77;KRT81;KRT83;KRT86;KRT85;KRT84;KRT82	NO
	KRT75	ENST00000252245.5	CCDS8827.1	551	57	0.103448	3	PER1=24aa(145-168),PER2=9aa(303-311),PER3=24aa(443-466)	Family-wise	3342.para.1	KRT3;KRT76;KRT4;KRT6C;KRT6B;KRT6A;KRT5;KRT75;KRT79;KRT1;KRT2;KRT7;KRT73;KRT71;KRT72;KRT74;KRT8;KRT77;KRT81;KRT83;KRT86;KRT85;KRT84;KRT82	NO
	KRT76	ENST00000332411.2	CCDS8838.1	638	57	0.0893417	3	PER1=24aa(179-202),PER2=9aa(337-345),PER3=24aa(477-500)	Family-wise	3342.para.1	KRT3;KRT76;KRT4;KRT6C;KRT6B;KRT6A;KRT5;KRT75;KRT79;KRT1;KRT2;KRT7;KRT73;KRT71;KRT72;KRT74;KRT8;KRT77;KRT81;KRT83;KRT86;KRT85;KRT84;KRT82	NO
	KRT77	ENST00000341809.3	CCDS8837.1	578	57	0.0986159	3	PER1=24aa(160-183),PER2=9aa(318-326),PER3=24aa(458-481)	Family-wise	3342.para.1	KRT3;KRT76;KRT4;KRT6C;KRT6B;KRT6A;KRT5;KRT75;KRT79;KRT1;KRT2;KRT7;KRT73;KRT71;KRT72;KRT74;KRT8;KRT77;KRT81;KRT83;KRT86;KRT85;KRT84;KRT82	NO
	KRT79	ENST00000330553.5	CCDS8839.1	535	57	0.106542	3	PER1=24aa(138-161),PER2=9aa(298-306),PER3=24aa(438-461)	Family-wise	3342.para.1	KRT3;KRT76;KRT4;KRT6C;KRT6B;KRT6A;KRT5;KRT75;KRT79;KRT1;KRT2;KRT7;KRT73;KRT71;KRT72;KRT74;KRT8;KRT77;KRT81;KRT83;KRT86;KRT85;KRT84;KRT82	NO
	KRT8	ENST00000552150.1	CCDS58234.1	511	56	0.109589	3	PER1=24aa(115-138),PER2=9aa(271-279),PER3=23aa(411-433)	Family-wise	3342.para.1	KRT3;KRT76;KRT4;KRT6C;KRT6B;KRT6A;KRT5;KRT75;KRT79;KRT1;KRT2;KRT7;KRT73;KRT71;KRT72;KRT74;KRT8;KRT77;KRT81;KRT83;KRT86;KRT85;KRT84;KRT82	NO
	KRT81	ENST00000327741.5	CCDS31805.1	505	56	0.110891	3	PER1=24aa(102-125),PER2=9aa(258-266),PER3=23aa(398-420)	Family-wise	3342.para.1	KRT3;KRT76;KRT4;KRT6C;KRT6B;KRT6A;KRT5;KRT75;KRT79;KRT1;KRT2;KRT7;KRT73;KRT71;KRT72;KRT74;KRT8;KRT77;KRT81;KRT83;KRT86;KRT85;KRT84;KRT82	NO
	KRT82	ENST00000257974.2	CCDS8826.1	513	56	0.109162	3	PER1=24aa(116-139),PER2=9aa(272-280),PER3=23aa(412-434)	Family-wise	3342.para.1	KRT3;KRT76;KRT4;KRT6C;KRT6B;KRT6A;KRT5;KRT75;KRT79;KRT1;KRT2;KRT7;KRT73;KRT71;KRT72;KRT74;KRT8;KRT77;KRT81;KRT83;KRT86;KRT85;KRT84;KRT82	NO
	KRT83	ENST00000293670.3	CCDS8823.1	493	56	0.11359	3	PER1=24aa(107-130),PER2=9aa(263-271),PER3=23aa(403-425)	Family-wise	3342.para.1	KRT3;KRT76;KRT4;KRT6C;KRT6B;KRT6A;KRT5;KRT75;KRT79;KRT1;KRT2;KRT7;KRT73;KRT71;KRT72;KRT74;KRT8;KRT77;KRT81;KRT83;KRT86;KRT85;KRT84;KRT82	NO
	KRT84	ENST00000257951.3	CCDS8825.1	600	56	0.0933333	3	PER1=24aa(161-184),PER2=9aa(317-325),PER3=23aa(457-479)	Family-wise	3342.para.1	KRT3;KRT76;KRT4;KRT6C;KRT6B;KRT6A;KRT5;KRT75;KRT79;KRT1;KRT2;KRT7;KRT73;KRT71;KRT72;KRT74;KRT8;KRT77;KRT81;KRT83;KRT86;KRT85;KRT84;KRT82	NO
	KRT85	ENST00000257901.3	CCDS8824.1	507	56	0.110454	3	PER1=24aa(119-142),PER2=9aa(275-283),PER3=23aa(415-437)	Family-wise	3342.para.1	KRT3;KRT76;KRT4;KRT6C;KRT6B;KRT6A;KRT5;KRT75;KRT79;KRT1;KRT2;KRT7;KRT73;KRT71;KRT72;KRT74;KRT8;KRT77;KRT81;KRT83;KRT86;KRT85;KRT84;KRT82	NO
	KSR1	ENST00000398988.3	CCDS58532.1	762	50	0.0656168	4	PER1=13aa(215-227),PER2=14aa(344-357),PER3=9aa(484-492),PER4=14aa(614-627)	Family-wise	1916.para.2	RAF1;ARAF;BRAF;KSR1	NO
	L1CAM	ENST00000370060.1	CCDS14733.1	1257	9	0.0071599	1	PER1=9aa(305-313)	Family-wise	155.para.1	NRCAM;NFASC;CHL1;L1CAM;CNTN2;CNTN1;CNTN3;CNTN4;CNTN6;CNTN5	NO
	LEFTY1	ENST00000272134.5	CCDS1548.1	366	9	0.0245902	1	PER1=9aa(336-344)	Family-wise	1541.para.1	LEFTY1;LEFTY2	NO
	LEFTY2	ENST00000366820.5	CCDS1549.1	366	9	0.0245902	1	PER1=9aa(336-344)	Family-wise	1541.para.1	LEFTY1;LEFTY2	NO
	LHCGR	ENST00000294954.7	CCDS1842.1	699	19	0.0271817	1	PER1=19aa(563-581)	Family-wise	1055.para.1	LHCGR;FSHR;TSHR	NO
	LINGO1	ENST00000355300.6	CCDS45313.1	620	9	0.0145161	1	PER1=9aa(284-292)	Family-wise	1274.para.4	LINGO2;LINGO1;LINGO3;LINGO4	NO
	LINGO2	ENST00000379992.2	CCDS6524.1	606	9	0.0148515	1	PER1=9aa(270-278)	Family-wise	1274.para.4	LINGO2;LINGO1;LINGO3;LINGO4	NO
	LINGO3	#N/A	CCDS45905.1	592	9	0.0152027	1	PER1=9aa(267-275)	Family-wise	1274.para.4	LINGO2;LINGO1;LINGO3;LINGO4	NO
	LINGO4	ENST00000368820.3	CCDS30855.1	593	9	0.0151771	1	PER1=9aa(273-281)	Family-wise	1274.para.4	LINGO2;LINGO1;LINGO3;LINGO4	NO
	LIPC	ENST00000356113.6	CCDS10166.1	499	14	0.0280561	1	PER1=14aa(190-203)	Family-wise	1926.para.1	LPL;LIPG;LIPC;PNLIPRP1;PNLIP;PNLIPRP3;LIPI;LIPH;PLA1A	NO
	LIPG	ENST00000261292.4	CCDS11938.1	500	14	0.028	1	PER1=14aa(189-202)	Family-wise	1926.para.1	LPL;LIPG;LIPC;PNLIPRP1;PNLIP;PNLIPRP3;LIPI;LIPH;PLA1A	NO
	LIPH	ENST00000296252.4	CCDS3272.1	451	14	0.0310421	1	PER1=14aa(174-187)	Family-wise	1926.para.1	LPL;LIPG;LIPC;PNLIPRP1;PNLIP;PNLIPRP3;LIPI;LIPH;PLA1A	NO
	LIPI	ENST00000344577.2	CCDS13564.1	481	14	0.029106	1	PER1=14aa(200-213)	Family-wise	1926.para.1	LPL;LIPG;LIPC;PNLIPRP1;PNLIP;PNLIPRP3;LIPI;LIPH;PLA1A	NO
	LMNA	ENST00000368300.4	CCDS1129.1	664	9	0.0135542	1	PER1=9aa(39-47)	Family-wise	116.para.1	LMNB1;LMNB2;LMNA	NO
	LMNB1	ENST00000261366.5	CCDS4140.1	586	9	0.0153584	1	PER1=9aa(40-48)	Family-wise	116.para.1	LMNB1;LMNB2;LMNA	NO
	LMNB2	ENST00000325327.3	CCDS12090.2	620	9	0.0145161	1	PER1=9aa(54-62)	Family-wise	116.para.1	LMNB1;LMNB2;LMNA	NO
	LMX1A	ENST00000342310.3	CCDS1247.1	382	14	0.0366492	1	PER1=14aa(236-249)	Family-wise	2349.para.2	LMX1B;LMX1A;ISL2;ISL1	NO
	LPL	ENST00000311322.8	CCDS6012.1	475	14	0.0294737	1	PER1=14aa(179-192)	Family-wise	1926.para.1	LPL;LIPG;LIPC;PNLIPRP1;PNLIP;PNLIPRP3;LIPI;LIPH;PLA1A	NO
	MACF1	ENST00000545844.1	CCDS435.1	5430	8	0.0014733	1	PER1=8aa(5223-5230)	Family-wise	1591.para.1	DST;MACF1;EPPK1	NO
	MAF	ENST00000326043.4	CCDS10928.1	403	28	0.0694789	2	PER1=19aa(55-73),PER2=9aa(298-306)	Family-wise	1186.para.2	MAFB;MAF	NO
	MAP2K1	ENST00000307102.5	CCDS10216.1	393	9	0.0229008	1	PER1=9aa(52-60)	Family-wise	2795.para.1	MAP2K1;MAP2K2	NO
	MED12	ENST00000374080.3	CCDS43970.1	2177	9	0.00413413	1	PER1=9aa(954-962)	Family-wise	505.para.1	MED12;MED12L	NO
	MED12L	ENST00000474524.1	CCDS33876.1	2145	9	0.0041958	1	PER1=9aa(911-919)	Family-wise	505.para.1	MED12;MED12L	NO
	MEF2A	ENST00000354410.5	CCDS45362.1	499	23	0.0460922	2	PER1=14aa(16-29),PER2=9aa(31-39)	Family-wise	2166.para.1	MEF2A;MEF2C;MEF2D	NO
	MEF2D	ENST00000348159.4	CCDS1143.1	521	23	0.0441459	2	PER1=14aa(16-29),PER2=9aa(31-39)	Family-wise	2166.para.1	MEF2A;MEF2C;MEF2D	NO
	MEIS1	ENST00000272369.9	CCDS46309.1	390	14	0.0358974	1	PER1=14aa(320-333)	Family-wise	473.para.1	PKNOX2;PKNOX1;MEIS1;MEIS2;MEIS3	NO
	MEIS3	ENST00000561293.1	CCDS33064.1	421	14	0.0332542	1	PER1=14aa(356-369)	Family-wise	473.para.1	PKNOX2;PKNOX1;MEIS1;MEIS2;MEIS3	NO
	MID1	ENST00000317552.4	CCDS14138.1	667	9	0.0134933	1	PER1=9aa(145-153)	Family-wise	2028.para.3	TRIM67;TRIM9;MID1;MID2;TRIM46;TRIM36	NO
	MID2	ENST00000262843.6	CCDS14532.2	735	9	0.0122449	1	PER1=9aa(165-173)	Family-wise	2028.para.3	TRIM67;TRIM9;MID1;MID2;TRIM46;TRIM36	NO
	MIP	ENST00000257979.4	CCDS8919.1	263	14	0.0532319	1	PER1=14aa(179-192)	Family-wise	2627.para.1	AQP5;AQP2;MIP;AQP6;AQP4;AQP1	NO
	MME	ENST00000460393.1	CCDS3172.1	750	9	0.012	1	PER1=9aa(650-658)	Family-wise	2595.para.1	MMEL1;MME;ECE1;ECE2;PHEX;ECEL1;KEL	NO
	MMEL1	ENST00000378412.3	CCDS30569.2	779	9	0.0115533	1	PER1=9aa(679-687)	Family-wise	2595.para.1	MMEL1;MME;ECE1;ECE2;PHEX;ECEL1;KEL	NO
	MMP1	ENST00000315274.6	CCDS8322.1	469	9	0.0191898	1	PER1=9aa(63-71)	Family-wise	1753.para.1	MMP8;MMP1;MMP10;MMP3;MMP27;MMP12;MMP13;MMP20;MMP15;MMP14;MMP24;MMP16;MMP17;MMP25;MMP11	NO
	MMP10	ENST00000279441.4	CCDS8321.1	476	9	0.0189076	1	PER1=9aa(62-70)	Family-wise	1753.para.1	MMP8;MMP1;MMP10;MMP3;MMP27;MMP12;MMP13;MMP20;MMP15;MMP14;MMP24;MMP16;MMP17;MMP25;MMP11	NO
	MMP12	#N/A	CCDS73375.1	470	9	0.0191489	1	PER1=9aa(63-71)	Family-wise	1753.para.1	MMP8;MMP1;MMP10;MMP3;MMP27;MMP12;MMP13;MMP20;MMP15;MMP14;MMP24;MMP16;MMP17;MMP25;MMP11	NO
	MMP14	ENST00000311852.6	CCDS9577.1	582	9	0.0154639	1	PER1=9aa(64-72)	Family-wise	1753.para.1	MMP8;MMP1;MMP10;MMP3;MMP27;MMP12;MMP13;MMP20;MMP15;MMP14;MMP24;MMP16;MMP17;MMP25;MMP11	NO
	MMP15	ENST00000219271.3	CCDS10792.1	669	9	0.0134529	1	PER1=9aa(82-90)	Family-wise	1753.para.1	MMP8;MMP1;MMP10;MMP3;MMP27;MMP12;MMP13;MMP20;MMP15;MMP14;MMP24;MMP16;MMP17;MMP25;MMP11	NO
	MMP16	ENST00000286614.6	CCDS6246.1	607	9	0.014827	1	PER1=9aa(72-80)	Family-wise	1753.para.1	MMP8;MMP1;MMP10;MMP3;MMP27;MMP12;MMP13;MMP20;MMP15;MMP14;MMP24;MMP16;MMP17;MMP25;MMP11	NO
	MMP17	ENST00000360564.1	CCDS31927.1	603	9	0.0149254	1	PER1=9aa(81-89)	Family-wise	1753.para.1	MMP8;MMP1;MMP10;MMP3;MMP27;MMP12;MMP13;MMP20;MMP15;MMP14;MMP24;MMP16;MMP17;MMP25;MMP11	NO
	MMP20	ENST00000260228.2	CCDS8318.1	483	9	0.0186335	1	PER1=9aa(71-79)	Family-wise	1753.para.1	MMP8;MMP1;MMP10;MMP3;MMP27;MMP12;MMP13;MMP20;MMP15;MMP14;MMP24;MMP16;MMP17;MMP25;MMP11	NO
	MMP24	ENST00000246186.6	CCDS46593.1	645	9	0.0139535	1	PER1=9aa(110-118)	Family-wise	1753.para.1	MMP8;MMP1;MMP10;MMP3;MMP27;MMP12;MMP13;MMP20;MMP15;MMP14;MMP24;MMP16;MMP17;MMP25;MMP11	NO
	MMP25	ENST00000336577.4	CCDS10492.1	562	9	0.0160142	1	PER1=9aa(61-69)	Family-wise	1753.para.1	MMP8;MMP1;MMP10;MMP3;MMP27;MMP12;MMP13;MMP20;MMP15;MMP14;MMP24;MMP16;MMP17;MMP25;MMP11	NO
	MMP27	ENST00000260229.4	CCDS8319.1	513	9	0.0175439	1	PER1=9aa(62-70)	Family-wise	1753.para.1	MMP8;MMP1;MMP10;MMP3;MMP27;MMP12;MMP13;MMP20;MMP15;MMP14;MMP24;MMP16;MMP17;MMP25;MMP11	NO
	MMP3	ENST00000299855.5	CCDS8323.1	477	9	0.0188679	1	PER1=9aa(63-71)	Family-wise	1753.para.1	MMP8;MMP1;MMP10;MMP3;MMP27;MMP12;MMP13;MMP20;MMP15;MMP14;MMP24;MMP16;MMP17;MMP25;MMP11	NO
	MMP8	ENST00000236826.3	CCDS8320.1	467	9	0.0192719	1	PER1=9aa(62-70)	Family-wise	1753.para.1	MMP8;MMP1;MMP10;MMP3;MMP27;MMP12;MMP13;MMP20;MMP15;MMP14;MMP24;MMP16;MMP17;MMP25;MMP11	NO
	MRAS	ENST00000289104.4	CCDS3100.1	208	33	0.158654	2	PER1=19aa(18-36),PER2=14aa(63-76)	Family-wise	3537.para.2	RRAS2;RRAS;MRAS;NRAS;KRAS;HRAS;RALB;RALA;ERAS	NO
	MSX1	ENST00000382723.4	CCDS3378.2	303	14	0.0462046	1	PER1=14aa(213-226)	Family-wise	1130.para.1	DLX3;DLX5;DLX2;DLX1;DLX6;DLX4;MSX1;MSX2	NO
	MSX2	ENST00000239243.6	CCDS4392.1	267	14	0.0524345	1	PER1=14aa(183-196)	Family-wise	1130.para.1	DLX3;DLX5;DLX2;DLX1;DLX6;DLX4;MSX1;MSX2	NO
	MTM1	ENST00000370396.2	CCDS14694.1	603	18	0.0298507	2	PER1=9aa(225-233),PER2=9aa(409-417)	Family-wise	2308.para.4	MTMR6;MTMR7;MTMR8;MTMR1;MTMR2;MTM1;MTMR9	NO
	MTMR1	ENST00000544228.1	CCDS78512.1	673	18	0.0267459	2	PER1=9aa(296-304),PER2=9aa(480-488)	Family-wise	2308.para.4	MTMR6;MTMR7;MTMR8;MTMR1;MTMR2;MTM1;MTMR9	NO
	MTMR2	ENST00000346299.5	CCDS8305.1	643	18	0.0279938	2	PER1=9aa(267-275),PER2=9aa(451-459)	Family-wise	2308.para.4	MTMR6;MTMR7;MTMR8;MTMR1;MTMR2;MTM1;MTMR9	NO
	MTMR6	ENST00000381801.5	CCDS9313.1	621	18	0.0289855	2	PER1=9aa(186-194),PER2=9aa(370-378)	Family-wise	2308.para.4	MTMR6;MTMR7;MTMR8;MTMR1;MTMR2;MTM1;MTMR9	NO
	MTMR7	ENST00000180173.5	CCDS34851.1	660	18	0.0272727	2	PER1=9aa(188-196),PER2=9aa(372-380)	Family-wise	2308.para.4	MTMR6;MTMR7;MTMR8;MTMR1;MTMR2;MTM1;MTMR9	NO
	MTMR8	ENST00000374852.3	CCDS14379.1	704	18	0.0255682	2	PER1=9aa(188-196),PER2=9aa(372-380)	Family-wise	2308.para.4	MTMR6;MTMR7;MTMR8;MTMR1;MTMR2;MTM1;MTMR9	NO
	MTMR9	ENST00000221086.3	CCDS5979.1	549	18	0.0327869	2	PER1=9aa(185-193),PER2=9aa(367-375)	Family-wise	2308.para.4	MTMR6;MTMR7;MTMR8;MTMR1;MTMR2;MTM1;MTMR9	NO
	MXRA5	ENST00000217939.6	CCDS14124.1	2828	9	0.00318246	1	PER1=9aa(152-160)	Family-wise	2135.para.1	MXRA5;IGSF10	NO
	MYCN	ENST00000281043.3	CCDS1687.1	464	14	0.0301724	1	PER1=14aa(51-64)	Family-wise	3571.para.1	MYC;MYCN	NO
	MYH1	ENST00000226207.5	CCDS11155.1	1939	18	0.00928314	2	PER1=9aa(385-393),PER2=9aa(700-708)	Family-wise	2925.para.1	MYH2;MYH1;MYH4;MYH8;MYH3;MYH13;MYH7;MYH6;MYH7B;MYH15;MYH10;MYH9;MYH11;MYH14	NO
	MYH10	ENST00000360416.3	CCDS58515.1	2007	18	0.00896861	2	PER1=9aa(389-397),PER2=9aa(733-741)	Family-wise	2925.para.1	MYH2;MYH1;MYH4;MYH8;MYH3;MYH13;MYH7;MYH6;MYH7B;MYH15;MYH10;MYH9;MYH11;MYH14	NO
	MYH11	ENST00000396324.3	CCDS45423.1	1979	18	0.0090955	2	PER1=9aa(386-394),PER2=9aa(709-717)	Family-wise	2925.para.1	MYH2;MYH1;MYH4;MYH8;MYH3;MYH13;MYH7;MYH6;MYH7B;MYH15;MYH10;MYH9;MYH11;MYH14	NO
	MYH13	ENST00000418404.3	CCDS45613.1	1938	18	0.00928793	2	PER1=9aa(384-392),PER2=9aa(700-708)	Family-wise	2925.para.1	MYH2;MYH1;MYH4;MYH8;MYH3;MYH13;MYH7;MYH6;MYH7B;MYH15;MYH10;MYH9;MYH11;MYH14	NO
	MYH14	ENST00000601313.1	CCDS54295.1	2036	18	0.00884086	2	PER1=9aa(406-414),PER2=9aa(760-768)	Family-wise	2925.para.1	MYH2;MYH1;MYH4;MYH8;MYH3;MYH13;MYH7;MYH6;MYH7B;MYH15;MYH10;MYH9;MYH11;MYH14	NO
	MYH15	ENST00000273353.3	CCDS43127.1	1946	18	0.00924974	2	PER1=9aa(394-402),PER2=9aa(708-716)	Family-wise	2925.para.1	MYH2;MYH1;MYH4;MYH8;MYH3;MYH13;MYH7;MYH6;MYH7B;MYH15;MYH10;MYH9;MYH11;MYH14	NO
	MYH2	ENST00000245503.5	CCDS11156.1	1941	18	0.00927357	2	PER1=9aa(385-393),PER2=9aa(702-710)	Family-wise	2925.para.1	MYH2;MYH1;MYH4;MYH8;MYH3;MYH13;MYH7;MYH6;MYH7B;MYH15;MYH10;MYH9;MYH11;MYH14	NO
	MYH3	ENST00000583535.1	CCDS11157.1	1940	18	0.00927835	2	PER1=9aa(383-391),PER2=9aa(697-705)	Family-wise	2925.para.1	MYH2;MYH1;MYH4;MYH8;MYH3;MYH13;MYH7;MYH6;MYH7B;MYH15;MYH10;MYH9;MYH11;MYH14	NO
	MYH4	ENST00000255381.2	CCDS11154.1	1939	18	0.00928314	2	PER1=9aa(385-393),PER2=9aa(700-708)	Family-wise	2925.para.1	MYH2;MYH1;MYH4;MYH8;MYH3;MYH13;MYH7;MYH6;MYH7B;MYH15;MYH10;MYH9;MYH11;MYH14	NO
	MYH6	ENST00000405093.3	CCDS9600.1	1939	18	0.00928314	2	PER1=9aa(383-391),PER2=9aa(698-706)	Family-wise	2925.para.1	MYH2;MYH1;MYH4;MYH8;MYH3;MYH13;MYH7;MYH6;MYH7B;MYH15;MYH10;MYH9;MYH11;MYH14	NO
	MYH7	ENST00000355349.3	CCDS9601.1	1935	18	0.00930233	2	PER1=9aa(382-390),PER2=9aa(696-704)	Family-wise	2925.para.1	MYH2;MYH1;MYH4;MYH8;MYH3;MYH13;MYH7;MYH6;MYH7B;MYH15;MYH10;MYH9;MYH11;MYH14	NO
	MYH7B	ENST00000262873.7	CCDS42869.1	1983	18	0.00907716	2	PER1=9aa(427-435),PER2=9aa(745-753)	Family-wise	2925.para.1	MYH2;MYH1;MYH4;MYH8;MYH3;MYH13;MYH7;MYH6;MYH7B;MYH15;MYH10;MYH9;MYH11;MYH14	NO
	MYH8	ENST00000403437.2	CCDS11153.1	1937	18	0.00929272	2	PER1=9aa(385-393),PER2=9aa(699-707)	Family-wise	2925.para.1	MYH2;MYH1;MYH4;MYH8;MYH3;MYH13;MYH7;MYH6;MYH7B;MYH15;MYH10;MYH9;MYH11;MYH14	NO
	MYH9	ENST00000216181.5	CCDS13927.1	1960	18	0.00918367	2	PER1=9aa(372-380),PER2=9aa(695-703)	Family-wise	2925.para.1	MYH2;MYH1;MYH4;MYH8;MYH3;MYH13;MYH7;MYH6;MYH7B;MYH15;MYH10;MYH9;MYH11;MYH14	NO
	MYOC	ENST00000037502.6	CCDS1297.1	504	23	0.0456349	2	PER1=9aa(367-375),PER2=14aa(422-435)	Family-wise	1467.para.1	OLFM4;GLDN;OLFM1;OLFM3;OLFM2;MYOC	NO
	NEFL	#N/A	CCDS75712.1	543	47	0.0865562	3	PER1=24aa(86-109),PER2=14aa(377-390),PER3=9aa(392-400)	Family-wise	116.para.2	VIM;DES;PRPH;GFAP;INA;NEFL	NO
	NEUROD1	ENST00000295108.3	CCDS2283.1	356	14	0.0393258	1	PER1=14aa(105-118)	Family-wise	928.para.1	NEUROD1;NEUROD4;NEUROD6;NEUROD2	NO
	NEUROD4	ENST00000242994.3	CCDS8886.1	331	14	0.0422961	1	PER1=14aa(91-104)	Family-wise	928.para.1	NEUROD1;NEUROD4;NEUROD6;NEUROD2	NO
	NEUROD6	ENST00000297142.3	CCDS5434.1	337	14	0.041543	1	PER1=14aa(98-111)	Family-wise	928.para.1	NEUROD1;NEUROD4;NEUROD6;NEUROD2	NO
	NFASC	ENST00000339876.6	CCDS53460.1	1240	9	0.00725806	1	PER1=9aa(309-317)	Family-wise	155.para.1	NRCAM;NFASC;CHL1;L1CAM;CNTN2;CNTN1;CNTN3;CNTN4;CNTN6;CNTN5	NO
	NFIA	ENST00000371189.4	CCDS53322.1	554	9	0.0162455	1	PER1=9aa(156-164)	Family-wise	232.para.1	NFIX;NFIA;NFIB;NFIC	NO
	NFIB	ENST00000380953.1	CCDS55291.1	494	9	0.0182186	1	PER1=9aa(112-120)	Family-wise	232.para.1	NFIX;NFIA;NFIB;NFIC	NO
	NFIC	ENST00000443272.2	CCDS59330.1	508	9	0.0177165	1	PER1=9aa(112-120)	Family-wise	232.para.1	NFIX;NFIA;NFIB;NFIC	NO
	NFIX	ENST00000397661.2	CCDS45996.1	441	9	0.0204082	1	PER1=9aa(111-119)	Family-wise	232.para.1	NFIX;NFIA;NFIB;NFIC	NO
	NFKB1	ENST00000226574.4	CCDS3657.1	969	14	0.0144479	1	PER1=14aa(918-931)	Family-wise	2228.para.1	NFKB2;NFKB1	NO
	NKX2-3	ENST00000344586.7	CCDS41558.1	364	14	0.0384615	1	PER1=14aa(187-200)	Family-wise	891.para.1	NKX2-5;NKX2-3	NO
	NLRP11	ENST00000443188.1	CCDS12935.1	1033	23	0.0222652	2	PER1=14aa(227-240),PER2=9aa(481-489)	Family-wise	1951.para.1	NLRP9;NLRP4;NLRP14;NLRP12;NLRP3;NLRP13;NLRP5;NLRP2;NLRP7;NLRP8;NLRP11	NO
	NLRP12	ENST00000324134.6	CCDS62785.1	1062	23	0.0216573	2	PER1=14aa(292-305),PER2=9aa(549-557)	Family-wise	1951.para.1	NLRP9;NLRP4;NLRP14;NLRP12;NLRP3;NLRP13;NLRP5;NLRP2;NLRP7;NLRP8;NLRP11	NO
	NLRP13	ENST00000342929.3	CCDS33119.1	1043	23	0.0220518	2	PER1=14aa(309-322),PER2=9aa(574-582)	Family-wise	1951.para.1	NLRP9;NLRP4;NLRP14;NLRP12;NLRP3;NLRP13;NLRP5;NLRP2;NLRP7;NLRP8;NLRP11	NO
	NLRP14	ENST00000299481.4	CCDS7776.1	1093	22	0.0201281	2	PER1=14aa(257-270),PER2=8aa(519-526)	Family-wise	1951.para.1	NLRP9;NLRP4;NLRP14;NLRP12;NLRP3;NLRP13;NLRP5;NLRP2;NLRP7;NLRP8;NLRP11	NO
	NLRP2	ENST00000543010.1	CCDS12913.1	1062	23	0.0216573	2	PER1=14aa(286-299),PER2=9aa(543-551)	Family-wise	1951.para.1	NLRP9;NLRP4;NLRP14;NLRP12;NLRP3;NLRP13;NLRP5;NLRP2;NLRP7;NLRP8;NLRP11	NO
	NLRP4	ENST00000301295.6	CCDS12936.1	994	23	0.0231388	2	PER1=14aa(229-242),PER2=9aa(489-497)	Family-wise	1951.para.1	NLRP9;NLRP4;NLRP14;NLRP12;NLRP3;NLRP13;NLRP5;NLRP2;NLRP7;NLRP8;NLRP11	NO
	NLRP5	ENST00000390649.3	CCDS12938.1	1200	22	0.0183333	2	PER1=14aa(360-373),PER2=8aa(625-632)	Family-wise	1951.para.1	NLRP9;NLRP4;NLRP14;NLRP12;NLRP3;NLRP13;NLRP5;NLRP2;NLRP7;NLRP8;NLRP11	NO
	NLRP7	ENST00000588756.1	CCDS46183.1	1037	23	0.0221794	2	PER1=14aa(251-264),PER2=9aa(508-516)	Family-wise	1951.para.1	NLRP9;NLRP4;NLRP14;NLRP12;NLRP3;NLRP13;NLRP5;NLRP2;NLRP7;NLRP8;NLRP11	NO
	NLRP8	ENST00000291971.3	CCDS12937.1	1048	23	0.0219466	2	PER1=14aa(284-297),PER2=9aa(545-553)	Family-wise	1951.para.1	NLRP9;NLRP4;NLRP14;NLRP12;NLRP3;NLRP13;NLRP5;NLRP2;NLRP7;NLRP8;NLRP11	NO
	NLRP9	ENST00000332836.2	CCDS12934.1	991	23	0.0232089	2	PER1=14aa(226-239),PER2=9aa(481-489)	Family-wise	1951.para.1	NLRP9;NLRP4;NLRP14;NLRP12;NLRP3;NLRP13;NLRP5;NLRP2;NLRP7;NLRP8;NLRP11	NO
	NOD1	ENST00000222823.4	CCDS5427.1	953	9	0.00944386	1	PER1=9aa(395-403)	Family-wise	3216.para.1	NOD1;NOD2	NO
	NOTCH1	ENST00000277541.6	CCDS43905.1	2555	9	0.0035225	1	PER1=9aa(448-456)	Family-wise	997.para.1	NOTCH1;NOTCH2;NOTCH3	NO
	NOTCH2	ENST00000256646.2	CCDS908.1	2471	9	0.00364225	1	PER1=9aa(452-460)	Family-wise	997.para.1	NOTCH1;NOTCH2;NOTCH3	NO
	NOTCH3	ENST00000263388.2	CCDS12326.1	2321	9	0.00387764	1	PER1=9aa(427-435)	Family-wise	997.para.1	NOTCH1;NOTCH2;NOTCH3	NO
	NPAS2	ENST00000335681.5	CCDS2048.1	824	15	0.0182039	1	PER1=15aa(560-574)	Family-wise	1782.para.3	SIM1;SIM2;NPAS3;HIF1A;EPAS1;HIF3A;NPAS2;CLOCK	NO
	NPAS3	ENST00000356141.4	CCDS53891.1	933	18	0.0192926	1	PER1=18aa(652-669)	Family-wise	1782.para.3	SIM1;SIM2;NPAS3;HIF1A;EPAS1;HIF3A;NPAS2;CLOCK	NO
	NR1D1	ENST00000246672.3	CCDS11361.1	614	63	0.102606	3	PER1=14aa(436-449),PER2=19aa(471-489),PER3=30aa(491-520)	Family-wise	2681.para.1	NR1H3;NR1H2;NR1H4;RARB;RARA;RARG;THRB;NR1D2;NR1D1;PPARA;PPARD;PPARG;NR1I2;VDR;RORA	NO
	NR1D2	ENST00000312521.4	CCDS33718.1	579	64	0.110535	4	PER1=14aa(402-415),PER2=19aa(437-455),PER3=30aa(457-486),PER4=1aa(579-579)	Family-wise	2681.para.1	NR1H3;NR1H2;NR1H4;RARB;RARA;RARG;THRB;NR1D2;NR1D1;PPARA;PPARD;PPARG;NR1I2;VDR;RORA	NO
	NR1H2	ENST00000253727.5	CCDS42593.1	460	73	0.158696	4	PER1=14aa(267-280),PER2=19aa(302-320),PER3=31aa(322-352),PER4=9aa(450-458)	Family-wise	2681.para.1	NR1H3;NR1H2;NR1H4;RARB;RARA;RARG;THRB;NR1D2;NR1D1;PPARA;PPARD;PPARG;NR1I2;VDR;RORA	NO
	NR1H3	ENST00000467728.1	CCDS73285.1	453	73	0.161148	4	PER1=14aa(260-273),PER2=19aa(295-313),PER3=31aa(315-345),PER4=9aa(443-451)	Family-wise	2681.para.1	NR1H3;NR1H2;NR1H4;RARB;RARA;RARG;THRB;NR1D2;NR1D1;PPARA;PPARD;PPARG;NR1I2;VDR;RORA	NO
	NR1H4	ENST00000551379.1	CCDS55876.1	486	69	0.141975	4	PER1=14aa(298-311),PER2=19aa(333-351),PER3=27aa(353-379),PER4=9aa(477-485)	Family-wise	2681.para.1	NR1H3;NR1H2;NR1H4;RARB;RARA;RARG;THRB;NR1D2;NR1D1;PPARA;PPARD;PPARG;NR1I2;VDR;RORA	NO
	NR1I2	ENST00000337940.4	CCDS2995.1	473	71	0.150106	4	PER1=14aa(279-292),PER2=19aa(314-332),PER3=29aa(334-362),PER4=9aa(462-470)	Family-wise	2681.para.1	NR1H3;NR1H2;NR1H4;RARB;RARA;RARG;THRB;NR1D2;NR1D1;PPARA;PPARD;PPARG;NR1I2;VDR;RORA	NO
	NR2E1	ENST00000368986.4	CCDS69165.1	422	61	0.14455	4	PER1=19aa(50-68),PER2=19aa(70-88),PER3=14aa(100-113),PER4=9aa(376-384)	Family-wise	1627.para.2	NR2E1;NR2E3;NR2F2;NR2F1;NR2F6;RXRA;RXRG;RXRB	NO
	NR2E3	#N/A	CCDS73750.1	410	60	0.146341	4	PER1=18aa(45-62),PER2=19aa(64-82),PER3=14aa(93-106),PER4=9aa(367-375)	Family-wise	1627.para.2	NR2E1;NR2E3;NR2F2;NR2F1;NR2F6;RXRA;RXRG;RXRB	NO
	NR2F1	#N/A	CCDS4068.1	423	61	0.144208	4	PER1=19aa(83-101),PER2=19aa(103-121),PER3=14aa(131-144),PER4=9aa(366-374)	Family-wise	1627.para.2	NR2E1;NR2E3;NR2F2;NR2F1;NR2F6;RXRA;RXRG;RXRB	NO
	NR2F2	ENST00000394166.3	CCDS10375.1	414	61	0.147343	4	PER1=19aa(76-94),PER2=19aa(96-114),PER3=14aa(124-137),PER4=9aa(359-367)	Family-wise	1627.para.2	NR2E1;NR2E3;NR2F2;NR2F1;NR2F6;RXRA;RXRG;RXRB	NO
	NR2F6	ENST00000291442.3	CCDS12352.1	404	61	0.15099	4	PER1=19aa(53-71),PER2=19aa(73-91),PER3=14aa(101-114),PER4=9aa(349-357)	Family-wise	1627.para.2	NR2E1;NR2E3;NR2F2;NR2F1;NR2F6;RXRA;RXRG;RXRB	NO
	NR3C1	ENST00000231509.3	CCDS34258.1	778	154	0.197943	11	PER1=14aa(419-432),PER2=14aa(434-447),PER3=14aa(459-472),PER4=9aa(474-482),PER5=14aa(540-553),PER6=14aa(560-573),PER7=14aa(580-593),PER8=24aa(595-618),PER9=14aa(620-633),PER10=9aa(725-733),PER11=14aa(749-762)	Family-wise	1023.para.1	NR3C1;NR3C2;PGR;AR;NR4A3;NR4A2;NR4A1	NO
	NR3C2	ENST00000358102.3	CCDS3772.1	984	154	0.156504	11	PER1=14aa(601-614),PER2=14aa(616-629),PER3=14aa(640-653),PER4=9aa(655-663),PER5=14aa(745-758),PER6=14aa(765-778),PER7=14aa(785-798),PER8=24aa(800-823),PER9=14aa(825-838),PER10=9aa(930-938),PER11=14aa(955-968)	Family-wise	1023.para.1	NR3C1;NR3C2;PGR;AR;NR4A3;NR4A2;NR4A1	NO
	NR4A1	ENST00000360284.3	CCDS73471.1	652	146	0.223926	11	PER1=14aa(319-332),PER2=14aa(334-347),PER3=14aa(358-371),PER4=9aa(373-381),PER5=14aa(443-456),PER6=9aa(463-471),PER7=14aa(476-489),PER8=23aa(491-513),PER9=13aa(515-527),PER10=8aa(616-623),PER11=14aa(637-650)	Family-wise	1023.para.1	NR3C1;NR3C2;PGR;AR;NR4A3;NR4A2;NR4A1	NO
	NR4A2	ENST00000339562.4	CCDS2201.1	598	146	0.244147	11	PER1=14aa(261-274),PER2=14aa(276-289),PER3=14aa(300-313),PER4=9aa(315-323),PER5=14aa(389-402),PER6=9aa(409-417),PER7=14aa(422-435),PER8=23aa(437-459),PER9=13aa(461-473),PER10=8aa(562-569),PER11=14aa(583-596)	Family-wise	1023.para.1	NR3C1;NR3C2;PGR;AR;NR4A3;NR4A2;NR4A1	NO
	NR4A3	#N/A	CCDS6742.1	637	146	0.229199	11	PER1=14aa(301-314),PER2=14aa(316-329),PER3=14aa(340-353),PER4=9aa(355-363),PER5=14aa(431-444),PER6=9aa(451-459),PER7=14aa(464-477),PER8=23aa(479-501),PER9=13aa(503-515),PER10=8aa(601-608),PER11=14aa(622-635)	Family-wise	1023.para.1	NR3C1;NR3C2;PGR;AR;NR4A3;NR4A2;NR4A1	NO
	NR5A1	ENST00000373588.4	CCDS6856.1	461	19	0.0412148	1	PER1=19aa(23-41)	Family-wise	3171.para.1	NR5A1;NR5A2;NR6A1	NO
	NR5A2	ENST00000367362.3	CCDS1401.1	541	19	0.0351201	1	PER1=19aa(96-114)	Family-wise	3171.para.1	NR5A1;NR5A2;NR6A1	NO
	NR6A1	ENST00000487099.2	CCDS35137.1	480	19	0.0395833	1	PER1=19aa(70-88)	Family-wise	3171.para.1	NR5A1;NR5A2;NR6A1	NO
	NRAS	ENST00000369535.4	CCDS877.1	189	33	0.174603	2	PER1=19aa(8-26),PER2=14aa(53-66)	Family-wise	3537.para.2	RRAS2;RRAS;MRAS;NRAS;KRAS;HRAS;RALB;RALA;ERAS	NO
	NRCAM	ENST00000379028.3	CCDS47686.1	1304	9	0.00690184	1	PER1=9aa(333-341)	Family-wise	155.para.1	NRCAM;NFASC;CHL1;L1CAM;CNTN2;CNTN1;CNTN3;CNTN4;CNTN6;CNTN5	NO
	OCRL	ENST00000371113.4	CCDS35393.1	901	18	0.0199778	2	PER1=9aa(271-279),PER2=9aa(496-504)	Family-wise	733.para.1	OCRL;INPP5B	NO
	OLFM1	ENST00000252854.4	CCDS65184.1	485	23	0.0474227	2	PER1=9aa(343-351),PER2=14aa(398-411)	Family-wise	1467.para.1	OLFM4;GLDN;OLFM1;OLFM3;OLFM2;MYOC	NO
	OLFM2	ENST00000264833.4	CCDS12221.1	454	23	0.0506608	2	PER1=9aa(311-319),PER2=14aa(366-379)	Family-wise	1467.para.1	OLFM4;GLDN;OLFM1;OLFM3;OLFM2;MYOC	NO
	OLFM3	ENST00000370103.4	CCDS72832.1	478	23	0.0481172	2	PER1=9aa(335-343),PER2=14aa(390-403)	Family-wise	1467.para.1	OLFM4;GLDN;OLFM1;OLFM3;OLFM2;MYOC	NO
	OLFM4	ENST00000219022.2	CCDS9440.1	510	23	0.045098	2	PER1=9aa(371-379),PER2=14aa(426-439)	Family-wise	1467.para.1	OLFM4;GLDN;OLFM1;OLFM3;OLFM2;MYOC	NO
	OPHN1	ENST00000355520.5	CCDS14388.1	802	9	0.0112219	1	PER1=9aa(407-415)	Family-wise	34.para.1	ARHGAP10;ARHGAP26;OPHN1	NO
	OPN1LW	ENST00000369951.4	CCDS14742.1	364	28	0.0769231	2	PER1=19aa(189-207),PER2=9aa(224-232)	Family-wise	3461.para.1	OPN1SW;RHO;OPN1LW;OPN1MW;OPN1MW2;OPN3;RRH;OPN4;OPN5	NO
	OPN1MW	ENST00000369935.5	CCDS14743.1	364	28	0.0769231	2	PER1=19aa(189-207),PER2=9aa(224-232)	Family-wise	3461.para.1	OPN1SW;RHO;OPN1LW;OPN1MW;OPN1MW2;OPN3;RRH;OPN4;OPN5	NO
	OPN1MW2	ENST00000369929.4	CCDS35447.1	364	28	0.0769231	2	PER1=19aa(189-207),PER2=9aa(224-232)	Family-wise	3461.para.1	OPN1SW;RHO;OPN1LW;OPN1MW;OPN1MW2;OPN3;RRH;OPN4;OPN5	NO
	OPN1SW	ENST00000249389.2	CCDS5806.1	348	28	0.0804598	2	PER1=19aa(170-188),PER2=9aa(205-213)	Family-wise	3461.para.1	OPN1SW;RHO;OPN1LW;OPN1MW;OPN1MW2;OPN3;RRH;OPN4;OPN5	NO
	OPN3	ENST00000366554.2	CCDS31072.1	402	28	0.0696517	2	PER1=19aa(174-192),PER2=9aa(207-215)	Family-wise	3461.para.1	OPN1SW;RHO;OPN1LW;OPN1MW;OPN1MW2;OPN3;RRH;OPN4;OPN5	NO
	OPN4	ENST00000372071.2	CCDS31237.1	489	28	0.0572597	2	PER1=19aa(218-236),PER2=9aa(251-259)	Family-wise	3461.para.1	OPN1SW;RHO;OPN1LW;OPN1MW;OPN1MW2;OPN3;RRH;OPN4;OPN5	NO
	OPN5	ENST00000371211.2	CCDS4923.1	354	28	0.079096	2	PER1=19aa(169-187),PER2=9aa(204-212)	Family-wise	3461.para.1	OPN1SW;RHO;OPN1LW;OPN1MW;OPN1MW2;OPN3;RRH;OPN4;OPN5	NO
	OTP	ENST00000306422.3	CCDS4039.1	325	14	0.0430769	1	PER1=14aa(147-160)	Family-wise	92.para.2	ALX3;ALX1;RAX;SHOX2;OTP	NO
	OTX1	ENST00000282549.2	CCDS1873.1	354	24	0.0677966	1	PER1=24aa(74-97)	Family-wise	719.para.2	OTX1;OTX2;CRX;DMBX1	NO
	OTX2	ENST00000339475.5	CCDS9728.1	297	24	0.0808081	1	PER1=24aa(82-105)	Family-wise	719.para.2	OTX1;OTX2;CRX;DMBX1	NO
	P4HB	ENST00000331483.4	CCDS11787.1	508	9	0.0177165	1	PER1=9aa(392-400)	Family-wise	1710.para.1	PDIA2;P4HB;PDIA3;PDILT	NO
	PACS1	ENST00000320580.4	CCDS8129.1	963	9	0.00934579	1	PER1=9aa(286-294)	Family-wise	3118.para.1	PACS1;PACS2	NO
	PAFAH1B1	ENST00000397195.5	CCDS32528.1	410	7	0.0170732	1	PER1=7aa(165-171)	Family-wise	359.para.1	WDR5B;WDR5;PAFAH1B1;DAW1;SNRNP40;POC1A;POC1B;PRPF4;WDR38;WDR61;SMU1	NO
	PAX2	ENST00000428433.1	CCDS7499.1	396	53	0.133838	2	PER1=44aa(16-59),PER2=9aa(62-70)	Family-wise	1391.para.1	PAX2;PAX5;PAX8;PAX9;PAX6;PAX4	NO
	PAX4	ENST00000341640.2	CCDS5797.1	343	49	0.142857	2	PER1=40aa(1-40),PER2=9aa(43-51)	Family-wise	1391.para.1	PAX2;PAX5;PAX8;PAX9;PAX6;PAX4	NO
	PAX5	ENST00000358127.4	CCDS6607.1	391	53	0.13555	2	PER1=44aa(16-59),PER2=9aa(62-70)	Family-wise	1391.para.1	PAX2;PAX5;PAX8;PAX9;PAX6;PAX4	NO
	PAX7	ENST00000375375.3	CCDS186.1	520	32	0.0615385	3	PER1=9aa(56-64),PER2=14aa(76-89),PER3=9aa(262-270)	Family-wise	1391.para.2	PAX3;PAX7	NO
	PCDH1	ENST00000287008.3	CCDS4267.1	1237	32	0.025869	3	PER1=9aa(159-167),PER2=14aa(269-282),PER3=9aa(497-505)	Family-wise	3544.para.2	PCDH19;PCDH17;PCDH10;PCDH18;PCDH8;PCDH11Y;PCDH11X;PCDH9;PCDH1	NO
	PCDH10	ENST00000264360.5	CCDS34063.1	1040	32	0.0307692	3	PER1=9aa(113-121),PER2=14aa(239-252),PER3=9aa(454-462)	Family-wise	3544.para.2	PCDH19;PCDH17;PCDH10;PCDH18;PCDH8;PCDH11Y;PCDH11X;PCDH9;PCDH1	NO
	PCDH11X	ENST00000373094.1	CCDS14461.1	1347	32	0.0237565	3	PER1=9aa(130-138),PER2=14aa(238-251),PER3=9aa(457-465)	Family-wise	3544.para.2	PCDH19;PCDH17;PCDH10;PCDH18;PCDH8;PCDH11Y;PCDH11X;PCDH9;PCDH1	NO
	PCDH11Y	ENST00000362095.5	CCDS76066.1	1340	32	0.0238806	3	PER1=9aa(162-170),PER2=14aa(270-283),PER3=9aa(489-497)	Family-wise	3544.para.2	PCDH19;PCDH17;PCDH10;PCDH18;PCDH8;PCDH11Y;PCDH11X;PCDH9;PCDH1	NO
	PCDH17	ENST00000377918.3	CCDS31986.1	1159	32	0.02761	3	PER1=9aa(123-131),PER2=14aa(232-245),PER3=9aa(463-471)	Family-wise	3544.para.2	PCDH19;PCDH17;PCDH10;PCDH18;PCDH8;PCDH11Y;PCDH11X;PCDH9;PCDH1	NO
	PCDH18	ENST00000344876.4	CCDS34064.1	1135	32	0.0281938	3	PER1=9aa(128-136),PER2=14aa(235-248),PER3=9aa(456-464)	Family-wise	3544.para.2	PCDH19;PCDH17;PCDH10;PCDH18;PCDH8;PCDH11Y;PCDH11X;PCDH9;PCDH1	NO
	PCDH19	ENST00000373034.4	CCDS55462.1	1148	32	0.0278746	3	PER1=9aa(120-128),PER2=14aa(227-240),PER3=9aa(444-452)	Family-wise	3544.para.2	PCDH19;PCDH17;PCDH10;PCDH18;PCDH8;PCDH11Y;PCDH11X;PCDH9;PCDH1	NO
	PCDH8	#N/A	CCDS9438.1	1070	32	0.0299065	3	PER1=9aa(126-134),PER2=14aa(234-247),PER3=9aa(488-496)	Family-wise	3544.para.2	PCDH19;PCDH17;PCDH10;PCDH18;PCDH8;PCDH11Y;PCDH11X;PCDH9;PCDH1	NO
	PCDH9	ENST00000544246.1	CCDS9444.1	1237	32	0.025869	3	PER1=9aa(133-141),PER2=14aa(241-254),PER3=9aa(460-468)	Family-wise	3544.para.2	PCDH19;PCDH17;PCDH10;PCDH18;PCDH8;PCDH11Y;PCDH11X;PCDH9;PCDH1	NO
	PDE3B	ENST00000282096.4	CCDS7817.1	1112	7	0.00629496	1	PER1=7aa(445-451)	Family-wise	2861.para.1	PDE3B;PDE3A	NO
	PDE4A	ENST00000352831.6	CCDS45961.1	886	42	0.0474041	3	PER1=14aa(176-189),PER2=14aa(250-263),PER3=14aa(280-293)	Family-wise	1499.para.2	PDE4B;PDE4D;PDE4A;PDE4C	NO
	PDE4B	ENST00000329654.4	CCDS632.1	736	42	0.0570652	3	PER1=14aa(164-177),PER2=14aa(238-251),PER3=14aa(268-281)	Family-wise	1499.para.2	PDE4B;PDE4D;PDE4A;PDE4C	NO
	PDE4C	ENST00000355502.3	CCDS12373.1	712	42	0.0589888	3	PER1=14aa(150-163),PER2=14aa(225-238),PER3=14aa(255-268)	Family-wise	1499.para.2	PDE4B;PDE4D;PDE4A;PDE4C	NO
	PDGFRB	ENST00000261799.4	CCDS4303.1	1106	112	0.101266	8	PER1=14aa(560-573),PER2=14aa(645-658),PER3=14aa(660-673),PER4=9aa(675-683),PER5=19aa(817-835),PER6=24aa(837-860),PER7=9aa(867-875),PER8=9aa(897-905)	Family-wise	683.para.3	CSF1R;KIT;PDGFRA;PDGFRB;FLT3	NO
	PDIA2	ENST00000219406.6	CCDS42089.1	525	9	0.0171429	1	PER1=9aa(413-421)	Family-wise	1710.para.1	PDIA2;P4HB;PDIA3;PDILT	NO
	PDIA3	ENST00000300289.5	CCDS10101.1	505	9	0.0178218	1	PER1=9aa(401-409)	Family-wise	1710.para.1	PDIA2;P4HB;PDIA3;PDILT	NO
	PDILT	ENST00000302451.4	CCDS10584.1	584	9	0.015411	1	PER1=9aa(412-420)	Family-wise	1710.para.1	PDIA2;P4HB;PDIA3;PDILT	NO
	PDZD7	ENST00000370215.3	CCDS73182.1	1033	9	0.00871249	1	PER1=9aa(102-110)	Family-wise	1633.para.1	USH1C;PDZD7	NO
	PENK	ENST00000314922.3	CCDS6168.1	267	9	0.0337079	1	PER1=9aa(214-222)	Family-wise	508.para.1	PENK;PDYN	NO
	PGR	ENST00000325455.5	CCDS8310.1	933	154	0.165059	11	PER1=14aa(565-578),PER2=14aa(580-593),PER3=14aa(604-617),PER4=9aa(619-627),PER5=14aa(694-707),PER6=14aa(714-727),PER7=14aa(734-747),PER8=24aa(749-772),PER9=14aa(774-787),PER10=9aa(879-887),PER11=14aa(904-917)	Family-wise	1023.para.1	NR3C1;NR3C2;PGR;AR;NR4A3;NR4A2;NR4A1	NO
	PHEX	ENST00000379374.4	CCDS14204.1	749	9	0.012016	1	PER1=9aa(645-653)	Family-wise	2595.para.1	MMEL1;MME;ECE1;ECE2;PHEX;ECEL1;KEL	NO
	PHKA1	ENST00000373542.4	CCDS14421.1	1223	14	0.0114473	1	PER1=14aa(126-139)	Family-wise	3514.para.1	PHKA1;PHKA2;PHKB	NO
	PHKB	ENST00000323584.5	CCDS10729.1	1093	14	0.0128088	1	PER1=14aa(163-176)	Family-wise	3514.para.1	PHKA1;PHKA2;PHKB	NO
	PHOX2A	ENST00000298231.5	CCDS8214.1	284	9	0.0316901	1	PER1=9aa(132-140)	Family-wise	92.para.3	PHOX2A;PHOX2B	NO
	PHOX2B	ENST00000226382.2	CCDS3463.1	314	9	0.0286624	1	PER1=9aa(140-148)	Family-wise	92.para.3	PHOX2A;PHOX2B	NO
	PIK3CA	ENST00000263967.3	CCDS43171.1	1068	28	0.0262172	2	PER1=14aa(539-552),PER2=14aa(1040-1053)	Family-wise	2130.para.2	PIK3CB;PIK3CD;PIK3CA;PIK3CG	NO
	PIK3CB	ENST00000477593.1	CCDS3104.1	1070	28	0.0261682	2	PER1=14aa(546-559),PER2=14aa(1042-1055)	Family-wise	2130.para.2	PIK3CB;PIK3CD;PIK3CA;PIK3CG	NO
	PIK3CD	ENST00000377346.4	CCDS104.1	1044	28	0.0268199	2	PER1=14aa(519-532),PER2=14aa(1016-1029)	Family-wise	2130.para.2	PIK3CB;PIK3CD;PIK3CA;PIK3CG	NO
	PIK3CG	ENST00000359195.3	CCDS5739.1	1102	28	0.0254083	2	PER1=14aa(563-576),PER2=14aa(1069-1082)	Family-wise	2130.para.2	PIK3CB;PIK3CD;PIK3CA;PIK3CG	NO
	PIK3R1	ENST00000521381.1	CCDS3993.1	724	23	0.031768	2	PER1=9aa(369-377),PER2=14aa(559-572)	Family-wise	2311.para.1	PIK3R1;PIK3R2	NO
	PIK3R2	ENST00000222254.8	CCDS12371.1	728	23	0.0315934	2	PER1=9aa(366-374),PER2=14aa(556-569)	Family-wise	2311.para.1	PIK3R1;PIK3R2	NO
	PKNOX1	ENST00000291547.5	CCDS13692.1	436	14	0.0321101	1	PER1=14aa(307-320)	Family-wise	473.para.1	PKNOX2;PKNOX1;MEIS1;MEIS2;MEIS3	NO
	PKNOX2	ENST00000298282.9	CCDS41730.1	472	14	0.029661	1	PER1=14aa(336-349)	Family-wise	473.para.1	PKNOX2;PKNOX1;MEIS1;MEIS2;MEIS3	NO
	PKP1	ENST00000263946.3	CCDS30966.1	747	9	0.0120482	1	PER1=9aa(479-487)	Family-wise	3192.para.2	PKP2;PKP1;PKP3	NO
	PKP2	ENST00000070846.6	CCDS8731.1	881	9	0.0102157	1	PER1=9aa(611-619)	Family-wise	3192.para.2	PKP2;PKP1;PKP3	NO
	PKP3	ENST00000331563.2	CCDS7695.1	797	9	0.0112923	1	PER1=9aa(531-539)	Family-wise	3192.para.2	PKP2;PKP1;PKP3	NO
	PLA1A	ENST00000273371.4	CCDS2991.1	456	14	0.0307018	1	PER1=14aa(186-199)	Family-wise	1926.para.1	LPL;LIPG;LIPC;PNLIPRP1;PNLIP;PNLIPRP3;LIPI;LIPH;PLA1A	NO
	PNLIP	ENST00000369221.2	CCDS7594.1	465	14	0.0301075	1	PER1=14aa(189-202)	Family-wise	1926.para.1	LPL;LIPG;LIPC;PNLIPRP1;PNLIP;PNLIPRP3;LIPI;LIPH;PLA1A	NO
	PNLIPRP1	ENST00000528052.1	CCDS7595.1	467	14	0.0299786	1	PER1=14aa(190-203)	Family-wise	1926.para.1	LPL;LIPG;LIPC;PNLIPRP1;PNLIP;PNLIPRP3;LIPI;LIPH;PLA1A	NO
	PNLIPRP3	ENST00000369230.3	CCDS31292.1	467	14	0.0299786	1	PER1=14aa(187-200)	Family-wise	1926.para.1	LPL;LIPG;LIPC;PNLIPRP1;PNLIP;PNLIPRP3;LIPI;LIPH;PLA1A	NO
	POC1A	ENST00000296484.2	CCDS2846.1	407	7	0.017199	1	PER1=7aa(118-124)	Family-wise	359.para.1	WDR5B;WDR5;PAFAH1B1;DAW1;SNRNP40;POC1A;POC1B;PRPF4;WDR38;WDR61;SMU1	NO
	POC1B	ENST00000313546.3	CCDS31869.1	478	7	0.0146444	1	PER1=7aa(117-123)	Family-wise	359.para.1	WDR5B;WDR5;PAFAH1B1;DAW1;SNRNP40;POC1A;POC1B;PRPF4;WDR38;WDR61;SMU1	NO
	POLH	ENST00000372236.4	CCDS4902.1	713	9	0.0126227	1	PER1=9aa(258-266)	Family-wise	1537.para.1	POLI;POLH	NO
	POLI	ENST00000579534.1	CCDS11954.2	740	8	0.0108108	1	PER1=8aa(267-274)	Family-wise	1537.para.1	POLI;POLH	NO
	POSTN	ENST00000379747.4	CCDS9364.1	836	32	0.0382775	3	PER1=9aa(509-517),PER2=9aa(534-542),PER3=14aa(614-627)	Family-wise	434.para.1	POSTN;TGFBI	NO
	POU1F1	ENST00000344265.3	CCDS46873.1	317	18	0.0567823	2	PER1=9aa(189-197),PER2=9aa(287-295)	Family-wise	644.para.2	POU1F1;POU3F4	NO
	POU3F4	ENST00000373200.2	CCDS14450.1	361	18	0.0498615	2	PER1=9aa(225-233),PER2=9aa(325-333)	Family-wise	644.para.2	POU1F1;POU3F4	NO
	PPARA	ENST00000396000.2	CCDS33669.1	468	73	0.155983	4	PER1=14aa(273-286),PER2=19aa(308-326),PER3=31aa(328-358),PER4=9aa(458-466)	Family-wise	2681.para.1	NR1H3;NR1H2;NR1H4;RARB;RARA;RARG;THRB;NR1D2;NR1D1;PPARA;PPARD;PPARG;NR1I2;VDR;RORA	NO
	PPARD	ENST00000311565.4	CCDS4803.1	441	73	0.165533	4	PER1=14aa(246-259),PER2=19aa(281-299),PER3=31aa(301-331),PER4=9aa(431-439)	Family-wise	2681.para.1	NR1H3;NR1H2;NR1H4;RARB;RARA;RARG;THRB;NR1D2;NR1D1;PPARA;PPARD;PPARG;NR1I2;VDR;RORA	NO
	PPARG	ENST00000287820.6	CCDS2609.1	505	73	0.144554	4	PER1=14aa(310-323),PER2=19aa(345-363),PER3=31aa(365-395),PER4=9aa(495-503)	Family-wise	2681.para.1	NR1H3;NR1H2;NR1H4;RARB;RARA;RARG;THRB;NR1D2;NR1D1;PPARA;PPARD;PPARG;NR1I2;VDR;RORA	NO
	PPP2R1B	ENST00000311129.5	CCDS8348.1	667	9	0.0134933	1	PER1=9aa(191-199)	Family-wise	877.para.1	PPP2R1A;PPP2R1B	NO
	PPP2R5A	ENST00000261461.2	CCDS1503.1	486	14	0.0288066	1	PER1=14aa(142-155)	Family-wise	2075.para.1	PPP2R5E;PPP2R5A;PPP2R5B;PPP2R5C;PPP2R5D	NO
	PPP2R5B	ENST00000164133.2	CCDS8085.1	497	14	0.028169	1	PER1=14aa(148-161)	Family-wise	2075.para.1	PPP2R5E;PPP2R5A;PPP2R5B;PPP2R5C;PPP2R5D	NO
	PPP2R5C	ENST00000422945.2	CCDS53912.1	555	14	0.0252252	1	PER1=14aa(148-161)	Family-wise	2075.para.1	PPP2R5E;PPP2R5A;PPP2R5B;PPP2R5C;PPP2R5D	NO
	PPP2R5E	ENST00000337537.3	CCDS9758.1	467	14	0.0299786	1	PER1=14aa(134-147)	Family-wise	2075.para.1	PPP2R5E;PPP2R5A;PPP2R5B;PPP2R5C;PPP2R5D	NO
	PROC	ENST00000234071.3	CCDS2145.1	461	9	0.0195228	1	PER1=9aa(382-390)	Family-wise	2553.para.2	F10;F9;F7;PROC;PROZ	NO
	PROZ	ENST00000342783.4	CCDS58300.1	422	9	0.021327	1	PER1=9aa(358-366)	Family-wise	2553.para.2	F10;F9;F7;PROC;PROZ	NO
	PRPF4	ENST00000374198.4	CCDS6791.1	522	9	0.0172414	1	PER1=9aa(294-302)	Family-wise	359.para.1	WDR5B;WDR5;PAFAH1B1;DAW1;SNRNP40;POC1A;POC1B;PRPF4;WDR38;WDR61;SMU1	NO
	PRPH	ENST00000257860.4	CCDS8783.1	470	47	0.1	3	PER1=24aa(93-116),PER2=14aa(384-397),PER3=9aa(399-407)	Family-wise	116.para.2	VIM;DES;PRPH;GFAP;INA;NEFL	NO
	PRPH2	ENST00000230381.5	CCDS4871.1	346	9	0.0260116	1	PER1=9aa(208-216)	Family-wise	351.para.1	PRPH2;ROM1	NO
	PTDSS2	ENST00000308020.5	CCDS7696.1	487	9	0.0184805	1	PER1=9aa(286-294)	Family-wise	209.para.1	PTDSS2;PTDSS1	NO
	PTK2	ENST00000340930.3	CCDS56557.1	1065	14	0.0131455	1	PER1=14aa(480-493)	Family-wise	682.para.2	JAK1;TYK2;JAK3;JAK2;PTK2B;PTK2	NO
	PTK2B	ENST00000397501.1	CCDS6057.1	1009	14	0.0138751	1	PER1=14aa(483-496)	Family-wise	682.para.2	JAK1;TYK2;JAK3;JAK2;PTK2B;PTK2	NO
	PTPN11	ENST00000351677.2	CCDS9163.1	593	9	0.0151771	1	PER1=9aa(56-64)	Family-wise	2144.para.4	PTPN11;PTPN6	NO
	PTPN3	ENST00000374541.2	CCDS6776.1	913	23	0.0251917	2	PER1=9aa(255-263),PER2=14aa(293-306)	Family-wise	687.para.2	EPB41L4B;EPB41L5;EPB41L4A;EPB41L3;EPB41;EPB41L2;EPB41L1;FARP2;FARP1;FRMD7;PTPN4;PTPN3	NO
	PTPN4	ENST00000263708.2	CCDS2129.1	926	23	0.024838	2	PER1=9aa(255-263),PER2=14aa(293-306)	Family-wise	687.para.2	EPB41L4B;EPB41L5;EPB41L4A;EPB41L3;EPB41;EPB41L2;EPB41L1;FARP2;FARP1;FRMD7;PTPN4;PTPN3	NO
	PTPN6	ENST00000456013.1	CCDS44821.1	624	9	0.0144231	1	PER1=9aa(54-62)	Family-wise	2144.para.4	PTPN11;PTPN6	NO
	RAB18	ENST00000356940.6	CCDS73081.1	235	9	0.0382979	1	PER1=9aa(18-26)	Family-wise	3033.para.1	RAB33B;RAB33A;RAB35;RAB18	NO
	RAB33A	ENST00000257017.4	CCDS14621.1	237	9	0.0379747	1	PER1=9aa(46-54)	Family-wise	3033.para.1	RAB33B;RAB33A;RAB35;RAB18	NO
	RAB33B	ENST00000305626.5	CCDS3747.1	229	9	0.0393013	1	PER1=9aa(43-51)	Family-wise	3033.para.1	RAB33B;RAB33A;RAB35;RAB18	NO
	RAB35	ENST00000229340.5	CCDS41846.1	201	9	0.0447761	1	PER1=9aa(18-26)	Family-wise	3033.para.1	RAB33B;RAB33A;RAB35;RAB18	NO
	RAC1	ENST00000356142.4	CCDS5349.1	211	14	0.0663507	1	PER1=14aa(55-68)	Family-wise	2241.para.1	RHOU;RHOV;RAC3;RAC1;RAC2;RHOG;CDC42;RHOJ;RHOQ;RHOH	NO
	RAC2	ENST00000249071.6	CCDS13945.1	192	14	0.0729167	1	PER1=14aa(55-68)	Family-wise	2241.para.1	RHOU;RHOV;RAC3;RAC1;RAC2;RHOG;CDC42;RHOJ;RHOQ;RHOH	NO
	RAI1	ENST00000353383.1	CCDS11188.1	1906	9	0.00472193	1	PER1=9aa(1688-1696)	Family-wise	3124.para.1	TCF20;RAI1	NO
	RALA	ENST00000005257.2	CCDS5460.1	206	33	0.160194	2	PER1=19aa(19-37),PER2=14aa(64-77)	Family-wise	3537.para.2	RRAS2;RRAS;MRAS;NRAS;KRAS;HRAS;RALB;RALA;ERAS	NO
	RALB	ENST00000272519.5	CCDS2131.1	206	33	0.160194	2	PER1=19aa(19-37),PER2=14aa(64-77)	Family-wise	3537.para.2	RRAS2;RRAS;MRAS;NRAS;KRAS;HRAS;RALB;RALA;ERAS	NO
	RARA	ENST00000254066.5	CCDS11366.1	462	72	0.155844	4	PER1=14aa(225-238),PER2=19aa(260-278),PER3=30aa(280-309),PER4=9aa(408-416)	Family-wise	2681.para.1	NR1H3;NR1H2;NR1H4;RARB;RARA;RARG;THRB;NR1D2;NR1D1;PPARA;PPARD;PPARG;NR1I2;VDR;RORA	NO
	RARB	ENST00000330688.4	CCDS2642.1	448	72	0.160714	4	PER1=14aa(218-231),PER2=19aa(253-271),PER3=30aa(273-302),PER4=9aa(401-409)	Family-wise	2681.para.1	NR1H3;NR1H2;NR1H4;RARB;RARA;RARG;THRB;NR1D2;NR1D1;PPARA;PPARD;PPARG;NR1I2;VDR;RORA	NO
	RARG	ENST00000425354.2	CCDS8850.1	454	72	0.15859	4	PER1=14aa(227-240),PER2=19aa(262-280),PER3=30aa(282-311),PER4=9aa(410-418)	Family-wise	2681.para.1	NR1H3;NR1H2;NR1H4;RARB;RARA;RARG;THRB;NR1D2;NR1D1;PPARA;PPARD;PPARG;NR1I2;VDR;RORA	NO
	RASL11A	ENST00000241463.4	CCDS9321.1	242	9	0.0371901	1	PER1=9aa(55-63)	Family-wise	2034.para.1	RASL11B;RASL11A;RERG;RASL12;RHEBL1;RHEB;RERGL	NO
	RASL11B	ENST00000248706.3	CCDS3490.1	248	9	0.0362903	1	PER1=9aa(61-69)	Family-wise	2034.para.1	RASL11B;RASL11A;RERG;RASL12;RHEBL1;RHEB;RERGL	NO
	RASL12	ENST00000220062.4	CCDS10200.1	266	9	0.0338346	1	PER1=9aa(48-56)	Family-wise	2034.para.1	RASL11B;RASL11A;RERG;RASL12;RHEBL1;RHEB;RERGL	NO
	RBPJL	ENST00000343694.3	CCDS13349.1	517	9	0.0174081	1	PER1=9aa(81-89)	Family-wise	582.para.1	RBPJ;RBPJL	NO
	RDH11	ENST00000381346.4	CCDS32104.1	318	9	0.0283019	1	PER1=9aa(202-210)	Family-wise	567.para.1	RDH11;RDH12;RDH13;RDH14;DHRS13;DHRS12	NO
	RDH12	ENST00000551171.1	CCDS9787.1	316	9	0.028481	1	PER1=9aa(200-208)	Family-wise	567.para.1	RDH11;RDH12;RDH13;RDH14;DHRS13;DHRS12	NO
	RDH13	ENST00000415061.3	CCDS54320.1	331	9	0.0271903	1	PER1=9aa(200-208)	Family-wise	567.para.1	RDH11;RDH12;RDH13;RDH14;DHRS13;DHRS12	NO
	RDH14	ENST00000381249.3	CCDS1693.1	336	9	0.0267857	1	PER1=9aa(217-225)	Family-wise	567.para.1	RDH11;RDH12;RDH13;RDH14;DHRS13;DHRS12	NO
	RDH16	ENST00000398138.3	CCDS41797.1	317	9	0.0283912	1	PER1=9aa(174-182)	Family-wise	1183.para.1	HSD11B2;HSD17B2;RDH16;HSD17B6;RDH5;SDR9C7;DHRS9;BDH1;HSD17B1;RDH8;DHRS7C;DHRS7B;DHRS7;KDSR	NO
	RDH5	ENST00000257895.5	CCDS31829.1	318	9	0.0283019	1	PER1=9aa(173-181)	Family-wise	1183.para.1	HSD11B2;HSD17B2;RDH16;HSD17B6;RDH5;SDR9C7;DHRS9;BDH1;HSD17B1;RDH8;DHRS7C;DHRS7B;DHRS7;KDSR	NO
	RDH8	ENST00000591589.1	CCDS12223.2	331	9	0.0271903	1	PER1=9aa(173-181)	Family-wise	1183.para.1	HSD11B2;HSD17B2;RDH16;HSD17B6;RDH5;SDR9C7;DHRS9;BDH1;HSD17B1;RDH8;DHRS7C;DHRS7B;DHRS7;KDSR	NO
	REEP2	ENST00000254901.5	CCDS64259.1	254	9	0.0354331	1	PER1=9aa(36-44)	Family-wise	2153.para.1	REEP4;REEP3;REEP2	NO
	REEP3	ENST00000373758.4	CCDS44411.1	255	9	0.0352941	1	PER1=9aa(36-44)	Family-wise	2153.para.1	REEP4;REEP3;REEP2	NO
	REEP4	ENST00000306306.3	CCDS6024.1	257	9	0.0350195	1	PER1=9aa(36-44)	Family-wise	2153.para.1	REEP4;REEP3;REEP2	NO
	RERG	ENST00000256953.2	CCDS8673.1	199	9	0.0452261	1	PER1=9aa(34-42)	Family-wise	2034.para.1	RASL11B;RASL11A;RERG;RASL12;RHEBL1;RHEB;RERGL	NO
	RERGL	ENST00000229002.2	CCDS8679.1	205	9	0.0439024	1	PER1=9aa(32-40)	Family-wise	2034.para.1	RASL11B;RASL11A;RERG;RASL12;RHEBL1;RHEB;RERGL	NO
	RHBDF1	ENST00000262316.6	CCDS32344.1	855	14	0.0163743	1	PER1=14aa(151-164)	Family-wise	1431.para.1	RHBDF1;RHBDF2	NO
	RHEB	ENST00000262187.5	CCDS5927.1	184	9	0.048913	1	PER1=9aa(34-42)	Family-wise	2034.para.1	RASL11B;RASL11A;RERG;RASL12;RHEBL1;RHEB;RERGL	NO
	RHEBL1	ENST00000301068.6	CCDS8778.1	183	9	0.0491803	1	PER1=9aa(34-42)	Family-wise	2034.para.1	RASL11B;RASL11A;RERG;RASL12;RHEBL1;RHEB;RERGL	NO
	RHO	ENST00000296271.3	CCDS3063.1	348	28	0.0804598	2	PER1=19aa(173-191),PER2=9aa(208-216)	Family-wise	3461.para.1	OPN1SW;RHO;OPN1LW;OPN1MW;OPN1MW2;OPN3;RRH;OPN4;OPN5	NO
	RHOG	ENST00000351018.4	CCDS7748.1	191	14	0.0732984	1	PER1=14aa(55-68)	Family-wise	2241.para.1	RHOU;RHOV;RAC3;RAC1;RAC2;RHOG;CDC42;RHOJ;RHOQ;RHOH	NO
	RHOH	ENST00000381799.5	CCDS3458.1	191	14	0.0732984	1	PER1=14aa(56-69)	Family-wise	2241.para.1	RHOU;RHOV;RAC3;RAC1;RAC2;RHOG;CDC42;RHOJ;RHOQ;RHOH	NO
	RHOJ	ENST00000316754.3	CCDS9757.1	214	14	0.0654206	1	PER1=14aa(73-86)	Family-wise	2241.para.1	RHOU;RHOV;RAC3;RAC1;RAC2;RHOG;CDC42;RHOJ;RHOQ;RHOH	NO
	RHOQ	ENST00000238738.4	CCDS33191.1	205	14	0.0682927	1	PER1=14aa(61-74)	Family-wise	2241.para.1	RHOU;RHOV;RAC3;RAC1;RAC2;RHOG;CDC42;RHOJ;RHOQ;RHOH	NO
	RHOU	ENST00000366691.3	CCDS1575.1	258	14	0.0542636	1	PER1=14aa(101-114)	Family-wise	2241.para.1	RHOU;RHOV;RAC3;RAC1;RAC2;RHOG;CDC42;RHOJ;RHOQ;RHOH	NO
	RHOV	ENST00000220507.4	CCDS10068.1	236	14	0.059322	1	PER1=14aa(83-96)	Family-wise	2241.para.1	RHOU;RHOV;RAC3;RAC1;RAC2;RHOG;CDC42;RHOJ;RHOQ;RHOH	NO
	RIPK4	ENST00000332512.3	CCDS13675.1	784	9	0.0114796	1	PER1=9aa(182-190)	Family-wise	2703.para.2	ANKK1;RIPK4	NO
	RNF128	ENST00000255499.2	CCDS14521.1	428	9	0.021028	1	PER1=9aa(342-350)	Family-wise	1716.para.1	RNF150;RNF130;RNF149;RNF128;RNF133;RNF13;RNF167	NO
	RNF130	ENST00000521389.1	CCDS4451.1	419	9	0.0214797	1	PER1=9aa(332-340)	Family-wise	1716.para.1	RNF150;RNF130;RNF149;RNF128;RNF133;RNF13;RNF167	NO
	RNF133	ENST00000340112.2	CCDS5784.1	376	9	0.0239362	1	PER1=9aa(321-329)	Family-wise	1716.para.1	RNF150;RNF130;RNF149;RNF128;RNF133;RNF13;RNF167	NO
	RNF149	ENST00000295317.3	CCDS2051.1	400	9	0.0225	1	PER1=9aa(337-345)	Family-wise	1716.para.1	RNF150;RNF130;RNF149;RNF128;RNF133;RNF13;RNF167	NO
	RNF150	ENST00000515673.2	CCDS34065.1	438	9	0.0205479	1	PER1=9aa(346-354)	Family-wise	1716.para.1	RNF150;RNF130;RNF149;RNF128;RNF133;RNF13;RNF167	NO
	RNF167	ENST00000262482.6	CCDS11060.1	350	9	0.0257143	1	PER1=9aa(299-307)	Family-wise	1716.para.1	RNF150;RNF130;RNF149;RNF128;RNF133;RNF13;RNF167	NO
	ROM1	ENST00000278833.3	CCDS8024.1	351	9	0.025641	1	PER1=9aa(211-219)	Family-wise	351.para.1	PRPH2;ROM1	NO
	RORA	ENST00000261523.5	CCDS10179.1	556	71	0.127698	4	PER1=14aa(353-366),PER2=19aa(388-406),PER3=29aa(408-436),PER4=9aa(538-546)	Family-wise	2681.para.1	NR1H3;NR1H2;NR1H4;RARB;RARA;RARG;THRB;NR1D2;NR1D1;PPARA;PPARD;PPARG;NR1I2;VDR;RORA	NO
	RP1	ENST00000220676.1	CCDS6160.1	2156	9	0.0041744	1	PER1=9aa(1244-1252)	Family-wise	2702.para.1	RP1L1;RP1	NO
	RPS6KA1	ENST00000531382.1	CCDS30649.1	744	14	0.0188172	1	PER1=14aa(77-90)	Family-wise	3028.para.2	RPS6KA4;RPS6KA5;RPS6KA3;RPS6KA2;RPS6KA1;RPS6KA6	NO
	RPS6KA2	ENST00000503859.1	CCDS34570.1	741	14	0.0188934	1	PER1=14aa(73-86)	Family-wise	3028.para.2	RPS6KA4;RPS6KA5;RPS6KA3;RPS6KA2;RPS6KA1;RPS6KA6	NO
	RPS6KA3	ENST00000379565.3	CCDS14197.1	740	14	0.0189189	1	PER1=14aa(74-87)	Family-wise	3028.para.2	RPS6KA4;RPS6KA5;RPS6KA3;RPS6KA2;RPS6KA1;RPS6KA6	NO
	RPS6KA4	ENST00000334205.4	CCDS8073.1	772	14	0.0181347	1	PER1=14aa(39-52)	Family-wise	3028.para.2	RPS6KA4;RPS6KA5;RPS6KA3;RPS6KA2;RPS6KA1;RPS6KA6	NO
	RPS6KA5	ENST00000261991.3	CCDS9893.1	802	14	0.0174564	1	PER1=14aa(55-68)	Family-wise	3028.para.2	RPS6KA4;RPS6KA5;RPS6KA3;RPS6KA2;RPS6KA1;RPS6KA6	NO
	RPS6KA6	ENST00000262752.2	CCDS14451.1	745	14	0.0187919	1	PER1=14aa(79-92)	Family-wise	3028.para.2	RPS6KA4;RPS6KA5;RPS6KA3;RPS6KA2;RPS6KA1;RPS6KA6	NO
	RRAS	ENST00000246792.3	CCDS12774.1	218	33	0.151376	2	PER1=19aa(34-52),PER2=14aa(79-92)	Family-wise	3537.para.2	RRAS2;RRAS;MRAS;NRAS;KRAS;HRAS;RALB;RALA;ERAS	NO
	RRAS2	ENST00000256196.4	CCDS7814.1	204	33	0.161765	2	PER1=19aa(19-37),PER2=14aa(64-77)	Family-wise	3537.para.2	RRAS2;RRAS;MRAS;NRAS;KRAS;HRAS;RALB;RALA;ERAS	NO
	RRH	ENST00000317735.4	CCDS3687.1	337	28	0.0830861	2	PER1=19aa(161-179),PER2=9aa(194-202)	Family-wise	3461.para.1	OPN1SW;RHO;OPN1LW;OPN1MW;OPN1MW2;OPN3;RRH;OPN4;OPN5	NO
	RSPO1	ENST00000356545.2	CCDS41304.1	263	14	0.0532319	1	PER1=14aa(65-78)	Family-wise	3346.para.1	RSPO3;RSPO2;RSPO1;RSPO4	NO
	RSPO2	ENST00000276659.5	CCDS6307.1	243	14	0.0576132	1	PER1=14aa(64-77)	Family-wise	3346.para.1	RSPO3;RSPO2;RSPO1;RSPO4	NO
	RSPO3	ENST00000356698.4	CCDS5135.1	272	14	0.0514706	1	PER1=14aa(66-79)	Family-wise	3346.para.1	RSPO3;RSPO2;RSPO1;RSPO4	NO
	RSPO4	ENST00000217260.4	CCDS42846.1	234	14	0.0598291	1	PER1=14aa(59-72)	Family-wise	3346.para.1	RSPO3;RSPO2;RSPO1;RSPO4	NO
	RUNX1T1	ENST00000436581.2	CCDS75766.1	663	14	0.0211161	1	PER1=14aa(261-274)	Family-wise	2365.para.1	RUNX1T1;CBFA2T3;CBFA2T2;DEAF1	NO
	RXRA	ENST00000481739.1	CCDS35172.1	462	60	0.12987	4	PER1=18aa(133-150),PER2=19aa(152-170),PER3=14aa(180-193),PER4=9aa(414-422)	Family-wise	1627.para.2	NR2E1;NR2E3;NR2F2;NR2F1;NR2F6;RXRA;RXRG;RXRB	NO
	RXRB	ENST00000374685.4	CCDS59007.1	537	60	0.111732	4	PER1=18aa(203-220),PER2=19aa(222-240),PER3=14aa(250-263),PER4=9aa(489-497)	Family-wise	1627.para.2	NR2E1;NR2E3;NR2F2;NR2F1;NR2F6;RXRA;RXRG;RXRB	NO
	RXRG	ENST00000359842.5	CCDS1248.1	463	60	0.12959	4	PER1=18aa(137-154),PER2=19aa(156-174),PER3=14aa(184-197),PER4=9aa(415-423)	Family-wise	1627.para.2	NR2E1;NR2E3;NR2F2;NR2F1;NR2F6;RXRA;RXRG;RXRB	NO
	RYR2	ENST00000366574.2	CCDS55691.1	4967	69	0.0138917	6	PER1=9aa(164-172),PER2=14aa(2305-2318),PER3=9aa(2399-2407),PER4=9aa(4737-4745),PER5=14aa(4817-4830),PER6=14aa(4862-4875)	Family-wise	1004.para.1	RYR3;RYR2;RYR1	NO
	RYR3	ENST00000389232.4	CCDS45210.1	4870	69	0.0141684	6	PER1=9aa(154-162),PER2=14aa(2202-2215),PER3=9aa(2296-2304),PER4=9aa(4640-4648),PER5=14aa(4720-4733),PER6=14aa(4765-4778)	Family-wise	1004.para.1	RYR3;RYR2;RYR1	NO
	SATB1	ENST00000417717.2	CCDS56242.1	795	14	0.0176101	1	PER1=14aa(394-407)	Family-wise	619.para.1	SATB2;SATB1	NO
	SCN10A	ENST00000449082.2	CCDS33736.1	1956	249	0.127301	16	PER1=19aa(211-229),PER2=9aa(246-254),PER3=14aa(385-398),PER4=9aa(756-764),PER5=9aa(776-784),PER6=14aa(786-799),PER7=9aa(801-809),PER8=9aa(829-837),PER9=19aa(877-895),PER10=44aa(1255-1298),PER11=9aa(1403-1411),PER12=14aa(1413-1426),PER13=19aa(1428-1446),PER14=19aa(1568-1586),PER15=19aa(1593-1611),PER16=14aa(1707-1720)	Family-wise	2614.para.3	SCN1A;SCN2A;SCN3A;SCN9A;SCN8A;SCN4A;SCN5A;SCN10A;SCN7A;SCN11A	NO
	SCN11A	ENST00000302328.3	CCDS33737.1	1791	249	0.139028	16	PER1=19aa(218-236),PER2=9aa(253-261),PER3=14aa(388-401),PER4=9aa(670-678),PER5=9aa(690-698),PER6=14aa(700-713),PER7=9aa(715-723),PER8=9aa(748-756),PER9=19aa(798-816),PER10=44aa(1152-1195),PER11=9aa(1293-1301),PER12=14aa(1303-1316),PER13=19aa(1318-1336),PER14=19aa(1458-1476),PER15=19aa(1483-1501),PER16=14aa(1589-1602)	Family-wise	2614.para.3	SCN1A;SCN2A;SCN3A;SCN9A;SCN8A;SCN4A;SCN5A;SCN10A;SCN7A;SCN11A	NO
	SCN1A	ENST00000303395.4	CCDS54413.1	2009	249	0.123942	16	PER1=19aa(212-230),PER2=9aa(247-255),PER3=14aa(411-424),PER4=9aa(859-867),PER5=9aa(879-887),PER6=14aa(889-902),PER7=9aa(904-912),PER8=9aa(931-939),PER9=19aa(979-997),PER10=44aa(1321-1364),PER11=9aa(1468-1476),PER12=14aa(1478-1491),PER13=19aa(1493-1511),PER14=19aa(1631-1649),PER15=19aa(1656-1674),PER16=14aa(1771-1784)	Family-wise	2614.para.3	SCN1A;SCN2A;SCN3A;SCN9A;SCN8A;SCN4A;SCN5A;SCN10A;SCN7A;SCN11A	NO
	SCN2A	ENST00000357398.3	CCDS33313.1	2005	249	0.12419	16	PER1=19aa(213-231),PER2=9aa(248-256),PER3=14aa(413-426),PER4=9aa(850-858),PER5=9aa(870-878),PER6=14aa(880-893),PER7=9aa(895-903),PER8=9aa(922-930),PER9=19aa(970-988),PER10=44aa(1311-1354),PER11=9aa(1458-1466),PER12=14aa(1468-1481),PER13=19aa(1483-1501),PER14=19aa(1621-1639),PER15=19aa(1646-1664),PER16=14aa(1761-1774)	Family-wise	2614.para.3	SCN1A;SCN2A;SCN3A;SCN9A;SCN8A;SCN4A;SCN5A;SCN10A;SCN7A;SCN11A	NO
	SCN3A	ENST00000283254.7	CCDS33312.1	2000	249	0.1245	16	PER1=19aa(212-230),PER2=9aa(247-255),PER3=14aa(412-425),PER4=9aa(851-859),PER5=9aa(871-879),PER6=14aa(881-894),PER7=9aa(896-904),PER8=9aa(923-931),PER9=19aa(971-989),PER10=44aa(1309-1352),PER11=9aa(1453-1461),PER12=14aa(1463-1476),PER13=19aa(1478-1496),PER14=19aa(1616-1634),PER15=19aa(1641-1659),PER16=14aa(1756-1769)	Family-wise	2614.para.3	SCN1A;SCN2A;SCN3A;SCN9A;SCN8A;SCN4A;SCN5A;SCN10A;SCN7A;SCN11A	NO
	SCN4A	ENST00000435607.1	CCDS45761.1	1836	249	0.135621	16	PER1=19aa(215-233),PER2=9aa(250-258),PER3=14aa(435-448),PER4=9aa(669-677),PER5=9aa(689-697),PER6=14aa(699-712),PER7=9aa(714-722),PER8=9aa(741-749),PER9=19aa(789-807),PER10=44aa(1134-1177),PER11=9aa(1280-1288),PER12=14aa(1290-1303),PER13=19aa(1305-1323),PER14=19aa(1443-1461),PER15=19aa(1468-1486),PER16=14aa(1583-1596)	Family-wise	2614.para.3	SCN1A;SCN2A;SCN3A;SCN9A;SCN8A;SCN4A;SCN5A;SCN10A;SCN7A;SCN11A	NO
	SCN5A	ENST00000413689.1	CCDS46799.1	2016	249	0.123512	16	PER1=19aa(215-233),PER2=9aa(250-258),PER3=14aa(401-414),PER4=9aa(808-816),PER5=9aa(828-836),PER6=14aa(838-851),PER7=9aa(853-861),PER8=9aa(878-886),PER9=19aa(926-944),PER10=44aa(1308-1351),PER11=9aa(1455-1463),PER12=14aa(1465-1478),PER13=19aa(1480-1498),PER14=19aa(1618-1636),PER15=19aa(1643-1661),PER16=14aa(1757-1770)	Family-wise	2614.para.3	SCN1A;SCN2A;SCN3A;SCN9A;SCN8A;SCN4A;SCN5A;SCN10A;SCN7A;SCN11A	NO
	SCN7A	ENST00000409855.1	CCDS46442.1	1682	248	0.147444	16	PER1=19aa(202-220),PER2=9aa(237-245),PER3=14aa(382-395),PER4=9aa(596-604),PER5=9aa(616-624),PER6=14aa(626-639),PER7=9aa(641-649),PER8=9aa(668-676),PER9=18aa(716-733),PER10=44aa(1032-1075),PER11=9aa(1178-1186),PER12=14aa(1188-1201),PER13=19aa(1203-1221),PER14=19aa(1341-1359),PER15=19aa(1366-1384),PER16=14aa(1481-1494)	Family-wise	2614.para.3	SCN1A;SCN2A;SCN3A;SCN9A;SCN8A;SCN4A;SCN5A;SCN10A;SCN7A;SCN11A	NO
	SCN8A	ENST00000354534.6	CCDS44891.1	1980	249	0.125758	16	PER1=19aa(216-234),PER2=9aa(251-259),PER3=14aa(399-412),PER4=9aa(844-852),PER5=9aa(864-872),PER6=14aa(874-887),PER7=9aa(889-897),PER8=9aa(916-924),PER9=19aa(964-982),PER10=44aa(1301-1344),PER11=9aa(1449-1457),PER12=14aa(1459-1472),PER13=19aa(1474-1492),PER14=19aa(1612-1630),PER15=19aa(1637-1655),PER16=14aa(1751-1764)	Family-wise	2614.para.3	SCN1A;SCN2A;SCN3A;SCN9A;SCN8A;SCN4A;SCN5A;SCN10A;SCN7A;SCN11A	NO
	SCN9A	ENST00000409672.1	CCDS46441.1	1977	249	0.125948	16	PER1=19aa(210-228),PER2=9aa(245-253),PER3=14aa(390-403),PER4=9aa(824-832),PER5=9aa(844-852),PER6=14aa(854-867),PER7=9aa(869-877),PER8=9aa(896-904),PER9=19aa(944-962),PER10=44aa(1284-1327),PER11=9aa(1431-1439),PER12=14aa(1441-1454),PER13=19aa(1456-1474),PER14=19aa(1594-1612),PER15=19aa(1619-1637),PER16=14aa(1734-1747)	Family-wise	2614.para.3	SCN1A;SCN2A;SCN3A;SCN9A;SCN8A;SCN4A;SCN5A;SCN10A;SCN7A;SCN11A	NO
	SCNN1A	ENST00000360168.3	CCDS53738.1	728	9	0.0123626	1	PER1=9aa(699-707)	Family-wise	2562.para.1	SCNN1G;SCNN1B;SCNN1A;SCNN1D	NO
	SCNN1D	ENST00000379116.5	CCDS44037.2	802	3	0.00374065	1	PER1=3aa(771-773)	Family-wise	2562.para.1	SCNN1G;SCNN1B;SCNN1A;SCNN1D	NO
	SCNN1G	ENST00000300061.2	CCDS10608.1	649	9	0.0138675	1	PER1=9aa(623-631)	Family-wise	2562.para.1	SCNN1G;SCNN1B;SCNN1A;SCNN1D	NO
	SDR9C7	ENST00000293502.1	CCDS8926.1	313	9	0.028754	1	PER1=9aa(170-178)	Family-wise	1183.para.1	HSD11B2;HSD17B2;RDH16;HSD17B6;RDH5;SDR9C7;DHRS9;BDH1;HSD17B1;RDH8;DHRS7C;DHRS7B;DHRS7;KDSR	NO
	SERPINA1	ENST00000448921.1	CCDS9925.1	418	18	0.0430622	2	PER1=9aa(76-84),PER2=9aa(402-410)	Family-wise	3001.para.1	SERPINI1;SERPINI2;SERPINE1;SERPINE2;SERPINE3;SERPINA3;SERPINA5;SERPINA6;SERPINA9;SERPINA7;SERPINA4;SERPINA11;SERPINA1;SERPINA12;SERPIND1;SERPINA10	NO
	SERPINA10	ENST00000393096.1	CCDS9923.1	444	18	0.0405405	2	PER1=9aa(100-108),PER2=9aa(428-436)	Family-wise	3001.para.1	SERPINI1;SERPINI2;SERPINE1;SERPINE2;SERPINE3;SERPINA3;SERPINA5;SERPINA6;SERPINA9;SERPINA7;SERPINA4;SERPINA11;SERPINA1;SERPINA12;SERPIND1;SERPINA10	NO
	SERPINA11	ENST00000334708.3	CCDS32149.1	422	18	0.042654	2	PER1=9aa(75-83),PER2=9aa(406-414)	Family-wise	3001.para.1	SERPINI1;SERPINI2;SERPINE1;SERPINE2;SERPINE3;SERPINA3;SERPINA5;SERPINA6;SERPINA9;SERPINA7;SERPINA4;SERPINA11;SERPINA1;SERPINA12;SERPIND1;SERPINA10	NO
	SERPINA12	ENST00000341228.2	CCDS9926.1	414	18	0.0434783	2	PER1=9aa(74-82),PER2=9aa(398-406)	Family-wise	3001.para.1	SERPINI1;SERPINI2;SERPINE1;SERPINE2;SERPINE3;SERPINA3;SERPINA5;SERPINA6;SERPINA9;SERPINA7;SERPINA4;SERPINA11;SERPINA1;SERPINA12;SERPIND1;SERPINA10	NO
	SERPINA3	ENST00000467132.1	CCDS32150.1	423	18	0.0425532	2	PER1=9aa(75-83),PER2=9aa(407-415)	Family-wise	3001.para.1	SERPINI1;SERPINI2;SERPINE1;SERPINE2;SERPINE3;SERPINA3;SERPINA5;SERPINA6;SERPINA9;SERPINA7;SERPINA4;SERPINA11;SERPINA1;SERPINA12;SERPIND1;SERPINA10	NO
	SERPINA4	ENST00000557004.1	CCDS9927.1	427	18	0.0421546	2	PER1=9aa(77-85),PER2=9aa(411-419)	Family-wise	3001.para.1	SERPINI1;SERPINI2;SERPINE1;SERPINE2;SERPINE3;SERPINA3;SERPINA5;SERPINA6;SERPINA9;SERPINA7;SERPINA4;SERPINA11;SERPINA1;SERPINA12;SERPIND1;SERPINA10	NO
	SERPINA5	ENST00000329597.7	CCDS9928.1	406	15	0.0369458	2	PER1=9aa(67-75),PER2=6aa(396-401)	Family-wise	3001.para.1	SERPINI1;SERPINI2;SERPINE1;SERPINE2;SERPINE3;SERPINA3;SERPINA5;SERPINA6;SERPINA9;SERPINA7;SERPINA4;SERPINA11;SERPINA1;SERPINA12;SERPIND1;SERPINA10	NO
	SERPINA6	ENST00000341584.3	CCDS9924.1	405	18	0.0444444	2	PER1=9aa(65-73),PER2=9aa(391-399)	Family-wise	3001.para.1	SERPINI1;SERPINI2;SERPINE1;SERPINE2;SERPINE3;SERPINA3;SERPINA5;SERPINA6;SERPINA9;SERPINA7;SERPINA4;SERPINA11;SERPINA1;SERPINA12;SERPIND1;SERPINA10	NO
	SERPINA7	ENST00000327674.4	CCDS14518.1	415	18	0.0433735	2	PER1=9aa(68-76),PER2=9aa(399-407)	Family-wise	3001.para.1	SERPINI1;SERPINI2;SERPINE1;SERPINE2;SERPINE3;SERPINA3;SERPINA5;SERPINA6;SERPINA9;SERPINA7;SERPINA4;SERPINA11;SERPINA1;SERPINA12;SERPIND1;SERPINA10	NO
	SERPINA9	ENST00000337425.5	CCDS41982.1	435	18	0.0413793	2	PER1=9aa(88-96),PER2=9aa(419-427)	Family-wise	3001.para.1	SERPINI1;SERPINI2;SERPINE1;SERPINE2;SERPINE3;SERPINA3;SERPINA5;SERPINA6;SERPINA9;SERPINA7;SERPINA4;SERPINA11;SERPINA1;SERPINA12;SERPIND1;SERPINA10	NO
	SERPINB1	ENST00000380739.5	CCDS4477.1	379	9	0.0237467	1	PER1=9aa(351-359)	Family-wise	1849.para.1	SERPINB8;SERPINB6;SERPINB9;SERPINB1;SERPINB4;SERPINB3;SERPINB13;SERPINB2;SERPINB12;SERPINB10;SERPINB7;SERPINC1;SERPINB5	NO
	SERPINB10	ENST00000238508.3	CCDS11990.1	397	9	0.02267	1	PER1=9aa(369-377)	Family-wise	1849.para.1	SERPINB8;SERPINB6;SERPINB9;SERPINB1;SERPINB4;SERPINB3;SERPINB13;SERPINB2;SERPINB12;SERPINB10;SERPINB7;SERPINC1;SERPINB5	NO
	SERPINB12	ENST00000269491.1	CCDS77194.1	425	9	0.0211765	1	PER1=9aa(397-405)	Family-wise	1849.para.1	SERPINB8;SERPINB6;SERPINB9;SERPINB1;SERPINB4;SERPINB3;SERPINB13;SERPINB2;SERPINB12;SERPINB10;SERPINB7;SERPINC1;SERPINB5	NO
	SERPINB13	ENST00000344731.5	CCDS77195.1	400	9	0.0225	1	PER1=9aa(372-380)	Family-wise	1849.para.1	SERPINB8;SERPINB6;SERPINB9;SERPINB1;SERPINB4;SERPINB3;SERPINB13;SERPINB2;SERPINB12;SERPINB10;SERPINB7;SERPINC1;SERPINB5	NO
	SERPINB2	ENST00000457692.1	CCDS11989.1	415	9	0.0216867	1	PER1=9aa(387-395)	Family-wise	1849.para.1	SERPINB8;SERPINB6;SERPINB9;SERPINB1;SERPINB4;SERPINB3;SERPINB13;SERPINB2;SERPINB12;SERPINB10;SERPINB7;SERPINC1;SERPINB5	NO
	SERPINB3	ENST00000283752.5	CCDS11987.1	390	9	0.0230769	1	PER1=9aa(362-370)	Family-wise	1849.para.1	SERPINB8;SERPINB6;SERPINB9;SERPINB1;SERPINB4;SERPINB3;SERPINB13;SERPINB2;SERPINB12;SERPINB10;SERPINB7;SERPINC1;SERPINB5	NO
	SERPINB4	ENST00000341074.5	CCDS11986.1	390	9	0.0230769	1	PER1=9aa(362-370)	Family-wise	1849.para.1	SERPINB8;SERPINB6;SERPINB9;SERPINB1;SERPINB4;SERPINB3;SERPINB13;SERPINB2;SERPINB12;SERPINB10;SERPINB7;SERPINC1;SERPINB5	NO
	SERPINB5	ENST00000382771.4	CCDS32839.1	375	9	0.024	1	PER1=9aa(347-355)	Family-wise	1849.para.1	SERPINB8;SERPINB6;SERPINB9;SERPINB1;SERPINB4;SERPINB3;SERPINB13;SERPINB2;SERPINB12;SERPINB10;SERPINB7;SERPINC1;SERPINB5	NO
	SERPINB6	ENST00000380520.1	CCDS75387.1	395	9	0.0227848	1	PER1=9aa(367-375)	Family-wise	1849.para.1	SERPINB8;SERPINB6;SERPINB9;SERPINB1;SERPINB4;SERPINB3;SERPINB13;SERPINB2;SERPINB12;SERPINB10;SERPINB7;SERPINC1;SERPINB5	NO
	SERPINB7	ENST00000398019.2	CCDS11988.1	380	9	0.0236842	1	PER1=9aa(354-362)	Family-wise	1849.para.1	SERPINB8;SERPINB6;SERPINB9;SERPINB1;SERPINB4;SERPINB3;SERPINB13;SERPINB2;SERPINB12;SERPINB10;SERPINB7;SERPINC1;SERPINB5	NO
	SERPINB8	ENST00000397985.2	CCDS11991.1	374	9	0.0240642	1	PER1=9aa(346-354)	Family-wise	1849.para.1	SERPINB8;SERPINB6;SERPINB9;SERPINB1;SERPINB4;SERPINB3;SERPINB13;SERPINB2;SERPINB12;SERPINB10;SERPINB7;SERPINC1;SERPINB5	NO
	SERPINB9	ENST00000380698.4	CCDS4478.1	376	9	0.0239362	1	PER1=9aa(348-356)	Family-wise	1849.para.1	SERPINB8;SERPINB6;SERPINB9;SERPINB1;SERPINB4;SERPINB3;SERPINB13;SERPINB2;SERPINB12;SERPINB10;SERPINB7;SERPINC1;SERPINB5	NO
	SERPINC1	ENST00000367698.3	CCDS1313.1	464	9	0.0193966	1	PER1=9aa(433-441)	Family-wise	1849.para.1	SERPINB8;SERPINB6;SERPINB9;SERPINB1;SERPINB4;SERPINB3;SERPINB13;SERPINB2;SERPINB12;SERPINB10;SERPINB7;SERPINC1;SERPINB5	NO
	SERPIND1	ENST00000215727.5	CCDS13783.1	499	18	0.0360721	2	PER1=9aa(153-161),PER2=9aa(483-491)	Family-wise	3001.para.1	SERPINI1;SERPINI2;SERPINE1;SERPINE2;SERPINE3;SERPINA3;SERPINA5;SERPINA6;SERPINA9;SERPINA7;SERPINA4;SERPINA11;SERPINA1;SERPINA12;SERPIND1;SERPINA10	NO
	SERPINE1	ENST00000223095.4	CCDS5711.1	402	18	0.0447761	2	PER1=9aa(57-65),PER2=9aa(389-397)	Family-wise	3001.para.1	SERPINI1;SERPINI2;SERPINE1;SERPINE2;SERPINE3;SERPINA3;SERPINA5;SERPINA6;SERPINA9;SERPINA7;SERPINA4;SERPINA11;SERPINA1;SERPINA12;SERPIND1;SERPINA10	NO
	SERPINE2	ENST00000447280.2	CCDS46525.1	409	18	0.0440098	2	PER1=9aa(65-73),PER2=9aa(396-404)	Family-wise	3001.para.1	SERPINI1;SERPINI2;SERPINE1;SERPINE2;SERPINE3;SERPINA3;SERPINA5;SERPINA6;SERPINA9;SERPINA7;SERPINA4;SERPINA11;SERPINA1;SERPINA12;SERPIND1;SERPINA10	NO
	SERPINE3	ENST00000521255.1	CCDS53870.1	424	18	0.0424528	2	PER1=9aa(52-60),PER2=9aa(389-397)	Family-wise	3001.para.1	SERPINI1;SERPINI2;SERPINE1;SERPINE2;SERPINE3;SERPINA3;SERPINA5;SERPINA6;SERPINA9;SERPINA7;SERPINA4;SERPINA11;SERPINA1;SERPINA12;SERPIND1;SERPINA10	NO
	SERPINI1	ENST00000295777.5	CCDS3203.1	410	18	0.0439024	2	PER1=9aa(48-56),PER2=9aa(384-392)	Family-wise	3001.para.1	SERPINI1;SERPINI2;SERPINE1;SERPINE2;SERPINE3;SERPINA3;SERPINA5;SERPINA6;SERPINA9;SERPINA7;SERPINA4;SERPINA11;SERPINA1;SERPINA12;SERPIND1;SERPINA10	NO
	SERPINI2	ENST00000476257.1	CCDS75047.1	415	18	0.0433735	2	PER1=9aa(57-65),PER2=9aa(389-397)	Family-wise	3001.para.1	SERPINI1;SERPINI2;SERPINE1;SERPINE2;SERPINE3;SERPINA3;SERPINA5;SERPINA6;SERPINA9;SERPINA7;SERPINA4;SERPINA11;SERPINA1;SERPINA12;SERPIND1;SERPINA10	NO
	SFN	ENST00000339276.4	CCDS288.1	248	9	0.0362903	1	PER1=9aa(122-130)	Family-wise	1338.para.1	YWHAZ;YWHAB;YWHAQ;YWHAG;YWHAH;SFN;YWHAE	NO
	SGCA	ENST00000262018.3	CCDS32679.1	387	9	0.0232558	1	PER1=9aa(242-250)	Family-wise	2810.para.1	SGCA;SGCE	NO
	SGCE	ENST00000445866.2	CCDS47643.1	462	9	0.0194805	1	PER1=9aa(268-276)	Family-wise	2810.para.1	SGCA;SGCE	NO
	SH2D1A	ENST00000371139.4	CCDS14608.1	128	9	0.0703125	1	PER1=9aa(26-34)	Family-wise	1818.para.1	SH2D1B;SH2D1A	NO
	SH2D1B	ENST00000367929.2	CCDS30928.1	132	9	0.0681818	1	PER1=9aa(25-33)	Family-wise	1818.para.1	SH2D1B;SH2D1A	NO
	SHOX2	ENST00000389589.4	CCDS33884.2	355	14	0.0394366	1	PER1=14aa(207-220)	Family-wise	92.para.2	ALX3;ALX1;RAX;SHOX2;OTP	NO
	SIM1	ENST00000369208.3	CCDS5045.1	766	18	0.0234987	1	PER1=18aa(504-521)	Family-wise	1782.para.3	SIM1;SIM2;NPAS3;HIF1A;EPAS1;HIF3A;NPAS2;CLOCK	NO
	SIM2	ENST00000290399.6	CCDS13646.1	667	4	0.005997	1	PER1=4aa(498-501)	Family-wise	1782.para.3	SIM1;SIM2;NPAS3;HIF1A;EPAS1;HIF3A;NPAS2;CLOCK	NO
	SLC26A1	ENST00000361661.2	CCDS33934.1	701	37	0.0527817	3	PER1=9aa(82-90),PER2=19aa(115-133),PER3=9aa(612-620)	Family-wise	3007.para.1	SLC26A5;SLC26A6;SLC26A4;SLC26A3;SLC26A9;SLC26A2;SLC26A1;SLC26A10;SLC26A7;SLC26A8	NO
	SLC26A10	ENST00000320442.4	CCDS8949.2	563	32	0.0568384	3	PER1=4aa(41-44),PER2=19aa(69-87),PER3=9aa(467-475)	Family-wise	3007.para.1	SLC26A5;SLC26A6;SLC26A4;SLC26A3;SLC26A9;SLC26A2;SLC26A1;SLC26A10;SLC26A7;SLC26A8	NO
	SLC26A2	ENST00000286298.4	CCDS4300.1	739	37	0.0500677	3	PER1=9aa(121-129),PER2=19aa(154-172),PER3=9aa(649-657)	Family-wise	3007.para.1	SLC26A5;SLC26A6;SLC26A4;SLC26A3;SLC26A9;SLC26A2;SLC26A1;SLC26A10;SLC26A7;SLC26A8	NO
	SLC26A3	ENST00000340010.5	CCDS5748.1	764	37	0.0484293	3	PER1=9aa(86-94),PER2=19aa(119-137),PER3=9aa(649-657)	Family-wise	3007.para.1	SLC26A5;SLC26A6;SLC26A4;SLC26A3;SLC26A9;SLC26A2;SLC26A1;SLC26A10;SLC26A7;SLC26A8	NO
	SLC26A4	ENST00000265715.3	CCDS5746.1	780	37	0.0474359	3	PER1=9aa(97-105),PER2=19aa(130-148),PER3=9aa(658-666)	Family-wise	3007.para.1	SLC26A5;SLC26A6;SLC26A4;SLC26A3;SLC26A9;SLC26A2;SLC26A1;SLC26A10;SLC26A7;SLC26A8	NO
	SLC26A5	ENST00000306312.3	CCDS5733.1	744	37	0.0497312	3	PER1=9aa(93-101),PER2=19aa(126-144),PER3=9aa(642-650)	Family-wise	3007.para.1	SLC26A5;SLC26A6;SLC26A4;SLC26A3;SLC26A9;SLC26A2;SLC26A1;SLC26A10;SLC26A7;SLC26A8	NO
	SLC26A6	ENST00000395550.2	CCDS43087.1	759	37	0.0487484	3	PER1=9aa(103-111),PER2=19aa(136-154),PER3=9aa(671-679)	Family-wise	3007.para.1	SLC26A5;SLC26A6;SLC26A4;SLC26A3;SLC26A9;SLC26A2;SLC26A1;SLC26A10;SLC26A7;SLC26A8	NO
	SLC26A7	ENST00000309536.2	CCDS6255.1	663	37	0.0558069	3	PER1=9aa(60-68),PER2=19aa(93-111),PER3=9aa(572-580)	Family-wise	3007.para.1	SLC26A5;SLC26A6;SLC26A4;SLC26A3;SLC26A9;SLC26A2;SLC26A1;SLC26A10;SLC26A7;SLC26A8	NO
	SLC26A8	ENST00000490799.1	CCDS4813.1	970	37	0.0381443	3	PER1=9aa(105-113),PER2=19aa(140-158),PER3=9aa(724-732)	Family-wise	3007.para.1	SLC26A5;SLC26A6;SLC26A4;SLC26A3;SLC26A9;SLC26A2;SLC26A1;SLC26A10;SLC26A7;SLC26A8	NO
	SLC26A9	ENST00000367134.2	CCDS30989.1	887	37	0.0417136	3	PER1=9aa(84-92),PER2=19aa(117-135),PER3=9aa(665-673)	Family-wise	3007.para.1	SLC26A5;SLC26A6;SLC26A4;SLC26A3;SLC26A9;SLC26A2;SLC26A1;SLC26A10;SLC26A7;SLC26A8	NO
	SLC4A10	ENST00000446997.1	CCDS54411.1	1118	9	0.00805009	1	PER1=9aa(905-913)	Family-wise	2483.para.2	SLC4A4;SLC4A5;SLC4A10;SLC4A8;SLC4A7;SLC4A9;SLC4A1	NO
	SLC4A4	ENST00000425175.1	CCDS47071.1	1094	9	0.00822669	1	PER1=9aa(872-880)	Family-wise	2483.para.2	SLC4A4;SLC4A5;SLC4A10;SLC4A8;SLC4A7;SLC4A9;SLC4A1	NO
	SLC4A5	ENST00000377634.4	CCDS1936.1	1137	9	0.00791557	1	PER1=9aa(923-931)	Family-wise	2483.para.2	SLC4A4;SLC4A5;SLC4A10;SLC4A8;SLC4A7;SLC4A9;SLC4A1	NO
	SLC4A7	ENST00000295736.5	CCDS33721.1	1214	9	0.00741351	1	PER1=9aa(1004-1012)	Family-wise	2483.para.2	SLC4A4;SLC4A5;SLC4A10;SLC4A8;SLC4A7;SLC4A9;SLC4A1	NO
	SLC4A8	ENST00000453097.2	CCDS44890.1	1093	9	0.00823422	1	PER1=9aa(874-882)	Family-wise	2483.para.2	SLC4A4;SLC4A5;SLC4A10;SLC4A8;SLC4A7;SLC4A9;SLC4A1	NO
	SLC4A9	ENST00000230993.6	CCDS58973.1	983	9	0.00915565	1	PER1=9aa(807-815)	Family-wise	2483.para.2	SLC4A4;SLC4A5;SLC4A10;SLC4A8;SLC4A7;SLC4A9;SLC4A1	NO
	SLC5A1	ENST00000266088.4	CCDS13902.1	664	9	0.0135542	1	PER1=9aa(292-300)	Family-wise	1812.para.1	SLC5A12;SLC5A8;SLC5A5;SLC5A6;SLC5A4;SLC5A1;SLC5A2;SLC5A9;SLC5A10;SLC5A11;SLC5A3	NO
	SLC5A10	ENST00000395647.2	CCDS11201.2	612	9	0.0147059	1	PER1=9aa(279-287)	Family-wise	1812.para.1	SLC5A12;SLC5A8;SLC5A5;SLC5A6;SLC5A4;SLC5A1;SLC5A2;SLC5A9;SLC5A10;SLC5A11;SLC5A3	NO
	SLC5A11	ENST00000347898.3	CCDS10625.1	675	9	0.0133333	1	PER1=9aa(287-295)	Family-wise	1812.para.1	SLC5A12;SLC5A8;SLC5A5;SLC5A6;SLC5A4;SLC5A1;SLC5A2;SLC5A9;SLC5A10;SLC5A11;SLC5A3	NO
	SLC5A12	ENST00000396005.3	CCDS7860.2	618	9	0.0145631	1	PER1=9aa(254-262)	Family-wise	1812.para.1	SLC5A12;SLC5A8;SLC5A5;SLC5A6;SLC5A4;SLC5A1;SLC5A2;SLC5A9;SLC5A10;SLC5A11;SLC5A3	NO
	SLC5A2	ENST00000330498.3	CCDS10714.1	672	9	0.0133929	1	PER1=9aa(292-300)	Family-wise	1812.para.1	SLC5A12;SLC5A8;SLC5A5;SLC5A6;SLC5A4;SLC5A1;SLC5A2;SLC5A9;SLC5A10;SLC5A11;SLC5A3	NO
	SLC5A3	ENST00000381151.3	CCDS33549.1	718	9	0.0125348	1	PER1=9aa(277-285)	Family-wise	1812.para.1	SLC5A12;SLC5A8;SLC5A5;SLC5A6;SLC5A4;SLC5A1;SLC5A2;SLC5A9;SLC5A10;SLC5A11;SLC5A3	NO
	SLC5A4	ENST00000266086.4	CCDS13903.1	659	9	0.0136571	1	PER1=9aa(292-300)	Family-wise	1812.para.1	SLC5A12;SLC5A8;SLC5A5;SLC5A6;SLC5A4;SLC5A1;SLC5A2;SLC5A9;SLC5A10;SLC5A11;SLC5A3	NO
	SLC5A5	ENST00000222248.3	CCDS12368.1	643	9	0.0139969	1	PER1=9aa(260-268)	Family-wise	1812.para.1	SLC5A12;SLC5A8;SLC5A5;SLC5A6;SLC5A4;SLC5A1;SLC5A2;SLC5A9;SLC5A10;SLC5A11;SLC5A3	NO
	SLC5A6	ENST00000310574.3	CCDS1740.1	635	9	0.0141732	1	PER1=9aa(272-280)	Family-wise	1812.para.1	SLC5A12;SLC5A8;SLC5A5;SLC5A6;SLC5A4;SLC5A1;SLC5A2;SLC5A9;SLC5A10;SLC5A11;SLC5A3	NO
	SLC5A8	ENST00000536262.2	CCDS9080.1	610	9	0.0147541	1	PER1=9aa(258-266)	Family-wise	1812.para.1	SLC5A12;SLC5A8;SLC5A5;SLC5A6;SLC5A4;SLC5A1;SLC5A2;SLC5A9;SLC5A10;SLC5A11;SLC5A3	NO
	SLC5A9	ENST00000236495.5	CCDS44136.1	706	9	0.0127479	1	PER1=9aa(321-329)	Family-wise	1812.para.1	SLC5A12;SLC5A8;SLC5A5;SLC5A6;SLC5A4;SLC5A1;SLC5A2;SLC5A9;SLC5A10;SLC5A11;SLC5A3	NO
	SLC6A1	ENST00000287766.4	CCDS2603.1	599	18	0.0300501	2	PER1=9aa(280-288),PER2=9aa(359-367)	Family-wise	2991.para.1	SLC6A5;SLC6A14;SLC6A7;SLC6A9;SLC6A13;SLC6A12;SLC6A11;SLC6A6;SLC6A8;SLC6A1;SLC6A2;SLC6A3;SLC6A4	NO
	SLC6A11	ENST00000254488.2	CCDS2602.1	632	18	0.028481	2	PER1=9aa(294-302),PER2=9aa(373-381)	Family-wise	2991.para.1	SLC6A5;SLC6A14;SLC6A7;SLC6A9;SLC6A13;SLC6A12;SLC6A11;SLC6A6;SLC6A8;SLC6A1;SLC6A2;SLC6A3;SLC6A4	NO
	SLC6A12	ENST00000428720.1	CCDS8501.1	614	18	0.029316	2	PER1=9aa(279-287),PER2=9aa(358-366)	Family-wise	2991.para.1	SLC6A5;SLC6A14;SLC6A7;SLC6A9;SLC6A13;SLC6A12;SLC6A11;SLC6A6;SLC6A8;SLC6A1;SLC6A2;SLC6A3;SLC6A4	NO
	SLC6A13	ENST00000343164.4	CCDS8502.1	602	18	0.0299003	2	PER1=9aa(274-282),PER2=9aa(353-361)	Family-wise	2991.para.1	SLC6A5;SLC6A14;SLC6A7;SLC6A9;SLC6A13;SLC6A12;SLC6A11;SLC6A6;SLC6A8;SLC6A1;SLC6A2;SLC6A3;SLC6A4	NO
	SLC6A14	ENST00000371900.4	CCDS14570.1	642	18	0.0280374	2	PER1=9aa(307-315),PER2=9aa(386-394)	Family-wise	2991.para.1	SLC6A5;SLC6A14;SLC6A7;SLC6A9;SLC6A13;SLC6A12;SLC6A11;SLC6A6;SLC6A8;SLC6A1;SLC6A2;SLC6A3;SLC6A4	NO
	SLC6A2	ENST00000219833.8	CCDS54011.1	628	18	0.0286624	2	PER1=9aa(303-311),PER2=9aa(382-390)	Family-wise	2991.para.1	SLC6A5;SLC6A14;SLC6A7;SLC6A9;SLC6A13;SLC6A12;SLC6A11;SLC6A6;SLC6A8;SLC6A1;SLC6A2;SLC6A3;SLC6A4	NO
	SLC6A3	ENST00000270349.9	CCDS3863.1	620	18	0.0290323	2	PER1=9aa(306-314),PER2=9aa(385-393)	Family-wise	2991.para.1	SLC6A5;SLC6A14;SLC6A7;SLC6A9;SLC6A13;SLC6A12;SLC6A11;SLC6A6;SLC6A8;SLC6A1;SLC6A2;SLC6A3;SLC6A4	NO
	SLC6A4	ENST00000401766.2	CCDS11256.1	630	18	0.0285714	2	PER1=9aa(321-329),PER2=9aa(401-409)	Family-wise	2991.para.1	SLC6A5;SLC6A14;SLC6A7;SLC6A9;SLC6A13;SLC6A12;SLC6A11;SLC6A6;SLC6A8;SLC6A1;SLC6A2;SLC6A3;SLC6A4	NO
	SLC6A5	ENST00000525748.1	CCDS7854.1	797	18	0.0225847	2	PER1=9aa(462-470),PER2=9aa(541-549)	Family-wise	2991.para.1	SLC6A5;SLC6A14;SLC6A7;SLC6A9;SLC6A13;SLC6A12;SLC6A11;SLC6A6;SLC6A8;SLC6A1;SLC6A2;SLC6A3;SLC6A4	NO
	SLC6A6	ENST00000454876.2	CCDS77704.1	721	18	0.0249653	2	PER1=9aa(387-395),PER2=9aa(466-474)	Family-wise	2991.para.1	SLC6A5;SLC6A14;SLC6A7;SLC6A9;SLC6A13;SLC6A12;SLC6A11;SLC6A6;SLC6A8;SLC6A1;SLC6A2;SLC6A3;SLC6A4	NO
	SLC6A7	ENST00000230671.2	CCDS4305.1	636	18	0.0283019	2	PER1=9aa(283-291),PER2=9aa(362-370)	Family-wise	2991.para.1	SLC6A5;SLC6A14;SLC6A7;SLC6A9;SLC6A13;SLC6A12;SLC6A11;SLC6A6;SLC6A8;SLC6A1;SLC6A2;SLC6A3;SLC6A4	NO
	SLC6A8	ENST00000253122.5	CCDS14726.1	635	18	0.0283465	2	PER1=9aa(301-309),PER2=9aa(380-388)	Family-wise	2991.para.1	SLC6A5;SLC6A14;SLC6A7;SLC6A9;SLC6A13;SLC6A12;SLC6A11;SLC6A6;SLC6A8;SLC6A1;SLC6A2;SLC6A3;SLC6A4	NO
	SLC6A9	ENST00000360584.2	CCDS41317.1	706	18	0.0254958	2	PER1=9aa(356-364),PER2=9aa(435-443)	Family-wise	2991.para.1	SLC6A5;SLC6A14;SLC6A7;SLC6A9;SLC6A13;SLC6A12;SLC6A11;SLC6A6;SLC6A8;SLC6A1;SLC6A2;SLC6A3;SLC6A4	NO
	SLC9A1	ENST00000263980.3	CCDS295.1	815	9	0.0110429	1	PER1=9aa(305-313)	Family-wise	2715.para.2	SLC9A4;SLC9A2;SLC9A1;SLC9A5;SLC9A3	NO
	SLC9A2	ENST00000233969.2	CCDS2062.1	812	9	0.0110837	1	PER1=9aa(285-293)	Family-wise	2715.para.2	SLC9A4;SLC9A2;SLC9A1;SLC9A5;SLC9A3	NO
	SLC9A3	ENST00000264938.3	CCDS3855.1	834	9	0.0107914	1	PER1=9aa(261-269)	Family-wise	2715.para.2	SLC9A4;SLC9A2;SLC9A1;SLC9A5;SLC9A3	NO
	SLC9A4	ENST00000295269.4	CCDS33264.1	798	9	0.0112782	1	PER1=9aa(277-285)	Family-wise	2715.para.2	SLC9A4;SLC9A2;SLC9A1;SLC9A5;SLC9A3	NO
	SLC9A5	ENST00000299798.11	CCDS42178.1	896	9	0.0100446	1	PER1=9aa(254-262)	Family-wise	2715.para.2	SLC9A4;SLC9A2;SLC9A1;SLC9A5;SLC9A3	NO
	SLCO1A2	ENST00000307378.6	CCDS8686.1	670	9	0.0134328	1	PER1=9aa(548-556)	Family-wise	1789.para.1	SLCO2B1;SLCO2A1;SLCO3A1;SLCO4A1;SLCO4C1;SLCO6A1;SLCO5A1;SLCO1B1;SLCO1B3;SLCO1B7;SLCO1C1;SLCO1A2	NO
	SLCO1B1	ENST00000256958.2	CCDS8685.1	691	9	0.0130246	1	PER1=9aa(572-580)	Family-wise	1789.para.1	SLCO2B1;SLCO2A1;SLCO3A1;SLCO4A1;SLCO4C1;SLCO6A1;SLCO5A1;SLCO1B1;SLCO1B3;SLCO1B7;SLCO1C1;SLCO1A2	NO
	SLCO1B3	ENST00000381545.3	CCDS8684.1	702	9	0.0128205	1	PER1=9aa(572-580)	Family-wise	1789.para.1	SLCO2B1;SLCO2A1;SLCO3A1;SLCO4A1;SLCO4C1;SLCO6A1;SLCO5A1;SLCO1B1;SLCO1B3;SLCO1B7;SLCO1C1;SLCO1A2	NO
	SLCO1B7	ENST00000421593.2	CCDS44843.1	640	9	0.0140625	1	PER1=9aa(525-533)	Family-wise	1789.para.1	SLCO2B1;SLCO2A1;SLCO3A1;SLCO4A1;SLCO4C1;SLCO6A1;SLCO5A1;SLCO1B1;SLCO1B3;SLCO1B7;SLCO1C1;SLCO1A2	NO
	SLCO1C1	ENST00000381552.1	CCDS53757.1	730	9	0.0123288	1	PER1=9aa(589-597)	Family-wise	1789.para.1	SLCO2B1;SLCO2A1;SLCO3A1;SLCO4A1;SLCO4C1;SLCO6A1;SLCO5A1;SLCO1B1;SLCO1B3;SLCO1B7;SLCO1C1;SLCO1A2	NO
	SLCO2A1	ENST00000310926.4	CCDS3084.1	643	9	0.0139969	1	PER1=9aa(553-561)	Family-wise	1789.para.1	SLCO2B1;SLCO2A1;SLCO3A1;SLCO4A1;SLCO4C1;SLCO6A1;SLCO5A1;SLCO1B1;SLCO1B3;SLCO1B7;SLCO1C1;SLCO1A2	NO
	SLCO2B1	ENST00000289575.5	CCDS8235.1	709	9	0.0126939	1	PER1=9aa(599-607)	Family-wise	1789.para.1	SLCO2B1;SLCO2A1;SLCO3A1;SLCO4A1;SLCO4C1;SLCO6A1;SLCO5A1;SLCO1B1;SLCO1B3;SLCO1B7;SLCO1C1;SLCO1A2	NO
	SLCO3A1	ENST00000318445.6	CCDS10371.1	710	9	0.0126761	1	PER1=9aa(574-582)	Family-wise	1789.para.1	SLCO2B1;SLCO2A1;SLCO3A1;SLCO4A1;SLCO4C1;SLCO6A1;SLCO5A1;SLCO1B1;SLCO1B3;SLCO1B7;SLCO1C1;SLCO1A2	NO
	SLCO4A1	ENST00000217159.1	CCDS13501.1	722	9	0.0124654	1	PER1=9aa(615-623)	Family-wise	1789.para.1	SLCO2B1;SLCO2A1;SLCO3A1;SLCO4A1;SLCO4C1;SLCO6A1;SLCO5A1;SLCO1B1;SLCO1B3;SLCO1B7;SLCO1C1;SLCO1A2	NO
	SLCO4C1	ENST00000310954.6	CCDS34205.1	724	9	0.0124309	1	PER1=9aa(615-623)	Family-wise	1789.para.1	SLCO2B1;SLCO2A1;SLCO3A1;SLCO4A1;SLCO4C1;SLCO6A1;SLCO5A1;SLCO1B1;SLCO1B3;SLCO1B7;SLCO1C1;SLCO1A2	NO
	SLCO5A1	ENST00000260126.4	CCDS6205.1	848	9	0.0106132	1	PER1=9aa(686-694)	Family-wise	1789.para.1	SLCO2B1;SLCO2A1;SLCO3A1;SLCO4A1;SLCO4C1;SLCO6A1;SLCO5A1;SLCO1B1;SLCO1B3;SLCO1B7;SLCO1C1;SLCO1A2	NO
	SLCO6A1	ENST00000506729.1	CCDS34206.1	719	9	0.0125174	1	PER1=9aa(616-624)	Family-wise	1789.para.1	SLCO2B1;SLCO2A1;SLCO3A1;SLCO4A1;SLCO4C1;SLCO6A1;SLCO5A1;SLCO1B1;SLCO1B3;SLCO1B7;SLCO1C1;SLCO1A2	NO
	SLFN11	ENST00000394566.1	CCDS11294.1	901	14	0.0155383	1	PER1=14aa(215-228)	Family-wise	726.para.1	SLFN11;SLFN13;SLFN5;SLFN14	NO
	SLFN13	ENST00000285013.6	CCDS32620.1	897	14	0.0156076	1	PER1=14aa(214-227)	Family-wise	726.para.1	SLFN11;SLFN13;SLFN5;SLFN14	NO
	SLFN5	ENST00000299977.4	CCDS32619.1	891	13	0.0145903	1	PER1=13aa(197-209)	Family-wise	726.para.1	SLFN11;SLFN13;SLFN5;SLFN14	NO
	SMARCA4	ENST00000429416.3	CCDS12253.1	1647	64	0.0388585	6	PER1=9aa(780-788),PER2=9aa(810-818),PER3=9aa(880-888),PER4=9aa(975-983),PER5=9aa(1155-1163),PER6=19aa(1175-1193)	Family-wise	2770.para.1	SMARCA2;SMARCA4	NO
	SMARCC1	ENST00000254480.5	CCDS2758.1	1105	9	0.0081448	1	PER1=9aa(627-635)	Family-wise	3368.para.1	SMARCC2;SMARCC1	NO
	SMTN	ENST00000358743.1	CCDS74845.1	1002	9	0.00898204	1	PER1=9aa(372-380)	Family-wise	1327.para.2	SPECC1;SPECC1L;SMTN	NO
	SMU1	ENST00000397149.3	CCDS6534.1	513	7	0.0136452	1	PER1=7aa(279-285)	Family-wise	359.para.1	WDR5B;WDR5;PAFAH1B1;DAW1;SNRNP40;POC1A;POC1B;PRPF4;WDR38;WDR61;SMU1	NO
	SNCA	ENST00000394986.1	CCDS3634.1	140	9	0.0642857	1	PER1=9aa(46-54)	Family-wise	172.para.1	SNCA;SNCB;SNCG	NO
	SNCB	ENST00000310112.3	CCDS4406.1	134	9	0.0671642	1	PER1=9aa(46-54)	Family-wise	172.para.1	SNCA;SNCB;SNCG	NO
	SNCG	ENST00000372017.3	CCDS7380.1	127	9	0.0708661	1	PER1=9aa(46-54)	Family-wise	172.para.1	SNCA;SNCB;SNCG	NO
	SNRNP40	ENST00000263694.4	CCDS340.1	357	7	0.0196078	1	PER1=7aa(124-130)	Family-wise	359.para.1	WDR5B;WDR5;PAFAH1B1;DAW1;SNRNP40;POC1A;POC1B;PRPF4;WDR38;WDR61;SMU1	NO
	SNRPB2	ENST00000246071.6	CCDS13123.1	225	14	0.0622222	1	PER1=14aa(23-36)	Family-wise	1551.para.1	SNRPB2;SNRPA	NO
	SOS1	ENST00000426016.1	CCDS1802.1	1333	9	0.00675169	1	PER1=9aa(431-439)	Family-wise	3480.para.5	SOS1;SOS2	NO
	SOS2	ENST00000216373.5	CCDS9697.1	1332	9	0.00675676	1	PER1=9aa(429-437)	Family-wise	3480.para.5	SOS1;SOS2	NO
	SOX1	#N/A	CCDS9523.1	391	72	0.184143	3	PER1=24aa(47-70),PER2=14aa(77-90),PER3=34aa(92-125)	Family-wise	2099.para.1	SOX7;SOX17;SOX10;SOX9;SOX8;SOX11;SOX4;SOX1	NO
	SOX11	ENST00000322002.3	CCDS1654.1	441	72	0.163265	3	PER1=24aa(45-68),PER2=14aa(75-88),PER3=34aa(90-123)	Family-wise	2099.para.1	SOX7;SOX17;SOX10;SOX9;SOX8;SOX11;SOX4;SOX1	NO
	SOX17	ENST00000297316.4	CCDS6159.1	414	71	0.171498	3	PER1=23aa(65-87),PER2=14aa(94-107),PER3=34aa(109-142)	Family-wise	2099.para.1	SOX7;SOX17;SOX10;SOX9;SOX8;SOX11;SOX4;SOX1	NO
	SOX4	ENST00000244745.1	CCDS4547.1	474	72	0.151899	3	PER1=24aa(55-78),PER2=14aa(85-98),PER3=34aa(100-133)	Family-wise	2099.para.1	SOX7;SOX17;SOX10;SOX9;SOX8;SOX11;SOX4;SOX1	NO
	SOX7	ENST00000304501.1	CCDS5977.1	388	69	0.177835	3	PER1=21aa(44-64),PER2=14aa(71-84),PER3=34aa(86-119)	Family-wise	2099.para.1	SOX7;SOX17;SOX10;SOX9;SOX8;SOX11;SOX4;SOX1	NO
	SOX8	ENST00000293894.3	CCDS10428.1	446	71	0.159193	3	PER1=23aa(99-121),PER2=14aa(128-141),PER3=34aa(143-176)	Family-wise	2099.para.1	SOX7;SOX17;SOX10;SOX9;SOX8;SOX11;SOX4;SOX1	NO
	SPECC1	ENST00000261503.5	CCDS32590.1	1068	9	0.00842697	1	PER1=9aa(389-397)	Family-wise	1327.para.2	SPECC1;SPECC1L;SMTN	NO
	SPTAN1	ENST00000372739.3	CCDS48036.1	2477	18	0.00726686	2	PER1=9aa(35-43),PER2=9aa(2218-2226)	Family-wise	2459.para.2	SPTA1;SPTAN1;SPTBN1;SPTBN2;SPTB;SPTBN4	NO
	SPTB	ENST00000389722.3	CCDS32099.1	2328	18	0.00773196	2	PER1=9aa(34-42),PER2=9aa(2017-2025)	Family-wise	2459.para.2	SPTA1;SPTAN1;SPTBN1;SPTBN2;SPTB;SPTBN4	NO
	SPTBN1	ENST00000356805.4	CCDS33198.1	2364	18	0.00761421	2	PER1=9aa(34-42),PER2=9aa(2025-2033)	Family-wise	2459.para.2	SPTA1;SPTAN1;SPTBN1;SPTBN2;SPTB;SPTBN4	NO
	SPTBN2	ENST00000533211.1	CCDS8150.1	2390	18	0.00753138	2	PER1=9aa(37-45),PER2=9aa(2021-2029)	Family-wise	2459.para.2	SPTA1;SPTAN1;SPTBN1;SPTBN2;SPTB;SPTBN4	NO
	SPTBN4	#N/A	CCDS12559.1	2564	18	0.00702028	2	PER1=9aa(41-49),PER2=9aa(2056-2064)	Family-wise	2459.para.2	SPTA1;SPTAN1;SPTBN1;SPTBN2;SPTB;SPTBN4	NO
	SPTLC3	ENST00000399002.2	CCDS13115.2	552	9	0.0163043	1	PER1=9aa(370-378)	Family-wise	1958.para.1	SPTLC3;SPTLC2	NO
	STAG1	ENST00000383202.2	CCDS3090.1	1258	9	0.00715421	1	PER1=9aa(213-221)	Family-wise	3427.para.1	STAG2;STAG1;STAG3	NO
	STAG2	ENST00000218089.9	CCDS43990.1	1268	9	0.00709779	1	PER1=9aa(210-218)	Family-wise	3427.para.1	STAG2;STAG1;STAG3	NO
	STAG3	ENST00000426455.1	CCDS75642.1	1226	9	0.00734095	1	PER1=9aa(226-234)	Family-wise	3427.para.1	STAG2;STAG1;STAG3	NO
	STAT1	ENST00000361099.3	CCDS2309.1	750	48	0.064	5	PER1=7aa(384-390),PER2=14aa(457-470),PER3=9aa(610-618),PER4=9aa(630-638),PER5=9aa(702-710)	Family-wise	3006.para.1	STAT5A;STAT5B;STAT6;STAT1;STAT4;STAT3;STAT2	NO
	STAT2	ENST00000314128.4	CCDS8917.1	851	48	0.0564042	5	PER1=7aa(380-386),PER2=14aa(455-468),PER3=9aa(608-616),PER4=9aa(627-635),PER5=9aa(691-699)	Family-wise	3006.para.1	STAT5A;STAT5B;STAT6;STAT1;STAT4;STAT3;STAT2	NO
	STAT3	ENST00000264657.5	CCDS32656.1	770	48	0.0623377	5	PER1=7aa(388-394),PER2=14aa(463-476),PER3=9aa(617-625),PER4=9aa(636-644),PER5=9aa(706-714)	Family-wise	3006.para.1	STAT5A;STAT5B;STAT6;STAT1;STAT4;STAT3;STAT2	NO
	STAT4	ENST00000392320.2	CCDS2310.1	748	47	0.0628342	5	PER1=7aa(379-385),PER2=14aa(453-466),PER3=9aa(605-613),PER4=9aa(624-632),PER5=8aa(694-701)	Family-wise	3006.para.1	STAT5A;STAT5B;STAT6;STAT1;STAT4;STAT3;STAT2	NO
	STAT5A	ENST00000345506.4	CCDS11424.1	794	50	0.0629723	5	PER1=9aa(393-401),PER2=14aa(468-481),PER3=9aa(625-633),PER4=9aa(642-650),PER5=9aa(695-703)	Family-wise	3006.para.1	STAT5A;STAT5B;STAT6;STAT1;STAT4;STAT3;STAT2	NO
	STAT5B	ENST00000293328.3	CCDS11423.1	787	50	0.0635324	5	PER1=9aa(393-401),PER2=14aa(468-481),PER3=9aa(625-633),PER4=9aa(642-650),PER5=9aa(700-708)	Family-wise	3006.para.1	STAT5A;STAT5B;STAT6;STAT1;STAT4;STAT3;STAT2	NO
	STAT6	ENST00000300134.3	CCDS8931.1	847	50	0.0590319	5	PER1=9aa(337-345),PER2=14aa(412-425),PER3=9aa(569-577),PER4=9aa(588-596),PER5=9aa(642-650)	Family-wise	3006.para.1	STAT5A;STAT5B;STAT6;STAT1;STAT4;STAT3;STAT2	NO
	STS	ENST00000217961.4	CCDS14127.1	583	99	0.169811	8	PER1=14aa(30-43),PER2=24aa(70-93),PER3=9aa(128-136),PER4=13aa(158-170),PER5=9aa(339-347),PER6=8aa(359-366),PER7=13aa(369-381),PER8=9aa(398-406)	Family-wise	2947.para.1	GALNS;ARSA;ARSG;ARSD;ARSH;ARSE;ARSF;STS;ARSJ;ARSI;ARSB	NO
	SYT5	ENST00000354308.3	CCDS12919.1	386	14	0.0362694	1	PER1=14aa(327-340)	Family-wise	2676.para.1	SYT1;SYT2;SYT5;SYT8	NO
	SYT8	ENST00000381968.3	CCDS7726.2	401	14	0.0349127	1	PER1=14aa(329-342)	Family-wise	2676.para.1	SYT1;SYT2;SYT5;SYT8	NO
	T	ENST00000296946.2	CCDS5290.1	435	56	0.128736	4	PER1=24aa(56-79),PER2=9aa(96-104),PER3=14aa(118-131),PER4=9aa(157-165)	Family-wise	309.para.1	TBX18;TBX22;TBX20;TBX4;TBX5;TBX1;TBX6;T;TBX19	NO
	TACSTD2	ENST00000371225.2	CCDS609.1	323	9	0.0278638	1	PER1=9aa(111-119)	Family-wise	2852.para.1	TACSTD2;EPCAM	NO
	TBL1XR1	ENST00000430069.1	CCDS46961.1	514	14	0.0272374	1	PER1=14aa(322-335)	Family-wise	1232.para.1	TBL1X;TBL1Y;TBL1XR1	NO
	TBL1Y	#N/A	CCDS14779.1	522	14	0.0268199	1	PER1=14aa(332-345)	Family-wise	1232.para.1	TBL1X;TBL1Y;TBL1XR1	NO
	TBR1	ENST00000389554.3	CCDS33310.1	682	9	0.0131965	1	PER1=9aa(384-392)	Family-wise	943.para.1	TBR1;EOMES	NO
	TBX1	ENST00000332710.4	CCDS13767.1	495	56	0.113131	4	PER1=24aa(124-147),PER2=9aa(164-172),PER3=14aa(188-201),PER4=9aa(228-236)	Family-wise	309.para.1	TBX18;TBX22;TBX20;TBX4;TBX5;TBX1;TBX6;T;TBX19	NO
	TBX18	ENST00000369663.5	CCDS34495.1	607	56	0.092257	4	PER1=24aa(153-176),PER2=9aa(193-201),PER3=14aa(217-230),PER4=9aa(257-265)	Family-wise	309.para.1	TBX18;TBX22;TBX20;TBX4;TBX5;TBX1;TBX6;T;TBX19	NO
	TBX19	ENST00000367821.3	CCDS1272.1	448	56	0.125	4	PER1=24aa(55-78),PER2=9aa(95-103),PER3=14aa(117-130),PER4=9aa(156-164)	Family-wise	309.para.1	TBX18;TBX22;TBX20;TBX4;TBX5;TBX1;TBX6;T;TBX19	NO
	TBX20	ENST00000408931.3	CCDS43568.1	447	56	0.12528	4	PER1=24aa(114-137),PER2=9aa(154-162),PER3=14aa(178-191),PER4=9aa(218-226)	Family-wise	309.para.1	TBX18;TBX22;TBX20;TBX4;TBX5;TBX1;TBX6;T;TBX19	NO
	TBX22	ENST00000373294.5	CCDS14445.1	520	56	0.107692	4	PER1=24aa(106-129),PER2=9aa(146-154),PER3=14aa(171-184),PER4=9aa(211-219)	Family-wise	309.para.1	TBX18;TBX22;TBX20;TBX4;TBX5;TBX1;TBX6;T;TBX19	NO
	TBX4	ENST00000240335.1	CCDS11629.1	545	56	0.102752	4	PER1=24aa(81-104),PER2=9aa(121-129),PER3=14aa(143-156),PER4=9aa(183-191)	Family-wise	309.para.1	TBX18;TBX22;TBX20;TBX4;TBX5;TBX1;TBX6;T;TBX19	NO
	TBX5	ENST00000310346.4	CCDS9173.1	518	56	0.108108	4	PER1=24aa(68-91),PER2=9aa(108-116),PER3=14aa(130-143),PER4=9aa(170-178)	Family-wise	309.para.1	TBX18;TBX22;TBX20;TBX4;TBX5;TBX1;TBX6;T;TBX19	NO
	TBX6	ENST00000395224.2	CCDS10670.1	436	56	0.12844	4	PER1=24aa(105-128),PER2=9aa(145-153),PER3=14aa(167-180),PER4=9aa(207-215)	Family-wise	309.para.1	TBX18;TBX22;TBX20;TBX4;TBX5;TBX1;TBX6;T;TBX19	NO
	TCF20	ENST00000359486.3	CCDS14033.1	1960	9	0.00459184	1	PER1=9aa(1706-1714)	Family-wise	3124.para.1	TCF20;RAI1	NO
	TCIRG1	ENST00000265686.3	CCDS8177.1	830	9	0.0108434	1	PER1=9aa(406-414)	Family-wise	2643.para.1	ATP6V0A1;ATP6V0A4;ATP6V0A2;TCIRG1	NO
	TFAP2A	ENST00000379604.2	CCDS4510.1	437	32	0.0732265	3	PER1=9aa(213-221),PER2=9aa(233-241),PER3=14aa(248-261)	Family-wise	1159.para.1	TFAP2A;TFAP2B;TFAP2E;TFAP2C;TFAP2D	NO
	TFAP2B	ENST00000393655.3	CCDS4934.2	460	32	0.0695652	3	PER1=9aa(232-240),PER2=9aa(252-260),PER3=14aa(267-280)	Family-wise	1159.para.1	TFAP2A;TFAP2B;TFAP2E;TFAP2C;TFAP2D	NO
	TFAP2C	ENST00000201031.2	CCDS13454.1	450	32	0.0711111	3	PER1=9aa(226-234),PER2=9aa(246-254),PER3=14aa(261-274)	Family-wise	1159.para.1	TFAP2A;TFAP2B;TFAP2E;TFAP2C;TFAP2D	NO
	TFAP2D	ENST00000008391.3	CCDS4933.1	452	32	0.0707965	3	PER1=9aa(213-221),PER2=9aa(233-241),PER3=14aa(248-261)	Family-wise	1159.para.1	TFAP2A;TFAP2B;TFAP2E;TFAP2C;TFAP2D	NO
	TFAP2E	ENST00000373235.3	CCDS393.2	442	32	0.0723982	3	PER1=9aa(220-228),PER2=9aa(240-248),PER3=14aa(255-268)	Family-wise	1159.para.1	TFAP2A;TFAP2B;TFAP2E;TFAP2C;TFAP2D	NO
	TGFBR1	ENST00000374994.4	CCDS78413.1	507	41	0.0808679	4	PER1=9aa(203-211),PER2=14aa(332-345),PER3=9aa(379-387),PER4=9aa(403-411)	Family-wise	661.para.1	ACVR2B;ACVR2A;TGFBR2;ACVR1B;TGFBR1;ACVR1C;BMPR1B;BMPR1A;ACVRL1;ACVR1;AMHR2	NO
	TGFBR2	ENST00000359013.4	CCDS33727.1	592	41	0.0692568	4	PER1=9aa(263-271),PER2=14aa(399-412),PER3=9aa(446-454),PER4=9aa(470-478)	Family-wise	661.para.1	ACVR2B;ACVR2A;TGFBR2;ACVR1B;TGFBR1;ACVR1C;BMPR1B;BMPR1A;ACVRL1;ACVR1;AMHR2	NO
	TGM1	ENST00000206765.6	CCDS9622.1	817	27	0.0330477	3	PER1=9aa(284-292),PER2=9aa(381-389),PER3=9aa(431-439)	Family-wise	1294.para.1	TGM1;F13A1;TGM4;TGM7;TGM5;TGM6;TGM3;TGM2;EPB42	NO
	TGM3	ENST00000381458.5	CCDS33435.1	693	27	0.038961	3	PER1=9aa(172-180),PER2=9aa(277-285),PER3=9aa(326-334)	Family-wise	1294.para.1	TGM1;F13A1;TGM4;TGM7;TGM5;TGM6;TGM3;TGM2;EPB42	NO
	TGM4	ENST00000296125.4	CCDS2723.1	684	27	0.0394737	3	PER1=9aa(175-183),PER2=9aa(272-280),PER3=9aa(322-330)	Family-wise	1294.para.1	TGM1;F13A1;TGM4;TGM7;TGM5;TGM6;TGM3;TGM2;EPB42	NO
	TGM5	ENST00000220420.5	CCDS32212.1	720	27	0.0375	3	PER1=9aa(177-185),PER2=9aa(282-290),PER3=9aa(332-340)	Family-wise	1294.para.1	TGM1;F13A1;TGM4;TGM7;TGM5;TGM6;TGM3;TGM2;EPB42	NO
	TGM6	ENST00000202625.2	CCDS13025.1	706	27	0.0382436	3	PER1=9aa(173-181),PER2=9aa(278-286),PER3=9aa(328-336)	Family-wise	1294.para.1	TGM1;F13A1;TGM4;TGM7;TGM5;TGM6;TGM3;TGM2;EPB42	NO
	TGM7	ENST00000452443.2	CCDS32213.1	710	27	0.0380282	3	PER1=9aa(178-186),PER2=9aa(283-291),PER3=9aa(333-341)	Family-wise	1294.para.1	TGM1;F13A1;TGM4;TGM7;TGM5;TGM6;TGM3;TGM2;EPB42	NO
	TMTC1	ENST00000539277.1	CCDS53772.1	882	9	0.0102041	1	PER1=9aa(86-94)	Family-wise	1444.para.1	TMTC1;TMTC3	NO
	TMTC3	ENST00000266712.6	CCDS9032.1	914	9	0.00984683	1	PER1=9aa(64-72)	Family-wise	1444.para.1	TMTC1;TMTC3	NO
	TNFRSF1A	ENST00000162749.2	CCDS8542.1	455	9	0.0197802	1	PER1=9aa(61-69)	Family-wise	605.para.1	TNFRSF25;TNFRSF1A	NO
	TNFRSF25	ENST00000377782.3	CCDS72.1	426	9	0.0211268	1	PER1=9aa(50-58)	Family-wise	605.para.1	TNFRSF25;TNFRSF1A	NO
	TNNC1	ENST00000232975.3	CCDS2857.1	161	33	0.204969	2	PER1=14aa(101-114),PER2=19aa(135-153)	Family-wise	3213.para.1	CALM2;CALM1;CALM3;CALML3;CALML5;TNNC2;TNNC1;CALML4;CABP2;CABP5;CABP4;CALML6	NO
	TNNC2	ENST00000372555.3	CCDS13375.1	160	33	0.20625	2	PER1=14aa(100-113),PER2=19aa(134-152)	Family-wise	3213.para.1	CALM2;CALM1;CALM3;CALML3;CALML5;TNNC2;TNNC1;CALML4;CABP2;CABP5;CABP4;CALML6	NO
	TNNI1	ENST00000361379.4	CCDS1411.1	187	14	0.0748663	1	PER1=14aa(159-172)	Family-wise	861.para.1	TNNI1;TNNI3;TNNI2	NO
	TNNI3	ENST00000344887.5	CCDS42628.1	210	14	0.0666667	1	PER1=14aa(189-202)	Family-wise	861.para.1	TNNI1;TNNI3;TNNI2	NO
	TNNT1	ENST00000588981.1	CCDS12917.1	278	9	0.0323741	1	PER1=9aa(51-59)	Family-wise	2927.para.1	TNNT3;TNNT1;TNNT2	NO
	TNNT2	ENST00000509001.1	CCDS73003.1	298	9	0.0302013	1	PER1=9aa(85-93)	Family-wise	2927.para.1	TNNT3;TNNT1;TNNT2	NO
	TNNT3	ENST00000278317.6	CCDS7727.1	258	9	0.0348837	1	PER1=9aa(44-52)	Family-wise	2927.para.1	TNNT3;TNNT1;TNNT2	NO
	TP73	ENST00000378295.4	CCDS49.1	636	23	0.0361635	2	PER1=9aa(254-262),PER2=14aa(294-307)	Family-wise	664.para.1	TP63;TP73	NO
	TRIM36	ENST00000282369.3	CCDS4115.1	728	9	0.0123626	1	PER1=9aa(182-190)	Family-wise	2028.para.3	TRIM67;TRIM9;MID1;MID2;TRIM46;TRIM36	NO
	TRIM46	ENST00000334634.4	CCDS1097.1	759	9	0.0118577	1	PER1=9aa(197-205)	Family-wise	2028.para.3	TRIM67;TRIM9;MID1;MID2;TRIM46;TRIM36	NO
	TRIM67	ENST00000366653.5	CCDS44333.1	783	9	0.0114943	1	PER1=9aa(234-242)	Family-wise	2028.para.3	TRIM67;TRIM9;MID1;MID2;TRIM46;TRIM36	NO
	TRIM9	ENST00000298355.3	CCDS9703.1	710	9	0.0126761	1	PER1=9aa(193-201)	Family-wise	2028.para.3	TRIM67;TRIM9;MID1;MID2;TRIM46;TRIM36	NO
	TRPC1	ENST00000476941.1	CCDS58856.1	793	9	0.0113493	1	PER1=9aa(766-774)	Family-wise	573.para.2	TRPC3;TRPC7;TRPC6;TRPC1	NO
	TRPC3	ENST00000379645.3	CCDS47130.1	921	9	0.00977199	1	PER1=9aa(882-890)	Family-wise	573.para.2	TRPC3;TRPC7;TRPC6;TRPC1	NO
	TRPC6	ENST00000344327.3	CCDS8311.1	931	9	0.00966702	1	PER1=9aa(889-897)	Family-wise	573.para.2	TRPC3;TRPC7;TRPC6;TRPC1	NO
	TRPC7	ENST00000513104.1	CCDS47267.2	862	9	0.0104408	1	PER1=9aa(814-822)	Family-wise	573.para.2	TRPC3;TRPC7;TRPC6;TRPC1	NO
	TRPM1	ENST00000542188.1	CCDS58347.1	1642	9	0.00548112	1	PER1=9aa(1097-1105)	Family-wise	1492.para.1	TRPM6;TRPM7;TRPM3;TRPM1;TRPM2	NO
	TRPM2	ENST00000397928.1	CCDS13710.1	1503	9	0.00598802	1	PER1=9aa(1031-1039)	Family-wise	1492.para.1	TRPM6;TRPM7;TRPM3;TRPM1;TRPM2	NO
	TRPM3	ENST00000377110.3	CCDS43835.1	1707	9	0.00527241	1	PER1=9aa(1095-1103)	Family-wise	1492.para.1	TRPM6;TRPM7;TRPM3;TRPM1;TRPM2	NO
	TRPM6	ENST00000360774.1	CCDS6647.1	2022	9	0.00445104	1	PER1=9aa(1052-1060)	Family-wise	1492.para.1	TRPM6;TRPM7;TRPM3;TRPM1;TRPM2	NO
	TRPM7	ENST00000313478.7	CCDS42035.1	1865	9	0.00482574	1	PER1=9aa(1079-1087)	Family-wise	1492.para.1	TRPM6;TRPM7;TRPM3;TRPM1;TRPM2	NO
	TRPV1	ENST00000571088.1	CCDS45576.1	839	18	0.0214541	2	PER1=9aa(555-563),PER2=9aa(575-583)	Family-wise	2777.para.1	TRPV2;TRPV1;TRPV4;TRPV3	NO
	TRPV2	ENST00000338560.7	CCDS32576.1	764	18	0.0235602	2	PER1=9aa(513-521),PER2=9aa(533-541)	Family-wise	2777.para.1	TRPV2;TRPV1;TRPV4;TRPV3	NO
	TRPV3	ENST00000301365.4	CCDS58500.1	791	18	0.022756	2	PER1=9aa(565-573),PER2=9aa(585-593)	Family-wise	2777.para.1	TRPV2;TRPV1;TRPV4;TRPV3	NO
	TRPV4	ENST00000418703.2	CCDS9134.1	871	18	0.0206659	2	PER1=9aa(592-600),PER2=9aa(612-620)	Family-wise	2777.para.1	TRPV2;TRPV1;TRPV4;TRPV3	NO
	TSHR	ENST00000541158.2	CCDS9872.1	764	19	0.0248691	1	PER1=19aa(618-636)	Family-wise	1055.para.1	LHCGR;FSHR;TSHR	NO
	TUBB	ENST00000327892.8	CCDS4687.1	444	41	0.0923423	4	PER1=9aa(173-181),PER2=14aa(237-250),PER3=9aa(347-355),PER4=9aa(387-395)	Family-wise	3026.para.1	TUBB4B;TUBB4A;TUBB;TUBB2A;TUBB2B;TUBB3;TUBB6;TUBB8;TUBB1;TUBE1	NO
	TUBB1	ENST00000217133.1	CCDS13475.1	451	41	0.0909091	4	PER1=9aa(173-181),PER2=14aa(237-250),PER3=9aa(347-355),PER4=9aa(387-395)	Family-wise	3026.para.1	TUBB4B;TUBB4A;TUBB;TUBB2A;TUBB2B;TUBB3;TUBB6;TUBB8;TUBB1;TUBE1	NO
	TUBB2A	#N/A	CCDS4484.1	445	41	0.0921348	4	PER1=9aa(173-181),PER2=14aa(237-250),PER3=9aa(347-355),PER4=9aa(387-395)	Family-wise	3026.para.1	TUBB4B;TUBB4A;TUBB;TUBB2A;TUBB2B;TUBB3;TUBB6;TUBB8;TUBB1;TUBE1	NO
	TUBB2B	#N/A	CCDS4485.1	445	41	0.0921348	4	PER1=9aa(173-181),PER2=14aa(237-250),PER3=9aa(347-355),PER4=9aa(387-395)	Family-wise	3026.para.1	TUBB4B;TUBB4A;TUBB;TUBB2A;TUBB2B;TUBB3;TUBB6;TUBB8;TUBB1;TUBE1	NO
	TUBB3	ENST00000315491.7	CCDS10988.1	450	41	0.0911111	4	PER1=9aa(173-181),PER2=14aa(237-250),PER3=9aa(347-355),PER4=9aa(387-395)	Family-wise	3026.para.1	TUBB4B;TUBB4A;TUBB;TUBB2A;TUBB2B;TUBB3;TUBB6;TUBB8;TUBB1;TUBE1	NO
	TUBB4A	ENST00000264071.2	CCDS12168.1	444	41	0.0923423	4	PER1=9aa(173-181),PER2=14aa(237-250),PER3=9aa(347-355),PER4=9aa(387-395)	Family-wise	3026.para.1	TUBB4B;TUBB4A;TUBB;TUBB2A;TUBB2B;TUBB3;TUBB6;TUBB8;TUBB1;TUBE1	NO
	TUBB4B	ENST00000340384.4	CCDS7039.1	445	41	0.0921348	4	PER1=9aa(173-181),PER2=14aa(237-250),PER3=9aa(347-355),PER4=9aa(387-395)	Family-wise	3026.para.1	TUBB4B;TUBB4A;TUBB;TUBB2A;TUBB2B;TUBB3;TUBB6;TUBB8;TUBB1;TUBE1	NO
	TUBB6	ENST00000317702.5	CCDS11858.1	446	41	0.0919283	4	PER1=9aa(173-181),PER2=14aa(237-250),PER3=9aa(347-355),PER4=9aa(387-395)	Family-wise	3026.para.1	TUBB4B;TUBB4A;TUBB;TUBB2A;TUBB2B;TUBB3;TUBB6;TUBB8;TUBB1;TUBE1	NO
	TUBB8	ENST00000309812.4	CCDS7051.1	444	41	0.0923423	4	PER1=9aa(173-181),PER2=14aa(237-250),PER3=9aa(347-355),PER4=9aa(387-395)	Family-wise	3026.para.1	TUBB4B;TUBB4A;TUBB;TUBB2A;TUBB2B;TUBB3;TUBB6;TUBB8;TUBB1;TUBE1	NO
	TUBE1	ENST00000368662.5	CCDS5100.1	475	40	0.0842105	4	PER1=8aa(181-188),PER2=14aa(270-283),PER3=9aa(378-386),PER4=9aa(418-426)	Family-wise	3026.para.1	TUBB4B;TUBB4A;TUBB;TUBB2A;TUBB2B;TUBB3;TUBB6;TUBB8;TUBB1;TUBE1	NO
	TYK2	ENST00000525621.1	CCDS12236.1	1187	14	0.0117944	1	PER1=14aa(667-680)	Family-wise	682.para.2	JAK1;TYK2;JAK3;JAK2;PTK2B;PTK2	NO
	UBR2	ENST00000372899.1	CCDS4870.1	1755	6	0.0034188	1	PER1=6aa(1433-1438)	Family-wise	798.para.1	UBR1;UBR2;UBR3	NO
	UBR3	ENST00000418381.1	CCDS2238.2	1888	3	0.00158898	1	PER1=3aa(1557-1559)	Family-wise	798.para.1	UBR1;UBR2;UBR3	NO
	USH1C	ENST00000005226.7	CCDS7825.1	899	9	0.0100111	1	PER1=9aa(103-111)	Family-wise	1633.para.1	USH1C;PDZD7	NO
	UTRN	ENST00000367545.3	CCDS34547.1	3433	23	0.00669968	2	PER1=9aa(66-74),PER2=14aa(176-189)	Family-wise	1876.para.1	DMD;UTRN	NO
	VAMP1	ENST00000396308.3	CCDS41740.1	118	9	0.0762712	1	PER1=9aa(76-84)	Family-wise	1582.para.1	VAMP1;VAMP2;VAMP3;VAMP4;VAMP8	NO
	VAMP3	ENST00000054666.6	CCDS88.1	100	9	0.09	1	PER1=9aa(57-65)	Family-wise	1582.para.1	VAMP1;VAMP2;VAMP3;VAMP4;VAMP8	NO
	VAMP4	ENST00000236192.7	CCDS1298.1	141	9	0.0638298	1	PER1=9aa(95-103)	Family-wise	1582.para.1	VAMP1;VAMP2;VAMP3;VAMP4;VAMP8	NO
	VAMP8	ENST00000263864.5	CCDS1979.1	100	9	0.09	1	PER1=9aa(55-63)	Family-wise	1582.para.1	VAMP1;VAMP2;VAMP3;VAMP4;VAMP8	NO
	VDR	ENST00000550325.1	CCDS55820.1	477	74	0.155136	4	PER1=14aa(277-290),PER2=19aa(312-330),PER3=32aa(332-363),PER4=9aa(466-474)	Family-wise	2681.para.1	NR1H3;NR1H2;NR1H4;RARB;RARA;RARG;THRB;NR1D2;NR1D1;PPARA;PPARD;PPARG;NR1I2;VDR;RORA	NO
	VIM	ENST00000544301.1	CCDS7120.1	466	47	0.100858	3	PER1=24aa(99-122),PER2=14aa(388-401),PER3=9aa(403-411)	Family-wise	116.para.2	VIM;DES;PRPH;GFAP;INA;NEFL	NO
	WAS	ENST00000376701.4	CCDS14303.1	502	9	0.0179283	1	PER1=9aa(41-49)	Family-wise	2184.para.1	WAS;WASL	NO
	WASL	ENST00000223023.4	CCDS34743.1	505	9	0.0178218	1	PER1=9aa(36-44)	Family-wise	2184.para.1	WAS;WASL	NO
	WDR38	ENST00000373574.1	CCDS75898.1	315	7	0.0222222	1	PER1=7aa(78-84)	Family-wise	359.para.1	WDR5B;WDR5;PAFAH1B1;DAW1;SNRNP40;POC1A;POC1B;PRPF4;WDR38;WDR61;SMU1	NO
	WDR5	ENST00000358625.3	CCDS6981.1	334	7	0.0209581	1	PER1=7aa(102-108)	Family-wise	359.para.1	WDR5B;WDR5;PAFAH1B1;DAW1;SNRNP40;POC1A;POC1B;PRPF4;WDR38;WDR61;SMU1	NO
	WDR5B	ENST00000330689.4	CCDS3012.1	330	7	0.0212121	1	PER1=7aa(98-104)	Family-wise	359.para.1	WDR5B;WDR5;PAFAH1B1;DAW1;SNRNP40;POC1A;POC1B;PRPF4;WDR38;WDR61;SMU1	NO
	WDR61	ENST00000267973.2	CCDS10300.1	305	7	0.0229508	1	PER1=7aa(79-85)	Family-wise	359.para.1	WDR5B;WDR5;PAFAH1B1;DAW1;SNRNP40;POC1A;POC1B;PRPF4;WDR38;WDR61;SMU1	NO
	WNT1	ENST00000293549.3	CCDS8776.1	370	14	0.0378378	1	PER1=14aa(123-136)	Family-wise	1302.para.1	WNT3;WNT3A;WNT4;WNT2B;WNT2;WNT7B;WNT7A;WNT5A;WNT5B;WNT16;WNT1;WNT6;WNT11	NO
	WNT11	ENST00000322563.3	CCDS8242.1	354	14	0.039548	1	PER1=14aa(110-123)	Family-wise	1302.para.1	WNT3;WNT3A;WNT4;WNT2B;WNT2;WNT7B;WNT7A;WNT5A;WNT5B;WNT16;WNT1;WNT6;WNT11	NO
	WNT16	ENST00000222462.2	CCDS5781.1	365	14	0.0383562	1	PER1=14aa(119-132)	Family-wise	1302.para.1	WNT3;WNT3A;WNT4;WNT2B;WNT2;WNT7B;WNT7A;WNT5A;WNT5B;WNT16;WNT1;WNT6;WNT11	NO
	WNT2	ENST00000265441.3	CCDS5771.1	360	14	0.0388889	1	PER1=14aa(107-120)	Family-wise	1302.para.1	WNT3;WNT3A;WNT4;WNT2B;WNT2;WNT7B;WNT7A;WNT5A;WNT5B;WNT16;WNT1;WNT6;WNT11	NO
	WNT2B	ENST00000369684.4	CCDS847.1	391	14	0.0358056	1	PER1=14aa(138-151)	Family-wise	1302.para.1	WNT3;WNT3A;WNT4;WNT2B;WNT2;WNT7B;WNT7A;WNT5A;WNT5B;WNT16;WNT1;WNT6;WNT11	NO
	WNT3	ENST00000225512.5	CCDS11505.1	355	14	0.0394366	1	PER1=14aa(111-124)	Family-wise	1302.para.1	WNT3;WNT3A;WNT4;WNT2B;WNT2;WNT7B;WNT7A;WNT5A;WNT5B;WNT16;WNT1;WNT6;WNT11	NO
	WNT3A	ENST00000284523.1	CCDS1564.1	352	14	0.0397727	1	PER1=14aa(108-121)	Family-wise	1302.para.1	WNT3;WNT3A;WNT4;WNT2B;WNT2;WNT7B;WNT7A;WNT5A;WNT5B;WNT16;WNT1;WNT6;WNT11	NO
	WNT4	ENST00000290167.6	CCDS223.1	351	14	0.039886	1	PER1=14aa(108-121)	Family-wise	1302.para.1	WNT3;WNT3A;WNT4;WNT2B;WNT2;WNT7B;WNT7A;WNT5A;WNT5B;WNT16;WNT1;WNT6;WNT11	NO
	WNT5A	ENST00000474267.1	CCDS46850.1	380	14	0.0368421	1	PER1=14aa(134-147)	Family-wise	1302.para.1	WNT3;WNT3A;WNT4;WNT2B;WNT2;WNT7B;WNT7A;WNT5A;WNT5B;WNT16;WNT1;WNT6;WNT11	NO
	WNT5B	ENST00000397196.2	CCDS8510.1	359	14	0.0389972	1	PER1=14aa(113-126)	Family-wise	1302.para.1	WNT3;WNT3A;WNT4;WNT2B;WNT2;WNT7B;WNT7A;WNT5A;WNT5B;WNT16;WNT1;WNT6;WNT11	NO
	WNT6	ENST00000233948.3	CCDS2425.1	365	14	0.0383562	1	PER1=14aa(104-117)	Family-wise	1302.para.1	WNT3;WNT3A;WNT4;WNT2B;WNT2;WNT7B;WNT7A;WNT5A;WNT5B;WNT16;WNT1;WNT6;WNT11	NO
	WNT7A	ENST00000285018.4	CCDS2616.1	349	14	0.0401146	1	PER1=14aa(103-116)	Family-wise	1302.para.1	WNT3;WNT3A;WNT4;WNT2B;WNT2;WNT7B;WNT7A;WNT5A;WNT5B;WNT16;WNT1;WNT6;WNT11	NO
	WNT7B	ENST00000339464.4	CCDS33667.1	349	14	0.0401146	1	PER1=14aa(103-116)	Family-wise	1302.para.1	WNT3;WNT3A;WNT4;WNT2B;WNT2;WNT7B;WNT7A;WNT5A;WNT5B;WNT16;WNT1;WNT6;WNT11	NO
	YWHAB	ENST00000372839.3	CCDS13339.1	246	9	0.0365854	1	PER1=9aa(122-130)	Family-wise	1338.para.1	YWHAZ;YWHAB;YWHAQ;YWHAG;YWHAH;SFN;YWHAE	NO
	YWHAE	ENST00000264335.8	CCDS11001.1	255	9	0.0352941	1	PER1=9aa(123-131)	Family-wise	1338.para.1	YWHAZ;YWHAB;YWHAQ;YWHAG;YWHAH;SFN;YWHAE	NO
	YWHAH	ENST00000248975.5	CCDS13901.1	246	9	0.0365854	1	PER1=9aa(125-133)	Family-wise	1338.para.1	YWHAZ;YWHAB;YWHAQ;YWHAG;YWHAH;SFN;YWHAE	NO
	YWHAQ	ENST00000381844.4	CCDS1666.1	245	9	0.0367347	1	PER1=9aa(120-128)	Family-wise	1338.para.1	YWHAZ;YWHAB;YWHAQ;YWHAG;YWHAH;SFN;YWHAE	NO
	YWHAZ	ENST00000395957.2	CCDS6290.1	245	9	0.0367347	1	PER1=9aa(120-128)	Family-wise	1338.para.1	YWHAZ;YWHAB;YWHAQ;YWHAG;YWHAH;SFN;YWHAE	NO
	ZEB1	ENST00000361642.5	CCDS53505.1	1125	9	0.008	1	PER1=9aa(955-963)	Family-wise	3189.para.2	ZEB1;ZEB2	NO
	ZEB2	ENST00000558170.2	CCDS2186.1	1214	9	0.00741351	1	PER1=9aa(1049-1057)	Family-wise	3189.para.2	ZEB1;ZEB2	NO
	ZIC1	ENST00000282928.4	CCDS3136.1	447	18	0.0402685	2	PER1=9aa(340-348),PER2=9aa(370-378)	Family-wise	454.para.2	ZIC2;ZIC1;ZIC3;ZNF410	NO
	ZIC2	#N/A	CCDS9495.1	532	18	0.0338346	2	PER1=9aa(371-379),PER2=9aa(401-409)	Family-wise	454.para.2	ZIC2;ZIC1;ZIC3;ZNF410	NO
	ZIC3	ENST00000287538.5	CCDS14663.1	467	18	0.0385439	2	PER1=9aa(366-374),PER2=9aa(396-404)	Family-wise	454.para.2	ZIC2;ZIC1;ZIC3;ZNF410	NO
	ZMIZ2	ENST00000309315.4	CCDS43576.1	920	9	0.00978261	1	PER1=9aa(160-168)	Family-wise	3077.para.1	ZMIZ1;ZMIZ2	NO
	ZNF410	ENST00000442160.3	CCDS55929.1	516	18	0.0348837	2	PER1=9aa(334-342),PER2=9aa(364-372)	Family-wise	454.para.2	ZIC2;ZIC1;ZIC3;ZNF410	NO
	ZSWIM4	ENST00000254323.2	CCDS32924.1	989	14	0.0141557	1	PER1=14aa(930-943)	Family-wise	2265.para.1	ZSWIM4;ZSWIM6;ZSWIM5	NO
	ZSWIM5	ENST00000359600.5	CCDS41319.1	1185	14	0.0118143	1	PER1=14aa(1126-1139)	Family-wise	2265.para.1	ZSWIM4;ZSWIM6;ZSWIM5	NO

## Sheet: 2) GW PERs summary
	Gene	Transcript	CCDS	Total.aa	Total.aa.in.pers	Per.%.of.gene	Number.of.pers	PERs	Approach	PERs in Family-wise
	ACTN2	ENST00000366578.4	CCDS1613.1	894	9	0.0100671	1	PER1=9aa(111-119)	Gene-wise	YES
	ACVR1	ENST00000263640.3	CCDS2206.1	509	9	0.0176817	1	PER1=9aa(201-209)	Gene-wise	YES
	AFF4	ENST00000265343.5	CCDS4164.1	1163	9	0.00773861	1	PER1=9aa(251-259)	Gene-wise	YES
	APP	ENST00000346798.3	CCDS13576.1	770	23	0.0298701	2	PER1=9aa(686-694),PER2=14aa(711-724)	Gene-wise	YES
	ATAD3A	ENST00000378755.5	CCDS31.1	634	9	0.0141956	1	PER1=9aa(46-54)	Gene-wise	YES
	ATP7A	ENST00000341514.6	CCDS35339.1	1500	18	0.012	2	PER1=9aa(1001-1009),PER2=9aa(1301-1309)	Gene-wise	YES
	BCL11A	ENST00000335712.6	CCDS1862.1	835	9	0.0107784	1	PER1=9aa(46-54)	Gene-wise	YES
	BRAF	ENST00000288602.6	CCDS5863.1	766	9	0.0117493	1	PER1=9aa(591-599)	Gene-wise	YES
	CACNA1E	ENST00000367573.2	CCDS55664.1	2313	9	0.00389105	1	PER1=9aa(696-704)	Gene-wise	YES
	CCND2	ENST00000261254.3	CCDS8524.1	289	9	0.0311419	1	PER1=9aa(276-284)	Gene-wise	YES
	CHD3	ENST00000380358.4	CCDS32553.2	2059	9	0.00437105	1	PER1=9aa(1216-1224)	Gene-wise	YES
	CHN1	ENST00000409900.3	CCDS46455.1	459	14	0.0305011	1	PER1=14aa(216-229)	Gene-wise	YES
	CHRNB1	ENST00000306071.2	CCDS11106.1	501	14	0.0279441	1	PER1=14aa(281-294)	Gene-wise	YES
	CNNM4	ENST00000377075.2	CCDS2024.2	775	9	0.0116129	1	PER1=9aa(491-499)	Gene-wise	YES
	COL10A1	ENST00000327673.4	CCDS5105.1	680	14	0.0205882	1	PER1=14aa(591-604)	Gene-wise	YES
	CREBBP	ENST00000262367.5	CCDS10509.1	2442	9	0.0036855	1	PER1=9aa(1866-1874)	Gene-wise	YES
	CSF1R	ENST00000286301.3	CCDS4302.1	972	18	0.0185185	2	PER1=9aa(776-784),PER2=9aa(821-829)	Gene-wise	YES
	CTNNB1	ENST00000349496.5	CCDS2694.1	781	9	0.0115237	1	PER1=9aa(31-39)	Gene-wise	YES
	DHX30	ENST00000445061.1	CCDS2759.1	1194	9	0.00753769	1	PER1=9aa(781-789)	Gene-wise	YES
	DMD	ENST00000357033.4	CCDS14233.1	3685	9	0.00244233	1	PER1=9aa(161-169)	Gene-wise	YES
	DNAJB6	ENST00000262177.4	CCDS5946.1	326	9	0.0276074	1	PER1=9aa(91-99)	Gene-wise	YES
	EPAS1	ENST00000263734.3	CCDS1825.1	870	19	0.0218391	1	PER1=19aa(526-544)	Gene-wise	YES
	EXT1	ENST00000378204.2	CCDS6324.1	746	9	0.0120643	1	PER1=9aa(336-344)	Gene-wise	YES
	FAM111B	ENST00000343597.3	CCDS7972.1	734	14	0.0190736	1	PER1=14aa(621-634)	Gene-wise	YES
	FAM126A	ENST00000432176.2	CCDS5377.1	521	9	0.0172745	1	PER1=9aa(51-59)	Gene-wise	YES
	FGFR3	ENST00000340107.4	CCDS54706.1	808	9	0.0111386	1	PER1=9aa(261-269)	Gene-wise	YES
	FLI1	ENST00000527786.2	CCDS44768.1	452	9	0.0199115	1	PER1=9aa(336-344)	Gene-wise	YES
	FLNA	ENST00000369850.3	CCDS48194.1	2647	23	0.00868908	2	PER1=14aa(121-134),PER2=9aa(206-214)	Gene-wise	YES
	FLNB	ENST00000490882.1	CCDS54599.1	2633	51	0.0193695	4	PER1=14aa(161-174),PER2=9aa(181-189),PER3=19aa(196-214),PER4=9aa(226-234)	Gene-wise	YES
	FLNC	ENST00000325888.8	CCDS43644.1	2725	9	0.00330275	1	PER1=9aa(2296-2304)	Gene-wise	YES
	FLT3	ENST00000241453.7	CCDS31953.1	993	14	0.0140987	1	PER1=14aa(831-844)	Gene-wise	YES
	FLT4	ENST00000261937.6	CCDS4457.1	1363	36	0.0264123	4	PER1=9aa(851-859),PER2=9aa(1036-1044),PER3=9aa(1051-1059),PER4=9aa(1101-1109)	Gene-wise	YES
	GABRB2	ENST00000274547.2	CCDS4355.1	512	9	0.0175781	1	PER1=9aa(296-304)	Gene-wise	YES
	GAN	ENST00000568107.2	CCDS10935.1	597	9	0.0150754	1	PER1=9aa(46-54)	Gene-wise	YES
	GATA3	ENST00000379328.3	CCDS31143.1	444	14	0.0315315	1	PER1=14aa(281-294)	Gene-wise	YES
	GFAP	ENST00000586793.1	CCDS59296.1	438	9	0.0205479	1	PER1=9aa(76-84)	Gene-wise	YES
	GLDN	ENST00000335449.6	CCDS10140.2	551	9	0.0163339	1	PER1=9aa(471-479)	Gene-wise	YES
	GLRA1	ENST00000455880.2	CCDS54942.1	457	9	0.0196937	1	PER1=9aa(291-299)	Gene-wise	YES
	GLUD1	ENST00000277865.4	CCDS7382.1	558	19	0.0340502	1	PER1=19aa(491-509)	Gene-wise	YES
	GNAI3	ENST00000369851.4	CCDS802.1	354	9	0.0254237	1	PER1=9aa(41-49)	Gene-wise	YES
	GRIA4	ENST00000282499.5	CCDS8333.1	902	14	0.0155211	1	PER1=14aa(636-649)	Gene-wise	YES
	GRIN2A	ENST00000396573.2	CCDS10539.1	1464	14	0.00956284	1	PER1=14aa(641-654)	Gene-wise	YES
	HECW2	ENST00000260983.3	CCDS33354.1	1572	9	0.00572519	1	PER1=9aa(1191-1199)	Gene-wise	YES
	HNRNPA1	ENST00000340913.6	CCDS44909.1	372	14	0.0376344	1	PER1=14aa(326-339)	Gene-wise	YES
	HOXA13	#N/A	CCDS5412.1	388	14	0.0360825	1	PER1=14aa(366-379)	Gene-wise	YES
	HOXB13	ENST00000290295.7	CCDS11536.1	284	9	0.0316901	1	PER1=9aa(126-134)	Gene-wise	YES
	IGSF10	ENST00000282466.3	CCDS3160.1	2623	9	0.00343119	1	PER1=9aa(156-164)	Gene-wise	YES
	ITGB3	ENST00000559488.1	CCDS11511.1	788	9	0.0114213	1	PER1=9aa(141-149)	Gene-wise	YES
	ITPR1	ENST00000302640.8	CCDS54551.1	2743	9	0.00328108	1	PER1=9aa(2576-2584)	Gene-wise	YES
	KCNB1	ENST00000371741.4	CCDS13418.1	858	14	0.016317	1	PER1=14aa(371-384)	Gene-wise	YES
	KCNQ3	ENST00000388996.4	CCDS34943.1	872	9	0.0103211	1	PER1=9aa(306-314)	Gene-wise	YES
	KIF1A	ENST00000498729.2	CCDS58757.1	1791	18	0.0100503	2	PER1=9aa(211-219),PER2=9aa(246-254)	Gene-wise	YES
	KIF2A	ENST00000407818.3	CCDS47216.1	744	9	0.0120968	1	PER1=9aa(316-324)	Gene-wise	YES
	KIF5A	ENST00000455537.2	CCDS8945.1	1032	23	0.0222868	2	PER1=9aa(196-204),PER2=14aa(251-264)	Gene-wise	YES
	KLF1	ENST00000264834.4	CCDS12285.1	362	9	0.0248619	1	PER1=9aa(331-339)	Gene-wise	YES
	KRT1	ENST00000252244.3	CCDS8836.1	644	18	0.0279503	2	PER1=9aa(186-194),PER2=9aa(481-489)	Gene-wise	YES
	KRT10	ENST00000269576.5	CCDS11377.1	584	33	0.0565068	2	PER1=19aa(146-164),PER2=14aa(441-454)	Gene-wise	YES
	KRT12	ENST00000251643.4	CCDS11378.1	494	23	0.0465587	2	PER1=14aa(126-139),PER2=9aa(426-434)	Gene-wise	YES
	KRT13	ENST00000246635.3	CCDS11396.1	458	14	0.0305677	1	PER1=14aa(106-119)	Gene-wise	YES
	KRT14	ENST00000167586.6	CCDS11400.1	472	9	0.0190678	1	PER1=9aa(411-419)	Gene-wise	YES
	KRT16	ENST00000301653.4	CCDS11401.1	473	9	0.0190275	1	PER1=9aa(121-129)	Gene-wise	YES
	KRT17	ENST00000311208.8	CCDS11402.1	432	14	0.0324074	1	PER1=14aa(91-104)	Gene-wise	YES
	KRT2	ENST00000309680.3	CCDS8835.1	639	18	0.028169	2	PER1=9aa(181-189),PER2=9aa(476-484)	Gene-wise	YES
	KRT5	ENST00000252242.4	CCDS8830.1	590	9	0.0152542	1	PER1=9aa(321-329)	Gene-wise	YES
	KRT6A	ENST00000330722.6	CCDS41786.1	564	23	0.0407801	2	PER1=9aa(166-174),PER2=14aa(461-474)	Gene-wise	YES
	KRT6C	ENST00000252250.6	CCDS8829.1	564	9	0.0159574	1	PER1=9aa(466-474)	Gene-wise	YES
	KRT86	ENST00000293525.5	CCDS41785.1	486	14	0.0288066	1	PER1=14aa(401-414)	Gene-wise	YES
	LMX1B	ENST00000355497.5	CCDS55343.1	406	14	0.0344828	1	PER1=14aa(261-274)	Gene-wise	YES
	MAFB	#N/A	CCDS13311.1	323	14	0.0433437	1	PER1=14aa(56-69)	Gene-wise	YES
	MAP2K2	ENST00000262948.5	CCDS12120.1	400	9	0.0225	1	PER1=9aa(56-64)	Gene-wise	YES
	MED13	ENST00000397786.2	CCDS42366.1	2174	9	0.00413983	1	PER1=9aa(2056-2064)	Gene-wise	YES
	MED13L	ENST00000281928.3	CCDS9177.1	2210	14	0.00633484	1	PER1=14aa(861-874)	Gene-wise	YES
	MEF2C	ENST00000340208.5	CCDS54878.1	483	9	0.0186335	1	PER1=9aa(16-24)	Gene-wise	YES
	MEIS2	ENST00000561208.1	CCDS10044.1	477	14	0.0293501	1	PER1=14aa(326-339)	Gene-wise	YES
	MMP13	ENST00000260302.3	CCDS8324.1	471	9	0.0191083	1	PER1=9aa(71-79)	Gene-wise	YES
	MYC	#N/A	CCDS6359.2	454	23	0.0506608	2	PER1=9aa(51-59),PER2=14aa(66-79)	Gene-wise	YES
	NEUROD2	ENST00000302584.4	CCDS11338.1	382	9	0.0235602	1	PER1=9aa(126-134)	Gene-wise	YES
	NFKB2	ENST00000369966.3	CCDS41564.1	900	14	0.0155556	1	PER1=14aa(861-874)	Gene-wise	YES
	NKX2-5	ENST00000329198.4	CCDS4387.1	324	9	0.0277778	1	PER1=9aa(181-189)	Gene-wise	YES
	NLRP3	ENST00000336119.3	CCDS1632.1	1036	23	0.0222008	2	PER1=14aa(301-314),PER2=9aa(566-574)	Gene-wise	YES
	NOD2	ENST00000300589.2	CCDS10746.1	1040	9	0.00865385	1	PER1=9aa(491-499)	Gene-wise	YES
	PACS2	ENST00000458164.2	CCDS45178.2	904	9	0.00995575	1	PER1=9aa(206-214)	Gene-wise	YES
	PAX3	ENST00000392069.2	CCDS2448.1	505	18	0.0356436	2	PER1=9aa(81-89),PER2=9aa(266-274)	Gene-wise	YES
	PAX6	ENST00000419022.1	CCDS31452.1	436	14	0.0321101	1	PER1=14aa(36-49)	Gene-wise	YES
	PAX8	ENST00000429538.3	CCDS46398.1	450	9	0.02	1	PER1=9aa(51-59)	Gene-wise	YES
	PAX9	ENST00000361487.6	CCDS9662.1	341	14	0.0410557	1	PER1=14aa(21-34)	Gene-wise	YES
	PDE3A	ENST00000359062.3	CCDS31754.1	1141	14	0.0122699	1	PER1=14aa(441-454)	Gene-wise	YES
	PDE4D	ENST00000340635.6	CCDS47213.1	809	9	0.0111248	1	PER1=9aa(221-229)	Gene-wise	YES
	PDGFRA	ENST00000257290.5	CCDS3495.1	1089	9	0.00826446	1	PER1=9aa(841-849)	Gene-wise	YES
	PDYN	ENST00000217305.2	CCDS13023.1	254	9	0.0354331	1	PER1=9aa(211-219)	Gene-wise	YES
	PHKA2	ENST00000379942.4	CCDS14190.1	1235	18	0.0145749	2	PER1=9aa(131-139),PER2=9aa(186-194)	Gene-wise	YES
	PPP2R1A	ENST00000322088.6	CCDS12849.1	589	9	0.0152801	1	PER1=9aa(176-184)	Gene-wise	YES
	PPP2R5D	ENST00000485511.1	CCDS4878.1	602	9	0.0149502	1	PER1=9aa(196-204)	Gene-wise	YES
	PTDSS1	ENST00000517309.1	CCDS6271.1	473	9	0.0190275	1	PER1=9aa(261-269)	Gene-wise	YES
	RAC3	ENST00000306897.4	CCDS11798.1	192	9	0.046875	1	PER1=9aa(56-64)	Gene-wise	YES
	RAF1	ENST00000251849.4	CCDS2612.1	648	9	0.0138889	1	PER1=9aa(256-264)	Gene-wise	YES
	RAX	ENST00000334889.3	CCDS11972.1	346	9	0.0260116	1	PER1=9aa(186-194)	Gene-wise	YES
	RBPJ	ENST00000342295.1	CCDS3437.1	500	9	0.018	1	PER1=9aa(61-69)	Gene-wise	YES
	RHBDF2	ENST00000313080.4	CCDS32743.1	856	14	0.0163551	1	PER1=14aa(181-194)	Gene-wise	YES
	RNF13	ENST00000344229.3	CCDS3146.1	381	9	0.023622	1	PER1=9aa(311-319)	Gene-wise	YES
	RP1L1	#N/A	CCDS43708.1	2400	9	0.00375	1	PER1=9aa(1196-1204)	Gene-wise	YES
	RUNX1	ENST00000300305.3	CCDS13639.1	480	14	0.0291667	1	PER1=14aa(191-204)	Gene-wise	YES
	RUNX2	ENST00000371438.1	CCDS43467.2	521	23	0.0441459	2	PER1=14aa(186-199),PER2=9aa(221-229)	Gene-wise	YES
	RYR1	ENST00000359596.3	CCDS33011.1	5038	18	0.00357285	2	PER1=9aa(4856-4864),PER2=9aa(4891-4899)	Gene-wise	YES
	SATB2	ENST00000417098.1	CCDS2327.1	733	9	0.0122783	1	PER1=9aa(386-394)	Gene-wise	YES
	SCNN1B	ENST00000343070.2	CCDS10609.1	640	9	0.0140625	1	PER1=9aa(616-624)	Gene-wise	YES
	SLC4A1	ENST00000262418.6	CCDS11481.1	911	9	0.00987925	1	PER1=9aa(756-764)	Gene-wise	YES
	SLFN14	#N/A	CCDS45650.1	912	9	0.00986842	1	PER1=9aa(216-224)	Gene-wise	YES
	SMARCA2	ENST00000382203.1	CCDS34977.1	1590	14	0.00880503	1	PER1=14aa(1151-1164)	Gene-wise	YES
	SMARCC2	ENST00000267064.4	CCDS8907.1	1214	9	0.00741351	1	PER1=9aa(606-614)	Gene-wise	YES
	SNRNP200	ENST00000323853.5	CCDS2020.1	2136	18	0.00842697	2	PER1=9aa(536-544),PER2=9aa(681-689)	Gene-wise	YES
	SNRPA	ENST00000243563.3	CCDS12565.1	282	14	0.0496454	1	PER1=14aa(26-39)	Gene-wise	YES
	SOX10	ENST00000396884.2	CCDS13964.1	466	9	0.0193133	1	PER1=9aa(106-114)	Gene-wise	YES
	SOX9	ENST00000245479.2	CCDS11689.1	509	14	0.0275049	1	PER1=14aa(106-119)	Gene-wise	YES
	SPAST	ENST00000315285.3	CCDS1778.1	616	9	0.0146104	1	PER1=9aa(361-369)	Gene-wise	YES
	SPECC1L	ENST00000314328.9	CCDS33619.1	1117	9	0.0080573	1	PER1=9aa(411-419)	Gene-wise	YES
	SPTA1	ENST00000368147.4	CCDS41423.1	2419	14	0.00578752	1	PER1=14aa(41-54)	Gene-wise	YES
	SPTLC2	ENST00000216484.2	CCDS9865.1	562	14	0.024911	1	PER1=14aa(376-389)	Gene-wise	YES
	SYT1	ENST00000261205.4	CCDS9017.1	422	14	0.0331754	1	PER1=14aa(361-374)	Gene-wise	YES
	SYT2	ENST00000367267.1	CCDS1427.1	419	9	0.0214797	1	PER1=9aa(306-314)	Gene-wise	YES
	TBL1X	ENST00000217964.7	CCDS14133.1	577	9	0.0155979	1	PER1=9aa(416-424)	Gene-wise	YES
	TGFBI	ENST00000442011.2	CCDS47266.1	683	14	0.0204978	1	PER1=14aa(616-629)	Gene-wise	YES
	TGM2	ENST00000361475.2	CCDS13302.1	687	9	0.0131004	1	PER1=9aa(326-334)	Gene-wise	YES
	THRB	ENST00000396671.2	CCDS2641.1	461	9	0.0195228	1	PER1=9aa(326-334)	Gene-wise	YES
	TNNI2	ENST00000381906.1	CCDS31333.1	182	9	0.0494505	1	PER1=9aa(161-169)	Gene-wise	YES
	TP63	ENST00000264731.3	CCDS3293.1	680	14	0.0205882	1	PER1=14aa(341-354)	Gene-wise	YES
	UBR1	ENST00000290650.4	CCDS10091.1	1749	9	0.0051458	1	PER1=9aa(1426-1434)	Gene-wise	YES
	VAMP2	ENST00000316509.6	CCDS32561.1	116	9	0.0775862	1	PER1=9aa(71-79)	Gene-wise	YES
	YWHAG	ENST00000307630.3	CCDS5584.1	247	9	0.0364372	1	PER1=9aa(126-134)	Gene-wise	YES
	ZMIZ1	ENST00000334512.5	CCDS7357.1	1067	9	0.00843486	1	PER1=9aa(296-304)	Gene-wise	YES
	ZSWIM6	ENST00000252744.5	CCDS47215.1	1215	14	0.0115226	1	PER1=14aa(1156-1169)	Gene-wise	YES
	AIRE	ENST00000291582.5	CCDS13706.1	545	14	0.0256881	1	PER1=14aa(6-19)	Gene-wise	NO
	ALDH1A2	ENST00000249750.4	CCDS10163.1	518	9	0.0173745	1	PER1=9aa(151-159)	Gene-wise	NO
	ANKRD11	ENST00000301030.4	CCDS32513.1	2663	9	0.00337965	1	PER1=9aa(2486-2494)	Gene-wise	NO
	ATN1	ENST00000356654.4	CCDS31734.1	1190	9	0.00756303	1	PER1=9aa(1056-1064)	Gene-wise	NO
	ATOH7	ENST00000373673.3	CCDS7276.1	152	9	0.0592105	1	PER1=9aa(41-49)	Gene-wise	NO
	ATRX	ENST00000373344.5	CCDS14434.1	2492	14	0.00561798	1	PER1=14aa(241-254)	Gene-wise	NO
	AUTS2	ENST00000342771.4	CCDS5539.1	1259	14	0.0111199	1	PER1=14aa(526-539)	Gene-wise	NO
	C4B	#N/A	CCDS47405.1	1744	14	0.00802752	1	PER1=14aa(471-484)	Gene-wise	NO
	CDC73	ENST00000367435.3	CCDS1382.1	531	9	0.0169492	1	PER1=9aa(91-99)	Gene-wise	NO
	CDHR1	ENST00000372117.3	CCDS7372.1	859	9	0.0104773	1	PER1=9aa(126-134)	Gene-wise	NO
	CDKL5	ENST00000379989.3	CCDS14186.1	1030	9	0.00873786	1	PER1=9aa(196-204)	Gene-wise	NO
	CEP120	ENST00000306467.5	CCDS4134.2	986	9	0.00912779	1	PER1=9aa(191-199)	Gene-wise	NO
	CLPP	ENST00000245816.4	CCDS12162.1	277	9	0.032491	1	PER1=9aa(141-149)	Gene-wise	NO
	COCH	ENST00000396618.3	CCDS9640.1	550	9	0.0163636	1	PER1=9aa(116-124)	Gene-wise	NO
	COL6A3	ENST00000295550.4	CCDS33412.1	3177	9	0.00283286	1	PER1=9aa(2071-2079)	Gene-wise	NO
	COPA	ENST00000368069.3	CCDS41424.1	1233	9	0.00729927	1	PER1=9aa(236-244)	Gene-wise	NO
	CUL3	ENST00000264414.4	CCDS2462.1	768	9	0.0117188	1	PER1=9aa(406-414)	Gene-wise	NO
	DCTN1	ENST00000361874.3	CCDS1939.1	1278	9	0.00704225	1	PER1=9aa(66-74)	Gene-wise	NO
	DNAJC21	ENST00000382021.2	CCDS3907.2	576	14	0.0243056	1	PER1=14aa(26-39)	Gene-wise	NO
	DSE	ENST00000331677.3	CCDS5107.1	958	14	0.0146138	1	PER1=14aa(261-274)	Gene-wise	NO
	DSPP	ENST00000399271.1	CCDS43248.1	1301	9	0.00691776	1	PER1=9aa(11-19)	Gene-wise	NO
	EGR2	ENST00000242480.3	CCDS7267.1	476	23	0.0483193	2	PER1=9aa(351-359),PER2=14aa(376-389)	Gene-wise	NO
	EIF2AK3	ENST00000303236.3	CCDS33241.1	1116	18	0.016129	2	PER1=9aa(651-659),PER2=9aa(986-994)	Gene-wise	NO
	ERF	ENST00000222329.4	CCDS12600.1	548	9	0.0164234	1	PER1=9aa(81-89)	Gene-wise	NO
	FGA	ENST00000302053.3	CCDS3787.1	866	14	0.0161663	1	PER1=14aa(26-39)	Gene-wise	NO
	FOXC1	#N/A	CCDS4473.1	553	9	0.0162749	1	PER1=9aa(126-134)	Gene-wise	NO
	FOXC2	#N/A	CCDS10958.1	501	9	0.0179641	1	PER1=9aa(116-124)	Gene-wise	NO
	FOXF1	ENST00000262426.4	CCDS10957.2	379	19	0.0501319	1	PER1=19aa(86-104)	Gene-wise	NO
	FOXL2	#N/A	CCDS3105.1	376	14	0.037234	1	PER1=14aa(96-109)	Gene-wise	NO
	FTO	ENST00000471389.1	CCDS32448.1	505	9	0.0178218	1	PER1=9aa(316-324)	Gene-wise	NO
	GATA6	#N/A	CCDS11872.1	595	9	0.0151261	1	PER1=9aa(466-474)	Gene-wise	NO
	GFER	ENST00000248114.6	CCDS32368.1	205	9	0.0439024	1	PER1=9aa(191-199)	Gene-wise	NO
	HCN4	ENST00000261917.3	CCDS10248.1	1203	9	0.0074813	1	PER1=9aa(476-484)	Gene-wise	NO
	IFNGR1	ENST00000367739.4	CCDS5185.1	489	9	0.0184049	1	PER1=9aa(61-69)	Gene-wise	NO
	IMPAD1	ENST00000262644.4	CCDS6169.1	359	9	0.0250696	1	PER1=9aa(176-184)	Gene-wise	NO
	INF2	ENST00000392634.4	CCDS9989.2	1249	18	0.0144115	2	PER1=9aa(76-84),PER2=9aa(101-109)	Gene-wise	NO
	KAT6A	ENST00000396930.3	CCDS6124.1	2004	14	0.00698603	1	PER1=14aa(1546-1559)	Gene-wise	NO
	KIF22	ENST00000160827.4	CCDS10653.1	665	9	0.0135338	1	PER1=9aa(141-149)	Gene-wise	NO
	KITLG	ENST00000228280.5	CCDS31868.1	273	9	0.032967	1	PER1=9aa(31-39)	Gene-wise	NO
	KMT2A	ENST00000534358.1	CCDS55791.1	3972	32	0.00805639	3	PER1=9aa(1151-1159),PER2=14aa(1181-1194),PER3=9aa(2851-2859)	Gene-wise	NO
	KRT9	ENST00000246662.4	CCDS32654.1	623	14	0.0224719	1	PER1=14aa(156-169)	Gene-wise	NO
	LZTR1	ENST00000215739.8	CCDS33606.1	840	9	0.0107143	1	PER1=9aa(281-289)	Gene-wise	NO
	MCOLN1	ENST00000264079.6	CCDS12180.1	580	9	0.0155172	1	PER1=9aa(461-469)	Gene-wise	NO
	MET	ENST00000318493.6	CCDS47689.1	1408	9	0.00639205	1	PER1=9aa(1246-1254)	Gene-wise	NO
	MFSD2A	ENST00000372809.5	CCDS44118.1	543	9	0.0165746	1	PER1=9aa(171-179)	Gene-wise	NO
	MMAB	ENST00000545712.2	CCDS9131.1	250	9	0.036	1	PER1=9aa(186-194)	Gene-wise	NO
	MNX1	#N/A	CCDS34788.1	401	18	0.0448878	2	PER1=9aa(246-254),PER2=9aa(286-294)	Gene-wise	NO
	NFE2L2	ENST00000397062.3	CCDS42782.1	605	9	0.014876	1	PER1=9aa(76-84)	Gene-wise	NO
	NFKBIA	ENST00000216797.5	CCDS9656.1	317	9	0.0283912	1	PER1=9aa(31-39)	Gene-wise	NO
	NIPBL	ENST00000282516.8	CCDS3920.1	2804	9	0.0032097	1	PER1=9aa(2086-2094)	Gene-wise	NO
	NTRK2	ENST00000376214.1	CCDS6671.1	838	9	0.0107399	1	PER1=9aa(716-724)	Gene-wise	NO
	OFD1	ENST00000340096.6	CCDS14157.1	1012	9	0.00889328	1	PER1=9aa(71-79)	Gene-wise	NO
	OSMR	ENST00000274276.3	CCDS3928.1	979	9	0.00919305	1	PER1=9aa(611-619)	Gene-wise	NO
	PGAP3	ENST00000300658.4	CCDS32641.1	320	9	0.028125	1	PER1=9aa(281-289)	Gene-wise	NO
	PRPF3	ENST00000324862.6	CCDS951.1	683	9	0.0131772	1	PER1=9aa(486-494)	Gene-wise	NO
	PRPF8	ENST00000572621.1	CCDS11010.1	2335	9	0.00385439	1	PER1=9aa(2306-2314)	Gene-wise	NO
	PRSS1	ENST00000311737.7	CCDS5872.1	247	9	0.0364372	1	PER1=9aa(16-24)	Gene-wise	NO
	RASA1	ENST00000274376.6	CCDS34200.1	1047	9	0.00859599	1	PER1=9aa(396-404)	Gene-wise	NO
	RBM20	#N/A	CCDS44477.1	1227	9	0.00733496	1	PER1=9aa(631-639)	Gene-wise	NO
	RERE	ENST00000337907.3	CCDS95.1	1566	14	0.00893997	1	PER1=14aa(1426-1439)	Gene-wise	NO
	RHOBTB2	ENST00000519685.1	CCDS55210.1	749	9	0.012016	1	PER1=9aa(506-514)	Gene-wise	NO
	RNF6	ENST00000381588.4	CCDS9316.1	685	9	0.0131387	1	PER1=9aa(236-244)	Gene-wise	NO
	RPGRIP1	ENST00000400017.2	CCDS45080.1	1286	9	0.00699844	1	PER1=9aa(876-884)	Gene-wise	NO
	SASH1	ENST00000367467.3	CCDS5212.1	1247	14	0.0112269	1	PER1=14aa(506-519)	Gene-wise	NO
	SDHAF1	ENST00000378887.2	CCDS32999.1	115	9	0.0782609	1	PER1=9aa(51-59)	Gene-wise	NO
	SETBP1	ENST00000282030.5	CCDS11923.2	1596	19	0.0119048	1	PER1=19aa(861-879)	Gene-wise	NO
	SH2B3	ENST00000341259.2	CCDS9153.1	575	9	0.0156522	1	PER1=9aa(206-214)	Gene-wise	NO
	SH3TC2	ENST00000515425.1	CCDS4293.1	1288	9	0.00698758	1	PER1=9aa(656-664)	Gene-wise	NO
	SHOX	ENST00000381578.1	CCDS14107.1	292	9	0.0308219	1	PER1=9aa(161-169)	Gene-wise	NO
	SKI	ENST00000378536.4	CCDS39.1	728	32	0.043956	3	PER1=9aa(16-24),PER2=14aa(26-39),PER3=9aa(111-119)	Gene-wise	NO
	SMCHD1	ENST00000320876.6	CCDS45822.1	2005	9	0.00448878	1	PER1=9aa(131-139)	Gene-wise	NO
	SPINT2	ENST00000301244.7	CCDS12510.1	252	9	0.0357143	1	PER1=9aa(161-169)	Gene-wise	NO
	TBXAS1	ENST00000416849.2	CCDS55174.1	580	9	0.0155172	1	PER1=9aa(81-89)	Gene-wise	NO
	TCOF1	ENST00000504761.2	CCDS54936.1	1488	18	0.0120968	2	PER1=9aa(21-29),PER2=9aa(46-54)	Gene-wise	NO
	TEK	ENST00000380036.4	CCDS6519.1	1124	9	0.00800712	1	PER1=9aa(911-919)	Gene-wise	NO
	TGFB1	ENST00000221930.5	CCDS33031.1	390	9	0.0230769	1	PER1=9aa(216-224)	Gene-wise	NO
	TINF2	ENST00000267415.7	CCDS41936.1	451	19	0.0421286	1	PER1=19aa(276-294)	Gene-wise	NO
	TNFRSF11A	ENST00000586569.1	CCDS11980.1	616	9	0.0146104	1	PER1=9aa(126-134)	Gene-wise	NO
	TRIO	ENST00000344204.4	CCDS3883.1	3097	9	0.00290604	1	PER1=9aa(1461-1469)	Gene-wise	NO
	TRPS1	ENST00000395715.3	CCDS6318.2	1294	28	0.0216383	2	PER1=14aa(906-919),PER2=14aa(926-939)	Gene-wise	NO
	TRRAP	ENST00000359863.4	CCDS59066.1	3859	9	0.00233221	1	PER1=9aa(1031-1039)	Gene-wise	NO
	UBIAD1	ENST00000376810.5	CCDS129.1	338	18	0.0532544	2	PER1=9aa(116-124),PER2=9aa(171-179)	Gene-wise	NO
	WNK4	ENST00000246914.5	CCDS11439.1	1243	14	0.0112631	1	PER1=14aa(556-569)	Gene-wise	NO
	ZBTB20	ENST00000474710.1	CCDS54626.1	741	23	0.0310391	2	PER1=14aa(596-609),PER2=9aa(621-629)	Gene-wise	NO

## Sheet: 3) FW PERs in BED format
	Chr	Pos	Ref	Gene	Orientation	Transcript	Codon	AA	Approach	PER	Stats	Family	Members
	7	117282621	A	CFTR	+	ENST00000003084	1283	R	Family-wise	PER1	adj-p=2.65e-02;logp=-1.58;OR=4.98(95%C.I.=2.56-Inf)	2390.para.1	ABCC3;ABCC1;ABCC2;ABCC6;ABCC4;ABCC11;ABCC12;ABCC5;ABCC10;CFTR
	7	117282622	G	CFTR	+	ENST00000003084	1283	R	Family-wise	PER1	adj-p=2.65e-02;logp=-1.58;OR=4.98(95%C.I.=2.56-Inf)	2390.para.1	ABCC3;ABCC1;ABCC2;ABCC6;ABCC4;ABCC11;ABCC12;ABCC5;ABCC10;CFTR
	7	117282623	G	CFTR	+	ENST00000003084	1283	R	Family-wise	PER1	adj-p=2.65e-02;logp=-1.58;OR=4.98(95%C.I.=2.56-Inf)	2390.para.1	ABCC3;ABCC1;ABCC2;ABCC6;ABCC4;ABCC11;ABCC12;ABCC5;ABCC10;CFTR
	7	117282624	A	CFTR	+	ENST00000003084	1284	K	Family-wise	PER1	adj-p=2.65e-02;logp=-1.58;OR=4.98(95%C.I.=2.56-Inf)	2390.para.1	ABCC3;ABCC1;ABCC2;ABCC6;ABCC4;ABCC11;ABCC12;ABCC5;ABCC10;CFTR
	7	117282625	A	CFTR	+	ENST00000003084	1284	K	Family-wise	PER1	adj-p=2.65e-02;logp=-1.58;OR=4.98(95%C.I.=2.56-Inf)	2390.para.1	ABCC3;ABCC1;ABCC2;ABCC6;ABCC4;ABCC11;ABCC12;ABCC5;ABCC10;CFTR
	7	117282626	A	CFTR	+	ENST00000003084	1284	K	Family-wise	PER1	adj-p=2.65e-02;logp=-1.58;OR=4.98(95%C.I.=2.56-Inf)	2390.para.1	ABCC3;ABCC1;ABCC2;ABCC6;ABCC4;ABCC11;ABCC12;ABCC5;ABCC10;CFTR
	7	117282627	G	CFTR	+	ENST00000003084	1285	A	Family-wise	PER1	adj-p=2.65e-02;logp=-1.58;OR=4.98(95%C.I.=2.56-Inf)	2390.para.1	ABCC3;ABCC1;ABCC2;ABCC6;ABCC4;ABCC11;ABCC12;ABCC5;ABCC10;CFTR
	7	117282628	C	CFTR	+	ENST00000003084	1285	A	Family-wise	PER1	adj-p=2.65e-02;logp=-1.58;OR=4.98(95%C.I.=2.56-Inf)	2390.para.1	ABCC3;ABCC1;ABCC2;ABCC6;ABCC4;ABCC11;ABCC12;ABCC5;ABCC10;CFTR
	7	117282629	C	CFTR	+	ENST00000003084	1285	A	Family-wise	PER1	adj-p=2.65e-02;logp=-1.58;OR=4.98(95%C.I.=2.56-Inf)	2390.para.1	ABCC3;ABCC1;ABCC2;ABCC6;ABCC4;ABCC11;ABCC12;ABCC5;ABCC10;CFTR
	7	117282630	T	CFTR	+	ENST00000003084	1286	F	Family-wise	PER1	adj-p=2.65e-02;logp=-1.58;OR=4.98(95%C.I.=2.56-Inf)	2390.para.1	ABCC3;ABCC1;ABCC2;ABCC6;ABCC4;ABCC11;ABCC12;ABCC5;ABCC10;CFTR
	7	117282631	T	CFTR	+	ENST00000003084	1286	F	Family-wise	PER1	adj-p=2.65e-02;logp=-1.58;OR=4.98(95%C.I.=2.56-Inf)	2390.para.1	ABCC3;ABCC1;ABCC2;ABCC6;ABCC4;ABCC11;ABCC12;ABCC5;ABCC10;CFTR
	7	117282632	T	CFTR	+	ENST00000003084	1286	F	Family-wise	PER1	adj-p=2.65e-02;logp=-1.58;OR=4.98(95%C.I.=2.56-Inf)	2390.para.1	ABCC3;ABCC1;ABCC2;ABCC6;ABCC4;ABCC11;ABCC12;ABCC5;ABCC10;CFTR
	7	117282633	G	CFTR	+	ENST00000003084	1287	G	Family-wise	PER1	adj-p=2.65e-02;logp=-1.58;OR=4.98(95%C.I.=2.56-Inf)	2390.para.1	ABCC3;ABCC1;ABCC2;ABCC6;ABCC4;ABCC11;ABCC12;ABCC5;ABCC10;CFTR
	7	117282634	G	CFTR	+	ENST00000003084	1287	G	Family-wise	PER1	adj-p=2.65e-02;logp=-1.58;OR=4.98(95%C.I.=2.56-Inf)	2390.para.1	ABCC3;ABCC1;ABCC2;ABCC6;ABCC4;ABCC11;ABCC12;ABCC5;ABCC10;CFTR
	7	117282635	A	CFTR	+	ENST00000003084	1287	G	Family-wise	PER1	adj-p=2.65e-02;logp=-1.58;OR=4.98(95%C.I.=2.56-Inf)	2390.para.1	ABCC3;ABCC1;ABCC2;ABCC6;ABCC4;ABCC11;ABCC12;ABCC5;ABCC10;CFTR
	7	117282636	G	CFTR	+	ENST00000003084	1288	V	Family-wise	PER1	adj-p=2.65e-02;logp=-1.58;OR=4.98(95%C.I.=2.56-Inf)	2390.para.1	ABCC3;ABCC1;ABCC2;ABCC6;ABCC4;ABCC11;ABCC12;ABCC5;ABCC10;CFTR
	7	117282637	T	CFTR	+	ENST00000003084	1288	V	Family-wise	PER1	adj-p=2.65e-02;logp=-1.58;OR=4.98(95%C.I.=2.56-Inf)	2390.para.1	ABCC3;ABCC1;ABCC2;ABCC6;ABCC4;ABCC11;ABCC12;ABCC5;ABCC10;CFTR
	7	117282638	G	CFTR	+	ENST00000003084	1288	V	Family-wise	PER1	adj-p=2.65e-02;logp=-1.58;OR=4.98(95%C.I.=2.56-Inf)	2390.para.1	ABCC3;ABCC1;ABCC2;ABCC6;ABCC4;ABCC11;ABCC12;ABCC5;ABCC10;CFTR
	7	117282639	A	CFTR	+	ENST00000003084	1289	I	Family-wise	PER1	adj-p=2.65e-02;logp=-1.58;OR=4.98(95%C.I.=2.56-Inf)	2390.para.1	ABCC3;ABCC1;ABCC2;ABCC6;ABCC4;ABCC11;ABCC12;ABCC5;ABCC10;CFTR
	7	117282640	T	CFTR	+	ENST00000003084	1289	I	Family-wise	PER1	adj-p=2.65e-02;logp=-1.58;OR=4.98(95%C.I.=2.56-Inf)	2390.para.1	ABCC3;ABCC1;ABCC2;ABCC6;ABCC4;ABCC11;ABCC12;ABCC5;ABCC10;CFTR
	7	117282641	A	CFTR	+	ENST00000003084	1289	I	Family-wise	PER1	adj-p=2.65e-02;logp=-1.58;OR=4.98(95%C.I.=2.56-Inf)	2390.para.1	ABCC3;ABCC1;ABCC2;ABCC6;ABCC4;ABCC11;ABCC12;ABCC5;ABCC10;CFTR
	7	117282642	C	CFTR	+	ENST00000003084	1290	P	Family-wise	PER1	adj-p=2.65e-02;logp=-1.58;OR=4.98(95%C.I.=2.56-Inf)	2390.para.1	ABCC3;ABCC1;ABCC2;ABCC6;ABCC4;ABCC11;ABCC12;ABCC5;ABCC10;CFTR
	7	117282643	C	CFTR	+	ENST00000003084	1290	P	Family-wise	PER1	adj-p=2.65e-02;logp=-1.58;OR=4.98(95%C.I.=2.56-Inf)	2390.para.1	ABCC3;ABCC1;ABCC2;ABCC6;ABCC4;ABCC11;ABCC12;ABCC5;ABCC10;CFTR
	7	117282644	A	CFTR	+	ENST00000003084	1290	P	Family-wise	PER1	adj-p=2.65e-02;logp=-1.58;OR=4.98(95%C.I.=2.56-Inf)	2390.para.1	ABCC3;ABCC1;ABCC2;ABCC6;ABCC4;ABCC11;ABCC12;ABCC5;ABCC10;CFTR
	7	117282645	C	CFTR	+	ENST00000003084	1291	Q	Family-wise	PER1	adj-p=2.65e-02;logp=-1.58;OR=4.98(95%C.I.=2.56-Inf)	2390.para.1	ABCC3;ABCC1;ABCC2;ABCC6;ABCC4;ABCC11;ABCC12;ABCC5;ABCC10;CFTR
	7	117282646	A	CFTR	+	ENST00000003084	1291	Q	Family-wise	PER1	adj-p=2.65e-02;logp=-1.58;OR=4.98(95%C.I.=2.56-Inf)	2390.para.1	ABCC3;ABCC1;ABCC2;ABCC6;ABCC4;ABCC11;ABCC12;ABCC5;ABCC10;CFTR
	7	117282647	G	CFTR	+	ENST00000003084	1291	Q	Family-wise	PER1	adj-p=2.65e-02;logp=-1.58;OR=4.98(95%C.I.=2.56-Inf)	2390.para.1	ABCC3;ABCC1;ABCC2;ABCC6;ABCC4;ABCC11;ABCC12;ABCC5;ABCC10;CFTR
	11	17552781	G	USH1C	-	ENST00000005226	103	R	Family-wise	PER1	adj-p=1.42e-02;logp=-1.85;OR=27.88(95%C.I.=7.19-Inf)	1633.para.1	USH1C;PDZD7
	11	17552780	C	USH1C	-	ENST00000005226	103	R	Family-wise	PER1	adj-p=1.42e-02;logp=-1.85;OR=27.88(95%C.I.=7.19-Inf)	1633.para.1	USH1C;PDZD7
	11	17552779	A	USH1C	-	ENST00000005226	103	R	Family-wise	PER1	adj-p=1.42e-02;logp=-1.85;OR=27.88(95%C.I.=7.19-Inf)	1633.para.1	USH1C;PDZD7
	11	17552778	C	USH1C	-	ENST00000005226	104	G	Family-wise	PER1	adj-p=1.42e-02;logp=-1.85;OR=27.88(95%C.I.=7.19-Inf)	1633.para.1	USH1C;PDZD7
	11	17552777	C	USH1C	-	ENST00000005226	104	G	Family-wise	PER1	adj-p=1.42e-02;logp=-1.85;OR=27.88(95%C.I.=7.19-Inf)	1633.para.1	USH1C;PDZD7
	11	17552776	A	USH1C	-	ENST00000005226	104	G	Family-wise	PER1	adj-p=1.42e-02;logp=-1.85;OR=27.88(95%C.I.=7.19-Inf)	1633.para.1	USH1C;PDZD7
	11	17552775	C	USH1C	-	ENST00000005226	105	G	Family-wise	PER1	adj-p=1.42e-02;logp=-1.85;OR=27.88(95%C.I.=7.19-Inf)	1633.para.1	USH1C;PDZD7
	11	17552774	C	USH1C	-	ENST00000005226	105	G	Family-wise	PER1	adj-p=1.42e-02;logp=-1.85;OR=27.88(95%C.I.=7.19-Inf)	1633.para.1	USH1C;PDZD7
	11	17552773	G	USH1C	-	ENST00000005226	105	G	Family-wise	PER1	adj-p=1.42e-02;logp=-1.85;OR=27.88(95%C.I.=7.19-Inf)	1633.para.1	USH1C;PDZD7
	11	17552772	G	USH1C	-	ENST00000005226	106	L	Family-wise	PER1	adj-p=1.42e-02;logp=-1.85;OR=27.88(95%C.I.=7.19-Inf)	1633.para.1	USH1C;PDZD7
	11	17552771	A	USH1C	-	ENST00000005226	106	L	Family-wise	PER1	adj-p=1.42e-02;logp=-1.85;OR=27.88(95%C.I.=7.19-Inf)	1633.para.1	USH1C;PDZD7
	11	17552770	C	USH1C	-	ENST00000005226	106	L	Family-wise	PER1	adj-p=1.42e-02;logp=-1.85;OR=27.88(95%C.I.=7.19-Inf)	1633.para.1	USH1C;PDZD7
	11	17552769	C	USH1C	-	ENST00000005226	107	E	Family-wise	PER1	adj-p=1.42e-02;logp=-1.85;OR=27.88(95%C.I.=7.19-Inf)	1633.para.1	USH1C;PDZD7
	11	17552768	T	USH1C	-	ENST00000005226	107	E	Family-wise	PER1	adj-p=1.42e-02;logp=-1.85;OR=27.88(95%C.I.=7.19-Inf)	1633.para.1	USH1C;PDZD7
	11	17552767	C	USH1C	-	ENST00000005226	107	E	Family-wise	PER1	adj-p=1.42e-02;logp=-1.85;OR=27.88(95%C.I.=7.19-Inf)	1633.para.1	USH1C;PDZD7
	11	17552766	A	USH1C	-	ENST00000005226	108	F	Family-wise	PER1	adj-p=1.42e-02;logp=-1.85;OR=27.88(95%C.I.=7.19-Inf)	1633.para.1	USH1C;PDZD7
	11	17552765	A	USH1C	-	ENST00000005226	108	F	Family-wise	PER1	adj-p=1.42e-02;logp=-1.85;OR=27.88(95%C.I.=7.19-Inf)	1633.para.1	USH1C;PDZD7
	11	17552764	A	USH1C	-	ENST00000005226	108	F	Family-wise	PER1	adj-p=1.42e-02;logp=-1.85;OR=27.88(95%C.I.=7.19-Inf)	1633.para.1	USH1C;PDZD7
	11	17552763	C	USH1C	-	ENST00000005226	109	G	Family-wise	PER1	adj-p=1.42e-02;logp=-1.85;OR=27.88(95%C.I.=7.19-Inf)	1633.para.1	USH1C;PDZD7
	11	17552762	C	USH1C	-	ENST00000005226	109	G	Family-wise	PER1	adj-p=1.42e-02;logp=-1.85;OR=27.88(95%C.I.=7.19-Inf)	1633.para.1	USH1C;PDZD7
	11	17552761	G	USH1C	-	ENST00000005226	109	G	Family-wise	PER1	adj-p=1.42e-02;logp=-1.85;OR=27.88(95%C.I.=7.19-Inf)	1633.para.1	USH1C;PDZD7
	11	17552760	A	USH1C	-	ENST00000005226	110	C	Family-wise	PER1	adj-p=1.42e-02;logp=-1.85;OR=27.88(95%C.I.=7.19-Inf)	1633.para.1	USH1C;PDZD7
	11	17552759	C	USH1C	-	ENST00000005226	110	C	Family-wise	PER1	adj-p=1.42e-02;logp=-1.85;OR=27.88(95%C.I.=7.19-Inf)	1633.para.1	USH1C;PDZD7
	11	17552758	A	USH1C	-	ENST00000005226	110	C	Family-wise	PER1	adj-p=1.42e-02;logp=-1.85;OR=27.88(95%C.I.=7.19-Inf)	1633.para.1	USH1C;PDZD7
	11	17552757	C	USH1C	-	ENST00000005226	111	G	Family-wise	PER1	adj-p=1.42e-02;logp=-1.85;OR=27.88(95%C.I.=7.19-Inf)	1633.para.1	USH1C;PDZD7
	11	17552756	C	USH1C	-	ENST00000005226	111	G	Family-wise	PER1	adj-p=1.42e-02;logp=-1.85;OR=27.88(95%C.I.=7.19-Inf)	1633.para.1	USH1C;PDZD7
	11	17552755	C	USH1C	-	ENST00000005226	111	G	Family-wise	PER1	adj-p=1.42e-02;logp=-1.85;OR=27.88(95%C.I.=7.19-Inf)	1633.para.1	USH1C;PDZD7
	7	39726321	A	RALA	+	ENST00000005257	19	M	Family-wise	PER1	adj-p=7.84e-07;logp=-6.11;OR=18.69(95%C.I.=7.61-Inf)	3537.para.2	RRAS2;RRAS;MRAS;NRAS;KRAS;HRAS;RALB;RALA;ERAS
	7	39726322	T	RALA	+	ENST00000005257	19	M	Family-wise	PER1	adj-p=7.84e-07;logp=-6.11;OR=18.69(95%C.I.=7.61-Inf)	3537.para.2	RRAS2;RRAS;MRAS;NRAS;KRAS;HRAS;RALB;RALA;ERAS
	7	39726323	G	RALA	+	ENST00000005257	19	M	Family-wise	PER1	adj-p=7.84e-07;logp=-6.11;OR=18.69(95%C.I.=7.61-Inf)	3537.para.2	RRAS2;RRAS;MRAS;NRAS;KRAS;HRAS;RALB;RALA;ERAS
	7	39726324	G	RALA	+	ENST00000005257	20	V	Family-wise	PER1	adj-p=7.84e-07;logp=-6.11;OR=18.69(95%C.I.=7.61-Inf)	3537.para.2	RRAS2;RRAS;MRAS;NRAS;KRAS;HRAS;RALB;RALA;ERAS
	7	39726325	T	RALA	+	ENST00000005257	20	V	Family-wise	PER1	adj-p=7.84e-07;logp=-6.11;OR=18.69(95%C.I.=7.61-Inf)	3537.para.2	RRAS2;RRAS;MRAS;NRAS;KRAS;HRAS;RALB;RALA;ERAS
	7	39726326	G	RALA	+	ENST00000005257	20	V	Family-wise	PER1	adj-p=7.84e-07;logp=-6.11;OR=18.69(95%C.I.=7.61-Inf)	3537.para.2	RRAS2;RRAS;MRAS;NRAS;KRAS;HRAS;RALB;RALA;ERAS
	7	39726327	G	RALA	+	ENST00000005257	21	G	Family-wise	PER1	adj-p=7.84e-07;logp=-6.11;OR=18.69(95%C.I.=7.61-Inf)	3537.para.2	RRAS2;RRAS;MRAS;NRAS;KRAS;HRAS;RALB;RALA;ERAS
	7	39726328	G	RALA	+	ENST00000005257	21	G	Family-wise	PER1	adj-p=7.84e-07;logp=-6.11;OR=18.69(95%C.I.=7.61-Inf)	3537.para.2	RRAS2;RRAS;MRAS;NRAS;KRAS;HRAS;RALB;RALA;ERAS
	7	39726329	C	RALA	+	ENST00000005257	21	G	Family-wise	PER1	adj-p=7.84e-07;logp=-6.11;OR=18.69(95%C.I.=7.61-Inf)	3537.para.2	RRAS2;RRAS;MRAS;NRAS;KRAS;HRAS;RALB;RALA;ERAS
	7	39726330	A	RALA	+	ENST00000005257	22	S	Family-wise	PER1	adj-p=7.84e-07;logp=-6.11;OR=18.69(95%C.I.=7.61-Inf)	3537.para.2	RRAS2;RRAS;MRAS;NRAS;KRAS;HRAS;RALB;RALA;ERAS
	7	39726331	G	RALA	+	ENST00000005257	22	S	Family-wise	PER1	adj-p=7.84e-07;logp=-6.11;OR=18.69(95%C.I.=7.61-Inf)	3537.para.2	RRAS2;RRAS;MRAS;NRAS;KRAS;HRAS;RALB;RALA;ERAS
	7	39726332	T	RALA	+	ENST00000005257	22	S	Family-wise	PER1	adj-p=7.84e-07;logp=-6.11;OR=18.69(95%C.I.=7.61-Inf)	3537.para.2	RRAS2;RRAS;MRAS;NRAS;KRAS;HRAS;RALB;RALA;ERAS
	7	39726333	G	RALA	+	ENST00000005257	23	G	Family-wise	PER1	adj-p=7.84e-07;logp=-6.11;OR=18.69(95%C.I.=7.61-Inf)	3537.para.2	RRAS2;RRAS;MRAS;NRAS;KRAS;HRAS;RALB;RALA;ERAS
	7	39726334	G	RALA	+	ENST00000005257	23	G	Family-wise	PER1	adj-p=7.84e-07;logp=-6.11;OR=18.69(95%C.I.=7.61-Inf)	3537.para.2	RRAS2;RRAS;MRAS;NRAS;KRAS;HRAS;RALB;RALA;ERAS
	7	39726335	T	RALA	+	ENST00000005257	23	G	Family-wise	PER1	adj-p=7.84e-07;logp=-6.11;OR=18.69(95%C.I.=7.61-Inf)	3537.para.2	RRAS2;RRAS;MRAS;NRAS;KRAS;HRAS;RALB;RALA;ERAS
	7	39726336	G	RALA	+	ENST00000005257	24	G	Family-wise	PER1	adj-p=5.26e-06;logp=-5.28;OR=23.66(95%C.I.=8.14-Inf)	3537.para.2	RRAS2;RRAS;MRAS;NRAS;KRAS;HRAS;RALB;RALA;ERAS
	7	39726337	G	RALA	+	ENST00000005257	24	G	Family-wise	PER1	adj-p=5.26e-06;logp=-5.28;OR=23.66(95%C.I.=8.14-Inf)	3537.para.2	RRAS2;RRAS;MRAS;NRAS;KRAS;HRAS;RALB;RALA;ERAS
	7	39726338	C	RALA	+	ENST00000005257	24	G	Family-wise	PER1	adj-p=5.26e-06;logp=-5.28;OR=23.66(95%C.I.=8.14-Inf)	3537.para.2	RRAS2;RRAS;MRAS;NRAS;KRAS;HRAS;RALB;RALA;ERAS
	7	39726339	G	RALA	+	ENST00000005257	25	V	Family-wise	PER1	adj-p=5.26e-06;logp=-5.28;OR=23.66(95%C.I.=8.14-Inf)	3537.para.2	RRAS2;RRAS;MRAS;NRAS;KRAS;HRAS;RALB;RALA;ERAS
	7	39726340	T	RALA	+	ENST00000005257	25	V	Family-wise	PER1	adj-p=5.26e-06;logp=-5.28;OR=23.66(95%C.I.=8.14-Inf)	3537.para.2	RRAS2;RRAS;MRAS;NRAS;KRAS;HRAS;RALB;RALA;ERAS
	7	39726341	G	RALA	+	ENST00000005257	25	V	Family-wise	PER1	adj-p=5.26e-06;logp=-5.28;OR=23.66(95%C.I.=8.14-Inf)	3537.para.2	RRAS2;RRAS;MRAS;NRAS;KRAS;HRAS;RALB;RALA;ERAS
	7	39726342	G	RALA	+	ENST00000005257	26	G	Family-wise	PER1	adj-p=5.26e-06;logp=-5.28;OR=23.66(95%C.I.=8.14-Inf)	3537.para.2	RRAS2;RRAS;MRAS;NRAS;KRAS;HRAS;RALB;RALA;ERAS
	7	39726343	G	RALA	+	ENST00000005257	26	G	Family-wise	PER1	adj-p=5.26e-06;logp=-5.28;OR=23.66(95%C.I.=8.14-Inf)	3537.para.2	RRAS2;RRAS;MRAS;NRAS;KRAS;HRAS;RALB;RALA;ERAS
	7	39726344	C	RALA	+	ENST00000005257	26	G	Family-wise	PER1	adj-p=5.26e-06;logp=-5.28;OR=23.66(95%C.I.=8.14-Inf)	3537.para.2	RRAS2;RRAS;MRAS;NRAS;KRAS;HRAS;RALB;RALA;ERAS
	7	39726345	A	RALA	+	ENST00000005257	27	K	Family-wise	PER1	adj-p=5.26e-06;logp=-5.28;OR=23.66(95%C.I.=8.14-Inf)	3537.para.2	RRAS2;RRAS;MRAS;NRAS;KRAS;HRAS;RALB;RALA;ERAS
	7	39726346	A	RALA	+	ENST00000005257	27	K	Family-wise	PER1	adj-p=5.26e-06;logp=-5.28;OR=23.66(95%C.I.=8.14-Inf)	3537.para.2	RRAS2;RRAS;MRAS;NRAS;KRAS;HRAS;RALB;RALA;ERAS
	7	39726347	G	RALA	+	ENST00000005257	27	K	Family-wise	PER1	adj-p=5.26e-06;logp=-5.28;OR=23.66(95%C.I.=8.14-Inf)	3537.para.2	RRAS2;RRAS;MRAS;NRAS;KRAS;HRAS;RALB;RALA;ERAS
	7	39726348	T	RALA	+	ENST00000005257	28	S	Family-wise	PER1	adj-p=5.26e-06;logp=-5.28;OR=23.66(95%C.I.=8.14-Inf)	3537.para.2	RRAS2;RRAS;MRAS;NRAS;KRAS;HRAS;RALB;RALA;ERAS
	7	39726349	C	RALA	+	ENST00000005257	28	S	Family-wise	PER1	adj-p=5.26e-06;logp=-5.28;OR=23.66(95%C.I.=8.14-Inf)	3537.para.2	RRAS2;RRAS;MRAS;NRAS;KRAS;HRAS;RALB;RALA;ERAS
	7	39726350	A	RALA	+	ENST00000005257	28	S	Family-wise	PER1	adj-p=5.26e-06;logp=-5.28;OR=23.66(95%C.I.=8.14-Inf)	3537.para.2	RRAS2;RRAS;MRAS;NRAS;KRAS;HRAS;RALB;RALA;ERAS
	7	39726351	G	RALA	+	ENST00000005257	29	A	Family-wise	PER1	adj-p=5.26e-06;logp=-5.28;OR=23.66(95%C.I.=8.14-Inf)	3537.para.2	RRAS2;RRAS;MRAS;NRAS;KRAS;HRAS;RALB;RALA;ERAS
	7	39726352	C	RALA	+	ENST00000005257	29	A	Family-wise	PER1	adj-p=5.26e-06;logp=-5.28;OR=23.66(95%C.I.=8.14-Inf)	3537.para.2	RRAS2;RRAS;MRAS;NRAS;KRAS;HRAS;RALB;RALA;ERAS
	7	39726353	T	RALA	+	ENST00000005257	29	A	Family-wise	PER1	adj-p=5.26e-06;logp=-5.28;OR=23.66(95%C.I.=8.14-Inf)	3537.para.2	RRAS2;RRAS;MRAS;NRAS;KRAS;HRAS;RALB;RALA;ERAS
	7	39726354	C	RALA	+	ENST00000005257	30	L	Family-wise	PER1	adj-p=5.26e-06;logp=-5.28;OR=23.66(95%C.I.=8.14-Inf)	3537.para.2	RRAS2;RRAS;MRAS;NRAS;KRAS;HRAS;RALB;RALA;ERAS
	7	39726355	T	RALA	+	ENST00000005257	30	L	Family-wise	PER1	adj-p=5.26e-06;logp=-5.28;OR=23.66(95%C.I.=8.14-Inf)	3537.para.2	RRAS2;RRAS;MRAS;NRAS;KRAS;HRAS;RALB;RALA;ERAS
	7	39726356	G	RALA	+	ENST00000005257	30	L	Family-wise	PER1	adj-p=5.26e-06;logp=-5.28;OR=23.66(95%C.I.=8.14-Inf)	3537.para.2	RRAS2;RRAS;MRAS;NRAS;KRAS;HRAS;RALB;RALA;ERAS
	7	39726357	A	RALA	+	ENST00000005257	31	T	Family-wise	PER1	adj-p=5.26e-06;logp=-5.28;OR=23.66(95%C.I.=8.14-Inf)	3537.para.2	RRAS2;RRAS;MRAS;NRAS;KRAS;HRAS;RALB;RALA;ERAS
	7	39726358	C	RALA	+	ENST00000005257	31	T	Family-wise	PER1	adj-p=5.26e-06;logp=-5.28;OR=23.66(95%C.I.=8.14-Inf)	3537.para.2	RRAS2;RRAS;MRAS;NRAS;KRAS;HRAS;RALB;RALA;ERAS
	7	39726359	T	RALA	+	ENST00000005257	31	T	Family-wise	PER1	adj-p=5.26e-06;logp=-5.28;OR=23.66(95%C.I.=8.14-Inf)	3537.para.2	RRAS2;RRAS;MRAS;NRAS;KRAS;HRAS;RALB;RALA;ERAS
	7	39726360	C	RALA	+	ENST00000005257	32	L	Family-wise	PER1	adj-p=5.26e-06;logp=-5.28;OR=23.66(95%C.I.=8.14-Inf)	3537.para.2	RRAS2;RRAS;MRAS;NRAS;KRAS;HRAS;RALB;RALA;ERAS
	7	39726361	T	RALA	+	ENST00000005257	32	L	Family-wise	PER1	adj-p=5.26e-06;logp=-5.28;OR=23.66(95%C.I.=8.14-Inf)	3537.para.2	RRAS2;RRAS;MRAS;NRAS;KRAS;HRAS;RALB;RALA;ERAS
	7	39726362	A	RALA	+	ENST00000005257	32	L	Family-wise	PER1	adj-p=5.26e-06;logp=-5.28;OR=23.66(95%C.I.=8.14-Inf)	3537.para.2	RRAS2;RRAS;MRAS;NRAS;KRAS;HRAS;RALB;RALA;ERAS
	7	39726363	C	RALA	+	ENST00000005257	33	Q	Family-wise	PER1	adj-p=8.31e-04;logp=-3.08;OR=14.82(95%C.I.=4.96-Inf)	3537.para.2	RRAS2;RRAS;MRAS;NRAS;KRAS;HRAS;RALB;RALA;ERAS
	7	39726364	A	RALA	+	ENST00000005257	33	Q	Family-wise	PER1	adj-p=8.31e-04;logp=-3.08;OR=14.82(95%C.I.=4.96-Inf)	3537.para.2	RRAS2;RRAS;MRAS;NRAS;KRAS;HRAS;RALB;RALA;ERAS
	7	39726365	G	RALA	+	ENST00000005257	33	Q	Family-wise	PER1	adj-p=8.31e-04;logp=-3.08;OR=14.82(95%C.I.=4.96-Inf)	3537.para.2	RRAS2;RRAS;MRAS;NRAS;KRAS;HRAS;RALB;RALA;ERAS
	7	39726366	T	RALA	+	ENST00000005257	34	F	Family-wise	PER1	adj-p=8.31e-04;logp=-3.08;OR=14.82(95%C.I.=4.96-Inf)	3537.para.2	RRAS2;RRAS;MRAS;NRAS;KRAS;HRAS;RALB;RALA;ERAS
	7	39726367	T	RALA	+	ENST00000005257	34	F	Family-wise	PER1	adj-p=8.31e-04;logp=-3.08;OR=14.82(95%C.I.=4.96-Inf)	3537.para.2	RRAS2;RRAS;MRAS;NRAS;KRAS;HRAS;RALB;RALA;ERAS
	7	39726368	C	RALA	+	ENST00000005257	34	F	Family-wise	PER1	adj-p=8.31e-04;logp=-3.08;OR=14.82(95%C.I.=4.96-Inf)	3537.para.2	RRAS2;RRAS;MRAS;NRAS;KRAS;HRAS;RALB;RALA;ERAS
	7	39726369	A	RALA	+	ENST00000005257	35	M	Family-wise	PER1	adj-p=8.31e-04;logp=-3.08;OR=14.82(95%C.I.=4.96-Inf)	3537.para.2	RRAS2;RRAS;MRAS;NRAS;KRAS;HRAS;RALB;RALA;ERAS
	7	39726370	T	RALA	+	ENST00000005257	35	M	Family-wise	PER1	adj-p=8.31e-04;logp=-3.08;OR=14.82(95%C.I.=4.96-Inf)	3537.para.2	RRAS2;RRAS;MRAS;NRAS;KRAS;HRAS;RALB;RALA;ERAS
	7	39726371	G	RALA	+	ENST00000005257	35	M	Family-wise	PER1	adj-p=8.31e-04;logp=-3.08;OR=14.82(95%C.I.=4.96-Inf)	3537.para.2	RRAS2;RRAS;MRAS;NRAS;KRAS;HRAS;RALB;RALA;ERAS
	7	39726372	T	RALA	+	ENST00000005257	36	Y	Family-wise	PER1	adj-p=8.31e-04;logp=-3.08;OR=14.82(95%C.I.=4.96-Inf)	3537.para.2	RRAS2;RRAS;MRAS;NRAS;KRAS;HRAS;RALB;RALA;ERAS
	7	39726373	A	RALA	+	ENST00000005257	36	Y	Family-wise	PER1	adj-p=8.31e-04;logp=-3.08;OR=14.82(95%C.I.=4.96-Inf)	3537.para.2	RRAS2;RRAS;MRAS;NRAS;KRAS;HRAS;RALB;RALA;ERAS
	7	39726374	C	RALA	+	ENST00000005257	36	Y	Family-wise	PER1	adj-p=8.31e-04;logp=-3.08;OR=14.82(95%C.I.=4.96-Inf)	3537.para.2	RRAS2;RRAS;MRAS;NRAS;KRAS;HRAS;RALB;RALA;ERAS
	7	39726375	G	RALA	+	ENST00000005257	37	D	Family-wise	PER1	adj-p=8.31e-04;logp=-3.08;OR=14.82(95%C.I.=4.96-Inf)	3537.para.2	RRAS2;RRAS;MRAS;NRAS;KRAS;HRAS;RALB;RALA;ERAS
	7	39726376	A	RALA	+	ENST00000005257	37	D	Family-wise	PER1	adj-p=8.31e-04;logp=-3.08;OR=14.82(95%C.I.=4.96-Inf)	3537.para.2	RRAS2;RRAS;MRAS;NRAS;KRAS;HRAS;RALB;RALA;ERAS
	7	39726377	T	RALA	+	ENST00000005257	37	D	Family-wise	PER1	adj-p=8.31e-04;logp=-3.08;OR=14.82(95%C.I.=4.96-Inf)	3537.para.2	RRAS2;RRAS;MRAS;NRAS;KRAS;HRAS;RALB;RALA;ERAS
	7	39730056	A	RALA	+	ENST00000005257	64	I	Family-wise	PER2	adj-p=3.13e-11;logp=-10.50;OR=21.52(95%C.I.=10.32-Inf)	3537.para.2	RRAS2;RRAS;MRAS;NRAS;KRAS;HRAS;RALB;RALA;ERAS
	7	39730057	T	RALA	+	ENST00000005257	64	I	Family-wise	PER2	adj-p=3.13e-11;logp=-10.50;OR=21.52(95%C.I.=10.32-Inf)	3537.para.2	RRAS2;RRAS;MRAS;NRAS;KRAS;HRAS;RALB;RALA;ERAS
	7	39730058	C	RALA	+	ENST00000005257	64	I	Family-wise	PER2	adj-p=3.13e-11;logp=-10.50;OR=21.52(95%C.I.=10.32-Inf)	3537.para.2	RRAS2;RRAS;MRAS;NRAS;KRAS;HRAS;RALB;RALA;ERAS
	7	39730059	G	RALA	+	ENST00000005257	65	D	Family-wise	PER2	adj-p=3.13e-11;logp=-10.50;OR=21.52(95%C.I.=10.32-Inf)	3537.para.2	RRAS2;RRAS;MRAS;NRAS;KRAS;HRAS;RALB;RALA;ERAS
	7	39730060	A	RALA	+	ENST00000005257	65	D	Family-wise	PER2	adj-p=3.13e-11;logp=-10.50;OR=21.52(95%C.I.=10.32-Inf)	3537.para.2	RRAS2;RRAS;MRAS;NRAS;KRAS;HRAS;RALB;RALA;ERAS
	7	39730061	T	RALA	+	ENST00000005257	65	D	Family-wise	PER2	adj-p=3.13e-11;logp=-10.50;OR=21.52(95%C.I.=10.32-Inf)	3537.para.2	RRAS2;RRAS;MRAS;NRAS;KRAS;HRAS;RALB;RALA;ERAS
	7	39730062	A	RALA	+	ENST00000005257	66	I	Family-wise	PER2	adj-p=3.13e-11;logp=-10.50;OR=21.52(95%C.I.=10.32-Inf)	3537.para.2	RRAS2;RRAS;MRAS;NRAS;KRAS;HRAS;RALB;RALA;ERAS
	7	39730063	T	RALA	+	ENST00000005257	66	I	Family-wise	PER2	adj-p=3.13e-11;logp=-10.50;OR=21.52(95%C.I.=10.32-Inf)	3537.para.2	RRAS2;RRAS;MRAS;NRAS;KRAS;HRAS;RALB;RALA;ERAS
	7	39730064	C	RALA	+	ENST00000005257	66	I	Family-wise	PER2	adj-p=3.13e-11;logp=-10.50;OR=21.52(95%C.I.=10.32-Inf)	3537.para.2	RRAS2;RRAS;MRAS;NRAS;KRAS;HRAS;RALB;RALA;ERAS
	7	39730065	T	RALA	+	ENST00000005257	67	L	Family-wise	PER2	adj-p=3.13e-11;logp=-10.50;OR=21.52(95%C.I.=10.32-Inf)	3537.para.2	RRAS2;RRAS;MRAS;NRAS;KRAS;HRAS;RALB;RALA;ERAS
	7	39730066	T	RALA	+	ENST00000005257	67	L	Family-wise	PER2	adj-p=3.13e-11;logp=-10.50;OR=21.52(95%C.I.=10.32-Inf)	3537.para.2	RRAS2;RRAS;MRAS;NRAS;KRAS;HRAS;RALB;RALA;ERAS
	7	39730067	A	RALA	+	ENST00000005257	67	L	Family-wise	PER2	adj-p=3.13e-11;logp=-10.50;OR=21.52(95%C.I.=10.32-Inf)	3537.para.2	RRAS2;RRAS;MRAS;NRAS;KRAS;HRAS;RALB;RALA;ERAS
	7	39730068	G	RALA	+	ENST00000005257	68	D	Family-wise	PER2	adj-p=3.13e-11;logp=-10.50;OR=21.52(95%C.I.=10.32-Inf)	3537.para.2	RRAS2;RRAS;MRAS;NRAS;KRAS;HRAS;RALB;RALA;ERAS
	7	39730069	A	RALA	+	ENST00000005257	68	D	Family-wise	PER2	adj-p=3.13e-11;logp=-10.50;OR=21.52(95%C.I.=10.32-Inf)	3537.para.2	RRAS2;RRAS;MRAS;NRAS;KRAS;HRAS;RALB;RALA;ERAS
	7	39730070	T	RALA	+	ENST00000005257	68	D	Family-wise	PER2	adj-p=3.13e-11;logp=-10.50;OR=21.52(95%C.I.=10.32-Inf)	3537.para.2	RRAS2;RRAS;MRAS;NRAS;KRAS;HRAS;RALB;RALA;ERAS
	7	39730071	A	RALA	+	ENST00000005257	69	T	Family-wise	PER2	adj-p=3.13e-11;logp=-10.50;OR=21.52(95%C.I.=10.32-Inf)	3537.para.2	RRAS2;RRAS;MRAS;NRAS;KRAS;HRAS;RALB;RALA;ERAS
	7	39730072	C	RALA	+	ENST00000005257	69	T	Family-wise	PER2	adj-p=3.13e-11;logp=-10.50;OR=21.52(95%C.I.=10.32-Inf)	3537.para.2	RRAS2;RRAS;MRAS;NRAS;KRAS;HRAS;RALB;RALA;ERAS
	7	39730073	A	RALA	+	ENST00000005257	69	T	Family-wise	PER2	adj-p=3.13e-11;logp=-10.50;OR=21.52(95%C.I.=10.32-Inf)	3537.para.2	RRAS2;RRAS;MRAS;NRAS;KRAS;HRAS;RALB;RALA;ERAS
	7	39730074	G	RALA	+	ENST00000005257	70	A	Family-wise	PER2	adj-p=3.13e-11;logp=-10.50;OR=21.52(95%C.I.=10.32-Inf)	3537.para.2	RRAS2;RRAS;MRAS;NRAS;KRAS;HRAS;RALB;RALA;ERAS
	7	39730075	C	RALA	+	ENST00000005257	70	A	Family-wise	PER2	adj-p=3.13e-11;logp=-10.50;OR=21.52(95%C.I.=10.32-Inf)	3537.para.2	RRAS2;RRAS;MRAS;NRAS;KRAS;HRAS;RALB;RALA;ERAS
	7	39730076	T	RALA	+	ENST00000005257	70	A	Family-wise	PER2	adj-p=3.13e-11;logp=-10.50;OR=21.52(95%C.I.=10.32-Inf)	3537.para.2	RRAS2;RRAS;MRAS;NRAS;KRAS;HRAS;RALB;RALA;ERAS
	7	39730077	G	RALA	+	ENST00000005257	71	G	Family-wise	PER2	adj-p=3.13e-11;logp=-10.50;OR=21.52(95%C.I.=10.32-Inf)	3537.para.2	RRAS2;RRAS;MRAS;NRAS;KRAS;HRAS;RALB;RALA;ERAS
	7	39730078	G	RALA	+	ENST00000005257	71	G	Family-wise	PER2	adj-p=3.13e-11;logp=-10.50;OR=21.52(95%C.I.=10.32-Inf)	3537.para.2	RRAS2;RRAS;MRAS;NRAS;KRAS;HRAS;RALB;RALA;ERAS
	7	39730079	G	RALA	+	ENST00000005257	71	G	Family-wise	PER2	adj-p=3.13e-11;logp=-10.50;OR=21.52(95%C.I.=10.32-Inf)	3537.para.2	RRAS2;RRAS;MRAS;NRAS;KRAS;HRAS;RALB;RALA;ERAS
	7	39730080	C	RALA	+	ENST00000005257	72	Q	Family-wise	PER2	adj-p=3.13e-11;logp=-10.50;OR=21.52(95%C.I.=10.32-Inf)	3537.para.2	RRAS2;RRAS;MRAS;NRAS;KRAS;HRAS;RALB;RALA;ERAS
	7	39730081	A	RALA	+	ENST00000005257	72	Q	Family-wise	PER2	adj-p=3.13e-11;logp=-10.50;OR=21.52(95%C.I.=10.32-Inf)	3537.para.2	RRAS2;RRAS;MRAS;NRAS;KRAS;HRAS;RALB;RALA;ERAS
	7	39730082	G	RALA	+	ENST00000005257	72	Q	Family-wise	PER2	adj-p=3.13e-11;logp=-10.50;OR=21.52(95%C.I.=10.32-Inf)	3537.para.2	RRAS2;RRAS;MRAS;NRAS;KRAS;HRAS;RALB;RALA;ERAS
	7	39730083	G	RALA	+	ENST00000005257	73	E	Family-wise	PER2	adj-p=1.24e-10;logp=-9.91;OR=16.35(95%C.I.=8.35-Inf)	3537.para.2	RRAS2;RRAS;MRAS;NRAS;KRAS;HRAS;RALB;RALA;ERAS
	7	39730084	A	RALA	+	ENST00000005257	73	E	Family-wise	PER2	adj-p=1.24e-10;logp=-9.91;OR=16.35(95%C.I.=8.35-Inf)	3537.para.2	RRAS2;RRAS;MRAS;NRAS;KRAS;HRAS;RALB;RALA;ERAS
	7	39730085	G	RALA	+	ENST00000005257	73	E	Family-wise	PER2	adj-p=1.24e-10;logp=-9.91;OR=16.35(95%C.I.=8.35-Inf)	3537.para.2	RRAS2;RRAS;MRAS;NRAS;KRAS;HRAS;RALB;RALA;ERAS
	7	39730086	G	RALA	+	ENST00000005257	74	D	Family-wise	PER2	adj-p=1.24e-10;logp=-9.91;OR=16.35(95%C.I.=8.35-Inf)	3537.para.2	RRAS2;RRAS;MRAS;NRAS;KRAS;HRAS;RALB;RALA;ERAS
	7	39730087	A	RALA	+	ENST00000005257	74	D	Family-wise	PER2	adj-p=1.24e-10;logp=-9.91;OR=16.35(95%C.I.=8.35-Inf)	3537.para.2	RRAS2;RRAS;MRAS;NRAS;KRAS;HRAS;RALB;RALA;ERAS
	7	39730088	C	RALA	+	ENST00000005257	74	D	Family-wise	PER2	adj-p=1.24e-10;logp=-9.91;OR=16.35(95%C.I.=8.35-Inf)	3537.para.2	RRAS2;RRAS;MRAS;NRAS;KRAS;HRAS;RALB;RALA;ERAS
	7	39730089	T	RALA	+	ENST00000005257	75	Y	Family-wise	PER2	adj-p=1.24e-10;logp=-9.91;OR=16.35(95%C.I.=8.35-Inf)	3537.para.2	RRAS2;RRAS;MRAS;NRAS;KRAS;HRAS;RALB;RALA;ERAS
	7	39730090	A	RALA	+	ENST00000005257	75	Y	Family-wise	PER2	adj-p=1.24e-10;logp=-9.91;OR=16.35(95%C.I.=8.35-Inf)	3537.para.2	RRAS2;RRAS;MRAS;NRAS;KRAS;HRAS;RALB;RALA;ERAS
	7	39730091	C	RALA	+	ENST00000005257	75	Y	Family-wise	PER2	adj-p=1.24e-10;logp=-9.91;OR=16.35(95%C.I.=8.35-Inf)	3537.para.2	RRAS2;RRAS;MRAS;NRAS;KRAS;HRAS;RALB;RALA;ERAS
	7	39730092	G	RALA	+	ENST00000005257	76	A	Family-wise	PER2	adj-p=1.24e-10;logp=-9.91;OR=16.35(95%C.I.=8.35-Inf)	3537.para.2	RRAS2;RRAS;MRAS;NRAS;KRAS;HRAS;RALB;RALA;ERAS
	7	39730093	C	RALA	+	ENST00000005257	76	A	Family-wise	PER2	adj-p=1.24e-10;logp=-9.91;OR=16.35(95%C.I.=8.35-Inf)	3537.para.2	RRAS2;RRAS;MRAS;NRAS;KRAS;HRAS;RALB;RALA;ERAS
	7	39730094	T	RALA	+	ENST00000005257	76	A	Family-wise	PER2	adj-p=1.24e-10;logp=-9.91;OR=16.35(95%C.I.=8.35-Inf)	3537.para.2	RRAS2;RRAS;MRAS;NRAS;KRAS;HRAS;RALB;RALA;ERAS
	7	39730095	G	RALA	+	ENST00000005257	77	A	Family-wise	PER2	adj-p=1.24e-10;logp=-9.91;OR=16.35(95%C.I.=8.35-Inf)	3537.para.2	RRAS2;RRAS;MRAS;NRAS;KRAS;HRAS;RALB;RALA;ERAS
	7	39730096	C	RALA	+	ENST00000005257	77	A	Family-wise	PER2	adj-p=1.24e-10;logp=-9.91;OR=16.35(95%C.I.=8.35-Inf)	3537.para.2	RRAS2;RRAS;MRAS;NRAS;KRAS;HRAS;RALB;RALA;ERAS
	7	39730097	A	RALA	+	ENST00000005257	77	A	Family-wise	PER2	adj-p=1.24e-10;logp=-9.91;OR=16.35(95%C.I.=8.35-Inf)	3537.para.2	RRAS2;RRAS;MRAS;NRAS;KRAS;HRAS;RALB;RALA;ERAS
	17	39506854	C	KRT33A	-	ENST00000007735	56	E	Family-wise	PER1	adj-p=1.41e-22;logp=-21.85;OR=30.08(95%C.I.=19.02-Inf)	1898.para.1	KRT15;KRT13;KRT14;KRT16;KRT17;KRT19;KRT10;KRT12;KRT24;KRT27;KRT25;KRT28;KRT26;KRT33B;KRT31;KRT33A;KRT34;KRT35;KRT32;KRT36;KRT40;KRT38;KRT37;KRT39
	17	39506853	T	KRT33A	-	ENST00000007735	56	E	Family-wise	PER1	adj-p=1.41e-22;logp=-21.85;OR=30.08(95%C.I.=19.02-Inf)	1898.para.1	KRT15;KRT13;KRT14;KRT16;KRT17;KRT19;KRT10;KRT12;KRT24;KRT27;KRT25;KRT28;KRT26;KRT33B;KRT31;KRT33A;KRT34;KRT35;KRT32;KRT36;KRT40;KRT38;KRT37;KRT39
	17	39506852	C	KRT33A	-	ENST00000007735	56	E	Family-wise	PER1	adj-p=1.41e-22;logp=-21.85;OR=30.08(95%C.I.=19.02-Inf)	1898.para.1	KRT15;KRT13;KRT14;KRT16;KRT17;KRT19;KRT10;KRT12;KRT24;KRT27;KRT25;KRT28;KRT26;KRT33B;KRT31;KRT33A;KRT34;KRT35;KRT32;KRT36;KRT40;KRT38;KRT37;KRT39
	17	39506851	T	KRT33A	-	ENST00000007735	57	K	Family-wise	PER1	adj-p=1.41e-22;logp=-21.85;OR=30.08(95%C.I.=19.02-Inf)	1898.para.1	KRT15;KRT13;KRT14;KRT16;KRT17;KRT19;KRT10;KRT12;KRT24;KRT27;KRT25;KRT28;KRT26;KRT33B;KRT31;KRT33A;KRT34;KRT35;KRT32;KRT36;KRT40;KRT38;KRT37;KRT39
	17	39506850	T	KRT33A	-	ENST00000007735	57	K	Family-wise	PER1	adj-p=1.41e-22;logp=-21.85;OR=30.08(95%C.I.=19.02-Inf)	1898.para.1	KRT15;KRT13;KRT14;KRT16;KRT17;KRT19;KRT10;KRT12;KRT24;KRT27;KRT25;KRT28;KRT26;KRT33B;KRT31;KRT33A;KRT34;KRT35;KRT32;KRT36;KRT40;KRT38;KRT37;KRT39
	17	39506849	C	KRT33A	-	ENST00000007735	57	K	Family-wise	PER1	adj-p=1.41e-22;logp=-21.85;OR=30.08(95%C.I.=19.02-Inf)	1898.para.1	KRT15;KRT13;KRT14;KRT16;KRT17;KRT19;KRT10;KRT12;KRT24;KRT27;KRT25;KRT28;KRT26;KRT33B;KRT31;KRT33A;KRT34;KRT35;KRT32;KRT36;KRT40;KRT38;KRT37;KRT39
	17	39506848	C	KRT33A	-	ENST00000007735	58	E	Family-wise	PER1	adj-p=1.41e-22;logp=-21.85;OR=30.08(95%C.I.=19.02-Inf)	1898.para.1	KRT15;KRT13;KRT14;KRT16;KRT17;KRT19;KRT10;KRT12;KRT24;KRT27;KRT25;KRT28;KRT26;KRT33B;KRT31;KRT33A;KRT34;KRT35;KRT32;KRT36;KRT40;KRT38;KRT37;KRT39
	17	39506847	T	KRT33A	-	ENST00000007735	58	E	Family-wise	PER1	adj-p=1.41e-22;logp=-21.85;OR=30.08(95%C.I.=19.02-Inf)	1898.para.1	KRT15;KRT13;KRT14;KRT16;KRT17;KRT19;KRT10;KRT12;KRT24;KRT27;KRT25;KRT28;KRT26;KRT33B;KRT31;KRT33A;KRT34;KRT35;KRT32;KRT36;KRT40;KRT38;KRT37;KRT39
	17	39506846	C	KRT33A	-	ENST00000007735	58	E	Family-wise	PER1	adj-p=1.41e-22;logp=-21.85;OR=30.08(95%C.I.=19.02-Inf)	1898.para.1	KRT15;KRT13;KRT14;KRT16;KRT17;KRT19;KRT10;KRT12;KRT24;KRT27;KRT25;KRT28;KRT26;KRT33B;KRT31;KRT33A;KRT34;KRT35;KRT32;KRT36;KRT40;KRT38;KRT37;KRT39
	17	39506845	T	KRT33A	-	ENST00000007735	59	T	Family-wise	PER1	adj-p=1.41e-22;logp=-21.85;OR=30.08(95%C.I.=19.02-Inf)	1898.para.1	KRT15;KRT13;KRT14;KRT16;KRT17;KRT19;KRT10;KRT12;KRT24;KRT27;KRT25;KRT28;KRT26;KRT33B;KRT31;KRT33A;KRT34;KRT35;KRT32;KRT36;KRT40;KRT38;KRT37;KRT39
	17	39506844	G	KRT33A	-	ENST00000007735	59	T	Family-wise	PER1	adj-p=1.41e-22;logp=-21.85;OR=30.08(95%C.I.=19.02-Inf)	1898.para.1	KRT15;KRT13;KRT14;KRT16;KRT17;KRT19;KRT10;KRT12;KRT24;KRT27;KRT25;KRT28;KRT26;KRT33B;KRT31;KRT33A;KRT34;KRT35;KRT32;KRT36;KRT40;KRT38;KRT37;KRT39
	17	39506843	G	KRT33A	-	ENST00000007735	59	T	Family-wise	PER1	adj-p=1.41e-22;logp=-21.85;OR=30.08(95%C.I.=19.02-Inf)	1898.para.1	KRT15;KRT13;KRT14;KRT16;KRT17;KRT19;KRT10;KRT12;KRT24;KRT27;KRT25;KRT28;KRT26;KRT33B;KRT31;KRT33A;KRT34;KRT35;KRT32;KRT36;KRT40;KRT38;KRT37;KRT39
	17	39506842	T	KRT33A	-	ENST00000007735	60	M	Family-wise	PER1	adj-p=1.41e-22;logp=-21.85;OR=30.08(95%C.I.=19.02-Inf)	1898.para.1	KRT15;KRT13;KRT14;KRT16;KRT17;KRT19;KRT10;KRT12;KRT24;KRT27;KRT25;KRT28;KRT26;KRT33B;KRT31;KRT33A;KRT34;KRT35;KRT32;KRT36;KRT40;KRT38;KRT37;KRT39
	17	39506841	A	KRT33A	-	ENST00000007735	60	M	Family-wise	PER1	adj-p=1.41e-22;logp=-21.85;OR=30.08(95%C.I.=19.02-Inf)	1898.para.1	KRT15;KRT13;KRT14;KRT16;KRT17;KRT19;KRT10;KRT12;KRT24;KRT27;KRT25;KRT28;KRT26;KRT33B;KRT31;KRT33A;KRT34;KRT35;KRT32;KRT36;KRT40;KRT38;KRT37;KRT39
	17	39506840	C	KRT33A	-	ENST00000007735	60	M	Family-wise	PER1	adj-p=1.41e-22;logp=-21.85;OR=30.08(95%C.I.=19.02-Inf)	1898.para.1	KRT15;KRT13;KRT14;KRT16;KRT17;KRT19;KRT10;KRT12;KRT24;KRT27;KRT25;KRT28;KRT26;KRT33B;KRT31;KRT33A;KRT34;KRT35;KRT32;KRT36;KRT40;KRT38;KRT37;KRT39
	17	39506839	G	KRT33A	-	ENST00000007735	61	Q	Family-wise	PER1	adj-p=3.74e-30;logp=-29.43;OR=36.67(95%C.I.=24.02-Inf)	1898.para.1	KRT15;KRT13;KRT14;KRT16;KRT17;KRT19;KRT10;KRT12;KRT24;KRT27;KRT25;KRT28;KRT26;KRT33B;KRT31;KRT33A;KRT34;KRT35;KRT32;KRT36;KRT40;KRT38;KRT37;KRT39
	17	39506838	T	KRT33A	-	ENST00000007735	61	Q	Family-wise	PER1	adj-p=3.74e-30;logp=-29.43;OR=36.67(95%C.I.=24.02-Inf)	1898.para.1	KRT15;KRT13;KRT14;KRT16;KRT17;KRT19;KRT10;KRT12;KRT24;KRT27;KRT25;KRT28;KRT26;KRT33B;KRT31;KRT33A;KRT34;KRT35;KRT32;KRT36;KRT40;KRT38;KRT37;KRT39
	17	39506837	C	KRT33A	-	ENST00000007735	61	Q	Family-wise	PER1	adj-p=3.74e-30;logp=-29.43;OR=36.67(95%C.I.=24.02-Inf)	1898.para.1	KRT15;KRT13;KRT14;KRT16;KRT17;KRT19;KRT10;KRT12;KRT24;KRT27;KRT25;KRT28;KRT26;KRT33B;KRT31;KRT33A;KRT34;KRT35;KRT32;KRT36;KRT40;KRT38;KRT37;KRT39
	17	39506836	A	KRT33A	-	ENST00000007735	62	F	Family-wise	PER1	adj-p=3.74e-30;logp=-29.43;OR=36.67(95%C.I.=24.02-Inf)	1898.para.1	KRT15;KRT13;KRT14;KRT16;KRT17;KRT19;KRT10;KRT12;KRT24;KRT27;KRT25;KRT28;KRT26;KRT33B;KRT31;KRT33A;KRT34;KRT35;KRT32;KRT36;KRT40;KRT38;KRT37;KRT39
	17	39506835	A	KRT33A	-	ENST00000007735	62	F	Family-wise	PER1	adj-p=3.74e-30;logp=-29.43;OR=36.67(95%C.I.=24.02-Inf)	1898.para.1	KRT15;KRT13;KRT14;KRT16;KRT17;KRT19;KRT10;KRT12;KRT24;KRT27;KRT25;KRT28;KRT26;KRT33B;KRT31;KRT33A;KRT34;KRT35;KRT32;KRT36;KRT40;KRT38;KRT37;KRT39
	17	39506834	G	KRT33A	-	ENST00000007735	62	F	Family-wise	PER1	adj-p=3.74e-30;logp=-29.43;OR=36.67(95%C.I.=24.02-Inf)	1898.para.1	KRT15;KRT13;KRT14;KRT16;KRT17;KRT19;KRT10;KRT12;KRT24;KRT27;KRT25;KRT28;KRT26;KRT33B;KRT31;KRT33A;KRT34;KRT35;KRT32;KRT36;KRT40;KRT38;KRT37;KRT39
	17	39506833	G	KRT33A	-	ENST00000007735	63	L	Family-wise	PER1	adj-p=3.74e-30;logp=-29.43;OR=36.67(95%C.I.=24.02-Inf)	1898.para.1	KRT15;KRT13;KRT14;KRT16;KRT17;KRT19;KRT10;KRT12;KRT24;KRT27;KRT25;KRT28;KRT26;KRT33B;KRT31;KRT33A;KRT34;KRT35;KRT32;KRT36;KRT40;KRT38;KRT37;KRT39
	17	39506832	A	KRT33A	-	ENST00000007735	63	L	Family-wise	PER1	adj-p=3.74e-30;logp=-29.43;OR=36.67(95%C.I.=24.02-Inf)	1898.para.1	KRT15;KRT13;KRT14;KRT16;KRT17;KRT19;KRT10;KRT12;KRT24;KRT27;KRT25;KRT28;KRT26;KRT33B;KRT31;KRT33A;KRT34;KRT35;KRT32;KRT36;KRT40;KRT38;KRT37;KRT39
	17	39506831	C	KRT33A	-	ENST00000007735	63	L	Family-wise	PER1	adj-p=3.74e-30;logp=-29.43;OR=36.67(95%C.I.=24.02-Inf)	1898.para.1	KRT15;KRT13;KRT14;KRT16;KRT17;KRT19;KRT10;KRT12;KRT24;KRT27;KRT25;KRT28;KRT26;KRT33B;KRT31;KRT33A;KRT34;KRT35;KRT32;KRT36;KRT40;KRT38;KRT37;KRT39
	17	39506830	T	KRT33A	-	ENST00000007735	64	N	Family-wise	PER1	adj-p=3.74e-30;logp=-29.43;OR=36.67(95%C.I.=24.02-Inf)	1898.para.1	KRT15;KRT13;KRT14;KRT16;KRT17;KRT19;KRT10;KRT12;KRT24;KRT27;KRT25;KRT28;KRT26;KRT33B;KRT31;KRT33A;KRT34;KRT35;KRT32;KRT36;KRT40;KRT38;KRT37;KRT39
	17	39506829	T	KRT33A	-	ENST00000007735	64	N	Family-wise	PER1	adj-p=3.74e-30;logp=-29.43;OR=36.67(95%C.I.=24.02-Inf)	1898.para.1	KRT15;KRT13;KRT14;KRT16;KRT17;KRT19;KRT10;KRT12;KRT24;KRT27;KRT25;KRT28;KRT26;KRT33B;KRT31;KRT33A;KRT34;KRT35;KRT32;KRT36;KRT40;KRT38;KRT37;KRT39
	17	39506828	G	KRT33A	-	ENST00000007735	64	N	Family-wise	PER1	adj-p=3.74e-30;logp=-29.43;OR=36.67(95%C.I.=24.02-Inf)	1898.para.1	KRT15;KRT13;KRT14;KRT16;KRT17;KRT19;KRT10;KRT12;KRT24;KRT27;KRT25;KRT28;KRT26;KRT33B;KRT31;KRT33A;KRT34;KRT35;KRT32;KRT36;KRT40;KRT38;KRT37;KRT39
	17	39506827	C	KRT33A	-	ENST00000007735	65	D	Family-wise	PER1	adj-p=3.74e-30;logp=-29.43;OR=36.67(95%C.I.=24.02-Inf)	1898.para.1	KRT15;KRT13;KRT14;KRT16;KRT17;KRT19;KRT10;KRT12;KRT24;KRT27;KRT25;KRT28;KRT26;KRT33B;KRT31;KRT33A;KRT34;KRT35;KRT32;KRT36;KRT40;KRT38;KRT37;KRT39
	17	39506826	T	KRT33A	-	ENST00000007735	65	D	Family-wise	PER1	adj-p=3.74e-30;logp=-29.43;OR=36.67(95%C.I.=24.02-Inf)	1898.para.1	KRT15;KRT13;KRT14;KRT16;KRT17;KRT19;KRT10;KRT12;KRT24;KRT27;KRT25;KRT28;KRT26;KRT33B;KRT31;KRT33A;KRT34;KRT35;KRT32;KRT36;KRT40;KRT38;KRT37;KRT39
	17	39506825	G	KRT33A	-	ENST00000007735	65	D	Family-wise	PER1	adj-p=3.74e-30;logp=-29.43;OR=36.67(95%C.I.=24.02-Inf)	1898.para.1	KRT15;KRT13;KRT14;KRT16;KRT17;KRT19;KRT10;KRT12;KRT24;KRT27;KRT25;KRT28;KRT26;KRT33B;KRT31;KRT33A;KRT34;KRT35;KRT32;KRT36;KRT40;KRT38;KRT37;KRT39
	17	39506824	G	KRT33A	-	ENST00000007735	66	R	Family-wise	PER1	adj-p=1.28e-27;logp=-26.89;OR=38.07(95%C.I.=24.42-Inf)	1898.para.1	KRT15;KRT13;KRT14;KRT16;KRT17;KRT19;KRT10;KRT12;KRT24;KRT27;KRT25;KRT28;KRT26;KRT33B;KRT31;KRT33A;KRT34;KRT35;KRT32;KRT36;KRT40;KRT38;KRT37;KRT39
	17	39506823	C	KRT33A	-	ENST00000007735	66	R	Family-wise	PER1	adj-p=1.28e-27;logp=-26.89;OR=38.07(95%C.I.=24.42-Inf)	1898.para.1	KRT15;KRT13;KRT14;KRT16;KRT17;KRT19;KRT10;KRT12;KRT24;KRT27;KRT25;KRT28;KRT26;KRT33B;KRT31;KRT33A;KRT34;KRT35;KRT32;KRT36;KRT40;KRT38;KRT37;KRT39
	17	39506822	G	KRT33A	-	ENST00000007735	66	R	Family-wise	PER1	adj-p=1.28e-27;logp=-26.89;OR=38.07(95%C.I.=24.42-Inf)	1898.para.1	KRT15;KRT13;KRT14;KRT16;KRT17;KRT19;KRT10;KRT12;KRT24;KRT27;KRT25;KRT28;KRT26;KRT33B;KRT31;KRT33A;KRT34;KRT35;KRT32;KRT36;KRT40;KRT38;KRT37;KRT39
	17	39506821	G	KRT33A	-	ENST00000007735	67	L	Family-wise	PER1	adj-p=1.28e-27;logp=-26.89;OR=38.07(95%C.I.=24.42-Inf)	1898.para.1	KRT15;KRT13;KRT14;KRT16;KRT17;KRT19;KRT10;KRT12;KRT24;KRT27;KRT25;KRT28;KRT26;KRT33B;KRT31;KRT33A;KRT34;KRT35;KRT32;KRT36;KRT40;KRT38;KRT37;KRT39
	17	39506820	A	KRT33A	-	ENST00000007735	67	L	Family-wise	PER1	adj-p=1.28e-27;logp=-26.89;OR=38.07(95%C.I.=24.42-Inf)	1898.para.1	KRT15;KRT13;KRT14;KRT16;KRT17;KRT19;KRT10;KRT12;KRT24;KRT27;KRT25;KRT28;KRT26;KRT33B;KRT31;KRT33A;KRT34;KRT35;KRT32;KRT36;KRT40;KRT38;KRT37;KRT39
	17	39506819	C	KRT33A	-	ENST00000007735	67	L	Family-wise	PER1	adj-p=1.28e-27;logp=-26.89;OR=38.07(95%C.I.=24.42-Inf)	1898.para.1	KRT15;KRT13;KRT14;KRT16;KRT17;KRT19;KRT10;KRT12;KRT24;KRT27;KRT25;KRT28;KRT26;KRT33B;KRT31;KRT33A;KRT34;KRT35;KRT32;KRT36;KRT40;KRT38;KRT37;KRT39
	17	39506818	C	KRT33A	-	ENST00000007735	68	A	Family-wise	PER1	adj-p=1.28e-27;logp=-26.89;OR=38.07(95%C.I.=24.42-Inf)	1898.para.1	KRT15;KRT13;KRT14;KRT16;KRT17;KRT19;KRT10;KRT12;KRT24;KRT27;KRT25;KRT28;KRT26;KRT33B;KRT31;KRT33A;KRT34;KRT35;KRT32;KRT36;KRT40;KRT38;KRT37;KRT39
	17	39506817	G	KRT33A	-	ENST00000007735	68	A	Family-wise	PER1	adj-p=1.28e-27;logp=-26.89;OR=38.07(95%C.I.=24.42-Inf)	1898.para.1	KRT15;KRT13;KRT14;KRT16;KRT17;KRT19;KRT10;KRT12;KRT24;KRT27;KRT25;KRT28;KRT26;KRT33B;KRT31;KRT33A;KRT34;KRT35;KRT32;KRT36;KRT40;KRT38;KRT37;KRT39
	17	39506816	G	KRT33A	-	ENST00000007735	68	A	Family-wise	PER1	adj-p=1.28e-27;logp=-26.89;OR=38.07(95%C.I.=24.42-Inf)	1898.para.1	KRT15;KRT13;KRT14;KRT16;KRT17;KRT19;KRT10;KRT12;KRT24;KRT27;KRT25;KRT28;KRT26;KRT33B;KRT31;KRT33A;KRT34;KRT35;KRT32;KRT36;KRT40;KRT38;KRT37;KRT39
	17	39506815	T	KRT33A	-	ENST00000007735	69	S	Family-wise	PER1	adj-p=1.28e-27;logp=-26.89;OR=38.07(95%C.I.=24.42-Inf)	1898.para.1	KRT15;KRT13;KRT14;KRT16;KRT17;KRT19;KRT10;KRT12;KRT24;KRT27;KRT25;KRT28;KRT26;KRT33B;KRT31;KRT33A;KRT34;KRT35;KRT32;KRT36;KRT40;KRT38;KRT37;KRT39
	17	39506814	C	KRT33A	-	ENST00000007735	69	S	Family-wise	PER1	adj-p=1.28e-27;logp=-26.89;OR=38.07(95%C.I.=24.42-Inf)	1898.para.1	KRT15;KRT13;KRT14;KRT16;KRT17;KRT19;KRT10;KRT12;KRT24;KRT27;KRT25;KRT28;KRT26;KRT33B;KRT31;KRT33A;KRT34;KRT35;KRT32;KRT36;KRT40;KRT38;KRT37;KRT39
	17	39506813	G	KRT33A	-	ENST00000007735	69	S	Family-wise	PER1	adj-p=1.28e-27;logp=-26.89;OR=38.07(95%C.I.=24.42-Inf)	1898.para.1	KRT15;KRT13;KRT14;KRT16;KRT17;KRT19;KRT10;KRT12;KRT24;KRT27;KRT25;KRT28;KRT26;KRT33B;KRT31;KRT33A;KRT34;KRT35;KRT32;KRT36;KRT40;KRT38;KRT37;KRT39
	17	39506812	A	KRT33A	-	ENST00000007735	70	Y	Family-wise	PER1	adj-p=1.28e-27;logp=-26.89;OR=38.07(95%C.I.=24.42-Inf)	1898.para.1	KRT15;KRT13;KRT14;KRT16;KRT17;KRT19;KRT10;KRT12;KRT24;KRT27;KRT25;KRT28;KRT26;KRT33B;KRT31;KRT33A;KRT34;KRT35;KRT32;KRT36;KRT40;KRT38;KRT37;KRT39
	17	39506811	T	KRT33A	-	ENST00000007735	70	Y	Family-wise	PER1	adj-p=1.28e-27;logp=-26.89;OR=38.07(95%C.I.=24.42-Inf)	1898.para.1	KRT15;KRT13;KRT14;KRT16;KRT17;KRT19;KRT10;KRT12;KRT24;KRT27;KRT25;KRT28;KRT26;KRT33B;KRT31;KRT33A;KRT34;KRT35;KRT32;KRT36;KRT40;KRT38;KRT37;KRT39
	17	39506810	G	KRT33A	-	ENST00000007735	70	Y	Family-wise	PER1	adj-p=1.28e-27;logp=-26.89;OR=38.07(95%C.I.=24.42-Inf)	1898.para.1	KRT15;KRT13;KRT14;KRT16;KRT17;KRT19;KRT10;KRT12;KRT24;KRT27;KRT25;KRT28;KRT26;KRT33B;KRT31;KRT33A;KRT34;KRT35;KRT32;KRT36;KRT40;KRT38;KRT37;KRT39
	17	39506809	G	KRT33A	-	ENST00000007735	71	L	Family-wise	PER1	adj-p=1.28e-27;logp=-26.89;OR=38.07(95%C.I.=24.42-Inf)	1898.para.1	KRT15;KRT13;KRT14;KRT16;KRT17;KRT19;KRT10;KRT12;KRT24;KRT27;KRT25;KRT28;KRT26;KRT33B;KRT31;KRT33A;KRT34;KRT35;KRT32;KRT36;KRT40;KRT38;KRT37;KRT39
	17	39506808	A	KRT33A	-	ENST00000007735	71	L	Family-wise	PER1	adj-p=1.28e-27;logp=-26.89;OR=38.07(95%C.I.=24.42-Inf)	1898.para.1	KRT15;KRT13;KRT14;KRT16;KRT17;KRT19;KRT10;KRT12;KRT24;KRT27;KRT25;KRT28;KRT26;KRT33B;KRT31;KRT33A;KRT34;KRT35;KRT32;KRT36;KRT40;KRT38;KRT37;KRT39
	17	39506807	C	KRT33A	-	ENST00000007735	71	L	Family-wise	PER1	adj-p=1.28e-27;logp=-26.89;OR=38.07(95%C.I.=24.42-Inf)	1898.para.1	KRT15;KRT13;KRT14;KRT16;KRT17;KRT19;KRT10;KRT12;KRT24;KRT27;KRT25;KRT28;KRT26;KRT33B;KRT31;KRT33A;KRT34;KRT35;KRT32;KRT36;KRT40;KRT38;KRT37;KRT39
	17	39506806	C	KRT33A	-	ENST00000007735	72	E	Family-wise	PER1	adj-p=1.28e-27;logp=-26.89;OR=38.07(95%C.I.=24.42-Inf)	1898.para.1	KRT15;KRT13;KRT14;KRT16;KRT17;KRT19;KRT10;KRT12;KRT24;KRT27;KRT25;KRT28;KRT26;KRT33B;KRT31;KRT33A;KRT34;KRT35;KRT32;KRT36;KRT40;KRT38;KRT37;KRT39
	17	39506805	T	KRT33A	-	ENST00000007735	72	E	Family-wise	PER1	adj-p=1.28e-27;logp=-26.89;OR=38.07(95%C.I.=24.42-Inf)	1898.para.1	KRT15;KRT13;KRT14;KRT16;KRT17;KRT19;KRT10;KRT12;KRT24;KRT27;KRT25;KRT28;KRT26;KRT33B;KRT31;KRT33A;KRT34;KRT35;KRT32;KRT36;KRT40;KRT38;KRT37;KRT39
	17	39506804	C	KRT33A	-	ENST00000007735	72	E	Family-wise	PER1	adj-p=1.28e-27;logp=-26.89;OR=38.07(95%C.I.=24.42-Inf)	1898.para.1	KRT15;KRT13;KRT14;KRT16;KRT17;KRT19;KRT10;KRT12;KRT24;KRT27;KRT25;KRT28;KRT26;KRT33B;KRT31;KRT33A;KRT34;KRT35;KRT32;KRT36;KRT40;KRT38;KRT37;KRT39
	17	39506803	T	KRT33A	-	ENST00000007735	73	K	Family-wise	PER1	adj-p=1.28e-27;logp=-26.89;OR=38.07(95%C.I.=24.42-Inf)	1898.para.1	KRT15;KRT13;KRT14;KRT16;KRT17;KRT19;KRT10;KRT12;KRT24;KRT27;KRT25;KRT28;KRT26;KRT33B;KRT31;KRT33A;KRT34;KRT35;KRT32;KRT36;KRT40;KRT38;KRT37;KRT39
	17	39506802	T	KRT33A	-	ENST00000007735	73	K	Family-wise	PER1	adj-p=1.28e-27;logp=-26.89;OR=38.07(95%C.I.=24.42-Inf)	1898.para.1	KRT15;KRT13;KRT14;KRT16;KRT17;KRT19;KRT10;KRT12;KRT24;KRT27;KRT25;KRT28;KRT26;KRT33B;KRT31;KRT33A;KRT34;KRT35;KRT32;KRT36;KRT40;KRT38;KRT37;KRT39
	17	39506801	C	KRT33A	-	ENST00000007735	73	K	Family-wise	PER1	adj-p=1.28e-27;logp=-26.89;OR=38.07(95%C.I.=24.42-Inf)	1898.para.1	KRT15;KRT13;KRT14;KRT16;KRT17;KRT19;KRT10;KRT12;KRT24;KRT27;KRT25;KRT28;KRT26;KRT33B;KRT31;KRT33A;KRT34;KRT35;KRT32;KRT36;KRT40;KRT38;KRT37;KRT39
	17	39506800	C	KRT33A	-	ENST00000007735	74	V	Family-wise	PER1	adj-p=1.28e-27;logp=-26.89;OR=38.07(95%C.I.=24.42-Inf)	1898.para.1	KRT15;KRT13;KRT14;KRT16;KRT17;KRT19;KRT10;KRT12;KRT24;KRT27;KRT25;KRT28;KRT26;KRT33B;KRT31;KRT33A;KRT34;KRT35;KRT32;KRT36;KRT40;KRT38;KRT37;KRT39
	17	39506799	A	KRT33A	-	ENST00000007735	74	V	Family-wise	PER1	adj-p=1.28e-27;logp=-26.89;OR=38.07(95%C.I.=24.42-Inf)	1898.para.1	KRT15;KRT13;KRT14;KRT16;KRT17;KRT19;KRT10;KRT12;KRT24;KRT27;KRT25;KRT28;KRT26;KRT33B;KRT31;KRT33A;KRT34;KRT35;KRT32;KRT36;KRT40;KRT38;KRT37;KRT39
	17	39506798	C	KRT33A	-	ENST00000007735	74	V	Family-wise	PER1	adj-p=1.28e-27;logp=-26.89;OR=38.07(95%C.I.=24.42-Inf)	1898.para.1	KRT15;KRT13;KRT14;KRT16;KRT17;KRT19;KRT10;KRT12;KRT24;KRT27;KRT25;KRT28;KRT26;KRT33B;KRT31;KRT33A;KRT34;KRT35;KRT32;KRT36;KRT40;KRT38;KRT37;KRT39
	17	39506797	G	KRT33A	-	ENST00000007735	75	R	Family-wise	PER1	adj-p=2.09e-08;logp=-7.68;OR=13.69(95%C.I.=7.60-Inf)	1898.para.1	KRT15;KRT13;KRT14;KRT16;KRT17;KRT19;KRT10;KRT12;KRT24;KRT27;KRT25;KRT28;KRT26;KRT33B;KRT31;KRT33A;KRT34;KRT35;KRT32;KRT36;KRT40;KRT38;KRT37;KRT39
	17	39506796	C	KRT33A	-	ENST00000007735	75	R	Family-wise	PER1	adj-p=2.09e-08;logp=-7.68;OR=13.69(95%C.I.=7.60-Inf)	1898.para.1	KRT15;KRT13;KRT14;KRT16;KRT17;KRT19;KRT10;KRT12;KRT24;KRT27;KRT25;KRT28;KRT26;KRT33B;KRT31;KRT33A;KRT34;KRT35;KRT32;KRT36;KRT40;KRT38;KRT37;KRT39
	17	39506795	A	KRT33A	-	ENST00000007735	75	R	Family-wise	PER1	adj-p=2.09e-08;logp=-7.68;OR=13.69(95%C.I.=7.60-Inf)	1898.para.1	KRT15;KRT13;KRT14;KRT16;KRT17;KRT19;KRT10;KRT12;KRT24;KRT27;KRT25;KRT28;KRT26;KRT33B;KRT31;KRT33A;KRT34;KRT35;KRT32;KRT36;KRT40;KRT38;KRT37;KRT39
	17	39506794	G	KRT33A	-	ENST00000007735	76	Q	Family-wise	PER1	adj-p=2.09e-08;logp=-7.68;OR=13.69(95%C.I.=7.60-Inf)	1898.para.1	KRT15;KRT13;KRT14;KRT16;KRT17;KRT19;KRT10;KRT12;KRT24;KRT27;KRT25;KRT28;KRT26;KRT33B;KRT31;KRT33A;KRT34;KRT35;KRT32;KRT36;KRT40;KRT38;KRT37;KRT39
	17	39506793	T	KRT33A	-	ENST00000007735	76	Q	Family-wise	PER1	adj-p=2.09e-08;logp=-7.68;OR=13.69(95%C.I.=7.60-Inf)	1898.para.1	KRT15;KRT13;KRT14;KRT16;KRT17;KRT19;KRT10;KRT12;KRT24;KRT27;KRT25;KRT28;KRT26;KRT33B;KRT31;KRT33A;KRT34;KRT35;KRT32;KRT36;KRT40;KRT38;KRT37;KRT39
	17	39506792	C	KRT33A	-	ENST00000007735	76	Q	Family-wise	PER1	adj-p=2.09e-08;logp=-7.68;OR=13.69(95%C.I.=7.60-Inf)	1898.para.1	KRT15;KRT13;KRT14;KRT16;KRT17;KRT19;KRT10;KRT12;KRT24;KRT27;KRT25;KRT28;KRT26;KRT33B;KRT31;KRT33A;KRT34;KRT35;KRT32;KRT36;KRT40;KRT38;KRT37;KRT39
	17	39506791	G	KRT33A	-	ENST00000007735	77	L	Family-wise	PER1	adj-p=2.09e-08;logp=-7.68;OR=13.69(95%C.I.=7.60-Inf)	1898.para.1	KRT15;KRT13;KRT14;KRT16;KRT17;KRT19;KRT10;KRT12;KRT24;KRT27;KRT25;KRT28;KRT26;KRT33B;KRT31;KRT33A;KRT34;KRT35;KRT32;KRT36;KRT40;KRT38;KRT37;KRT39
	17	39506790	A	KRT33A	-	ENST00000007735	77	L	Family-wise	PER1	adj-p=2.09e-08;logp=-7.68;OR=13.69(95%C.I.=7.60-Inf)	1898.para.1	KRT15;KRT13;KRT14;KRT16;KRT17;KRT19;KRT10;KRT12;KRT24;KRT27;KRT25;KRT28;KRT26;KRT33B;KRT31;KRT33A;KRT34;KRT35;KRT32;KRT36;KRT40;KRT38;KRT37;KRT39
	17	39506789	C	KRT33A	-	ENST00000007735	77	L	Family-wise	PER1	adj-p=2.09e-08;logp=-7.68;OR=13.69(95%C.I.=7.60-Inf)	1898.para.1	KRT15;KRT13;KRT14;KRT16;KRT17;KRT19;KRT10;KRT12;KRT24;KRT27;KRT25;KRT28;KRT26;KRT33B;KRT31;KRT33A;KRT34;KRT35;KRT32;KRT36;KRT40;KRT38;KRT37;KRT39
	17	39506788	C	KRT33A	-	ENST00000007735	78	E	Family-wise	PER1	adj-p=2.09e-08;logp=-7.68;OR=13.69(95%C.I.=7.60-Inf)	1898.para.1	KRT15;KRT13;KRT14;KRT16;KRT17;KRT19;KRT10;KRT12;KRT24;KRT27;KRT25;KRT28;KRT26;KRT33B;KRT31;KRT33A;KRT34;KRT35;KRT32;KRT36;KRT40;KRT38;KRT37;KRT39
	17	39506787	T	KRT33A	-	ENST00000007735	78	E	Family-wise	PER1	adj-p=2.09e-08;logp=-7.68;OR=13.69(95%C.I.=7.60-Inf)	1898.para.1	KRT15;KRT13;KRT14;KRT16;KRT17;KRT19;KRT10;KRT12;KRT24;KRT27;KRT25;KRT28;KRT26;KRT33B;KRT31;KRT33A;KRT34;KRT35;KRT32;KRT36;KRT40;KRT38;KRT37;KRT39
	17	39506786	C	KRT33A	-	ENST00000007735	78	E	Family-wise	PER1	adj-p=2.09e-08;logp=-7.68;OR=13.69(95%C.I.=7.60-Inf)	1898.para.1	KRT15;KRT13;KRT14;KRT16;KRT17;KRT19;KRT10;KRT12;KRT24;KRT27;KRT25;KRT28;KRT26;KRT33B;KRT31;KRT33A;KRT34;KRT35;KRT32;KRT36;KRT40;KRT38;KRT37;KRT39
	17	39506785	G	KRT33A	-	ENST00000007735	79	R	Family-wise	PER1	adj-p=2.09e-08;logp=-7.68;OR=13.69(95%C.I.=7.60-Inf)	1898.para.1	KRT15;KRT13;KRT14;KRT16;KRT17;KRT19;KRT10;KRT12;KRT24;KRT27;KRT25;KRT28;KRT26;KRT33B;KRT31;KRT33A;KRT34;KRT35;KRT32;KRT36;KRT40;KRT38;KRT37;KRT39
	17	39506784	C	KRT33A	-	ENST00000007735	79	R	Family-wise	PER1	adj-p=2.09e-08;logp=-7.68;OR=13.69(95%C.I.=7.60-Inf)	1898.para.1	KRT15;KRT13;KRT14;KRT16;KRT17;KRT19;KRT10;KRT12;KRT24;KRT27;KRT25;KRT28;KRT26;KRT33B;KRT31;KRT33A;KRT34;KRT35;KRT32;KRT36;KRT40;KRT38;KRT37;KRT39
	17	39506783	C	KRT33A	-	ENST00000007735	79	R	Family-wise	PER1	adj-p=2.09e-08;logp=-7.68;OR=13.69(95%C.I.=7.60-Inf)	1898.para.1	KRT15;KRT13;KRT14;KRT16;KRT17;KRT19;KRT10;KRT12;KRT24;KRT27;KRT25;KRT28;KRT26;KRT33B;KRT31;KRT33A;KRT34;KRT35;KRT32;KRT36;KRT40;KRT38;KRT37;KRT39
	17	39502773	G	KRT33A	-	ENST00000007735	342	L	Family-wise	PER2	adj-p=8.39e-04;logp=-3.08;OR=7.84(95%C.I.=3.89-Inf)	1898.para.1	KRT15;KRT13;KRT14;KRT16;KRT17;KRT19;KRT10;KRT12;KRT24;KRT27;KRT25;KRT28;KRT26;KRT33B;KRT31;KRT33A;KRT34;KRT35;KRT32;KRT36;KRT40;KRT38;KRT37;KRT39
	17	39502772	A	KRT33A	-	ENST00000007735	342	L	Family-wise	PER2	adj-p=8.39e-04;logp=-3.08;OR=7.84(95%C.I.=3.89-Inf)	1898.para.1	KRT15;KRT13;KRT14;KRT16;KRT17;KRT19;KRT10;KRT12;KRT24;KRT27;KRT25;KRT28;KRT26;KRT33B;KRT31;KRT33A;KRT34;KRT35;KRT32;KRT36;KRT40;KRT38;KRT37;KRT39
	17	39502771	C	KRT33A	-	ENST00000007735	342	L	Family-wise	PER2	adj-p=8.39e-04;logp=-3.08;OR=7.84(95%C.I.=3.89-Inf)	1898.para.1	KRT15;KRT13;KRT14;KRT16;KRT17;KRT19;KRT10;KRT12;KRT24;KRT27;KRT25;KRT28;KRT26;KRT33B;KRT31;KRT33A;KRT34;KRT35;KRT32;KRT36;KRT40;KRT38;KRT37;KRT39
	17	39502770	G	KRT33A	-	ENST00000007735	343	L	Family-wise	PER2	adj-p=8.39e-04;logp=-3.08;OR=7.84(95%C.I.=3.89-Inf)	1898.para.1	KRT15;KRT13;KRT14;KRT16;KRT17;KRT19;KRT10;KRT12;KRT24;KRT27;KRT25;KRT28;KRT26;KRT33B;KRT31;KRT33A;KRT34;KRT35;KRT32;KRT36;KRT40;KRT38;KRT37;KRT39
	17	39502769	A	KRT33A	-	ENST00000007735	343	L	Family-wise	PER2	adj-p=8.39e-04;logp=-3.08;OR=7.84(95%C.I.=3.89-Inf)	1898.para.1	KRT15;KRT13;KRT14;KRT16;KRT17;KRT19;KRT10;KRT12;KRT24;KRT27;KRT25;KRT28;KRT26;KRT33B;KRT31;KRT33A;KRT34;KRT35;KRT32;KRT36;KRT40;KRT38;KRT37;KRT39
	17	39502768	C	KRT33A	-	ENST00000007735	343	L	Family-wise	PER2	adj-p=8.39e-04;logp=-3.08;OR=7.84(95%C.I.=3.89-Inf)	1898.para.1	KRT15;KRT13;KRT14;KRT16;KRT17;KRT19;KRT10;KRT12;KRT24;KRT27;KRT25;KRT28;KRT26;KRT33B;KRT31;KRT33A;KRT34;KRT35;KRT32;KRT36;KRT40;KRT38;KRT37;KRT39
	17	39502767	C	KRT33A	-	ENST00000007735	344	D	Family-wise	PER2	adj-p=8.39e-04;logp=-3.08;OR=7.84(95%C.I.=3.89-Inf)	1898.para.1	KRT15;KRT13;KRT14;KRT16;KRT17;KRT19;KRT10;KRT12;KRT24;KRT27;KRT25;KRT28;KRT26;KRT33B;KRT31;KRT33A;KRT34;KRT35;KRT32;KRT36;KRT40;KRT38;KRT37;KRT39
	17	39502766	T	KRT33A	-	ENST00000007735	344	D	Family-wise	PER2	adj-p=8.39e-04;logp=-3.08;OR=7.84(95%C.I.=3.89-Inf)	1898.para.1	KRT15;KRT13;KRT14;KRT16;KRT17;KRT19;KRT10;KRT12;KRT24;KRT27;KRT25;KRT28;KRT26;KRT33B;KRT31;KRT33A;KRT34;KRT35;KRT32;KRT36;KRT40;KRT38;KRT37;KRT39
	17	39502765	G	KRT33A	-	ENST00000007735	344	D	Family-wise	PER2	adj-p=8.39e-04;logp=-3.08;OR=7.84(95%C.I.=3.89-Inf)	1898.para.1	KRT15;KRT13;KRT14;KRT16;KRT17;KRT19;KRT10;KRT12;KRT24;KRT27;KRT25;KRT28;KRT26;KRT33B;KRT31;KRT33A;KRT34;KRT35;KRT32;KRT36;KRT40;KRT38;KRT37;KRT39
	17	39502764	C	KRT33A	-	ENST00000007735	345	V	Family-wise	PER2	adj-p=8.39e-04;logp=-3.08;OR=7.84(95%C.I.=3.89-Inf)	1898.para.1	KRT15;KRT13;KRT14;KRT16;KRT17;KRT19;KRT10;KRT12;KRT24;KRT27;KRT25;KRT28;KRT26;KRT33B;KRT31;KRT33A;KRT34;KRT35;KRT32;KRT36;KRT40;KRT38;KRT37;KRT39
	17	39502763	A	KRT33A	-	ENST00000007735	345	V	Family-wise	PER2	adj-p=8.39e-04;logp=-3.08;OR=7.84(95%C.I.=3.89-Inf)	1898.para.1	KRT15;KRT13;KRT14;KRT16;KRT17;KRT19;KRT10;KRT12;KRT24;KRT27;KRT25;KRT28;KRT26;KRT33B;KRT31;KRT33A;KRT34;KRT35;KRT32;KRT36;KRT40;KRT38;KRT37;KRT39
	17	39502762	C	KRT33A	-	ENST00000007735	345	V	Family-wise	PER2	adj-p=8.39e-04;logp=-3.08;OR=7.84(95%C.I.=3.89-Inf)	1898.para.1	KRT15;KRT13;KRT14;KRT16;KRT17;KRT19;KRT10;KRT12;KRT24;KRT27;KRT25;KRT28;KRT26;KRT33B;KRT31;KRT33A;KRT34;KRT35;KRT32;KRT36;KRT40;KRT38;KRT37;KRT39
	17	39502761	G	KRT33A	-	ENST00000007735	346	R	Family-wise	PER2	adj-p=8.39e-04;logp=-3.08;OR=7.84(95%C.I.=3.89-Inf)	1898.para.1	KRT15;KRT13;KRT14;KRT16;KRT17;KRT19;KRT10;KRT12;KRT24;KRT27;KRT25;KRT28;KRT26;KRT33B;KRT31;KRT33A;KRT34;KRT35;KRT32;KRT36;KRT40;KRT38;KRT37;KRT39
	17	39502760	C	KRT33A	-	ENST00000007735	346	R	Family-wise	PER2	adj-p=8.39e-04;logp=-3.08;OR=7.84(95%C.I.=3.89-Inf)	1898.para.1	KRT15;KRT13;KRT14;KRT16;KRT17;KRT19;KRT10;KRT12;KRT24;KRT27;KRT25;KRT28;KRT26;KRT33B;KRT31;KRT33A;KRT34;KRT35;KRT32;KRT36;KRT40;KRT38;KRT37;KRT39
	17	39502759	C	KRT33A	-	ENST00000007735	346	R	Family-wise	PER2	adj-p=8.39e-04;logp=-3.08;OR=7.84(95%C.I.=3.89-Inf)	1898.para.1	KRT15;KRT13;KRT14;KRT16;KRT17;KRT19;KRT10;KRT12;KRT24;KRT27;KRT25;KRT28;KRT26;KRT33B;KRT31;KRT33A;KRT34;KRT35;KRT32;KRT36;KRT40;KRT38;KRT37;KRT39
	17	39502758	C	KRT33A	-	ENST00000007735	347	A	Family-wise	PER2	adj-p=6.12e-06;logp=-5.21;OR=10.45(95%C.I.=5.54-Inf)	1898.para.1	KRT15;KRT13;KRT14;KRT16;KRT17;KRT19;KRT10;KRT12;KRT24;KRT27;KRT25;KRT28;KRT26;KRT33B;KRT31;KRT33A;KRT34;KRT35;KRT32;KRT36;KRT40;KRT38;KRT37;KRT39
	17	39502757	G	KRT33A	-	ENST00000007735	347	A	Family-wise	PER2	adj-p=6.12e-06;logp=-5.21;OR=10.45(95%C.I.=5.54-Inf)	1898.para.1	KRT15;KRT13;KRT14;KRT16;KRT17;KRT19;KRT10;KRT12;KRT24;KRT27;KRT25;KRT28;KRT26;KRT33B;KRT31;KRT33A;KRT34;KRT35;KRT32;KRT36;KRT40;KRT38;KRT37;KRT39
	17	39502756	C	KRT33A	-	ENST00000007735	347	A	Family-wise	PER2	adj-p=6.12e-06;logp=-5.21;OR=10.45(95%C.I.=5.54-Inf)	1898.para.1	KRT15;KRT13;KRT14;KRT16;KRT17;KRT19;KRT10;KRT12;KRT24;KRT27;KRT25;KRT28;KRT26;KRT33B;KRT31;KRT33A;KRT34;KRT35;KRT32;KRT36;KRT40;KRT38;KRT37;KRT39
	17	39502755	G	KRT33A	-	ENST00000007735	348	R	Family-wise	PER2	adj-p=6.12e-06;logp=-5.21;OR=10.45(95%C.I.=5.54-Inf)	1898.para.1	KRT15;KRT13;KRT14;KRT16;KRT17;KRT19;KRT10;KRT12;KRT24;KRT27;KRT25;KRT28;KRT26;KRT33B;KRT31;KRT33A;KRT34;KRT35;KRT32;KRT36;KRT40;KRT38;KRT37;KRT39
	17	39502754	C	KRT33A	-	ENST00000007735	348	R	Family-wise	PER2	adj-p=6.12e-06;logp=-5.21;OR=10.45(95%C.I.=5.54-Inf)	1898.para.1	KRT15;KRT13;KRT14;KRT16;KRT17;KRT19;KRT10;KRT12;KRT24;KRT27;KRT25;KRT28;KRT26;KRT33B;KRT31;KRT33A;KRT34;KRT35;KRT32;KRT36;KRT40;KRT38;KRT37;KRT39
	17	39502753	C	KRT33A	-	ENST00000007735	348	R	Family-wise	PER2	adj-p=6.12e-06;logp=-5.21;OR=10.45(95%C.I.=5.54-Inf)	1898.para.1	KRT15;KRT13;KRT14;KRT16;KRT17;KRT19;KRT10;KRT12;KRT24;KRT27;KRT25;KRT28;KRT26;KRT33B;KRT31;KRT33A;KRT34;KRT35;KRT32;KRT36;KRT40;KRT38;KRT37;KRT39
	17	39502752	G	KRT33A	-	ENST00000007735	349	L	Family-wise	PER2	adj-p=6.12e-06;logp=-5.21;OR=10.45(95%C.I.=5.54-Inf)	1898.para.1	KRT15;KRT13;KRT14;KRT16;KRT17;KRT19;KRT10;KRT12;KRT24;KRT27;KRT25;KRT28;KRT26;KRT33B;KRT31;KRT33A;KRT34;KRT35;KRT32;KRT36;KRT40;KRT38;KRT37;KRT39
	17	39502751	A	KRT33A	-	ENST00000007735	349	L	Family-wise	PER2	adj-p=6.12e-06;logp=-5.21;OR=10.45(95%C.I.=5.54-Inf)	1898.para.1	KRT15;KRT13;KRT14;KRT16;KRT17;KRT19;KRT10;KRT12;KRT24;KRT27;KRT25;KRT28;KRT26;KRT33B;KRT31;KRT33A;KRT34;KRT35;KRT32;KRT36;KRT40;KRT38;KRT37;KRT39
	17	39502750	C	KRT33A	-	ENST00000007735	349	L	Family-wise	PER2	adj-p=6.12e-06;logp=-5.21;OR=10.45(95%C.I.=5.54-Inf)	1898.para.1	KRT15;KRT13;KRT14;KRT16;KRT17;KRT19;KRT10;KRT12;KRT24;KRT27;KRT25;KRT28;KRT26;KRT33B;KRT31;KRT33A;KRT34;KRT35;KRT32;KRT36;KRT40;KRT38;KRT37;KRT39
	17	39502749	C	KRT33A	-	ENST00000007735	350	E	Family-wise	PER2	adj-p=6.12e-06;logp=-5.21;OR=10.45(95%C.I.=5.54-Inf)	1898.para.1	KRT15;KRT13;KRT14;KRT16;KRT17;KRT19;KRT10;KRT12;KRT24;KRT27;KRT25;KRT28;KRT26;KRT33B;KRT31;KRT33A;KRT34;KRT35;KRT32;KRT36;KRT40;KRT38;KRT37;KRT39
	17	39502748	T	KRT33A	-	ENST00000007735	350	E	Family-wise	PER2	adj-p=6.12e-06;logp=-5.21;OR=10.45(95%C.I.=5.54-Inf)	1898.para.1	KRT15;KRT13;KRT14;KRT16;KRT17;KRT19;KRT10;KRT12;KRT24;KRT27;KRT25;KRT28;KRT26;KRT33B;KRT31;KRT33A;KRT34;KRT35;KRT32;KRT36;KRT40;KRT38;KRT37;KRT39
	17	39502747	C	KRT33A	-	ENST00000007735	350	E	Family-wise	PER2	adj-p=6.12e-06;logp=-5.21;OR=10.45(95%C.I.=5.54-Inf)	1898.para.1	KRT15;KRT13;KRT14;KRT16;KRT17;KRT19;KRT10;KRT12;KRT24;KRT27;KRT25;KRT28;KRT26;KRT33B;KRT31;KRT33A;KRT34;KRT35;KRT32;KRT36;KRT40;KRT38;KRT37;KRT39
	17	39502746	A	KRT33A	-	ENST00000007735	351	C	Family-wise	PER2	adj-p=6.12e-06;logp=-5.21;OR=10.45(95%C.I.=5.54-Inf)	1898.para.1	KRT15;KRT13;KRT14;KRT16;KRT17;KRT19;KRT10;KRT12;KRT24;KRT27;KRT25;KRT28;KRT26;KRT33B;KRT31;KRT33A;KRT34;KRT35;KRT32;KRT36;KRT40;KRT38;KRT37;KRT39
	17	39502745	C	KRT33A	-	ENST00000007735	351	C	Family-wise	PER2	adj-p=6.12e-06;logp=-5.21;OR=10.45(95%C.I.=5.54-Inf)	1898.para.1	KRT15;KRT13;KRT14;KRT16;KRT17;KRT19;KRT10;KRT12;KRT24;KRT27;KRT25;KRT28;KRT26;KRT33B;KRT31;KRT33A;KRT34;KRT35;KRT32;KRT36;KRT40;KRT38;KRT37;KRT39
	17	39502744	A	KRT33A	-	ENST00000007735	351	C	Family-wise	PER2	adj-p=6.12e-06;logp=-5.21;OR=10.45(95%C.I.=5.54-Inf)	1898.para.1	KRT15;KRT13;KRT14;KRT16;KRT17;KRT19;KRT10;KRT12;KRT24;KRT27;KRT25;KRT28;KRT26;KRT33B;KRT31;KRT33A;KRT34;KRT35;KRT32;KRT36;KRT40;KRT38;KRT37;KRT39
	17	39502743	C	KRT33A	-	ENST00000007735	352	E	Family-wise	PER2	adj-p=4.93e-20;logp=-19.31;OR=27.57(95%C.I.=17.16-Inf)	1898.para.1	KRT15;KRT13;KRT14;KRT16;KRT17;KRT19;KRT10;KRT12;KRT24;KRT27;KRT25;KRT28;KRT26;KRT33B;KRT31;KRT33A;KRT34;KRT35;KRT32;KRT36;KRT40;KRT38;KRT37;KRT39
	17	39502742	T	KRT33A	-	ENST00000007735	352	E	Family-wise	PER2	adj-p=4.93e-20;logp=-19.31;OR=27.57(95%C.I.=17.16-Inf)	1898.para.1	KRT15;KRT13;KRT14;KRT16;KRT17;KRT19;KRT10;KRT12;KRT24;KRT27;KRT25;KRT28;KRT26;KRT33B;KRT31;KRT33A;KRT34;KRT35;KRT32;KRT36;KRT40;KRT38;KRT37;KRT39
	17	39502741	C	KRT33A	-	ENST00000007735	352	E	Family-wise	PER2	adj-p=4.93e-20;logp=-19.31;OR=27.57(95%C.I.=17.16-Inf)	1898.para.1	KRT15;KRT13;KRT14;KRT16;KRT17;KRT19;KRT10;KRT12;KRT24;KRT27;KRT25;KRT28;KRT26;KRT33B;KRT31;KRT33A;KRT34;KRT35;KRT32;KRT36;KRT40;KRT38;KRT37;KRT39
	17	39502740	T	KRT33A	-	ENST00000007735	353	I	Family-wise	PER2	adj-p=4.93e-20;logp=-19.31;OR=27.57(95%C.I.=17.16-Inf)	1898.para.1	KRT15;KRT13;KRT14;KRT16;KRT17;KRT19;KRT10;KRT12;KRT24;KRT27;KRT25;KRT28;KRT26;KRT33B;KRT31;KRT33A;KRT34;KRT35;KRT32;KRT36;KRT40;KRT38;KRT37;KRT39
	17	39502739	A	KRT33A	-	ENST00000007735	353	I	Family-wise	PER2	adj-p=4.93e-20;logp=-19.31;OR=27.57(95%C.I.=17.16-Inf)	1898.para.1	KRT15;KRT13;KRT14;KRT16;KRT17;KRT19;KRT10;KRT12;KRT24;KRT27;KRT25;KRT28;KRT26;KRT33B;KRT31;KRT33A;KRT34;KRT35;KRT32;KRT36;KRT40;KRT38;KRT37;KRT39
	17	39502738	G	KRT33A	-	ENST00000007735	353	I	Family-wise	PER2	adj-p=4.93e-20;logp=-19.31;OR=27.57(95%C.I.=17.16-Inf)	1898.para.1	KRT15;KRT13;KRT14;KRT16;KRT17;KRT19;KRT10;KRT12;KRT24;KRT27;KRT25;KRT28;KRT26;KRT33B;KRT31;KRT33A;KRT34;KRT35;KRT32;KRT36;KRT40;KRT38;KRT37;KRT39
	17	39502737	T	KRT33A	-	ENST00000007735	354	N	Family-wise	PER2	adj-p=4.93e-20;logp=-19.31;OR=27.57(95%C.I.=17.16-Inf)	1898.para.1	KRT15;KRT13;KRT14;KRT16;KRT17;KRT19;KRT10;KRT12;KRT24;KRT27;KRT25;KRT28;KRT26;KRT33B;KRT31;KRT33A;KRT34;KRT35;KRT32;KRT36;KRT40;KRT38;KRT37;KRT39
	17	39502736	T	KRT33A	-	ENST00000007735	354	N	Family-wise	PER2	adj-p=4.93e-20;logp=-19.31;OR=27.57(95%C.I.=17.16-Inf)	1898.para.1	KRT15;KRT13;KRT14;KRT16;KRT17;KRT19;KRT10;KRT12;KRT24;KRT27;KRT25;KRT28;KRT26;KRT33B;KRT31;KRT33A;KRT34;KRT35;KRT32;KRT36;KRT40;KRT38;KRT37;KRT39
	17	39502735	G	KRT33A	-	ENST00000007735	354	N	Family-wise	PER2	adj-p=4.93e-20;logp=-19.31;OR=27.57(95%C.I.=17.16-Inf)	1898.para.1	KRT15;KRT13;KRT14;KRT16;KRT17;KRT19;KRT10;KRT12;KRT24;KRT27;KRT25;KRT28;KRT26;KRT33B;KRT31;KRT33A;KRT34;KRT35;KRT32;KRT36;KRT40;KRT38;KRT37;KRT39
	17	39502734	T	KRT33A	-	ENST00000007735	355	T	Family-wise	PER2	adj-p=4.93e-20;logp=-19.31;OR=27.57(95%C.I.=17.16-Inf)	1898.para.1	KRT15;KRT13;KRT14;KRT16;KRT17;KRT19;KRT10;KRT12;KRT24;KRT27;KRT25;KRT28;KRT26;KRT33B;KRT31;KRT33A;KRT34;KRT35;KRT32;KRT36;KRT40;KRT38;KRT37;KRT39
	17	39502733	G	KRT33A	-	ENST00000007735	355	T	Family-wise	PER2	adj-p=4.93e-20;logp=-19.31;OR=27.57(95%C.I.=17.16-Inf)	1898.para.1	KRT15;KRT13;KRT14;KRT16;KRT17;KRT19;KRT10;KRT12;KRT24;KRT27;KRT25;KRT28;KRT26;KRT33B;KRT31;KRT33A;KRT34;KRT35;KRT32;KRT36;KRT40;KRT38;KRT37;KRT39
	17	39502732	C	KRT33A	-	ENST00000007735	355	T	Family-wise	PER2	adj-p=4.93e-20;logp=-19.31;OR=27.57(95%C.I.=17.16-Inf)	1898.para.1	KRT15;KRT13;KRT14;KRT16;KRT17;KRT19;KRT10;KRT12;KRT24;KRT27;KRT25;KRT28;KRT26;KRT33B;KRT31;KRT33A;KRT34;KRT35;KRT32;KRT36;KRT40;KRT38;KRT37;KRT39
	17	39502731	A	KRT33A	-	ENST00000007735	356	Y	Family-wise	PER2	adj-p=4.93e-20;logp=-19.31;OR=27.57(95%C.I.=17.16-Inf)	1898.para.1	KRT15;KRT13;KRT14;KRT16;KRT17;KRT19;KRT10;KRT12;KRT24;KRT27;KRT25;KRT28;KRT26;KRT33B;KRT31;KRT33A;KRT34;KRT35;KRT32;KRT36;KRT40;KRT38;KRT37;KRT39
	17	39502730	T	KRT33A	-	ENST00000007735	356	Y	Family-wise	PER2	adj-p=4.93e-20;logp=-19.31;OR=27.57(95%C.I.=17.16-Inf)	1898.para.1	KRT15;KRT13;KRT14;KRT16;KRT17;KRT19;KRT10;KRT12;KRT24;KRT27;KRT25;KRT28;KRT26;KRT33B;KRT31;KRT33A;KRT34;KRT35;KRT32;KRT36;KRT40;KRT38;KRT37;KRT39
	17	39502729	G	KRT33A	-	ENST00000007735	356	Y	Family-wise	PER2	adj-p=4.93e-20;logp=-19.31;OR=27.57(95%C.I.=17.16-Inf)	1898.para.1	KRT15;KRT13;KRT14;KRT16;KRT17;KRT19;KRT10;KRT12;KRT24;KRT27;KRT25;KRT28;KRT26;KRT33B;KRT31;KRT33A;KRT34;KRT35;KRT32;KRT36;KRT40;KRT38;KRT37;KRT39
	17	39502728	G	KRT33A	-	ENST00000007735	357	R	Family-wise	PER2	adj-p=4.93e-20;logp=-19.31;OR=27.57(95%C.I.=17.16-Inf)	1898.para.1	KRT15;KRT13;KRT14;KRT16;KRT17;KRT19;KRT10;KRT12;KRT24;KRT27;KRT25;KRT28;KRT26;KRT33B;KRT31;KRT33A;KRT34;KRT35;KRT32;KRT36;KRT40;KRT38;KRT37;KRT39
	17	39502727	C	KRT33A	-	ENST00000007735	357	R	Family-wise	PER2	adj-p=4.93e-20;logp=-19.31;OR=27.57(95%C.I.=17.16-Inf)	1898.para.1	KRT15;KRT13;KRT14;KRT16;KRT17;KRT19;KRT10;KRT12;KRT24;KRT27;KRT25;KRT28;KRT26;KRT33B;KRT31;KRT33A;KRT34;KRT35;KRT32;KRT36;KRT40;KRT38;KRT37;KRT39
	17	39502726	C	KRT33A	-	ENST00000007735	357	R	Family-wise	PER2	adj-p=4.93e-20;logp=-19.31;OR=27.57(95%C.I.=17.16-Inf)	1898.para.1	KRT15;KRT13;KRT14;KRT16;KRT17;KRT19;KRT10;KRT12;KRT24;KRT27;KRT25;KRT28;KRT26;KRT33B;KRT31;KRT33A;KRT34;KRT35;KRT32;KRT36;KRT40;KRT38;KRT37;KRT39
	17	39502725	T	KRT33A	-	ENST00000007735	358	S	Family-wise	PER2	adj-p=4.93e-20;logp=-19.31;OR=27.57(95%C.I.=17.16-Inf)	1898.para.1	KRT15;KRT13;KRT14;KRT16;KRT17;KRT19;KRT10;KRT12;KRT24;KRT27;KRT25;KRT28;KRT26;KRT33B;KRT31;KRT33A;KRT34;KRT35;KRT32;KRT36;KRT40;KRT38;KRT37;KRT39
	17	39502724	C	KRT33A	-	ENST00000007735	358	S	Family-wise	PER2	adj-p=4.93e-20;logp=-19.31;OR=27.57(95%C.I.=17.16-Inf)	1898.para.1	KRT15;KRT13;KRT14;KRT16;KRT17;KRT19;KRT10;KRT12;KRT24;KRT27;KRT25;KRT28;KRT26;KRT33B;KRT31;KRT33A;KRT34;KRT35;KRT32;KRT36;KRT40;KRT38;KRT37;KRT39
	17	39502723	G	KRT33A	-	ENST00000007735	358	S	Family-wise	PER2	adj-p=4.93e-20;logp=-19.31;OR=27.57(95%C.I.=17.16-Inf)	1898.para.1	KRT15;KRT13;KRT14;KRT16;KRT17;KRT19;KRT10;KRT12;KRT24;KRT27;KRT25;KRT28;KRT26;KRT33B;KRT31;KRT33A;KRT34;KRT35;KRT32;KRT36;KRT40;KRT38;KRT37;KRT39
	17	39502722	G	KRT33A	-	ENST00000007735	359	L	Family-wise	PER2	adj-p=4.93e-20;logp=-19.31;OR=27.57(95%C.I.=17.16-Inf)	1898.para.1	KRT15;KRT13;KRT14;KRT16;KRT17;KRT19;KRT10;KRT12;KRT24;KRT27;KRT25;KRT28;KRT26;KRT33B;KRT31;KRT33A;KRT34;KRT35;KRT32;KRT36;KRT40;KRT38;KRT37;KRT39
	17	39502721	A	KRT33A	-	ENST00000007735	359	L	Family-wise	PER2	adj-p=4.93e-20;logp=-19.31;OR=27.57(95%C.I.=17.16-Inf)	1898.para.1	KRT15;KRT13;KRT14;KRT16;KRT17;KRT19;KRT10;KRT12;KRT24;KRT27;KRT25;KRT28;KRT26;KRT33B;KRT31;KRT33A;KRT34;KRT35;KRT32;KRT36;KRT40;KRT38;KRT37;KRT39
	17	39502720	C	KRT33A	-	ENST00000007735	359	L	Family-wise	PER2	adj-p=4.93e-20;logp=-19.31;OR=27.57(95%C.I.=17.16-Inf)	1898.para.1	KRT15;KRT13;KRT14;KRT16;KRT17;KRT19;KRT10;KRT12;KRT24;KRT27;KRT25;KRT28;KRT26;KRT33B;KRT31;KRT33A;KRT34;KRT35;KRT32;KRT36;KRT40;KRT38;KRT37;KRT39
	17	39502719	G	KRT33A	-	ENST00000007735	360	L	Family-wise	PER2	adj-p=4.93e-20;logp=-19.31;OR=27.57(95%C.I.=17.16-Inf)	1898.para.1	KRT15;KRT13;KRT14;KRT16;KRT17;KRT19;KRT10;KRT12;KRT24;KRT27;KRT25;KRT28;KRT26;KRT33B;KRT31;KRT33A;KRT34;KRT35;KRT32;KRT36;KRT40;KRT38;KRT37;KRT39
	17	39502718	A	KRT33A	-	ENST00000007735	360	L	Family-wise	PER2	adj-p=4.93e-20;logp=-19.31;OR=27.57(95%C.I.=17.16-Inf)	1898.para.1	KRT15;KRT13;KRT14;KRT16;KRT17;KRT19;KRT10;KRT12;KRT24;KRT27;KRT25;KRT28;KRT26;KRT33B;KRT31;KRT33A;KRT34;KRT35;KRT32;KRT36;KRT40;KRT38;KRT37;KRT39
	17	39502717	C	KRT33A	-	ENST00000007735	360	L	Family-wise	PER2	adj-p=4.93e-20;logp=-19.31;OR=27.57(95%C.I.=17.16-Inf)	1898.para.1	KRT15;KRT13;KRT14;KRT16;KRT17;KRT19;KRT10;KRT12;KRT24;KRT27;KRT25;KRT28;KRT26;KRT33B;KRT31;KRT33A;KRT34;KRT35;KRT32;KRT36;KRT40;KRT38;KRT37;KRT39
	17	39502716	C	KRT33A	-	ENST00000007735	361	E	Family-wise	PER2	adj-p=4.31e-09;logp=-8.37;OR=13.71(95%C.I.=7.79-Inf)	1898.para.1	KRT15;KRT13;KRT14;KRT16;KRT17;KRT19;KRT10;KRT12;KRT24;KRT27;KRT25;KRT28;KRT26;KRT33B;KRT31;KRT33A;KRT34;KRT35;KRT32;KRT36;KRT40;KRT38;KRT37;KRT39
	17	39502715	T	KRT33A	-	ENST00000007735	361	E	Family-wise	PER2	adj-p=4.31e-09;logp=-8.37;OR=13.71(95%C.I.=7.79-Inf)	1898.para.1	KRT15;KRT13;KRT14;KRT16;KRT17;KRT19;KRT10;KRT12;KRT24;KRT27;KRT25;KRT28;KRT26;KRT33B;KRT31;KRT33A;KRT34;KRT35;KRT32;KRT36;KRT40;KRT38;KRT37;KRT39
	17	39502714	C	KRT33A	-	ENST00000007735	361	E	Family-wise	PER2	adj-p=4.31e-09;logp=-8.37;OR=13.71(95%C.I.=7.79-Inf)	1898.para.1	KRT15;KRT13;KRT14;KRT16;KRT17;KRT19;KRT10;KRT12;KRT24;KRT27;KRT25;KRT28;KRT26;KRT33B;KRT31;KRT33A;KRT34;KRT35;KRT32;KRT36;KRT40;KRT38;KRT37;KRT39
	17	39502713	T	KRT33A	-	ENST00000007735	362	S	Family-wise	PER2	adj-p=4.31e-09;logp=-8.37;OR=13.71(95%C.I.=7.79-Inf)	1898.para.1	KRT15;KRT13;KRT14;KRT16;KRT17;KRT19;KRT10;KRT12;KRT24;KRT27;KRT25;KRT28;KRT26;KRT33B;KRT31;KRT33A;KRT34;KRT35;KRT32;KRT36;KRT40;KRT38;KRT37;KRT39
	17	39502712	C	KRT33A	-	ENST00000007735	362	S	Family-wise	PER2	adj-p=4.31e-09;logp=-8.37;OR=13.71(95%C.I.=7.79-Inf)	1898.para.1	KRT15;KRT13;KRT14;KRT16;KRT17;KRT19;KRT10;KRT12;KRT24;KRT27;KRT25;KRT28;KRT26;KRT33B;KRT31;KRT33A;KRT34;KRT35;KRT32;KRT36;KRT40;KRT38;KRT37;KRT39
	17	39502711	G	KRT33A	-	ENST00000007735	362	S	Family-wise	PER2	adj-p=4.31e-09;logp=-8.37;OR=13.71(95%C.I.=7.79-Inf)	1898.para.1	KRT15;KRT13;KRT14;KRT16;KRT17;KRT19;KRT10;KRT12;KRT24;KRT27;KRT25;KRT28;KRT26;KRT33B;KRT31;KRT33A;KRT34;KRT35;KRT32;KRT36;KRT40;KRT38;KRT37;KRT39
	17	39502710	C	KRT33A	-	ENST00000007735	363	E	Family-wise	PER2	adj-p=4.31e-09;logp=-8.37;OR=13.71(95%C.I.=7.79-Inf)	1898.para.1	KRT15;KRT13;KRT14;KRT16;KRT17;KRT19;KRT10;KRT12;KRT24;KRT27;KRT25;KRT28;KRT26;KRT33B;KRT31;KRT33A;KRT34;KRT35;KRT32;KRT36;KRT40;KRT38;KRT37;KRT39
	17	39502709	T	KRT33A	-	ENST00000007735	363	E	Family-wise	PER2	adj-p=4.31e-09;logp=-8.37;OR=13.71(95%C.I.=7.79-Inf)	1898.para.1	KRT15;KRT13;KRT14;KRT16;KRT17;KRT19;KRT10;KRT12;KRT24;KRT27;KRT25;KRT28;KRT26;KRT33B;KRT31;KRT33A;KRT34;KRT35;KRT32;KRT36;KRT40;KRT38;KRT37;KRT39
	17	39502708	C	KRT33A	-	ENST00000007735	363	E	Family-wise	PER2	adj-p=4.31e-09;logp=-8.37;OR=13.71(95%C.I.=7.79-Inf)	1898.para.1	KRT15;KRT13;KRT14;KRT16;KRT17;KRT19;KRT10;KRT12;KRT24;KRT27;KRT25;KRT28;KRT26;KRT33B;KRT31;KRT33A;KRT34;KRT35;KRT32;KRT36;KRT40;KRT38;KRT37;KRT39
	17	39502707	C	KRT33A	-	ENST00000007735	364	D	Family-wise	PER2	adj-p=4.31e-09;logp=-8.37;OR=13.71(95%C.I.=7.79-Inf)	1898.para.1	KRT15;KRT13;KRT14;KRT16;KRT17;KRT19;KRT10;KRT12;KRT24;KRT27;KRT25;KRT28;KRT26;KRT33B;KRT31;KRT33A;KRT34;KRT35;KRT32;KRT36;KRT40;KRT38;KRT37;KRT39
	17	39502706	T	KRT33A	-	ENST00000007735	364	D	Family-wise	PER2	adj-p=4.31e-09;logp=-8.37;OR=13.71(95%C.I.=7.79-Inf)	1898.para.1	KRT15;KRT13;KRT14;KRT16;KRT17;KRT19;KRT10;KRT12;KRT24;KRT27;KRT25;KRT28;KRT26;KRT33B;KRT31;KRT33A;KRT34;KRT35;KRT32;KRT36;KRT40;KRT38;KRT37;KRT39
	17	39502705	G	KRT33A	-	ENST00000007735	364	D	Family-wise	PER2	adj-p=4.31e-09;logp=-8.37;OR=13.71(95%C.I.=7.79-Inf)	1898.para.1	KRT15;KRT13;KRT14;KRT16;KRT17;KRT19;KRT10;KRT12;KRT24;KRT27;KRT25;KRT28;KRT26;KRT33B;KRT31;KRT33A;KRT34;KRT35;KRT32;KRT36;KRT40;KRT38;KRT37;KRT39
	17	39502704	A	KRT33A	-	ENST00000007735	365	C	Family-wise	PER2	adj-p=4.31e-09;logp=-8.37;OR=13.71(95%C.I.=7.79-Inf)	1898.para.1	KRT15;KRT13;KRT14;KRT16;KRT17;KRT19;KRT10;KRT12;KRT24;KRT27;KRT25;KRT28;KRT26;KRT33B;KRT31;KRT33A;KRT34;KRT35;KRT32;KRT36;KRT40;KRT38;KRT37;KRT39
	17	39502703	C	KRT33A	-	ENST00000007735	365	C	Family-wise	PER2	adj-p=4.31e-09;logp=-8.37;OR=13.71(95%C.I.=7.79-Inf)	1898.para.1	KRT15;KRT13;KRT14;KRT16;KRT17;KRT19;KRT10;KRT12;KRT24;KRT27;KRT25;KRT28;KRT26;KRT33B;KRT31;KRT33A;KRT34;KRT35;KRT32;KRT36;KRT40;KRT38;KRT37;KRT39
	17	39502702	G	KRT33A	-	ENST00000007735	365	C	Family-wise	PER2	adj-p=4.31e-09;logp=-8.37;OR=13.71(95%C.I.=7.79-Inf)	1898.para.1	KRT15;KRT13;KRT14;KRT16;KRT17;KRT19;KRT10;KRT12;KRT24;KRT27;KRT25;KRT28;KRT26;KRT33B;KRT31;KRT33A;KRT34;KRT35;KRT32;KRT36;KRT40;KRT38;KRT37;KRT39
	6	50696607	T	TFAP2D	+	ENST00000008391	213	S	Family-wise	PER1	adj-p=6.54e-03;logp=-2.18;OR=28.41(95%C.I.=7.26-Inf)	1159.para.1	TFAP2A;TFAP2B;TFAP2E;TFAP2C;TFAP2D
	6	50696608	C	TFAP2D	+	ENST00000008391	213	S	Family-wise	PER1	adj-p=6.54e-03;logp=-2.18;OR=28.41(95%C.I.=7.26-Inf)	1159.para.1	TFAP2A;TFAP2B;TFAP2E;TFAP2C;TFAP2D
	6	50696609	T	TFAP2D	+	ENST00000008391	213	S	Family-wise	PER1	adj-p=6.54e-03;logp=-2.18;OR=28.41(95%C.I.=7.26-Inf)	1159.para.1	TFAP2A;TFAP2B;TFAP2E;TFAP2C;TFAP2D
	6	50696610	G	TFAP2D	+	ENST00000008391	214	V	Family-wise	PER1	adj-p=6.54e-03;logp=-2.18;OR=28.41(95%C.I.=7.26-Inf)	1159.para.1	TFAP2A;TFAP2B;TFAP2E;TFAP2C;TFAP2D
	6	50696611	T	TFAP2D	+	ENST00000008391	214	V	Family-wise	PER1	adj-p=6.54e-03;logp=-2.18;OR=28.41(95%C.I.=7.26-Inf)	1159.para.1	TFAP2A;TFAP2B;TFAP2E;TFAP2C;TFAP2D
	6	50696612	C	TFAP2D	+	ENST00000008391	214	V	Family-wise	PER1	adj-p=6.54e-03;logp=-2.18;OR=28.41(95%C.I.=7.26-Inf)	1159.para.1	TFAP2A;TFAP2B;TFAP2E;TFAP2C;TFAP2D
	6	50696613	C	TFAP2D	+	ENST00000008391	215	P	Family-wise	PER1	adj-p=6.54e-03;logp=-2.18;OR=28.41(95%C.I.=7.26-Inf)	1159.para.1	TFAP2A;TFAP2B;TFAP2E;TFAP2C;TFAP2D
	6	50696614	C	TFAP2D	+	ENST00000008391	215	P	Family-wise	PER1	adj-p=6.54e-03;logp=-2.18;OR=28.41(95%C.I.=7.26-Inf)	1159.para.1	TFAP2A;TFAP2B;TFAP2E;TFAP2C;TFAP2D
	6	50696615	T	TFAP2D	+	ENST00000008391	215	P	Family-wise	PER1	adj-p=6.54e-03;logp=-2.18;OR=28.41(95%C.I.=7.26-Inf)	1159.para.1	TFAP2A;TFAP2B;TFAP2E;TFAP2C;TFAP2D
	6	50696616	G	TFAP2D	+	ENST00000008391	216	G	Family-wise	PER1	adj-p=6.54e-03;logp=-2.18;OR=28.41(95%C.I.=7.26-Inf)	1159.para.1	TFAP2A;TFAP2B;TFAP2E;TFAP2C;TFAP2D
	6	50696617	G	TFAP2D	+	ENST00000008391	216	G	Family-wise	PER1	adj-p=6.54e-03;logp=-2.18;OR=28.41(95%C.I.=7.26-Inf)	1159.para.1	TFAP2A;TFAP2B;TFAP2E;TFAP2C;TFAP2D
	6	50696618	C	TFAP2D	+	ENST00000008391	216	G	Family-wise	PER1	adj-p=6.54e-03;logp=-2.18;OR=28.41(95%C.I.=7.26-Inf)	1159.para.1	TFAP2A;TFAP2B;TFAP2E;TFAP2C;TFAP2D
	6	50696619	C	TFAP2D	+	ENST00000008391	217	R	Family-wise	PER1	adj-p=6.54e-03;logp=-2.18;OR=28.41(95%C.I.=7.26-Inf)	1159.para.1	TFAP2A;TFAP2B;TFAP2E;TFAP2C;TFAP2D
	6	50696620	G	TFAP2D	+	ENST00000008391	217	R	Family-wise	PER1	adj-p=6.54e-03;logp=-2.18;OR=28.41(95%C.I.=7.26-Inf)	1159.para.1	TFAP2A;TFAP2B;TFAP2E;TFAP2C;TFAP2D
	6	50696621	T	TFAP2D	+	ENST00000008391	217	R	Family-wise	PER1	adj-p=6.54e-03;logp=-2.18;OR=28.41(95%C.I.=7.26-Inf)	1159.para.1	TFAP2A;TFAP2B;TFAP2E;TFAP2C;TFAP2D
	6	50696622	T	TFAP2D	+	ENST00000008391	218	L	Family-wise	PER1	adj-p=6.54e-03;logp=-2.18;OR=28.41(95%C.I.=7.26-Inf)	1159.para.1	TFAP2A;TFAP2B;TFAP2E;TFAP2C;TFAP2D
	6	50696623	T	TFAP2D	+	ENST00000008391	218	L	Family-wise	PER1	adj-p=6.54e-03;logp=-2.18;OR=28.41(95%C.I.=7.26-Inf)	1159.para.1	TFAP2A;TFAP2B;TFAP2E;TFAP2C;TFAP2D
	6	50696624	G	TFAP2D	+	ENST00000008391	218	L	Family-wise	PER1	adj-p=6.54e-03;logp=-2.18;OR=28.41(95%C.I.=7.26-Inf)	1159.para.1	TFAP2A;TFAP2B;TFAP2E;TFAP2C;TFAP2D
	6	50696625	T	TFAP2D	+	ENST00000008391	219	S	Family-wise	PER1	adj-p=6.54e-03;logp=-2.18;OR=28.41(95%C.I.=7.26-Inf)	1159.para.1	TFAP2A;TFAP2B;TFAP2E;TFAP2C;TFAP2D
	6	50696626	C	TFAP2D	+	ENST00000008391	219	S	Family-wise	PER1	adj-p=6.54e-03;logp=-2.18;OR=28.41(95%C.I.=7.26-Inf)	1159.para.1	TFAP2A;TFAP2B;TFAP2E;TFAP2C;TFAP2D
	6	50696627	C	TFAP2D	+	ENST00000008391	219	S	Family-wise	PER1	adj-p=6.54e-03;logp=-2.18;OR=28.41(95%C.I.=7.26-Inf)	1159.para.1	TFAP2A;TFAP2B;TFAP2E;TFAP2C;TFAP2D
	6	50696628	C	TFAP2D	+	ENST00000008391	220	L	Family-wise	PER1	adj-p=6.54e-03;logp=-2.18;OR=28.41(95%C.I.=7.26-Inf)	1159.para.1	TFAP2A;TFAP2B;TFAP2E;TFAP2C;TFAP2D
	6	50696629	T	TFAP2D	+	ENST00000008391	220	L	Family-wise	PER1	adj-p=6.54e-03;logp=-2.18;OR=28.41(95%C.I.=7.26-Inf)	1159.para.1	TFAP2A;TFAP2B;TFAP2E;TFAP2C;TFAP2D
	6	50696630	T	TFAP2D	+	ENST00000008391	220	L	Family-wise	PER1	adj-p=6.54e-03;logp=-2.18;OR=28.41(95%C.I.=7.26-Inf)	1159.para.1	TFAP2A;TFAP2B;TFAP2E;TFAP2C;TFAP2D
	6	50696631	C	TFAP2D	+	ENST00000008391	221	L	Family-wise	PER1	adj-p=6.54e-03;logp=-2.18;OR=28.41(95%C.I.=7.26-Inf)	1159.para.1	TFAP2A;TFAP2B;TFAP2E;TFAP2C;TFAP2D
	6	50696632	T	TFAP2D	+	ENST00000008391	221	L	Family-wise	PER1	adj-p=6.54e-03;logp=-2.18;OR=28.41(95%C.I.=7.26-Inf)	1159.para.1	TFAP2A;TFAP2B;TFAP2E;TFAP2C;TFAP2D
	6	50696633	T	TFAP2D	+	ENST00000008391	221	L	Family-wise	PER1	adj-p=6.54e-03;logp=-2.18;OR=28.41(95%C.I.=7.26-Inf)	1159.para.1	TFAP2A;TFAP2B;TFAP2E;TFAP2C;TFAP2D
	6	50696667	G	TFAP2D	+	ENST00000008391	233	E	Family-wise	PER2	adj-p=4.30e-02;logp=-1.37;OR=15.31(95%C.I.=4.27-Inf)	1159.para.1	TFAP2A;TFAP2B;TFAP2E;TFAP2C;TFAP2D
	6	50696668	A	TFAP2D	+	ENST00000008391	233	E	Family-wise	PER2	adj-p=4.30e-02;logp=-1.37;OR=15.31(95%C.I.=4.27-Inf)	1159.para.1	TFAP2A;TFAP2B;TFAP2E;TFAP2C;TFAP2D
	6	50696669	G	TFAP2D	+	ENST00000008391	233	E	Family-wise	PER2	adj-p=4.30e-02;logp=-1.37;OR=15.31(95%C.I.=4.27-Inf)	1159.para.1	TFAP2A;TFAP2B;TFAP2E;TFAP2C;TFAP2D
	6	50696670	G	TFAP2D	+	ENST00000008391	234	V	Family-wise	PER2	adj-p=4.30e-02;logp=-1.37;OR=15.31(95%C.I.=4.27-Inf)	1159.para.1	TFAP2A;TFAP2B;TFAP2E;TFAP2C;TFAP2D
	6	50696671	T	TFAP2D	+	ENST00000008391	234	V	Family-wise	PER2	adj-p=4.30e-02;logp=-1.37;OR=15.31(95%C.I.=4.27-Inf)	1159.para.1	TFAP2A;TFAP2B;TFAP2E;TFAP2C;TFAP2D
	6	50696672	A	TFAP2D	+	ENST00000008391	234	V	Family-wise	PER2	adj-p=4.30e-02;logp=-1.37;OR=15.31(95%C.I.=4.27-Inf)	1159.para.1	TFAP2A;TFAP2B;TFAP2E;TFAP2C;TFAP2D
	6	50696673	A	TFAP2D	+	ENST00000008391	235	K	Family-wise	PER2	adj-p=4.30e-02;logp=-1.37;OR=15.31(95%C.I.=4.27-Inf)	1159.para.1	TFAP2A;TFAP2B;TFAP2E;TFAP2C;TFAP2D
	6	50696674	A	TFAP2D	+	ENST00000008391	235	K	Family-wise	PER2	adj-p=4.30e-02;logp=-1.37;OR=15.31(95%C.I.=4.27-Inf)	1159.para.1	TFAP2A;TFAP2B;TFAP2E;TFAP2C;TFAP2D
	6	50696675	G	TFAP2D	+	ENST00000008391	235	K	Family-wise	PER2	adj-p=4.30e-02;logp=-1.37;OR=15.31(95%C.I.=4.27-Inf)	1159.para.1	TFAP2A;TFAP2B;TFAP2E;TFAP2C;TFAP2D
	6	50696676	A	TFAP2D	+	ENST00000008391	236	R	Family-wise	PER2	adj-p=4.30e-02;logp=-1.37;OR=15.31(95%C.I.=4.27-Inf)	1159.para.1	TFAP2A;TFAP2B;TFAP2E;TFAP2C;TFAP2D
	6	50696677	G	TFAP2D	+	ENST00000008391	236	R	Family-wise	PER2	adj-p=4.30e-02;logp=-1.37;OR=15.31(95%C.I.=4.27-Inf)	1159.para.1	TFAP2A;TFAP2B;TFAP2E;TFAP2C;TFAP2D
	6	50696678	G	TFAP2D	+	ENST00000008391	236	R	Family-wise	PER2	adj-p=4.30e-02;logp=-1.37;OR=15.31(95%C.I.=4.27-Inf)	1159.para.1	TFAP2A;TFAP2B;TFAP2E;TFAP2C;TFAP2D
	6	50696679	C	TFAP2D	+	ENST00000008391	237	R	Family-wise	PER2	adj-p=4.30e-02;logp=-1.37;OR=15.31(95%C.I.=4.27-Inf)	1159.para.1	TFAP2A;TFAP2B;TFAP2E;TFAP2C;TFAP2D
	6	50696680	G	TFAP2D	+	ENST00000008391	237	R	Family-wise	PER2	adj-p=4.30e-02;logp=-1.37;OR=15.31(95%C.I.=4.27-Inf)	1159.para.1	TFAP2A;TFAP2B;TFAP2E;TFAP2C;TFAP2D
	6	50696681	C	TFAP2D	+	ENST00000008391	237	R	Family-wise	PER2	adj-p=4.30e-02;logp=-1.37;OR=15.31(95%C.I.=4.27-Inf)	1159.para.1	TFAP2A;TFAP2B;TFAP2E;TFAP2C;TFAP2D
	6	50696682	C	TFAP2D	+	ENST00000008391	238	L	Family-wise	PER2	adj-p=4.30e-02;logp=-1.37;OR=15.31(95%C.I.=4.27-Inf)	1159.para.1	TFAP2A;TFAP2B;TFAP2E;TFAP2C;TFAP2D
	6	50696683	T	TFAP2D	+	ENST00000008391	238	L	Family-wise	PER2	adj-p=4.30e-02;logp=-1.37;OR=15.31(95%C.I.=4.27-Inf)	1159.para.1	TFAP2A;TFAP2B;TFAP2E;TFAP2C;TFAP2D
	6	50696684	C	TFAP2D	+	ENST00000008391	238	L	Family-wise	PER2	adj-p=4.30e-02;logp=-1.37;OR=15.31(95%C.I.=4.27-Inf)	1159.para.1	TFAP2A;TFAP2B;TFAP2E;TFAP2C;TFAP2D
	6	50696685	T	TFAP2D	+	ENST00000008391	239	S	Family-wise	PER2	adj-p=4.30e-02;logp=-1.37;OR=15.31(95%C.I.=4.27-Inf)	1159.para.1	TFAP2A;TFAP2B;TFAP2E;TFAP2C;TFAP2D
	6	50696686	C	TFAP2D	+	ENST00000008391	239	S	Family-wise	PER2	adj-p=4.30e-02;logp=-1.37;OR=15.31(95%C.I.=4.27-Inf)	1159.para.1	TFAP2A;TFAP2B;TFAP2E;TFAP2C;TFAP2D
	6	50696687	C	TFAP2D	+	ENST00000008391	239	S	Family-wise	PER2	adj-p=4.30e-02;logp=-1.37;OR=15.31(95%C.I.=4.27-Inf)	1159.para.1	TFAP2A;TFAP2B;TFAP2E;TFAP2C;TFAP2D
	6	50696688	C	TFAP2D	+	ENST00000008391	240	P	Family-wise	PER2	adj-p=4.30e-02;logp=-1.37;OR=15.31(95%C.I.=4.27-Inf)	1159.para.1	TFAP2A;TFAP2B;TFAP2E;TFAP2C;TFAP2D
	6	50696689	C	TFAP2D	+	ENST00000008391	240	P	Family-wise	PER2	adj-p=4.30e-02;logp=-1.37;OR=15.31(95%C.I.=4.27-Inf)	1159.para.1	TFAP2A;TFAP2B;TFAP2E;TFAP2C;TFAP2D
	6	50696690	A	TFAP2D	+	ENST00000008391	240	P	Family-wise	PER2	adj-p=4.30e-02;logp=-1.37;OR=15.31(95%C.I.=4.27-Inf)	1159.para.1	TFAP2A;TFAP2B;TFAP2E;TFAP2C;TFAP2D
	6	50696691	C	TFAP2D	+	ENST00000008391	241	P	Family-wise	PER2	adj-p=4.30e-02;logp=-1.37;OR=15.31(95%C.I.=4.27-Inf)	1159.para.1	TFAP2A;TFAP2B;TFAP2E;TFAP2C;TFAP2D
	6	50696692	C	TFAP2D	+	ENST00000008391	241	P	Family-wise	PER2	adj-p=4.30e-02;logp=-1.37;OR=15.31(95%C.I.=4.27-Inf)	1159.para.1	TFAP2A;TFAP2B;TFAP2E;TFAP2C;TFAP2D
	6	50696693	T	TFAP2D	+	ENST00000008391	241	P	Family-wise	PER2	adj-p=4.30e-02;logp=-1.37;OR=15.31(95%C.I.=4.27-Inf)	1159.para.1	TFAP2A;TFAP2B;TFAP2E;TFAP2C;TFAP2D
	6	50696712	C	TFAP2D	+	ENST00000008391	248	L	Family-wise	PER3	adj-p=3.03e-04;logp=-3.52;OR=37.19(95%C.I.=10.66-Inf)	1159.para.1	TFAP2A;TFAP2B;TFAP2E;TFAP2C;TFAP2D
	6	50696713	T	TFAP2D	+	ENST00000008391	248	L	Family-wise	PER3	adj-p=3.03e-04;logp=-3.52;OR=37.19(95%C.I.=10.66-Inf)	1159.para.1	TFAP2A;TFAP2B;TFAP2E;TFAP2C;TFAP2D
	6	50696714	C	TFAP2D	+	ENST00000008391	248	L	Family-wise	PER3	adj-p=3.03e-04;logp=-3.52;OR=37.19(95%C.I.=10.66-Inf)	1159.para.1	TFAP2A;TFAP2B;TFAP2E;TFAP2C;TFAP2D
	6	50696715	T	TFAP2D	+	ENST00000008391	249	L	Family-wise	PER3	adj-p=3.03e-04;logp=-3.52;OR=37.19(95%C.I.=10.66-Inf)	1159.para.1	TFAP2A;TFAP2B;TFAP2E;TFAP2C;TFAP2D
	6	50696716	T	TFAP2D	+	ENST00000008391	249	L	Family-wise	PER3	adj-p=3.03e-04;logp=-3.52;OR=37.19(95%C.I.=10.66-Inf)	1159.para.1	TFAP2A;TFAP2B;TFAP2E;TFAP2C;TFAP2D
	6	50696717	G	TFAP2D	+	ENST00000008391	249	L	Family-wise	PER3	adj-p=3.03e-04;logp=-3.52;OR=37.19(95%C.I.=10.66-Inf)	1159.para.1	TFAP2A;TFAP2B;TFAP2E;TFAP2C;TFAP2D
	6	50696718	G	TFAP2D	+	ENST00000008391	250	G	Family-wise	PER3	adj-p=3.03e-04;logp=-3.52;OR=37.19(95%C.I.=10.66-Inf)	1159.para.1	TFAP2A;TFAP2B;TFAP2E;TFAP2C;TFAP2D
	6	50696719	G	TFAP2D	+	ENST00000008391	250	G	Family-wise	PER3	adj-p=3.03e-04;logp=-3.52;OR=37.19(95%C.I.=10.66-Inf)	1159.para.1	TFAP2A;TFAP2B;TFAP2E;TFAP2C;TFAP2D
	6	50696720	A	TFAP2D	+	ENST00000008391	250	G	Family-wise	PER3	adj-p=3.03e-04;logp=-3.52;OR=37.19(95%C.I.=10.66-Inf)	1159.para.1	TFAP2A;TFAP2B;TFAP2E;TFAP2C;TFAP2D
	6	50696721	G	TFAP2D	+	ENST00000008391	251	G	Family-wise	PER3	adj-p=3.03e-04;logp=-3.52;OR=37.19(95%C.I.=10.66-Inf)	1159.para.1	TFAP2A;TFAP2B;TFAP2E;TFAP2C;TFAP2D
	6	50696722	G	TFAP2D	+	ENST00000008391	251	G	Family-wise	PER3	adj-p=3.03e-04;logp=-3.52;OR=37.19(95%C.I.=10.66-Inf)	1159.para.1	TFAP2A;TFAP2B;TFAP2E;TFAP2C;TFAP2D
	6	50696723	C	TFAP2D	+	ENST00000008391	251	G	Family-wise	PER3	adj-p=3.03e-04;logp=-3.52;OR=37.19(95%C.I.=10.66-Inf)	1159.para.1	TFAP2A;TFAP2B;TFAP2E;TFAP2C;TFAP2D
	6	50696724	A	TFAP2D	+	ENST00000008391	252	I	Family-wise	PER3	adj-p=3.03e-04;logp=-3.52;OR=37.19(95%C.I.=10.66-Inf)	1159.para.1	TFAP2A;TFAP2B;TFAP2E;TFAP2C;TFAP2D
	6	50696725	T	TFAP2D	+	ENST00000008391	252	I	Family-wise	PER3	adj-p=3.03e-04;logp=-3.52;OR=37.19(95%C.I.=10.66-Inf)	1159.para.1	TFAP2A;TFAP2B;TFAP2E;TFAP2C;TFAP2D
	6	50696726	T	TFAP2D	+	ENST00000008391	252	I	Family-wise	PER3	adj-p=3.03e-04;logp=-3.52;OR=37.19(95%C.I.=10.66-Inf)	1159.para.1	TFAP2A;TFAP2B;TFAP2E;TFAP2C;TFAP2D
	6	50696727	T	TFAP2D	+	ENST00000008391	253	L	Family-wise	PER3	adj-p=7.39e-04;logp=-3.13;OR=65.93(95%C.I.=13.57-Inf)	1159.para.1	TFAP2A;TFAP2B;TFAP2E;TFAP2C;TFAP2D
	6	50696728	T	TFAP2D	+	ENST00000008391	253	L	Family-wise	PER3	adj-p=7.39e-04;logp=-3.13;OR=65.93(95%C.I.=13.57-Inf)	1159.para.1	TFAP2A;TFAP2B;TFAP2E;TFAP2C;TFAP2D
	6	50696729	G	TFAP2D	+	ENST00000008391	253	L	Family-wise	PER3	adj-p=7.39e-04;logp=-3.13;OR=65.93(95%C.I.=13.57-Inf)	1159.para.1	TFAP2A;TFAP2B;TFAP2E;TFAP2C;TFAP2D
	6	50696730	A	TFAP2D	+	ENST00000008391	254	R	Family-wise	PER3	adj-p=7.39e-04;logp=-3.13;OR=65.93(95%C.I.=13.57-Inf)	1159.para.1	TFAP2A;TFAP2B;TFAP2E;TFAP2C;TFAP2D
	6	50696731	G	TFAP2D	+	ENST00000008391	254	R	Family-wise	PER3	adj-p=7.39e-04;logp=-3.13;OR=65.93(95%C.I.=13.57-Inf)	1159.para.1	TFAP2A;TFAP2B;TFAP2E;TFAP2C;TFAP2D
	6	50696732	A	TFAP2D	+	ENST00000008391	254	R	Family-wise	PER3	adj-p=7.39e-04;logp=-3.13;OR=65.93(95%C.I.=13.57-Inf)	1159.para.1	TFAP2A;TFAP2B;TFAP2E;TFAP2C;TFAP2D
	6	50696905	A	TFAP2D	+	ENST00000008391	255	R	Family-wise	PER3	adj-p=7.39e-04;logp=-3.13;OR=65.93(95%C.I.=13.57-Inf)	1159.para.1	TFAP2A;TFAP2B;TFAP2E;TFAP2C;TFAP2D
	6	50696906	G	TFAP2D	+	ENST00000008391	255	R	Family-wise	PER3	adj-p=7.39e-04;logp=-3.13;OR=65.93(95%C.I.=13.57-Inf)	1159.para.1	TFAP2A;TFAP2B;TFAP2E;TFAP2C;TFAP2D
	6	50696907	A	TFAP2D	+	ENST00000008391	255	R	Family-wise	PER3	adj-p=7.39e-04;logp=-3.13;OR=65.93(95%C.I.=13.57-Inf)	1159.para.1	TFAP2A;TFAP2B;TFAP2E;TFAP2C;TFAP2D
	6	50696908	G	TFAP2D	+	ENST00000008391	256	A	Family-wise	PER3	adj-p=7.39e-04;logp=-3.13;OR=65.93(95%C.I.=13.57-Inf)	1159.para.1	TFAP2A;TFAP2B;TFAP2E;TFAP2C;TFAP2D
	6	50696909	C	TFAP2D	+	ENST00000008391	256	A	Family-wise	PER3	adj-p=7.39e-04;logp=-3.13;OR=65.93(95%C.I.=13.57-Inf)	1159.para.1	TFAP2A;TFAP2B;TFAP2E;TFAP2C;TFAP2D
	6	50696910	A	TFAP2D	+	ENST00000008391	256	A	Family-wise	PER3	adj-p=7.39e-04;logp=-3.13;OR=65.93(95%C.I.=13.57-Inf)	1159.para.1	TFAP2A;TFAP2B;TFAP2E;TFAP2C;TFAP2D
	6	50696911	A	TFAP2D	+	ENST00000008391	257	K	Family-wise	PER3	adj-p=7.39e-04;logp=-3.13;OR=65.93(95%C.I.=13.57-Inf)	1159.para.1	TFAP2A;TFAP2B;TFAP2E;TFAP2C;TFAP2D
	6	50696912	A	TFAP2D	+	ENST00000008391	257	K	Family-wise	PER3	adj-p=7.39e-04;logp=-3.13;OR=65.93(95%C.I.=13.57-Inf)	1159.para.1	TFAP2A;TFAP2B;TFAP2E;TFAP2C;TFAP2D
	6	50696913	A	TFAP2D	+	ENST00000008391	257	K	Family-wise	PER3	adj-p=7.39e-04;logp=-3.13;OR=65.93(95%C.I.=13.57-Inf)	1159.para.1	TFAP2A;TFAP2B;TFAP2E;TFAP2C;TFAP2D
	6	50696914	T	TFAP2D	+	ENST00000008391	258	S	Family-wise	PER3	adj-p=7.39e-04;logp=-3.13;OR=65.93(95%C.I.=13.57-Inf)	1159.para.1	TFAP2A;TFAP2B;TFAP2E;TFAP2C;TFAP2D
	6	50696915	C	TFAP2D	+	ENST00000008391	258	S	Family-wise	PER3	adj-p=7.39e-04;logp=-3.13;OR=65.93(95%C.I.=13.57-Inf)	1159.para.1	TFAP2A;TFAP2B;TFAP2E;TFAP2C;TFAP2D
	6	50696916	A	TFAP2D	+	ENST00000008391	258	S	Family-wise	PER3	adj-p=7.39e-04;logp=-3.13;OR=65.93(95%C.I.=13.57-Inf)	1159.para.1	TFAP2A;TFAP2B;TFAP2E;TFAP2C;TFAP2D
	6	50696917	A	TFAP2D	+	ENST00000008391	259	K	Family-wise	PER3	adj-p=7.39e-04;logp=-3.13;OR=65.93(95%C.I.=13.57-Inf)	1159.para.1	TFAP2A;TFAP2B;TFAP2E;TFAP2C;TFAP2D
	6	50696918	A	TFAP2D	+	ENST00000008391	259	K	Family-wise	PER3	adj-p=7.39e-04;logp=-3.13;OR=65.93(95%C.I.=13.57-Inf)	1159.para.1	TFAP2A;TFAP2B;TFAP2E;TFAP2C;TFAP2D
	6	50696919	G	TFAP2D	+	ENST00000008391	259	K	Family-wise	PER3	adj-p=7.39e-04;logp=-3.13;OR=65.93(95%C.I.=13.57-Inf)	1159.para.1	TFAP2A;TFAP2B;TFAP2E;TFAP2C;TFAP2D
	6	50696920	A	TFAP2D	+	ENST00000008391	260	N	Family-wise	PER3	adj-p=7.39e-04;logp=-3.13;OR=65.93(95%C.I.=13.57-Inf)	1159.para.1	TFAP2A;TFAP2B;TFAP2E;TFAP2C;TFAP2D
	6	50696921	A	TFAP2D	+	ENST00000008391	260	N	Family-wise	PER3	adj-p=7.39e-04;logp=-3.13;OR=65.93(95%C.I.=13.57-Inf)	1159.para.1	TFAP2A;TFAP2B;TFAP2E;TFAP2C;TFAP2D
	6	50696922	T	TFAP2D	+	ENST00000008391	260	N	Family-wise	PER3	adj-p=7.39e-04;logp=-3.13;OR=65.93(95%C.I.=13.57-Inf)	1159.para.1	TFAP2A;TFAP2B;TFAP2E;TFAP2C;TFAP2D
	6	50696923	G	TFAP2D	+	ENST00000008391	261	G	Family-wise	PER3	adj-p=7.39e-04;logp=-3.13;OR=65.93(95%C.I.=13.57-Inf)	1159.para.1	TFAP2A;TFAP2B;TFAP2E;TFAP2C;TFAP2D
	6	50696924	G	TFAP2D	+	ENST00000008391	261	G	Family-wise	PER3	adj-p=7.39e-04;logp=-3.13;OR=65.93(95%C.I.=13.57-Inf)	1159.para.1	TFAP2A;TFAP2B;TFAP2E;TFAP2C;TFAP2D
	6	50696925	G	TFAP2D	+	ENST00000008391	261	G	Family-wise	PER3	adj-p=7.39e-04;logp=-3.13;OR=65.93(95%C.I.=13.57-Inf)	1159.para.1	TFAP2A;TFAP2B;TFAP2E;TFAP2C;TFAP2D
	1	209778930	A	CAMK1G	+	ENST00000009105	116	T	Family-wise	PER1	adj-p=9.18e-03;logp=-2.04;OR=55.62(95%C.I.=11.80-Inf)	3041.para.3	CAMK2D;CAMK2G;CAMK2B;CAMK2A;CAMK4;CAMK1G;CAMKV
	1	209778931	C	CAMK1G	+	ENST00000009105	116	T	Family-wise	PER1	adj-p=9.18e-03;logp=-2.04;OR=55.62(95%C.I.=11.80-Inf)	3041.para.3	CAMK2D;CAMK2G;CAMK2B;CAMK2A;CAMK4;CAMK1G;CAMKV
	1	209778932	A	CAMK1G	+	ENST00000009105	116	T	Family-wise	PER1	adj-p=9.18e-03;logp=-2.04;OR=55.62(95%C.I.=11.80-Inf)	3041.para.3	CAMK2D;CAMK2G;CAMK2B;CAMK2A;CAMK4;CAMK1G;CAMKV
	1	209778933	G	CAMK1G	+	ENST00000009105	117	E	Family-wise	PER1	adj-p=9.18e-03;logp=-2.04;OR=55.62(95%C.I.=11.80-Inf)	3041.para.3	CAMK2D;CAMK2G;CAMK2B;CAMK2A;CAMK4;CAMK1G;CAMKV
	1	209778934	A	CAMK1G	+	ENST00000009105	117	E	Family-wise	PER1	adj-p=9.18e-03;logp=-2.04;OR=55.62(95%C.I.=11.80-Inf)	3041.para.3	CAMK2D;CAMK2G;CAMK2B;CAMK2A;CAMK4;CAMK1G;CAMKV
	1	209778935	G	CAMK1G	+	ENST00000009105	117	E	Family-wise	PER1	adj-p=9.18e-03;logp=-2.04;OR=55.62(95%C.I.=11.80-Inf)	3041.para.3	CAMK2D;CAMK2G;CAMK2B;CAMK2A;CAMK4;CAMK1G;CAMKV
	1	209778936	A	CAMK1G	+	ENST00000009105	118	K	Family-wise	PER1	adj-p=9.18e-03;logp=-2.04;OR=55.62(95%C.I.=11.80-Inf)	3041.para.3	CAMK2D;CAMK2G;CAMK2B;CAMK2A;CAMK4;CAMK1G;CAMKV
	1	209778937	A	CAMK1G	+	ENST00000009105	118	K	Family-wise	PER1	adj-p=9.18e-03;logp=-2.04;OR=55.62(95%C.I.=11.80-Inf)	3041.para.3	CAMK2D;CAMK2G;CAMK2B;CAMK2A;CAMK4;CAMK1G;CAMKV
	1	209778938	G	CAMK1G	+	ENST00000009105	118	K	Family-wise	PER1	adj-p=9.18e-03;logp=-2.04;OR=55.62(95%C.I.=11.80-Inf)	3041.para.3	CAMK2D;CAMK2G;CAMK2B;CAMK2A;CAMK4;CAMK1G;CAMKV
	1	209778939	G	CAMK1G	+	ENST00000009105	119	D	Family-wise	PER1	adj-p=9.18e-03;logp=-2.04;OR=55.62(95%C.I.=11.80-Inf)	3041.para.3	CAMK2D;CAMK2G;CAMK2B;CAMK2A;CAMK4;CAMK1G;CAMKV
	1	209778940	A	CAMK1G	+	ENST00000009105	119	D	Family-wise	PER1	adj-p=9.18e-03;logp=-2.04;OR=55.62(95%C.I.=11.80-Inf)	3041.para.3	CAMK2D;CAMK2G;CAMK2B;CAMK2A;CAMK4;CAMK1G;CAMKV
	1	209778941	T	CAMK1G	+	ENST00000009105	119	D	Family-wise	PER1	adj-p=9.18e-03;logp=-2.04;OR=55.62(95%C.I.=11.80-Inf)	3041.para.3	CAMK2D;CAMK2G;CAMK2B;CAMK2A;CAMK4;CAMK1G;CAMKV
	1	209778942	G	CAMK1G	+	ENST00000009105	120	A	Family-wise	PER1	adj-p=9.18e-03;logp=-2.04;OR=55.62(95%C.I.=11.80-Inf)	3041.para.3	CAMK2D;CAMK2G;CAMK2B;CAMK2A;CAMK4;CAMK1G;CAMKV
	1	209778943	C	CAMK1G	+	ENST00000009105	120	A	Family-wise	PER1	adj-p=9.18e-03;logp=-2.04;OR=55.62(95%C.I.=11.80-Inf)	3041.para.3	CAMK2D;CAMK2G;CAMK2B;CAMK2A;CAMK4;CAMK1G;CAMKV
	1	209778944	C	CAMK1G	+	ENST00000009105	120	A	Family-wise	PER1	adj-p=9.18e-03;logp=-2.04;OR=55.62(95%C.I.=11.80-Inf)	3041.para.3	CAMK2D;CAMK2G;CAMK2B;CAMK2A;CAMK4;CAMK1G;CAMKV
	1	209778945	A	CAMK1G	+	ENST00000009105	121	S	Family-wise	PER1	adj-p=9.18e-03;logp=-2.04;OR=55.62(95%C.I.=11.80-Inf)	3041.para.3	CAMK2D;CAMK2G;CAMK2B;CAMK2A;CAMK4;CAMK1G;CAMKV
	1	209778946	G	CAMK1G	+	ENST00000009105	121	S	Family-wise	PER1	adj-p=9.18e-03;logp=-2.04;OR=55.62(95%C.I.=11.80-Inf)	3041.para.3	CAMK2D;CAMK2G;CAMK2B;CAMK2A;CAMK4;CAMK1G;CAMKV
	1	209778947	T	CAMK1G	+	ENST00000009105	121	S	Family-wise	PER1	adj-p=9.18e-03;logp=-2.04;OR=55.62(95%C.I.=11.80-Inf)	3041.para.3	CAMK2D;CAMK2G;CAMK2B;CAMK2A;CAMK4;CAMK1G;CAMKV
	1	209778948	C	CAMK1G	+	ENST00000009105	122	L	Family-wise	PER1	adj-p=9.18e-03;logp=-2.04;OR=55.62(95%C.I.=11.80-Inf)	3041.para.3	CAMK2D;CAMK2G;CAMK2B;CAMK2A;CAMK4;CAMK1G;CAMKV
	1	209778949	T	CAMK1G	+	ENST00000009105	122	L	Family-wise	PER1	adj-p=9.18e-03;logp=-2.04;OR=55.62(95%C.I.=11.80-Inf)	3041.para.3	CAMK2D;CAMK2G;CAMK2B;CAMK2A;CAMK4;CAMK1G;CAMKV
	1	209778950	G	CAMK1G	+	ENST00000009105	122	L	Family-wise	PER1	adj-p=9.18e-03;logp=-2.04;OR=55.62(95%C.I.=11.80-Inf)	3041.para.3	CAMK2D;CAMK2G;CAMK2B;CAMK2A;CAMK4;CAMK1G;CAMKV
	1	209778951	G	CAMK1G	+	ENST00000009105	123	V	Family-wise	PER1	adj-p=9.18e-03;logp=-2.04;OR=55.62(95%C.I.=11.80-Inf)	3041.para.3	CAMK2D;CAMK2G;CAMK2B;CAMK2A;CAMK4;CAMK1G;CAMKV
	1	209778952	T	CAMK1G	+	ENST00000009105	123	V	Family-wise	PER1	adj-p=9.18e-03;logp=-2.04;OR=55.62(95%C.I.=11.80-Inf)	3041.para.3	CAMK2D;CAMK2G;CAMK2B;CAMK2A;CAMK4;CAMK1G;CAMKV
	1	209778953	G	CAMK1G	+	ENST00000009105	123	V	Family-wise	PER1	adj-p=9.18e-03;logp=-2.04;OR=55.62(95%C.I.=11.80-Inf)	3041.para.3	CAMK2D;CAMK2G;CAMK2B;CAMK2A;CAMK4;CAMK1G;CAMKV
	1	209778954	A	CAMK1G	+	ENST00000009105	124	I	Family-wise	PER1	adj-p=9.18e-03;logp=-2.04;OR=55.62(95%C.I.=11.80-Inf)	3041.para.3	CAMK2D;CAMK2G;CAMK2B;CAMK2A;CAMK4;CAMK1G;CAMKV
	1	209778955	T	CAMK1G	+	ENST00000009105	124	I	Family-wise	PER1	adj-p=9.18e-03;logp=-2.04;OR=55.62(95%C.I.=11.80-Inf)	3041.para.3	CAMK2D;CAMK2G;CAMK2B;CAMK2A;CAMK4;CAMK1G;CAMKV
	1	209778956	C	CAMK1G	+	ENST00000009105	124	I	Family-wise	PER1	adj-p=9.18e-03;logp=-2.04;OR=55.62(95%C.I.=11.80-Inf)	3041.para.3	CAMK2D;CAMK2G;CAMK2B;CAMK2A;CAMK4;CAMK1G;CAMKV
	1	209784832	C	CAMK1G	+	ENST00000009105	284	H	Family-wise	PER2	adj-p=1.50e-02;logp=-1.82;OR=45.62(95%C.I.=9.91-Inf)	3041.para.3	CAMK2D;CAMK2G;CAMK2B;CAMK2A;CAMK4;CAMK1G;CAMKV
	1	209784833	A	CAMK1G	+	ENST00000009105	284	H	Family-wise	PER2	adj-p=1.50e-02;logp=-1.82;OR=45.62(95%C.I.=9.91-Inf)	3041.para.3	CAMK2D;CAMK2G;CAMK2B;CAMK2A;CAMK4;CAMK1G;CAMKV
	1	209784834	C	CAMK1G	+	ENST00000009105	284	H	Family-wise	PER2	adj-p=1.50e-02;logp=-1.82;OR=45.62(95%C.I.=9.91-Inf)	3041.para.3	CAMK2D;CAMK2G;CAMK2B;CAMK2A;CAMK4;CAMK1G;CAMKV
	1	209784835	C	CAMK1G	+	ENST00000009105	285	R	Family-wise	PER2	adj-p=1.50e-02;logp=-1.82;OR=45.62(95%C.I.=9.91-Inf)	3041.para.3	CAMK2D;CAMK2G;CAMK2B;CAMK2A;CAMK4;CAMK1G;CAMKV
	1	209784836	G	CAMK1G	+	ENST00000009105	285	R	Family-wise	PER2	adj-p=1.50e-02;logp=-1.82;OR=45.62(95%C.I.=9.91-Inf)	3041.para.3	CAMK2D;CAMK2G;CAMK2B;CAMK2A;CAMK4;CAMK1G;CAMKV
	1	209784837	G	CAMK1G	+	ENST00000009105	285	R	Family-wise	PER2	adj-p=1.50e-02;logp=-1.82;OR=45.62(95%C.I.=9.91-Inf)	3041.para.3	CAMK2D;CAMK2G;CAMK2B;CAMK2A;CAMK4;CAMK1G;CAMKV
	1	209784838	G	CAMK1G	+	ENST00000009105	286	D	Family-wise	PER2	adj-p=1.50e-02;logp=-1.82;OR=45.62(95%C.I.=9.91-Inf)	3041.para.3	CAMK2D;CAMK2G;CAMK2B;CAMK2A;CAMK4;CAMK1G;CAMKV
	1	209784839	A	CAMK1G	+	ENST00000009105	286	D	Family-wise	PER2	adj-p=1.50e-02;logp=-1.82;OR=45.62(95%C.I.=9.91-Inf)	3041.para.3	CAMK2D;CAMK2G;CAMK2B;CAMK2A;CAMK4;CAMK1G;CAMKV
	1	209784840	C	CAMK1G	+	ENST00000009105	286	D	Family-wise	PER2	adj-p=1.50e-02;logp=-1.82;OR=45.62(95%C.I.=9.91-Inf)	3041.para.3	CAMK2D;CAMK2G;CAMK2B;CAMK2A;CAMK4;CAMK1G;CAMKV
	1	209784841	A	CAMK1G	+	ENST00000009105	287	I	Family-wise	PER2	adj-p=1.50e-02;logp=-1.82;OR=45.62(95%C.I.=9.91-Inf)	3041.para.3	CAMK2D;CAMK2G;CAMK2B;CAMK2A;CAMK4;CAMK1G;CAMKV
	1	209784842	T	CAMK1G	+	ENST00000009105	287	I	Family-wise	PER2	adj-p=1.50e-02;logp=-1.82;OR=45.62(95%C.I.=9.91-Inf)	3041.para.3	CAMK2D;CAMK2G;CAMK2B;CAMK2A;CAMK4;CAMK1G;CAMKV
	1	209784843	C	CAMK1G	+	ENST00000009105	287	I	Family-wise	PER2	adj-p=1.50e-02;logp=-1.82;OR=45.62(95%C.I.=9.91-Inf)	3041.para.3	CAMK2D;CAMK2G;CAMK2B;CAMK2A;CAMK4;CAMK1G;CAMKV
	1	209784844	T	CAMK1G	+	ENST00000009105	288	Y	Family-wise	PER2	adj-p=1.50e-02;logp=-1.82;OR=45.62(95%C.I.=9.91-Inf)	3041.para.3	CAMK2D;CAMK2G;CAMK2B;CAMK2A;CAMK4;CAMK1G;CAMKV
	1	209784845	A	CAMK1G	+	ENST00000009105	288	Y	Family-wise	PER2	adj-p=1.50e-02;logp=-1.82;OR=45.62(95%C.I.=9.91-Inf)	3041.para.3	CAMK2D;CAMK2G;CAMK2B;CAMK2A;CAMK4;CAMK1G;CAMKV
	1	209784846	C	CAMK1G	+	ENST00000009105	288	Y	Family-wise	PER2	adj-p=1.50e-02;logp=-1.82;OR=45.62(95%C.I.=9.91-Inf)	3041.para.3	CAMK2D;CAMK2G;CAMK2B;CAMK2A;CAMK4;CAMK1G;CAMKV
	1	209784847	C	CAMK1G	+	ENST00000009105	289	P	Family-wise	PER2	adj-p=9.18e-03;logp=-2.04;OR=55.62(95%C.I.=11.80-Inf)	3041.para.3	CAMK2D;CAMK2G;CAMK2B;CAMK2A;CAMK4;CAMK1G;CAMKV
	1	209784848	C	CAMK1G	+	ENST00000009105	289	P	Family-wise	PER2	adj-p=9.18e-03;logp=-2.04;OR=55.62(95%C.I.=11.80-Inf)	3041.para.3	CAMK2D;CAMK2G;CAMK2B;CAMK2A;CAMK4;CAMK1G;CAMKV
	1	209784849	A	CAMK1G	+	ENST00000009105	289	P	Family-wise	PER2	adj-p=9.18e-03;logp=-2.04;OR=55.62(95%C.I.=11.80-Inf)	3041.para.3	CAMK2D;CAMK2G;CAMK2B;CAMK2A;CAMK4;CAMK1G;CAMKV
	1	209784850	T	CAMK1G	+	ENST00000009105	290	S	Family-wise	PER2	adj-p=9.18e-03;logp=-2.04;OR=55.62(95%C.I.=11.80-Inf)	3041.para.3	CAMK2D;CAMK2G;CAMK2B;CAMK2A;CAMK4;CAMK1G;CAMKV
	1	209784851	C	CAMK1G	+	ENST00000009105	290	S	Family-wise	PER2	adj-p=9.18e-03;logp=-2.04;OR=55.62(95%C.I.=11.80-Inf)	3041.para.3	CAMK2D;CAMK2G;CAMK2B;CAMK2A;CAMK4;CAMK1G;CAMKV
	1	209784852	A	CAMK1G	+	ENST00000009105	290	S	Family-wise	PER2	adj-p=9.18e-03;logp=-2.04;OR=55.62(95%C.I.=11.80-Inf)	3041.para.3	CAMK2D;CAMK2G;CAMK2B;CAMK2A;CAMK4;CAMK1G;CAMKV
	1	209784853	G	CAMK1G	+	ENST00000009105	291	V	Family-wise	PER2	adj-p=9.18e-03;logp=-2.04;OR=55.62(95%C.I.=11.80-Inf)	3041.para.3	CAMK2D;CAMK2G;CAMK2B;CAMK2A;CAMK4;CAMK1G;CAMKV
	1	209784854	T	CAMK1G	+	ENST00000009105	291	V	Family-wise	PER2	adj-p=9.18e-03;logp=-2.04;OR=55.62(95%C.I.=11.80-Inf)	3041.para.3	CAMK2D;CAMK2G;CAMK2B;CAMK2A;CAMK4;CAMK1G;CAMKV
	1	209784855	C	CAMK1G	+	ENST00000009105	291	V	Family-wise	PER2	adj-p=9.18e-03;logp=-2.04;OR=55.62(95%C.I.=11.80-Inf)	3041.para.3	CAMK2D;CAMK2G;CAMK2B;CAMK2A;CAMK4;CAMK1G;CAMKV
	1	209784856	A	CAMK1G	+	ENST00000009105	292	S	Family-wise	PER2	adj-p=9.18e-03;logp=-2.04;OR=55.62(95%C.I.=11.80-Inf)	3041.para.3	CAMK2D;CAMK2G;CAMK2B;CAMK2A;CAMK4;CAMK1G;CAMKV
	1	209784857	G	CAMK1G	+	ENST00000009105	292	S	Family-wise	PER2	adj-p=9.18e-03;logp=-2.04;OR=55.62(95%C.I.=11.80-Inf)	3041.para.3	CAMK2D;CAMK2G;CAMK2B;CAMK2A;CAMK4;CAMK1G;CAMKV
	1	209784858	C	CAMK1G	+	ENST00000009105	292	S	Family-wise	PER2	adj-p=9.18e-03;logp=-2.04;OR=55.62(95%C.I.=11.80-Inf)	3041.para.3	CAMK2D;CAMK2G;CAMK2B;CAMK2A;CAMK4;CAMK1G;CAMKV
	1	209784859	C	CAMK1G	+	ENST00000009105	293	L	Family-wise	PER2	adj-p=9.18e-03;logp=-2.04;OR=55.62(95%C.I.=11.80-Inf)	3041.para.3	CAMK2D;CAMK2G;CAMK2B;CAMK2A;CAMK4;CAMK1G;CAMKV
	1	209784860	T	CAMK1G	+	ENST00000009105	293	L	Family-wise	PER2	adj-p=9.18e-03;logp=-2.04;OR=55.62(95%C.I.=11.80-Inf)	3041.para.3	CAMK2D;CAMK2G;CAMK2B;CAMK2A;CAMK4;CAMK1G;CAMKV
	1	209784861	C	CAMK1G	+	ENST00000009105	293	L	Family-wise	PER2	adj-p=9.18e-03;logp=-2.04;OR=55.62(95%C.I.=11.80-Inf)	3041.para.3	CAMK2D;CAMK2G;CAMK2B;CAMK2A;CAMK4;CAMK1G;CAMKV
	1	209784862	C	CAMK1G	+	ENST00000009105	294	Q	Family-wise	PER2	adj-p=9.18e-03;logp=-2.04;OR=55.62(95%C.I.=11.80-Inf)	3041.para.3	CAMK2D;CAMK2G;CAMK2B;CAMK2A;CAMK4;CAMK1G;CAMKV
	1	209784863	A	CAMK1G	+	ENST00000009105	294	Q	Family-wise	PER2	adj-p=9.18e-03;logp=-2.04;OR=55.62(95%C.I.=11.80-Inf)	3041.para.3	CAMK2D;CAMK2G;CAMK2B;CAMK2A;CAMK4;CAMK1G;CAMKV
	1	209784864	G	CAMK1G	+	ENST00000009105	294	Q	Family-wise	PER2	adj-p=9.18e-03;logp=-2.04;OR=55.62(95%C.I.=11.80-Inf)	3041.para.3	CAMK2D;CAMK2G;CAMK2B;CAMK2A;CAMK4;CAMK1G;CAMKV
	1	209784865	A	CAMK1G	+	ENST00000009105	295	I	Family-wise	PER2	adj-p=9.18e-03;logp=-2.04;OR=55.62(95%C.I.=11.80-Inf)	3041.para.3	CAMK2D;CAMK2G;CAMK2B;CAMK2A;CAMK4;CAMK1G;CAMKV
	1	209784866	T	CAMK1G	+	ENST00000009105	295	I	Family-wise	PER2	adj-p=9.18e-03;logp=-2.04;OR=55.62(95%C.I.=11.80-Inf)	3041.para.3	CAMK2D;CAMK2G;CAMK2B;CAMK2A;CAMK4;CAMK1G;CAMKV
	1	209784867	C	CAMK1G	+	ENST00000009105	295	I	Family-wise	PER2	adj-p=9.18e-03;logp=-2.04;OR=55.62(95%C.I.=11.80-Inf)	3041.para.3	CAMK2D;CAMK2G;CAMK2B;CAMK2A;CAMK4;CAMK1G;CAMKV
	1	209784868	C	CAMK1G	+	ENST00000009105	296	Q	Family-wise	PER2	adj-p=9.18e-03;logp=-2.04;OR=55.62(95%C.I.=11.80-Inf)	3041.para.3	CAMK2D;CAMK2G;CAMK2B;CAMK2A;CAMK4;CAMK1G;CAMKV
	1	209784869	A	CAMK1G	+	ENST00000009105	296	Q	Family-wise	PER2	adj-p=9.18e-03;logp=-2.04;OR=55.62(95%C.I.=11.80-Inf)	3041.para.3	CAMK2D;CAMK2G;CAMK2B;CAMK2A;CAMK4;CAMK1G;CAMKV
	1	209784870	G	CAMK1G	+	ENST00000009105	296	Q	Family-wise	PER2	adj-p=9.18e-03;logp=-2.04;OR=55.62(95%C.I.=11.80-Inf)	3041.para.3	CAMK2D;CAMK2G;CAMK2B;CAMK2A;CAMK4;CAMK1G;CAMKV
	1	209784871	A	CAMK1G	+	ENST00000009105	297	K	Family-wise	PER2	adj-p=9.18e-03;logp=-2.04;OR=55.62(95%C.I.=11.80-Inf)	3041.para.3	CAMK2D;CAMK2G;CAMK2B;CAMK2A;CAMK4;CAMK1G;CAMKV
	1	209784872	A	CAMK1G	+	ENST00000009105	297	K	Family-wise	PER2	adj-p=9.18e-03;logp=-2.04;OR=55.62(95%C.I.=11.80-Inf)	3041.para.3	CAMK2D;CAMK2G;CAMK2B;CAMK2A;CAMK4;CAMK1G;CAMKV
	1	209784873	G	CAMK1G	+	ENST00000009105	297	K	Family-wise	PER2	adj-p=9.18e-03;logp=-2.04;OR=55.62(95%C.I.=11.80-Inf)	3041.para.3	CAMK2D;CAMK2G;CAMK2B;CAMK2A;CAMK4;CAMK1G;CAMKV
	7	130024419	C	CPA1	+	ENST00000011292	247	L	Family-wise	PER1	adj-p=2.68e-02;logp=-1.57;OR=8.03(95%C.I.=3.11-Inf)	2631.para.1	CPB1;CPA3;CPA2;CPA4;CPA1;CPA5;CPB2;CPA6
	7	130024420	T	CPA1	+	ENST00000011292	247	L	Family-wise	PER1	adj-p=2.68e-02;logp=-1.57;OR=8.03(95%C.I.=3.11-Inf)	2631.para.1	CPB1;CPA3;CPA2;CPA4;CPA1;CPA5;CPB2;CPA6
	7	130024421	C	CPA1	+	ENST00000011292	247	L	Family-wise	PER1	adj-p=2.68e-02;logp=-1.57;OR=8.03(95%C.I.=3.11-Inf)	2631.para.1	CPB1;CPA3;CPA2;CPA4;CPA1;CPA5;CPB2;CPA6
	7	130024422	T	CPA1	+	ENST00000011292	248	C	Family-wise	PER1	adj-p=2.68e-02;logp=-1.57;OR=8.03(95%C.I.=3.11-Inf)	2631.para.1	CPB1;CPA3;CPA2;CPA4;CPA1;CPA5;CPB2;CPA6
	7	130024423	G	CPA1	+	ENST00000011292	248	C	Family-wise	PER1	adj-p=2.68e-02;logp=-1.57;OR=8.03(95%C.I.=3.11-Inf)	2631.para.1	CPB1;CPA3;CPA2;CPA4;CPA1;CPA5;CPB2;CPA6
	7	130024424	T	CPA1	+	ENST00000011292	248	C	Family-wise	PER1	adj-p=2.68e-02;logp=-1.57;OR=8.03(95%C.I.=3.11-Inf)	2631.para.1	CPB1;CPA3;CPA2;CPA4;CPA1;CPA5;CPB2;CPA6
	7	130024425	A	CPA1	+	ENST00000011292	249	I	Family-wise	PER1	adj-p=2.68e-02;logp=-1.57;OR=8.03(95%C.I.=3.11-Inf)	2631.para.1	CPB1;CPA3;CPA2;CPA4;CPA1;CPA5;CPB2;CPA6
	7	130024426	T	CPA1	+	ENST00000011292	249	I	Family-wise	PER1	adj-p=2.68e-02;logp=-1.57;OR=8.03(95%C.I.=3.11-Inf)	2631.para.1	CPB1;CPA3;CPA2;CPA4;CPA1;CPA5;CPB2;CPA6
	7	130024427	T	CPA1	+	ENST00000011292	249	I	Family-wise	PER1	adj-p=2.68e-02;logp=-1.57;OR=8.03(95%C.I.=3.11-Inf)	2631.para.1	CPB1;CPA3;CPA2;CPA4;CPA1;CPA5;CPB2;CPA6
	7	130024428	G	CPA1	+	ENST00000011292	250	G	Family-wise	PER1	adj-p=2.68e-02;logp=-1.57;OR=8.03(95%C.I.=3.11-Inf)	2631.para.1	CPB1;CPA3;CPA2;CPA4;CPA1;CPA5;CPB2;CPA6
	7	130024429	G	CPA1	+	ENST00000011292	250	G	Family-wise	PER1	adj-p=2.68e-02;logp=-1.57;OR=8.03(95%C.I.=3.11-Inf)	2631.para.1	CPB1;CPA3;CPA2;CPA4;CPA1;CPA5;CPB2;CPA6
	7	130024430	C	CPA1	+	ENST00000011292	250	G	Family-wise	PER1	adj-p=2.68e-02;logp=-1.57;OR=8.03(95%C.I.=3.11-Inf)	2631.para.1	CPB1;CPA3;CPA2;CPA4;CPA1;CPA5;CPB2;CPA6
	7	130024431	G	CPA1	+	ENST00000011292	251	V	Family-wise	PER1	adj-p=2.68e-02;logp=-1.57;OR=8.03(95%C.I.=3.11-Inf)	2631.para.1	CPB1;CPA3;CPA2;CPA4;CPA1;CPA5;CPB2;CPA6
	7	130024432	T	CPA1	+	ENST00000011292	251	V	Family-wise	PER1	adj-p=2.68e-02;logp=-1.57;OR=8.03(95%C.I.=3.11-Inf)	2631.para.1	CPB1;CPA3;CPA2;CPA4;CPA1;CPA5;CPB2;CPA6
	7	130024433	G	CPA1	+	ENST00000011292	251	V	Family-wise	PER1	adj-p=2.68e-02;logp=-1.57;OR=8.03(95%C.I.=3.11-Inf)	2631.para.1	CPB1;CPA3;CPA2;CPA4;CPA1;CPA5;CPB2;CPA6
	7	130024434	G	CPA1	+	ENST00000011292	252	D	Family-wise	PER1	adj-p=2.68e-02;logp=-1.57;OR=8.03(95%C.I.=3.11-Inf)	2631.para.1	CPB1;CPA3;CPA2;CPA4;CPA1;CPA5;CPB2;CPA6
	7	130024435	A	CPA1	+	ENST00000011292	252	D	Family-wise	PER1	adj-p=2.68e-02;logp=-1.57;OR=8.03(95%C.I.=3.11-Inf)	2631.para.1	CPB1;CPA3;CPA2;CPA4;CPA1;CPA5;CPB2;CPA6
	7	130024436	C	CPA1	+	ENST00000011292	252	D	Family-wise	PER1	adj-p=2.68e-02;logp=-1.57;OR=8.03(95%C.I.=3.11-Inf)	2631.para.1	CPB1;CPA3;CPA2;CPA4;CPA1;CPA5;CPB2;CPA6
	7	130024437	C	CPA1	+	ENST00000011292	253	P	Family-wise	PER1	adj-p=2.68e-02;logp=-1.57;OR=8.03(95%C.I.=3.11-Inf)	2631.para.1	CPB1;CPA3;CPA2;CPA4;CPA1;CPA5;CPB2;CPA6
	7	130024438	C	CPA1	+	ENST00000011292	253	P	Family-wise	PER1	adj-p=2.68e-02;logp=-1.57;OR=8.03(95%C.I.=3.11-Inf)	2631.para.1	CPB1;CPA3;CPA2;CPA4;CPA1;CPA5;CPB2;CPA6
	7	130024439	C	CPA1	+	ENST00000011292	253	P	Family-wise	PER1	adj-p=2.68e-02;logp=-1.57;OR=8.03(95%C.I.=3.11-Inf)	2631.para.1	CPB1;CPA3;CPA2;CPA4;CPA1;CPA5;CPB2;CPA6
	7	130024440	A	CPA1	+	ENST00000011292	254	N	Family-wise	PER1	adj-p=2.68e-02;logp=-1.57;OR=8.03(95%C.I.=3.11-Inf)	2631.para.1	CPB1;CPA3;CPA2;CPA4;CPA1;CPA5;CPB2;CPA6
	7	130024441	A	CPA1	+	ENST00000011292	254	N	Family-wise	PER1	adj-p=2.68e-02;logp=-1.57;OR=8.03(95%C.I.=3.11-Inf)	2631.para.1	CPB1;CPA3;CPA2;CPA4;CPA1;CPA5;CPB2;CPA6
	7	130024442	C	CPA1	+	ENST00000011292	254	N	Family-wise	PER1	adj-p=2.68e-02;logp=-1.57;OR=8.03(95%C.I.=3.11-Inf)	2631.para.1	CPB1;CPA3;CPA2;CPA4;CPA1;CPA5;CPB2;CPA6
	7	130024443	A	CPA1	+	ENST00000011292	255	R	Family-wise	PER1	adj-p=2.68e-02;logp=-1.57;OR=8.03(95%C.I.=3.11-Inf)	2631.para.1	CPB1;CPA3;CPA2;CPA4;CPA1;CPA5;CPB2;CPA6
	7	130024444	G	CPA1	+	ENST00000011292	255	R	Family-wise	PER1	adj-p=2.68e-02;logp=-1.57;OR=8.03(95%C.I.=3.11-Inf)	2631.para.1	CPB1;CPA3;CPA2;CPA4;CPA1;CPA5;CPB2;CPA6
	7	130024445	G	CPA1	+	ENST00000011292	255	R	Family-wise	PER1	adj-p=2.68e-02;logp=-1.57;OR=8.03(95%C.I.=3.11-Inf)	2631.para.1	CPB1;CPA3;CPA2;CPA4;CPA1;CPA5;CPB2;CPA6
	1	171605481	C	MYOC	-	ENST00000037502	367	G	Family-wise	PER1	adj-p=3.90e-02;logp=-1.41;OR=11.94(95%C.I.=3.71-Inf)	1467.para.1	OLFM4;GLDN;OLFM1;OLFM3;OLFM2;MYOC
	1	171605480	C	MYOC	-	ENST00000037502	367	G	Family-wise	PER1	adj-p=3.90e-02;logp=-1.41;OR=11.94(95%C.I.=3.71-Inf)	1467.para.1	OLFM4;GLDN;OLFM1;OLFM3;OLFM2;MYOC
	1	171605479	T	MYOC	-	ENST00000037502	367	G	Family-wise	PER1	adj-p=3.90e-02;logp=-1.41;OR=11.94(95%C.I.=3.71-Inf)	1467.para.1	OLFM4;GLDN;OLFM1;OLFM3;OLFM2;MYOC
	1	171605478	G	MYOC	-	ENST00000037502	368	Q	Family-wise	PER1	adj-p=3.90e-02;logp=-1.41;OR=11.94(95%C.I.=3.71-Inf)	1467.para.1	OLFM4;GLDN;OLFM1;OLFM3;OLFM2;MYOC
	1	171605477	T	MYOC	-	ENST00000037502	368	Q	Family-wise	PER1	adj-p=3.90e-02;logp=-1.41;OR=11.94(95%C.I.=3.71-Inf)	1467.para.1	OLFM4;GLDN;OLFM1;OLFM3;OLFM2;MYOC
	1	171605476	C	MYOC	-	ENST00000037502	368	Q	Family-wise	PER1	adj-p=3.90e-02;logp=-1.41;OR=11.94(95%C.I.=3.71-Inf)	1467.para.1	OLFM4;GLDN;OLFM1;OLFM3;OLFM2;MYOC
	1	171605475	A	MYOC	-	ENST00000037502	369	F	Family-wise	PER1	adj-p=3.90e-02;logp=-1.41;OR=11.94(95%C.I.=3.71-Inf)	1467.para.1	OLFM4;GLDN;OLFM1;OLFM3;OLFM2;MYOC
	1	171605474	A	MYOC	-	ENST00000037502	369	F	Family-wise	PER1	adj-p=3.90e-02;logp=-1.41;OR=11.94(95%C.I.=3.71-Inf)	1467.para.1	OLFM4;GLDN;OLFM1;OLFM3;OLFM2;MYOC
	1	171605473	G	MYOC	-	ENST00000037502	369	F	Family-wise	PER1	adj-p=3.90e-02;logp=-1.41;OR=11.94(95%C.I.=3.71-Inf)	1467.para.1	OLFM4;GLDN;OLFM1;OLFM3;OLFM2;MYOC
	1	171605472	G	MYOC	-	ENST00000037502	370	P	Family-wise	PER1	adj-p=3.90e-02;logp=-1.41;OR=11.94(95%C.I.=3.71-Inf)	1467.para.1	OLFM4;GLDN;OLFM1;OLFM3;OLFM2;MYOC
	1	171605471	G	MYOC	-	ENST00000037502	370	P	Family-wise	PER1	adj-p=3.90e-02;logp=-1.41;OR=11.94(95%C.I.=3.71-Inf)	1467.para.1	OLFM4;GLDN;OLFM1;OLFM3;OLFM2;MYOC
	1	171605470	C	MYOC	-	ENST00000037502	370	P	Family-wise	PER1	adj-p=3.90e-02;logp=-1.41;OR=11.94(95%C.I.=3.71-Inf)	1467.para.1	OLFM4;GLDN;OLFM1;OLFM3;OLFM2;MYOC
	1	171605469	A	MYOC	-	ENST00000037502	371	Y	Family-wise	PER1	adj-p=3.90e-02;logp=-1.41;OR=11.94(95%C.I.=3.71-Inf)	1467.para.1	OLFM4;GLDN;OLFM1;OLFM3;OLFM2;MYOC
	1	171605468	T	MYOC	-	ENST00000037502	371	Y	Family-wise	PER1	adj-p=3.90e-02;logp=-1.41;OR=11.94(95%C.I.=3.71-Inf)	1467.para.1	OLFM4;GLDN;OLFM1;OLFM3;OLFM2;MYOC
	1	171605467	A	MYOC	-	ENST00000037502	371	Y	Family-wise	PER1	adj-p=3.90e-02;logp=-1.41;OR=11.94(95%C.I.=3.71-Inf)	1467.para.1	OLFM4;GLDN;OLFM1;OLFM3;OLFM2;MYOC
	1	171605466	A	MYOC	-	ENST00000037502	372	S	Family-wise	PER1	adj-p=3.90e-02;logp=-1.41;OR=11.94(95%C.I.=3.71-Inf)	1467.para.1	OLFM4;GLDN;OLFM1;OLFM3;OLFM2;MYOC
	1	171605465	G	MYOC	-	ENST00000037502	372	S	Family-wise	PER1	adj-p=3.90e-02;logp=-1.41;OR=11.94(95%C.I.=3.71-Inf)	1467.para.1	OLFM4;GLDN;OLFM1;OLFM3;OLFM2;MYOC
	1	171605464	A	MYOC	-	ENST00000037502	372	S	Family-wise	PER1	adj-p=3.90e-02;logp=-1.41;OR=11.94(95%C.I.=3.71-Inf)	1467.para.1	OLFM4;GLDN;OLFM1;OLFM3;OLFM2;MYOC
	1	171605463	A	MYOC	-	ENST00000037502	373	W	Family-wise	PER1	adj-p=3.90e-02;logp=-1.41;OR=11.94(95%C.I.=3.71-Inf)	1467.para.1	OLFM4;GLDN;OLFM1;OLFM3;OLFM2;MYOC
	1	171605462	C	MYOC	-	ENST00000037502	373	W	Family-wise	PER1	adj-p=3.90e-02;logp=-1.41;OR=11.94(95%C.I.=3.71-Inf)	1467.para.1	OLFM4;GLDN;OLFM1;OLFM3;OLFM2;MYOC
	1	171605461	C	MYOC	-	ENST00000037502	373	W	Family-wise	PER1	adj-p=3.90e-02;logp=-1.41;OR=11.94(95%C.I.=3.71-Inf)	1467.para.1	OLFM4;GLDN;OLFM1;OLFM3;OLFM2;MYOC
	1	171605460	C	MYOC	-	ENST00000037502	374	G	Family-wise	PER1	adj-p=3.90e-02;logp=-1.41;OR=11.94(95%C.I.=3.71-Inf)	1467.para.1	OLFM4;GLDN;OLFM1;OLFM3;OLFM2;MYOC
	1	171605459	C	MYOC	-	ENST00000037502	374	G	Family-wise	PER1	adj-p=3.90e-02;logp=-1.41;OR=11.94(95%C.I.=3.71-Inf)	1467.para.1	OLFM4;GLDN;OLFM1;OLFM3;OLFM2;MYOC
	1	171605458	A	MYOC	-	ENST00000037502	374	G	Family-wise	PER1	adj-p=3.90e-02;logp=-1.41;OR=11.94(95%C.I.=3.71-Inf)	1467.para.1	OLFM4;GLDN;OLFM1;OLFM3;OLFM2;MYOC
	1	171605457	C	MYOC	-	ENST00000037502	375	G	Family-wise	PER1	adj-p=3.90e-02;logp=-1.41;OR=11.94(95%C.I.=3.71-Inf)	1467.para.1	OLFM4;GLDN;OLFM1;OLFM3;OLFM2;MYOC
	1	171605456	C	MYOC	-	ENST00000037502	375	G	Family-wise	PER1	adj-p=3.90e-02;logp=-1.41;OR=11.94(95%C.I.=3.71-Inf)	1467.para.1	OLFM4;GLDN;OLFM1;OLFM3;OLFM2;MYOC
	1	171605455	G	MYOC	-	ENST00000037502	375	G	Family-wise	PER1	adj-p=3.90e-02;logp=-1.41;OR=11.94(95%C.I.=3.71-Inf)	1467.para.1	OLFM4;GLDN;OLFM1;OLFM3;OLFM2;MYOC
	1	171605316	G	MYOC	-	ENST00000037502	422	R	Family-wise	PER2	adj-p=4.50e-03;logp=-2.35;OR=10.53(95%C.I.=4.10-Inf)	1467.para.1	OLFM4;GLDN;OLFM1;OLFM3;OLFM2;MYOC
	1	171605315	C	MYOC	-	ENST00000037502	422	R	Family-wise	PER2	adj-p=4.50e-03;logp=-2.35;OR=10.53(95%C.I.=4.10-Inf)	1467.para.1	OLFM4;GLDN;OLFM1;OLFM3;OLFM2;MYOC
	1	171605314	A	MYOC	-	ENST00000037502	422	R	Family-wise	PER2	adj-p=4.50e-03;logp=-2.35;OR=10.53(95%C.I.=4.10-Inf)	1467.para.1	OLFM4;GLDN;OLFM1;OLFM3;OLFM2;MYOC
	1	171605313	T	MYOC	-	ENST00000037502	423	K	Family-wise	PER2	adj-p=4.50e-03;logp=-2.35;OR=10.53(95%C.I.=4.10-Inf)	1467.para.1	OLFM4;GLDN;OLFM1;OLFM3;OLFM2;MYOC
	1	171605312	T	MYOC	-	ENST00000037502	423	K	Family-wise	PER2	adj-p=4.50e-03;logp=-2.35;OR=10.53(95%C.I.=4.10-Inf)	1467.para.1	OLFM4;GLDN;OLFM1;OLFM3;OLFM2;MYOC
	1	171605311	C	MYOC	-	ENST00000037502	423	K	Family-wise	PER2	adj-p=4.50e-03;logp=-2.35;OR=10.53(95%C.I.=4.10-Inf)	1467.para.1	OLFM4;GLDN;OLFM1;OLFM3;OLFM2;MYOC
	1	171605310	G	MYOC	-	ENST00000037502	424	Q	Family-wise	PER2	adj-p=4.50e-03;logp=-2.35;OR=10.53(95%C.I.=4.10-Inf)	1467.para.1	OLFM4;GLDN;OLFM1;OLFM3;OLFM2;MYOC
	1	171605309	T	MYOC	-	ENST00000037502	424	Q	Family-wise	PER2	adj-p=4.50e-03;logp=-2.35;OR=10.53(95%C.I.=4.10-Inf)	1467.para.1	OLFM4;GLDN;OLFM1;OLFM3;OLFM2;MYOC
	1	171605308	C	MYOC	-	ENST00000037502	424	Q	Family-wise	PER2	adj-p=4.50e-03;logp=-2.35;OR=10.53(95%C.I.=4.10-Inf)	1467.para.1	OLFM4;GLDN;OLFM1;OLFM3;OLFM2;MYOC
	1	171605307	A	MYOC	-	ENST00000037502	425	S	Family-wise	PER2	adj-p=4.50e-03;logp=-2.35;OR=10.53(95%C.I.=4.10-Inf)	1467.para.1	OLFM4;GLDN;OLFM1;OLFM3;OLFM2;MYOC
	1	171605306	G	MYOC	-	ENST00000037502	425	S	Family-wise	PER2	adj-p=4.50e-03;logp=-2.35;OR=10.53(95%C.I.=4.10-Inf)	1467.para.1	OLFM4;GLDN;OLFM1;OLFM3;OLFM2;MYOC
	1	171605305	T	MYOC	-	ENST00000037502	425	S	Family-wise	PER2	adj-p=4.50e-03;logp=-2.35;OR=10.53(95%C.I.=4.10-Inf)	1467.para.1	OLFM4;GLDN;OLFM1;OLFM3;OLFM2;MYOC
	1	171605304	C	MYOC	-	ENST00000037502	426	V	Family-wise	PER2	adj-p=4.50e-03;logp=-2.35;OR=10.53(95%C.I.=4.10-Inf)	1467.para.1	OLFM4;GLDN;OLFM1;OLFM3;OLFM2;MYOC
	1	171605303	A	MYOC	-	ENST00000037502	426	V	Family-wise	PER2	adj-p=4.50e-03;logp=-2.35;OR=10.53(95%C.I.=4.10-Inf)	1467.para.1	OLFM4;GLDN;OLFM1;OLFM3;OLFM2;MYOC
	1	171605302	G	MYOC	-	ENST00000037502	426	V	Family-wise	PER2	adj-p=4.50e-03;logp=-2.35;OR=10.53(95%C.I.=4.10-Inf)	1467.para.1	OLFM4;GLDN;OLFM1;OLFM3;OLFM2;MYOC
	1	171605301	C	MYOC	-	ENST00000037502	427	A	Family-wise	PER2	adj-p=4.50e-03;logp=-2.35;OR=10.53(95%C.I.=4.10-Inf)	1467.para.1	OLFM4;GLDN;OLFM1;OLFM3;OLFM2;MYOC
	1	171605300	G	MYOC	-	ENST00000037502	427	A	Family-wise	PER2	adj-p=4.50e-03;logp=-2.35;OR=10.53(95%C.I.=4.10-Inf)	1467.para.1	OLFM4;GLDN;OLFM1;OLFM3;OLFM2;MYOC
	1	171605299	G	MYOC	-	ENST00000037502	427	A	Family-wise	PER2	adj-p=4.50e-03;logp=-2.35;OR=10.53(95%C.I.=4.10-Inf)	1467.para.1	OLFM4;GLDN;OLFM1;OLFM3;OLFM2;MYOC
	1	171605298	T	MYOC	-	ENST00000037502	428	N	Family-wise	PER2	adj-p=4.50e-03;logp=-2.35;OR=10.53(95%C.I.=4.10-Inf)	1467.para.1	OLFM4;GLDN;OLFM1;OLFM3;OLFM2;MYOC
	1	171605297	T	MYOC	-	ENST00000037502	428	N	Family-wise	PER2	adj-p=4.50e-03;logp=-2.35;OR=10.53(95%C.I.=4.10-Inf)	1467.para.1	OLFM4;GLDN;OLFM1;OLFM3;OLFM2;MYOC
	1	171605296	A	MYOC	-	ENST00000037502	428	N	Family-wise	PER2	adj-p=4.50e-03;logp=-2.35;OR=10.53(95%C.I.=4.10-Inf)	1467.para.1	OLFM4;GLDN;OLFM1;OLFM3;OLFM2;MYOC
	1	171605295	C	MYOC	-	ENST00000037502	429	A	Family-wise	PER2	adj-p=4.50e-03;logp=-2.35;OR=10.53(95%C.I.=4.10-Inf)	1467.para.1	OLFM4;GLDN;OLFM1;OLFM3;OLFM2;MYOC
	1	171605294	G	MYOC	-	ENST00000037502	429	A	Family-wise	PER2	adj-p=4.50e-03;logp=-2.35;OR=10.53(95%C.I.=4.10-Inf)	1467.para.1	OLFM4;GLDN;OLFM1;OLFM3;OLFM2;MYOC
	1	171605293	G	MYOC	-	ENST00000037502	429	A	Family-wise	PER2	adj-p=4.50e-03;logp=-2.35;OR=10.53(95%C.I.=4.10-Inf)	1467.para.1	OLFM4;GLDN;OLFM1;OLFM3;OLFM2;MYOC
	1	171605292	A	MYOC	-	ENST00000037502	430	F	Family-wise	PER2	adj-p=4.50e-03;logp=-2.35;OR=10.53(95%C.I.=4.10-Inf)	1467.para.1	OLFM4;GLDN;OLFM1;OLFM3;OLFM2;MYOC
	1	171605291	A	MYOC	-	ENST00000037502	430	F	Family-wise	PER2	adj-p=4.50e-03;logp=-2.35;OR=10.53(95%C.I.=4.10-Inf)	1467.para.1	OLFM4;GLDN;OLFM1;OLFM3;OLFM2;MYOC
	1	171605290	G	MYOC	-	ENST00000037502	430	F	Family-wise	PER2	adj-p=4.50e-03;logp=-2.35;OR=10.53(95%C.I.=4.10-Inf)	1467.para.1	OLFM4;GLDN;OLFM1;OLFM3;OLFM2;MYOC
	1	171605289	T	MYOC	-	ENST00000037502	431	I	Family-wise	PER2	adj-p=9.09e-03;logp=-2.04;OR=9.11(95%C.I.=3.62-Inf)	1467.para.1	OLFM4;GLDN;OLFM1;OLFM3;OLFM2;MYOC
	1	171605288	A	MYOC	-	ENST00000037502	431	I	Family-wise	PER2	adj-p=9.09e-03;logp=-2.04;OR=9.11(95%C.I.=3.62-Inf)	1467.para.1	OLFM4;GLDN;OLFM1;OLFM3;OLFM2;MYOC
	1	171605287	G	MYOC	-	ENST00000037502	431	I	Family-wise	PER2	adj-p=9.09e-03;logp=-2.04;OR=9.11(95%C.I.=3.62-Inf)	1467.para.1	OLFM4;GLDN;OLFM1;OLFM3;OLFM2;MYOC
	1	171605286	T	MYOC	-	ENST00000037502	432	I	Family-wise	PER2	adj-p=9.09e-03;logp=-2.04;OR=9.11(95%C.I.=3.62-Inf)	1467.para.1	OLFM4;GLDN;OLFM1;OLFM3;OLFM2;MYOC
	1	171605285	A	MYOC	-	ENST00000037502	432	I	Family-wise	PER2	adj-p=9.09e-03;logp=-2.04;OR=9.11(95%C.I.=3.62-Inf)	1467.para.1	OLFM4;GLDN;OLFM1;OLFM3;OLFM2;MYOC
	1	171605284	G	MYOC	-	ENST00000037502	432	I	Family-wise	PER2	adj-p=9.09e-03;logp=-2.04;OR=9.11(95%C.I.=3.62-Inf)	1467.para.1	OLFM4;GLDN;OLFM1;OLFM3;OLFM2;MYOC
	1	171605283	A	MYOC	-	ENST00000037502	433	C	Family-wise	PER2	adj-p=9.09e-03;logp=-2.04;OR=9.11(95%C.I.=3.62-Inf)	1467.para.1	OLFM4;GLDN;OLFM1;OLFM3;OLFM2;MYOC
	1	171605282	C	MYOC	-	ENST00000037502	433	C	Family-wise	PER2	adj-p=9.09e-03;logp=-2.04;OR=9.11(95%C.I.=3.62-Inf)	1467.para.1	OLFM4;GLDN;OLFM1;OLFM3;OLFM2;MYOC
	1	171605281	A	MYOC	-	ENST00000037502	433	C	Family-wise	PER2	adj-p=9.09e-03;logp=-2.04;OR=9.11(95%C.I.=3.62-Inf)	1467.para.1	OLFM4;GLDN;OLFM1;OLFM3;OLFM2;MYOC
	1	171605280	C	MYOC	-	ENST00000037502	434	G	Family-wise	PER2	adj-p=9.09e-03;logp=-2.04;OR=9.11(95%C.I.=3.62-Inf)	1467.para.1	OLFM4;GLDN;OLFM1;OLFM3;OLFM2;MYOC
	1	171605279	C	MYOC	-	ENST00000037502	434	G	Family-wise	PER2	adj-p=9.09e-03;logp=-2.04;OR=9.11(95%C.I.=3.62-Inf)	1467.para.1	OLFM4;GLDN;OLFM1;OLFM3;OLFM2;MYOC
	1	171605278	G	MYOC	-	ENST00000037502	434	G	Family-wise	PER2	adj-p=9.09e-03;logp=-2.04;OR=9.11(95%C.I.=3.62-Inf)	1467.para.1	OLFM4;GLDN;OLFM1;OLFM3;OLFM2;MYOC
	1	171605277	T	MYOC	-	ENST00000037502	435	T	Family-wise	PER2	adj-p=9.09e-03;logp=-2.04;OR=9.11(95%C.I.=3.62-Inf)	1467.para.1	OLFM4;GLDN;OLFM1;OLFM3;OLFM2;MYOC
	1	171605276	G	MYOC	-	ENST00000037502	435	T	Family-wise	PER2	adj-p=9.09e-03;logp=-2.04;OR=9.11(95%C.I.=3.62-Inf)	1467.para.1	OLFM4;GLDN;OLFM1;OLFM3;OLFM2;MYOC
	1	171605275	G	MYOC	-	ENST00000037502	435	T	Family-wise	PER2	adj-p=9.09e-03;logp=-2.04;OR=9.11(95%C.I.=3.62-Inf)	1467.para.1	OLFM4;GLDN;OLFM1;OLFM3;OLFM2;MYOC
	1	7837316	G	VAMP3	+	ENST00000054666	57	A	Family-wise	PER1	adj-p=1.39e-02;logp=-1.86;OR=60.29(95%C.I.=6.26-Inf)	1582.para.1	VAMP1;VAMP2;VAMP3;VAMP4;VAMP8
	1	7837317	C	VAMP3	+	ENST00000054666	57	A	Family-wise	PER1	adj-p=1.39e-02;logp=-1.86;OR=60.29(95%C.I.=6.26-Inf)	1582.para.1	VAMP1;VAMP2;VAMP3;VAMP4;VAMP8
	1	7837318	T	VAMP3	+	ENST00000054666	57	A	Family-wise	PER1	adj-p=1.39e-02;logp=-1.86;OR=60.29(95%C.I.=6.26-Inf)	1582.para.1	VAMP1;VAMP2;VAMP3;VAMP4;VAMP8
	1	7837319	T	VAMP3	+	ENST00000054666	58	S	Family-wise	PER1	adj-p=1.39e-02;logp=-1.86;OR=60.29(95%C.I.=6.26-Inf)	1582.para.1	VAMP1;VAMP2;VAMP3;VAMP4;VAMP8
	1	7837320	C	VAMP3	+	ENST00000054666	58	S	Family-wise	PER1	adj-p=1.39e-02;logp=-1.86;OR=60.29(95%C.I.=6.26-Inf)	1582.para.1	VAMP1;VAMP2;VAMP3;VAMP4;VAMP8
	1	7837321	T	VAMP3	+	ENST00000054666	58	S	Family-wise	PER1	adj-p=1.39e-02;logp=-1.86;OR=60.29(95%C.I.=6.26-Inf)	1582.para.1	VAMP1;VAMP2;VAMP3;VAMP4;VAMP8
	1	7837322	C	VAMP3	+	ENST00000054666	59	Q	Family-wise	PER1	adj-p=1.39e-02;logp=-1.86;OR=60.29(95%C.I.=6.26-Inf)	1582.para.1	VAMP1;VAMP2;VAMP3;VAMP4;VAMP8
	1	7837323	A	VAMP3	+	ENST00000054666	59	Q	Family-wise	PER1	adj-p=1.39e-02;logp=-1.86;OR=60.29(95%C.I.=6.26-Inf)	1582.para.1	VAMP1;VAMP2;VAMP3;VAMP4;VAMP8
	1	7837324	A	VAMP3	+	ENST00000054666	59	Q	Family-wise	PER1	adj-p=1.39e-02;logp=-1.86;OR=60.29(95%C.I.=6.26-Inf)	1582.para.1	VAMP1;VAMP2;VAMP3;VAMP4;VAMP8
	1	7837325	T	VAMP3	+	ENST00000054666	60	F	Family-wise	PER1	adj-p=1.39e-02;logp=-1.86;OR=60.29(95%C.I.=6.26-Inf)	1582.para.1	VAMP1;VAMP2;VAMP3;VAMP4;VAMP8
	1	7837326	T	VAMP3	+	ENST00000054666	60	F	Family-wise	PER1	adj-p=1.39e-02;logp=-1.86;OR=60.29(95%C.I.=6.26-Inf)	1582.para.1	VAMP1;VAMP2;VAMP3;VAMP4;VAMP8
	1	7837327	T	VAMP3	+	ENST00000054666	60	F	Family-wise	PER1	adj-p=1.39e-02;logp=-1.86;OR=60.29(95%C.I.=6.26-Inf)	1582.para.1	VAMP1;VAMP2;VAMP3;VAMP4;VAMP8
	1	7837328	G	VAMP3	+	ENST00000054666	61	E	Family-wise	PER1	adj-p=1.39e-02;logp=-1.86;OR=60.29(95%C.I.=6.26-Inf)	1582.para.1	VAMP1;VAMP2;VAMP3;VAMP4;VAMP8
	1	7837329	A	VAMP3	+	ENST00000054666	61	E	Family-wise	PER1	adj-p=1.39e-02;logp=-1.86;OR=60.29(95%C.I.=6.26-Inf)	1582.para.1	VAMP1;VAMP2;VAMP3;VAMP4;VAMP8
	1	7837330	A	VAMP3	+	ENST00000054666	61	E	Family-wise	PER1	adj-p=1.39e-02;logp=-1.86;OR=60.29(95%C.I.=6.26-Inf)	1582.para.1	VAMP1;VAMP2;VAMP3;VAMP4;VAMP8
	1	7837331	A	VAMP3	+	ENST00000054666	62	T	Family-wise	PER1	adj-p=1.39e-02;logp=-1.86;OR=60.29(95%C.I.=6.26-Inf)	1582.para.1	VAMP1;VAMP2;VAMP3;VAMP4;VAMP8
	1	7837332	C	VAMP3	+	ENST00000054666	62	T	Family-wise	PER1	adj-p=1.39e-02;logp=-1.86;OR=60.29(95%C.I.=6.26-Inf)	1582.para.1	VAMP1;VAMP2;VAMP3;VAMP4;VAMP8
	1	7837333	G	VAMP3	+	ENST00000054666	62	T	Family-wise	PER1	adj-p=1.39e-02;logp=-1.86;OR=60.29(95%C.I.=6.26-Inf)	1582.para.1	VAMP1;VAMP2;VAMP3;VAMP4;VAMP8
	1	7837334	A	VAMP3	+	ENST00000054666	63	S	Family-wise	PER1	adj-p=1.39e-02;logp=-1.86;OR=60.29(95%C.I.=6.26-Inf)	1582.para.1	VAMP1;VAMP2;VAMP3;VAMP4;VAMP8
	1	7837335	G	VAMP3	+	ENST00000054666	63	S	Family-wise	PER1	adj-p=1.39e-02;logp=-1.86;OR=60.29(95%C.I.=6.26-Inf)	1582.para.1	VAMP1;VAMP2;VAMP3;VAMP4;VAMP8
	1	7837336	C	VAMP3	+	ENST00000054666	63	S	Family-wise	PER1	adj-p=1.39e-02;logp=-1.86;OR=60.29(95%C.I.=6.26-Inf)	1582.para.1	VAMP1;VAMP2;VAMP3;VAMP4;VAMP8
	1	7837337	G	VAMP3	+	ENST00000054666	64	A	Family-wise	PER1	adj-p=1.39e-02;logp=-1.86;OR=60.29(95%C.I.=6.26-Inf)	1582.para.1	VAMP1;VAMP2;VAMP3;VAMP4;VAMP8
	1	7837338	C	VAMP3	+	ENST00000054666	64	A	Family-wise	PER1	adj-p=1.39e-02;logp=-1.86;OR=60.29(95%C.I.=6.26-Inf)	1582.para.1	VAMP1;VAMP2;VAMP3;VAMP4;VAMP8
	1	7837339	A	VAMP3	+	ENST00000054666	64	A	Family-wise	PER1	adj-p=1.39e-02;logp=-1.86;OR=60.29(95%C.I.=6.26-Inf)	1582.para.1	VAMP1;VAMP2;VAMP3;VAMP4;VAMP8
	1	7837340	G	VAMP3	+	ENST00000054666	65	A	Family-wise	PER1	adj-p=1.39e-02;logp=-1.86;OR=60.29(95%C.I.=6.26-Inf)	1582.para.1	VAMP1;VAMP2;VAMP3;VAMP4;VAMP8
	1	7837341	C	VAMP3	+	ENST00000054666	65	A	Family-wise	PER1	adj-p=1.39e-02;logp=-1.86;OR=60.29(95%C.I.=6.26-Inf)	1582.para.1	VAMP1;VAMP2;VAMP3;VAMP4;VAMP8
	1	7837342	C	VAMP3	+	ENST00000054666	65	A	Family-wise	PER1	adj-p=1.39e-02;logp=-1.86;OR=60.29(95%C.I.=6.26-Inf)	1582.para.1	VAMP1;VAMP2;VAMP3;VAMP4;VAMP8
	12	32975541	G	PKP2	-	ENST00000070846	611	L	Family-wise	PER1	adj-p=3.42e-02;logp=-1.47;OR=12.70(95%C.I.=4.15-Inf)	3192.para.2	PKP2;PKP1;PKP3
	12	32975540	A	PKP2	-	ENST00000070846	611	L	Family-wise	PER1	adj-p=3.42e-02;logp=-1.47;OR=12.70(95%C.I.=4.15-Inf)	3192.para.2	PKP2;PKP1;PKP3
	12	32975539	A	PKP2	-	ENST00000070846	611	L	Family-wise	PER1	adj-p=3.42e-02;logp=-1.47;OR=12.70(95%C.I.=4.15-Inf)	3192.para.2	PKP2;PKP1;PKP3
	12	32975538	G	PKP2	-	ENST00000070846	612	H	Family-wise	PER1	adj-p=3.42e-02;logp=-1.47;OR=12.70(95%C.I.=4.15-Inf)	3192.para.2	PKP2;PKP1;PKP3
	12	32975537	T	PKP2	-	ENST00000070846	612	H	Family-wise	PER1	adj-p=3.42e-02;logp=-1.47;OR=12.70(95%C.I.=4.15-Inf)	3192.para.2	PKP2;PKP1;PKP3
	12	32975536	A	PKP2	-	ENST00000070846	612	H	Family-wise	PER1	adj-p=3.42e-02;logp=-1.47;OR=12.70(95%C.I.=4.15-Inf)	3192.para.2	PKP2;PKP1;PKP3
	12	32975535	T	PKP2	-	ENST00000070846	613	N	Family-wise	PER1	adj-p=3.42e-02;logp=-1.47;OR=12.70(95%C.I.=4.15-Inf)	3192.para.2	PKP2;PKP1;PKP3
	12	32975534	T	PKP2	-	ENST00000070846	613	N	Family-wise	PER1	adj-p=3.42e-02;logp=-1.47;OR=12.70(95%C.I.=4.15-Inf)	3192.para.2	PKP2;PKP1;PKP3
	12	32975533	G	PKP2	-	ENST00000070846	613	N	Family-wise	PER1	adj-p=3.42e-02;logp=-1.47;OR=12.70(95%C.I.=4.15-Inf)	3192.para.2	PKP2;PKP1;PKP3
	12	32975532	G	PKP2	-	ENST00000070846	614	L	Family-wise	PER1	adj-p=3.42e-02;logp=-1.47;OR=12.70(95%C.I.=4.15-Inf)	3192.para.2	PKP2;PKP1;PKP3
	12	32975531	A	PKP2	-	ENST00000070846	614	L	Family-wise	PER1	adj-p=3.42e-02;logp=-1.47;OR=12.70(95%C.I.=4.15-Inf)	3192.para.2	PKP2;PKP1;PKP3
	12	32975530	G	PKP2	-	ENST00000070846	614	L	Family-wise	PER1	adj-p=3.42e-02;logp=-1.47;OR=12.70(95%C.I.=4.15-Inf)	3192.para.2	PKP2;PKP1;PKP3
	12	32975529	A	PKP2	-	ENST00000070846	615	S	Family-wise	PER1	adj-p=3.42e-02;logp=-1.47;OR=12.70(95%C.I.=4.15-Inf)	3192.para.2	PKP2;PKP1;PKP3
	12	32975528	G	PKP2	-	ENST00000070846	615	S	Family-wise	PER1	adj-p=3.42e-02;logp=-1.47;OR=12.70(95%C.I.=4.15-Inf)	3192.para.2	PKP2;PKP1;PKP3
	12	32975527	G	PKP2	-	ENST00000070846	615	S	Family-wise	PER1	adj-p=3.42e-02;logp=-1.47;OR=12.70(95%C.I.=4.15-Inf)	3192.para.2	PKP2;PKP1;PKP3
	12	32975526	A	PKP2	-	ENST00000070846	616	Y	Family-wise	PER1	adj-p=3.42e-02;logp=-1.47;OR=12.70(95%C.I.=4.15-Inf)	3192.para.2	PKP2;PKP1;PKP3
	12	32975525	T	PKP2	-	ENST00000070846	616	Y	Family-wise	PER1	adj-p=3.42e-02;logp=-1.47;OR=12.70(95%C.I.=4.15-Inf)	3192.para.2	PKP2;PKP1;PKP3
	12	32975524	G	PKP2	-	ENST00000070846	616	Y	Family-wise	PER1	adj-p=3.42e-02;logp=-1.47;OR=12.70(95%C.I.=4.15-Inf)	3192.para.2	PKP2;PKP1;PKP3
	12	32975523	G	PKP2	-	ENST00000070846	617	Q	Family-wise	PER1	adj-p=3.42e-02;logp=-1.47;OR=12.70(95%C.I.=4.15-Inf)	3192.para.2	PKP2;PKP1;PKP3
	12	32975522	T	PKP2	-	ENST00000070846	617	Q	Family-wise	PER1	adj-p=3.42e-02;logp=-1.47;OR=12.70(95%C.I.=4.15-Inf)	3192.para.2	PKP2;PKP1;PKP3
	12	32975521	C	PKP2	-	ENST00000070846	617	Q	Family-wise	PER1	adj-p=3.42e-02;logp=-1.47;OR=12.70(95%C.I.=4.15-Inf)	3192.para.2	PKP2;PKP1;PKP3
	12	32975520	G	PKP2	-	ENST00000070846	618	L	Family-wise	PER1	adj-p=3.42e-02;logp=-1.47;OR=12.70(95%C.I.=4.15-Inf)	3192.para.2	PKP2;PKP1;PKP3
	12	32975519	A	PKP2	-	ENST00000070846	618	L	Family-wise	PER1	adj-p=3.42e-02;logp=-1.47;OR=12.70(95%C.I.=4.15-Inf)	3192.para.2	PKP2;PKP1;PKP3
	12	32975518	C	PKP2	-	ENST00000070846	618	L	Family-wise	PER1	adj-p=3.42e-02;logp=-1.47;OR=12.70(95%C.I.=4.15-Inf)	3192.para.2	PKP2;PKP1;PKP3
	12	32975517	C	PKP2	-	ENST00000070846	619	E	Family-wise	PER1	adj-p=3.42e-02;logp=-1.47;OR=12.70(95%C.I.=4.15-Inf)	3192.para.2	PKP2;PKP1;PKP3
	12	32975516	T	PKP2	-	ENST00000070846	619	E	Family-wise	PER1	adj-p=3.42e-02;logp=-1.47;OR=12.70(95%C.I.=4.15-Inf)	3192.para.2	PKP2;PKP1;PKP3
	12	32975515	C	PKP2	-	ENST00000070846	619	E	Family-wise	PER1	adj-p=3.42e-02;logp=-1.47;OR=12.70(95%C.I.=4.15-Inf)	3192.para.2	PKP2;PKP1;PKP3
	19	3094776	C	GNA11	+	ENST00000078429	43	L	Family-wise	PER1	adj-p=8.66e-03;logp=-2.06;OR=10.25(95%C.I.=3.80-Inf)	2507.para.1	GNA11;GNAQ;GNA14;GNA15;GNAI1;GNAI3;GNAI2;GNAO1;GNAT2;GNAT1;GNAT3;GNAZ
	19	3094777	T	GNA11	+	ENST00000078429	43	L	Family-wise	PER1	adj-p=8.66e-03;logp=-2.06;OR=10.25(95%C.I.=3.80-Inf)	2507.para.1	GNA11;GNAQ;GNA14;GNA15;GNAI1;GNAI3;GNAI2;GNAO1;GNAT2;GNAT1;GNAT3;GNAZ
	19	3094778	G	GNA11	+	ENST00000078429	43	L	Family-wise	PER1	adj-p=8.66e-03;logp=-2.06;OR=10.25(95%C.I.=3.80-Inf)	2507.para.1	GNA11;GNAQ;GNA14;GNA15;GNAI1;GNAI3;GNAI2;GNAO1;GNAT2;GNAT1;GNAT3;GNAZ
	19	3094779	C	GNA11	+	ENST00000078429	44	L	Family-wise	PER1	adj-p=8.66e-03;logp=-2.06;OR=10.25(95%C.I.=3.80-Inf)	2507.para.1	GNA11;GNAQ;GNA14;GNA15;GNAI1;GNAI3;GNAI2;GNAO1;GNAT2;GNAT1;GNAT3;GNAZ
	19	3094780	T	GNA11	+	ENST00000078429	44	L	Family-wise	PER1	adj-p=8.66e-03;logp=-2.06;OR=10.25(95%C.I.=3.80-Inf)	2507.para.1	GNA11;GNAQ;GNA14;GNA15;GNAI1;GNAI3;GNAI2;GNAO1;GNAT2;GNAT1;GNAT3;GNAZ
	19	3094781	G	GNA11	+	ENST00000078429	44	L	Family-wise	PER1	adj-p=8.66e-03;logp=-2.06;OR=10.25(95%C.I.=3.80-Inf)	2507.para.1	GNA11;GNAQ;GNA14;GNA15;GNAI1;GNAI3;GNAI2;GNAO1;GNAT2;GNAT1;GNAT3;GNAZ
	19	3094782	C	GNA11	+	ENST00000078429	45	L	Family-wise	PER1	adj-p=8.66e-03;logp=-2.06;OR=10.25(95%C.I.=3.80-Inf)	2507.para.1	GNA11;GNAQ;GNA14;GNA15;GNAI1;GNAI3;GNAI2;GNAO1;GNAT2;GNAT1;GNAT3;GNAZ
	19	3094783	T	GNA11	+	ENST00000078429	45	L	Family-wise	PER1	adj-p=8.66e-03;logp=-2.06;OR=10.25(95%C.I.=3.80-Inf)	2507.para.1	GNA11;GNAQ;GNA14;GNA15;GNAI1;GNAI3;GNAI2;GNAO1;GNAT2;GNAT1;GNAT3;GNAZ
	19	3094784	C	GNA11	+	ENST00000078429	45	L	Family-wise	PER1	adj-p=8.66e-03;logp=-2.06;OR=10.25(95%C.I.=3.80-Inf)	2507.para.1	GNA11;GNAQ;GNA14;GNA15;GNAI1;GNAI3;GNAI2;GNAO1;GNAT2;GNAT1;GNAT3;GNAZ
	19	3110146	G	GNA11	+	ENST00000078429	46	G	Family-wise	PER1	adj-p=8.66e-03;logp=-2.06;OR=10.25(95%C.I.=3.80-Inf)	2507.para.1	GNA11;GNAQ;GNA14;GNA15;GNAI1;GNAI3;GNAI2;GNAO1;GNAT2;GNAT1;GNAT3;GNAZ
	19	3110147	G	GNA11	+	ENST00000078429	46	G	Family-wise	PER1	adj-p=8.66e-03;logp=-2.06;OR=10.25(95%C.I.=3.80-Inf)	2507.para.1	GNA11;GNAQ;GNA14;GNA15;GNAI1;GNAI3;GNAI2;GNAO1;GNAT2;GNAT1;GNAT3;GNAZ
	19	3110148	C	GNA11	+	ENST00000078429	46	G	Family-wise	PER1	adj-p=8.66e-03;logp=-2.06;OR=10.25(95%C.I.=3.80-Inf)	2507.para.1	GNA11;GNAQ;GNA14;GNA15;GNAI1;GNAI3;GNAI2;GNAO1;GNAT2;GNAT1;GNAT3;GNAZ
	19	3110149	A	GNA11	+	ENST00000078429	47	T	Family-wise	PER1	adj-p=8.66e-03;logp=-2.06;OR=10.25(95%C.I.=3.80-Inf)	2507.para.1	GNA11;GNAQ;GNA14;GNA15;GNAI1;GNAI3;GNAI2;GNAO1;GNAT2;GNAT1;GNAT3;GNAZ
	19	3110150	C	GNA11	+	ENST00000078429	47	T	Family-wise	PER1	adj-p=8.66e-03;logp=-2.06;OR=10.25(95%C.I.=3.80-Inf)	2507.para.1	GNA11;GNAQ;GNA14;GNA15;GNAI1;GNAI3;GNAI2;GNAO1;GNAT2;GNAT1;GNAT3;GNAZ
	19	3110151	G	GNA11	+	ENST00000078429	47	T	Family-wise	PER1	adj-p=8.66e-03;logp=-2.06;OR=10.25(95%C.I.=3.80-Inf)	2507.para.1	GNA11;GNAQ;GNA14;GNA15;GNAI1;GNAI3;GNAI2;GNAO1;GNAT2;GNAT1;GNAT3;GNAZ
	19	3110152	G	GNA11	+	ENST00000078429	48	G	Family-wise	PER1	adj-p=1.15e-05;logp=-4.94;OR=12.77(95%C.I.=5.92-Inf)	2507.para.1	GNA11;GNAQ;GNA14;GNA15;GNAI1;GNAI3;GNAI2;GNAO1;GNAT2;GNAT1;GNAT3;GNAZ
	19	3110153	G	GNA11	+	ENST00000078429	48	G	Family-wise	PER1	adj-p=1.15e-05;logp=-4.94;OR=12.77(95%C.I.=5.92-Inf)	2507.para.1	GNA11;GNAQ;GNA14;GNA15;GNAI1;GNAI3;GNAI2;GNAO1;GNAT2;GNAT1;GNAT3;GNAZ
	19	3110154	C	GNA11	+	ENST00000078429	48	G	Family-wise	PER1	adj-p=1.15e-05;logp=-4.94;OR=12.77(95%C.I.=5.92-Inf)	2507.para.1	GNA11;GNAQ;GNA14;GNA15;GNAI1;GNAI3;GNAI2;GNAO1;GNAT2;GNAT1;GNAT3;GNAZ
	19	3110155	G	GNA11	+	ENST00000078429	49	E	Family-wise	PER1	adj-p=1.15e-05;logp=-4.94;OR=12.77(95%C.I.=5.92-Inf)	2507.para.1	GNA11;GNAQ;GNA14;GNA15;GNAI1;GNAI3;GNAI2;GNAO1;GNAT2;GNAT1;GNAT3;GNAZ
	19	3110156	A	GNA11	+	ENST00000078429	49	E	Family-wise	PER1	adj-p=1.15e-05;logp=-4.94;OR=12.77(95%C.I.=5.92-Inf)	2507.para.1	GNA11;GNAQ;GNA14;GNA15;GNAI1;GNAI3;GNAI2;GNAO1;GNAT2;GNAT1;GNAT3;GNAZ
	19	3110157	G	GNA11	+	ENST00000078429	49	E	Family-wise	PER1	adj-p=1.15e-05;logp=-4.94;OR=12.77(95%C.I.=5.92-Inf)	2507.para.1	GNA11;GNAQ;GNA14;GNA15;GNAI1;GNAI3;GNAI2;GNAO1;GNAT2;GNAT1;GNAT3;GNAZ
	19	3110158	A	GNA11	+	ENST00000078429	50	S	Family-wise	PER1	adj-p=1.15e-05;logp=-4.94;OR=12.77(95%C.I.=5.92-Inf)	2507.para.1	GNA11;GNAQ;GNA14;GNA15;GNAI1;GNAI3;GNAI2;GNAO1;GNAT2;GNAT1;GNAT3;GNAZ
	19	3110159	G	GNA11	+	ENST00000078429	50	S	Family-wise	PER1	adj-p=1.15e-05;logp=-4.94;OR=12.77(95%C.I.=5.92-Inf)	2507.para.1	GNA11;GNAQ;GNA14;GNA15;GNAI1;GNAI3;GNAI2;GNAO1;GNAT2;GNAT1;GNAT3;GNAZ
	19	3110160	C	GNA11	+	ENST00000078429	50	S	Family-wise	PER1	adj-p=1.15e-05;logp=-4.94;OR=12.77(95%C.I.=5.92-Inf)	2507.para.1	GNA11;GNAQ;GNA14;GNA15;GNAI1;GNAI3;GNAI2;GNAO1;GNAT2;GNAT1;GNAT3;GNAZ
	19	3110161	G	GNA11	+	ENST00000078429	51	G	Family-wise	PER1	adj-p=1.15e-05;logp=-4.94;OR=12.77(95%C.I.=5.92-Inf)	2507.para.1	GNA11;GNAQ;GNA14;GNA15;GNAI1;GNAI3;GNAI2;GNAO1;GNAT2;GNAT1;GNAT3;GNAZ
	19	3110162	G	GNA11	+	ENST00000078429	51	G	Family-wise	PER1	adj-p=1.15e-05;logp=-4.94;OR=12.77(95%C.I.=5.92-Inf)	2507.para.1	GNA11;GNAQ;GNA14;GNA15;GNAI1;GNAI3;GNAI2;GNAO1;GNAT2;GNAT1;GNAT3;GNAZ
	19	3110163	G	GNA11	+	ENST00000078429	51	G	Family-wise	PER1	adj-p=1.15e-05;logp=-4.94;OR=12.77(95%C.I.=5.92-Inf)	2507.para.1	GNA11;GNAQ;GNA14;GNA15;GNAI1;GNAI3;GNAI2;GNAO1;GNAT2;GNAT1;GNAT3;GNAZ
	19	3110164	A	GNA11	+	ENST00000078429	52	K	Family-wise	PER1	adj-p=1.15e-05;logp=-4.94;OR=12.77(95%C.I.=5.92-Inf)	2507.para.1	GNA11;GNAQ;GNA14;GNA15;GNAI1;GNAI3;GNAI2;GNAO1;GNAT2;GNAT1;GNAT3;GNAZ
	19	3110165	A	GNA11	+	ENST00000078429	52	K	Family-wise	PER1	adj-p=1.15e-05;logp=-4.94;OR=12.77(95%C.I.=5.92-Inf)	2507.para.1	GNA11;GNAQ;GNA14;GNA15;GNAI1;GNAI3;GNAI2;GNAO1;GNAT2;GNAT1;GNAT3;GNAZ
	19	3110166	G	GNA11	+	ENST00000078429	52	K	Family-wise	PER1	adj-p=1.15e-05;logp=-4.94;OR=12.77(95%C.I.=5.92-Inf)	2507.para.1	GNA11;GNAQ;GNA14;GNA15;GNAI1;GNAI3;GNAI2;GNAO1;GNAT2;GNAT1;GNAT3;GNAZ
	19	3110167	A	GNA11	+	ENST00000078429	53	S	Family-wise	PER1	adj-p=1.15e-05;logp=-4.94;OR=12.77(95%C.I.=5.92-Inf)	2507.para.1	GNA11;GNAQ;GNA14;GNA15;GNAI1;GNAI3;GNAI2;GNAO1;GNAT2;GNAT1;GNAT3;GNAZ
	19	3110168	G	GNA11	+	ENST00000078429	53	S	Family-wise	PER1	adj-p=1.15e-05;logp=-4.94;OR=12.77(95%C.I.=5.92-Inf)	2507.para.1	GNA11;GNAQ;GNA14;GNA15;GNAI1;GNAI3;GNAI2;GNAO1;GNAT2;GNAT1;GNAT3;GNAZ
	19	3110169	C	GNA11	+	ENST00000078429	53	S	Family-wise	PER1	adj-p=1.15e-05;logp=-4.94;OR=12.77(95%C.I.=5.92-Inf)	2507.para.1	GNA11;GNAQ;GNA14;GNA15;GNAI1;GNAI3;GNAI2;GNAO1;GNAT2;GNAT1;GNAT3;GNAZ
	19	3110170	A	GNA11	+	ENST00000078429	54	T	Family-wise	PER1	adj-p=1.15e-05;logp=-4.94;OR=12.77(95%C.I.=5.92-Inf)	2507.para.1	GNA11;GNAQ;GNA14;GNA15;GNAI1;GNAI3;GNAI2;GNAO1;GNAT2;GNAT1;GNAT3;GNAZ
	19	3110171	C	GNA11	+	ENST00000078429	54	T	Family-wise	PER1	adj-p=1.15e-05;logp=-4.94;OR=12.77(95%C.I.=5.92-Inf)	2507.para.1	GNA11;GNAQ;GNA14;GNA15;GNAI1;GNAI3;GNAI2;GNAO1;GNAT2;GNAT1;GNAT3;GNAZ
	19	3110172	G	GNA11	+	ENST00000078429	54	T	Family-wise	PER1	adj-p=1.15e-05;logp=-4.94;OR=12.77(95%C.I.=5.92-Inf)	2507.para.1	GNA11;GNAQ;GNA14;GNA15;GNAI1;GNAI3;GNAI2;GNAO1;GNAT2;GNAT1;GNAT3;GNAZ
	19	3110173	T	GNA11	+	ENST00000078429	55	F	Family-wise	PER1	adj-p=1.15e-05;logp=-4.94;OR=12.77(95%C.I.=5.92-Inf)	2507.para.1	GNA11;GNAQ;GNA14;GNA15;GNAI1;GNAI3;GNAI2;GNAO1;GNAT2;GNAT1;GNAT3;GNAZ
	19	3110174	T	GNA11	+	ENST00000078429	55	F	Family-wise	PER1	adj-p=1.15e-05;logp=-4.94;OR=12.77(95%C.I.=5.92-Inf)	2507.para.1	GNA11;GNAQ;GNA14;GNA15;GNAI1;GNAI3;GNAI2;GNAO1;GNAT2;GNAT1;GNAT3;GNAZ
	19	3110175	C	GNA11	+	ENST00000078429	55	F	Family-wise	PER1	adj-p=1.15e-05;logp=-4.94;OR=12.77(95%C.I.=5.92-Inf)	2507.para.1	GNA11;GNAQ;GNA14;GNA15;GNAI1;GNAI3;GNAI2;GNAO1;GNAT2;GNAT1;GNAT3;GNAZ
	19	3110176	A	GNA11	+	ENST00000078429	56	I	Family-wise	PER1	adj-p=1.15e-05;logp=-4.94;OR=12.77(95%C.I.=5.92-Inf)	2507.para.1	GNA11;GNAQ;GNA14;GNA15;GNAI1;GNAI3;GNAI2;GNAO1;GNAT2;GNAT1;GNAT3;GNAZ
	19	3110177	T	GNA11	+	ENST00000078429	56	I	Family-wise	PER1	adj-p=1.15e-05;logp=-4.94;OR=12.77(95%C.I.=5.92-Inf)	2507.para.1	GNA11;GNAQ;GNA14;GNA15;GNAI1;GNAI3;GNAI2;GNAO1;GNAT2;GNAT1;GNAT3;GNAZ
	19	3110178	C	GNA11	+	ENST00000078429	56	I	Family-wise	PER1	adj-p=1.15e-05;logp=-4.94;OR=12.77(95%C.I.=5.92-Inf)	2507.para.1	GNA11;GNAQ;GNA14;GNA15;GNAI1;GNAI3;GNAI2;GNAO1;GNAT2;GNAT1;GNAT3;GNAZ
	19	3110179	A	GNA11	+	ENST00000078429	57	K	Family-wise	PER1	adj-p=6.72e-04;logp=-3.17;OR=10.28(95%C.I.=4.42-Inf)	2507.para.1	GNA11;GNAQ;GNA14;GNA15;GNAI1;GNAI3;GNAI2;GNAO1;GNAT2;GNAT1;GNAT3;GNAZ
	19	3110180	A	GNA11	+	ENST00000078429	57	K	Family-wise	PER1	adj-p=6.72e-04;logp=-3.17;OR=10.28(95%C.I.=4.42-Inf)	2507.para.1	GNA11;GNAQ;GNA14;GNA15;GNAI1;GNAI3;GNAI2;GNAO1;GNAT2;GNAT1;GNAT3;GNAZ
	19	3110181	G	GNA11	+	ENST00000078429	57	K	Family-wise	PER1	adj-p=6.72e-04;logp=-3.17;OR=10.28(95%C.I.=4.42-Inf)	2507.para.1	GNA11;GNAQ;GNA14;GNA15;GNAI1;GNAI3;GNAI2;GNAO1;GNAT2;GNAT1;GNAT3;GNAZ
	19	3110182	C	GNA11	+	ENST00000078429	58	Q	Family-wise	PER1	adj-p=6.72e-04;logp=-3.17;OR=10.28(95%C.I.=4.42-Inf)	2507.para.1	GNA11;GNAQ;GNA14;GNA15;GNAI1;GNAI3;GNAI2;GNAO1;GNAT2;GNAT1;GNAT3;GNAZ
	19	3110183	A	GNA11	+	ENST00000078429	58	Q	Family-wise	PER1	adj-p=6.72e-04;logp=-3.17;OR=10.28(95%C.I.=4.42-Inf)	2507.para.1	GNA11;GNAQ;GNA14;GNA15;GNAI1;GNAI3;GNAI2;GNAO1;GNAT2;GNAT1;GNAT3;GNAZ
	19	3110184	G	GNA11	+	ENST00000078429	58	Q	Family-wise	PER1	adj-p=6.72e-04;logp=-3.17;OR=10.28(95%C.I.=4.42-Inf)	2507.para.1	GNA11;GNAQ;GNA14;GNA15;GNAI1;GNAI3;GNAI2;GNAO1;GNAT2;GNAT1;GNAT3;GNAZ
	19	3110185	A	GNA11	+	ENST00000078429	59	M	Family-wise	PER1	adj-p=6.72e-04;logp=-3.17;OR=10.28(95%C.I.=4.42-Inf)	2507.para.1	GNA11;GNAQ;GNA14;GNA15;GNAI1;GNAI3;GNAI2;GNAO1;GNAT2;GNAT1;GNAT3;GNAZ
	19	3110186	T	GNA11	+	ENST00000078429	59	M	Family-wise	PER1	adj-p=6.72e-04;logp=-3.17;OR=10.28(95%C.I.=4.42-Inf)	2507.para.1	GNA11;GNAQ;GNA14;GNA15;GNAI1;GNAI3;GNAI2;GNAO1;GNAT2;GNAT1;GNAT3;GNAZ
	19	3110187	G	GNA11	+	ENST00000078429	59	M	Family-wise	PER1	adj-p=6.72e-04;logp=-3.17;OR=10.28(95%C.I.=4.42-Inf)	2507.para.1	GNA11;GNAQ;GNA14;GNA15;GNAI1;GNAI3;GNAI2;GNAO1;GNAT2;GNAT1;GNAT3;GNAZ
	19	3110188	C	GNA11	+	ENST00000078429	60	R	Family-wise	PER1	adj-p=6.72e-04;logp=-3.17;OR=10.28(95%C.I.=4.42-Inf)	2507.para.1	GNA11;GNAQ;GNA14;GNA15;GNAI1;GNAI3;GNAI2;GNAO1;GNAT2;GNAT1;GNAT3;GNAZ
	19	3110189	G	GNA11	+	ENST00000078429	60	R	Family-wise	PER1	adj-p=6.72e-04;logp=-3.17;OR=10.28(95%C.I.=4.42-Inf)	2507.para.1	GNA11;GNAQ;GNA14;GNA15;GNAI1;GNAI3;GNAI2;GNAO1;GNAT2;GNAT1;GNAT3;GNAZ
	19	3110190	C	GNA11	+	ENST00000078429	60	R	Family-wise	PER1	adj-p=6.72e-04;logp=-3.17;OR=10.28(95%C.I.=4.42-Inf)	2507.para.1	GNA11;GNAQ;GNA14;GNA15;GNAI1;GNAI3;GNAI2;GNAO1;GNAT2;GNAT1;GNAT3;GNAZ
	19	3110191	A	GNA11	+	ENST00000078429	61	I	Family-wise	PER1	adj-p=6.72e-04;logp=-3.17;OR=10.28(95%C.I.=4.42-Inf)	2507.para.1	GNA11;GNAQ;GNA14;GNA15;GNAI1;GNAI3;GNAI2;GNAO1;GNAT2;GNAT1;GNAT3;GNAZ
	19	3110192	T	GNA11	+	ENST00000078429	61	I	Family-wise	PER1	adj-p=6.72e-04;logp=-3.17;OR=10.28(95%C.I.=4.42-Inf)	2507.para.1	GNA11;GNAQ;GNA14;GNA15;GNAI1;GNAI3;GNAI2;GNAO1;GNAT2;GNAT1;GNAT3;GNAZ
	19	3110193	C	GNA11	+	ENST00000078429	61	I	Family-wise	PER1	adj-p=6.72e-04;logp=-3.17;OR=10.28(95%C.I.=4.42-Inf)	2507.para.1	GNA11;GNAQ;GNA14;GNA15;GNAI1;GNAI3;GNAI2;GNAO1;GNAT2;GNAT1;GNAT3;GNAZ
	19	3115066	T	GNA11	+	ENST00000078429	201	F	Family-wise	PER2	adj-p=3.13e-04;logp=-3.50;OR=9.58(95%C.I.=4.36-Inf)	2507.para.1	GNA11;GNAQ;GNA14;GNA15;GNAI1;GNAI3;GNAI2;GNAO1;GNAT2;GNAT1;GNAT3;GNAZ
	19	3115067	T	GNA11	+	ENST00000078429	201	F	Family-wise	PER2	adj-p=3.13e-04;logp=-3.50;OR=9.58(95%C.I.=4.36-Inf)	2507.para.1	GNA11;GNAQ;GNA14;GNA15;GNAI1;GNAI3;GNAI2;GNAO1;GNAT2;GNAT1;GNAT3;GNAZ
	19	3115068	C	GNA11	+	ENST00000078429	201	F	Family-wise	PER2	adj-p=3.13e-04;logp=-3.50;OR=9.58(95%C.I.=4.36-Inf)	2507.para.1	GNA11;GNAQ;GNA14;GNA15;GNAI1;GNAI3;GNAI2;GNAO1;GNAT2;GNAT1;GNAT3;GNAZ
	19	3118920	C	GNA11	+	ENST00000078429	202	R	Family-wise	PER2	adj-p=3.13e-04;logp=-3.50;OR=9.58(95%C.I.=4.36-Inf)	2507.para.1	GNA11;GNAQ;GNA14;GNA15;GNAI1;GNAI3;GNAI2;GNAO1;GNAT2;GNAT1;GNAT3;GNAZ
	19	3118921	G	GNA11	+	ENST00000078429	202	R	Family-wise	PER2	adj-p=3.13e-04;logp=-3.50;OR=9.58(95%C.I.=4.36-Inf)	2507.para.1	GNA11;GNAQ;GNA14;GNA15;GNAI1;GNAI3;GNAI2;GNAO1;GNAT2;GNAT1;GNAT3;GNAZ
	19	3118922	G	GNA11	+	ENST00000078429	202	R	Family-wise	PER2	adj-p=3.13e-04;logp=-3.50;OR=9.58(95%C.I.=4.36-Inf)	2507.para.1	GNA11;GNAQ;GNA14;GNA15;GNAI1;GNAI3;GNAI2;GNAO1;GNAT2;GNAT1;GNAT3;GNAZ
	19	3118923	A	GNA11	+	ENST00000078429	203	M	Family-wise	PER2	adj-p=3.13e-04;logp=-3.50;OR=9.58(95%C.I.=4.36-Inf)	2507.para.1	GNA11;GNAQ;GNA14;GNA15;GNAI1;GNAI3;GNAI2;GNAO1;GNAT2;GNAT1;GNAT3;GNAZ
	19	3118924	T	GNA11	+	ENST00000078429	203	M	Family-wise	PER2	adj-p=3.13e-04;logp=-3.50;OR=9.58(95%C.I.=4.36-Inf)	2507.para.1	GNA11;GNAQ;GNA14;GNA15;GNAI1;GNAI3;GNAI2;GNAO1;GNAT2;GNAT1;GNAT3;GNAZ
	19	3118925	G	GNA11	+	ENST00000078429	203	M	Family-wise	PER2	adj-p=3.13e-04;logp=-3.50;OR=9.58(95%C.I.=4.36-Inf)	2507.para.1	GNA11;GNAQ;GNA14;GNA15;GNAI1;GNAI3;GNAI2;GNAO1;GNAT2;GNAT1;GNAT3;GNAZ
	19	3118926	G	GNA11	+	ENST00000078429	204	V	Family-wise	PER2	adj-p=3.13e-04;logp=-3.50;OR=9.58(95%C.I.=4.36-Inf)	2507.para.1	GNA11;GNAQ;GNA14;GNA15;GNAI1;GNAI3;GNAI2;GNAO1;GNAT2;GNAT1;GNAT3;GNAZ
	19	3118927	T	GNA11	+	ENST00000078429	204	V	Family-wise	PER2	adj-p=3.13e-04;logp=-3.50;OR=9.58(95%C.I.=4.36-Inf)	2507.para.1	GNA11;GNAQ;GNA14;GNA15;GNAI1;GNAI3;GNAI2;GNAO1;GNAT2;GNAT1;GNAT3;GNAZ
	19	3118928	G	GNA11	+	ENST00000078429	204	V	Family-wise	PER2	adj-p=3.13e-04;logp=-3.50;OR=9.58(95%C.I.=4.36-Inf)	2507.para.1	GNA11;GNAQ;GNA14;GNA15;GNAI1;GNAI3;GNAI2;GNAO1;GNAT2;GNAT1;GNAT3;GNAZ
	19	3118929	G	GNA11	+	ENST00000078429	205	D	Family-wise	PER2	adj-p=3.13e-04;logp=-3.50;OR=9.58(95%C.I.=4.36-Inf)	2507.para.1	GNA11;GNAQ;GNA14;GNA15;GNAI1;GNAI3;GNAI2;GNAO1;GNAT2;GNAT1;GNAT3;GNAZ
	19	3118930	A	GNA11	+	ENST00000078429	205	D	Family-wise	PER2	adj-p=3.13e-04;logp=-3.50;OR=9.58(95%C.I.=4.36-Inf)	2507.para.1	GNA11;GNAQ;GNA14;GNA15;GNAI1;GNAI3;GNAI2;GNAO1;GNAT2;GNAT1;GNAT3;GNAZ
	19	3118931	T	GNA11	+	ENST00000078429	205	D	Family-wise	PER2	adj-p=3.13e-04;logp=-3.50;OR=9.58(95%C.I.=4.36-Inf)	2507.para.1	GNA11;GNAQ;GNA14;GNA15;GNAI1;GNAI3;GNAI2;GNAO1;GNAT2;GNAT1;GNAT3;GNAZ
	19	3118932	G	GNA11	+	ENST00000078429	206	V	Family-wise	PER2	adj-p=3.84e-05;logp=-4.42;OR=10.85(95%C.I.=5.10-Inf)	2507.para.1	GNA11;GNAQ;GNA14;GNA15;GNAI1;GNAI3;GNAI2;GNAO1;GNAT2;GNAT1;GNAT3;GNAZ
	19	3118933	T	GNA11	+	ENST00000078429	206	V	Family-wise	PER2	adj-p=3.84e-05;logp=-4.42;OR=10.85(95%C.I.=5.10-Inf)	2507.para.1	GNA11;GNAQ;GNA14;GNA15;GNAI1;GNAI3;GNAI2;GNAO1;GNAT2;GNAT1;GNAT3;GNAZ
	19	3118934	G	GNA11	+	ENST00000078429	206	V	Family-wise	PER2	adj-p=3.84e-05;logp=-4.42;OR=10.85(95%C.I.=5.10-Inf)	2507.para.1	GNA11;GNAQ;GNA14;GNA15;GNAI1;GNAI3;GNAI2;GNAO1;GNAT2;GNAT1;GNAT3;GNAZ
	19	3118935	G	GNA11	+	ENST00000078429	207	G	Family-wise	PER2	adj-p=3.84e-05;logp=-4.42;OR=10.85(95%C.I.=5.10-Inf)	2507.para.1	GNA11;GNAQ;GNA14;GNA15;GNAI1;GNAI3;GNAI2;GNAO1;GNAT2;GNAT1;GNAT3;GNAZ
	19	3118936	G	GNA11	+	ENST00000078429	207	G	Family-wise	PER2	adj-p=3.84e-05;logp=-4.42;OR=10.85(95%C.I.=5.10-Inf)	2507.para.1	GNA11;GNAQ;GNA14;GNA15;GNAI1;GNAI3;GNAI2;GNAO1;GNAT2;GNAT1;GNAT3;GNAZ
	19	3118937	G	GNA11	+	ENST00000078429	207	G	Family-wise	PER2	adj-p=3.84e-05;logp=-4.42;OR=10.85(95%C.I.=5.10-Inf)	2507.para.1	GNA11;GNAQ;GNA14;GNA15;GNAI1;GNAI3;GNAI2;GNAO1;GNAT2;GNAT1;GNAT3;GNAZ
	19	3118938	G	GNA11	+	ENST00000078429	208	G	Family-wise	PER2	adj-p=3.84e-05;logp=-4.42;OR=10.85(95%C.I.=5.10-Inf)	2507.para.1	GNA11;GNAQ;GNA14;GNA15;GNAI1;GNAI3;GNAI2;GNAO1;GNAT2;GNAT1;GNAT3;GNAZ
	19	3118939	G	GNA11	+	ENST00000078429	208	G	Family-wise	PER2	adj-p=3.84e-05;logp=-4.42;OR=10.85(95%C.I.=5.10-Inf)	2507.para.1	GNA11;GNAQ;GNA14;GNA15;GNAI1;GNAI3;GNAI2;GNAO1;GNAT2;GNAT1;GNAT3;GNAZ
	19	3118940	C	GNA11	+	ENST00000078429	208	G	Family-wise	PER2	adj-p=3.84e-05;logp=-4.42;OR=10.85(95%C.I.=5.10-Inf)	2507.para.1	GNA11;GNAQ;GNA14;GNA15;GNAI1;GNAI3;GNAI2;GNAO1;GNAT2;GNAT1;GNAT3;GNAZ
	19	3118941	C	GNA11	+	ENST00000078429	209	Q	Family-wise	PER2	adj-p=3.84e-05;logp=-4.42;OR=10.85(95%C.I.=5.10-Inf)	2507.para.1	GNA11;GNAQ;GNA14;GNA15;GNAI1;GNAI3;GNAI2;GNAO1;GNAT2;GNAT1;GNAT3;GNAZ
	19	3118942	A	GNA11	+	ENST00000078429	209	Q	Family-wise	PER2	adj-p=3.84e-05;logp=-4.42;OR=10.85(95%C.I.=5.10-Inf)	2507.para.1	GNA11;GNAQ;GNA14;GNA15;GNAI1;GNAI3;GNAI2;GNAO1;GNAT2;GNAT1;GNAT3;GNAZ
	19	3118943	G	GNA11	+	ENST00000078429	209	Q	Family-wise	PER2	adj-p=3.84e-05;logp=-4.42;OR=10.85(95%C.I.=5.10-Inf)	2507.para.1	GNA11;GNAQ;GNA14;GNA15;GNAI1;GNAI3;GNAI2;GNAO1;GNAT2;GNAT1;GNAT3;GNAZ
	19	3118944	C	GNA11	+	ENST00000078429	210	R	Family-wise	PER2	adj-p=3.84e-05;logp=-4.42;OR=10.85(95%C.I.=5.10-Inf)	2507.para.1	GNA11;GNAQ;GNA14;GNA15;GNAI1;GNAI3;GNAI2;GNAO1;GNAT2;GNAT1;GNAT3;GNAZ
	19	3118945	G	GNA11	+	ENST00000078429	210	R	Family-wise	PER2	adj-p=3.84e-05;logp=-4.42;OR=10.85(95%C.I.=5.10-Inf)	2507.para.1	GNA11;GNAQ;GNA14;GNA15;GNAI1;GNAI3;GNAI2;GNAO1;GNAT2;GNAT1;GNAT3;GNAZ
	19	3118946	G	GNA11	+	ENST00000078429	210	R	Family-wise	PER2	adj-p=3.84e-05;logp=-4.42;OR=10.85(95%C.I.=5.10-Inf)	2507.para.1	GNA11;GNAQ;GNA14;GNA15;GNAI1;GNAI3;GNAI2;GNAO1;GNAT2;GNAT1;GNAT3;GNAZ
	19	3118947	T	GNA11	+	ENST00000078429	211	S	Family-wise	PER2	adj-p=3.84e-05;logp=-4.42;OR=10.85(95%C.I.=5.10-Inf)	2507.para.1	GNA11;GNAQ;GNA14;GNA15;GNAI1;GNAI3;GNAI2;GNAO1;GNAT2;GNAT1;GNAT3;GNAZ
	19	3118948	C	GNA11	+	ENST00000078429	211	S	Family-wise	PER2	adj-p=3.84e-05;logp=-4.42;OR=10.85(95%C.I.=5.10-Inf)	2507.para.1	GNA11;GNAQ;GNA14;GNA15;GNAI1;GNAI3;GNAI2;GNAO1;GNAT2;GNAT1;GNAT3;GNAZ
	19	3118949	G	GNA11	+	ENST00000078429	211	S	Family-wise	PER2	adj-p=3.84e-05;logp=-4.42;OR=10.85(95%C.I.=5.10-Inf)	2507.para.1	GNA11;GNAQ;GNA14;GNA15;GNAI1;GNAI3;GNAI2;GNAO1;GNAT2;GNAT1;GNAT3;GNAZ
	19	3118950	G	GNA11	+	ENST00000078429	212	E	Family-wise	PER2	adj-p=3.84e-05;logp=-4.42;OR=10.85(95%C.I.=5.10-Inf)	2507.para.1	GNA11;GNAQ;GNA14;GNA15;GNAI1;GNAI3;GNAI2;GNAO1;GNAT2;GNAT1;GNAT3;GNAZ
	19	3118951	A	GNA11	+	ENST00000078429	212	E	Family-wise	PER2	adj-p=3.84e-05;logp=-4.42;OR=10.85(95%C.I.=5.10-Inf)	2507.para.1	GNA11;GNAQ;GNA14;GNA15;GNAI1;GNAI3;GNAI2;GNAO1;GNAT2;GNAT1;GNAT3;GNAZ
	19	3118952	G	GNA11	+	ENST00000078429	212	E	Family-wise	PER2	adj-p=3.84e-05;logp=-4.42;OR=10.85(95%C.I.=5.10-Inf)	2507.para.1	GNA11;GNAQ;GNA14;GNA15;GNAI1;GNAI3;GNAI2;GNAO1;GNAT2;GNAT1;GNAT3;GNAZ
	19	3118953	C	GNA11	+	ENST00000078429	213	R	Family-wise	PER2	adj-p=3.84e-05;logp=-4.42;OR=10.85(95%C.I.=5.10-Inf)	2507.para.1	GNA11;GNAQ;GNA14;GNA15;GNAI1;GNAI3;GNAI2;GNAO1;GNAT2;GNAT1;GNAT3;GNAZ
	19	3118954	G	GNA11	+	ENST00000078429	213	R	Family-wise	PER2	adj-p=3.84e-05;logp=-4.42;OR=10.85(95%C.I.=5.10-Inf)	2507.para.1	GNA11;GNAQ;GNA14;GNA15;GNAI1;GNAI3;GNAI2;GNAO1;GNAT2;GNAT1;GNAT3;GNAZ
	19	3118955	G	GNA11	+	ENST00000078429	213	R	Family-wise	PER2	adj-p=3.84e-05;logp=-4.42;OR=10.85(95%C.I.=5.10-Inf)	2507.para.1	GNA11;GNAQ;GNA14;GNA15;GNAI1;GNAI3;GNAI2;GNAO1;GNAT2;GNAT1;GNAT3;GNAZ
	19	3118956	A	GNA11	+	ENST00000078429	214	R	Family-wise	PER2	adj-p=3.84e-05;logp=-4.42;OR=10.85(95%C.I.=5.10-Inf)	2507.para.1	GNA11;GNAQ;GNA14;GNA15;GNAI1;GNAI3;GNAI2;GNAO1;GNAT2;GNAT1;GNAT3;GNAZ
	19	3118957	G	GNA11	+	ENST00000078429	214	R	Family-wise	PER2	adj-p=3.84e-05;logp=-4.42;OR=10.85(95%C.I.=5.10-Inf)	2507.para.1	GNA11;GNAQ;GNA14;GNA15;GNAI1;GNAI3;GNAI2;GNAO1;GNAT2;GNAT1;GNAT3;GNAZ
	19	3118958	G	GNA11	+	ENST00000078429	214	R	Family-wise	PER2	adj-p=3.84e-05;logp=-4.42;OR=10.85(95%C.I.=5.10-Inf)	2507.para.1	GNA11;GNAQ;GNA14;GNA15;GNAI1;GNAI3;GNAI2;GNAO1;GNAT2;GNAT1;GNAT3;GNAZ
	12	6443269	T	TNFRSF1A	-	ENST00000162749	61	K	Family-wise	PER1	adj-p=3.05e-02;logp=-1.52;OR=20.47(95%C.I.=4.10-Inf)	605.para.1	TNFRSF25;TNFRSF1A
	12	6443268	T	TNFRSF1A	-	ENST00000162749	61	K	Family-wise	PER1	adj-p=3.05e-02;logp=-1.52;OR=20.47(95%C.I.=4.10-Inf)	605.para.1	TNFRSF25;TNFRSF1A
	12	6443267	C	TNFRSF1A	-	ENST00000162749	61	K	Family-wise	PER1	adj-p=3.05e-02;logp=-1.52;OR=20.47(95%C.I.=4.10-Inf)	605.para.1	TNFRSF25;TNFRSF1A
	12	6443266	A	TNFRSF1A	-	ENST00000162749	62	C	Family-wise	PER1	adj-p=3.05e-02;logp=-1.52;OR=20.47(95%C.I.=4.10-Inf)	605.para.1	TNFRSF25;TNFRSF1A
	12	6443265	C	TNFRSF1A	-	ENST00000162749	62	C	Family-wise	PER1	adj-p=3.05e-02;logp=-1.52;OR=20.47(95%C.I.=4.10-Inf)	605.para.1	TNFRSF25;TNFRSF1A
	12	6443264	G	TNFRSF1A	-	ENST00000162749	62	C	Family-wise	PER1	adj-p=3.05e-02;logp=-1.52;OR=20.47(95%C.I.=4.10-Inf)	605.para.1	TNFRSF25;TNFRSF1A
	12	6443263	G	TNFRSF1A	-	ENST00000162749	63	H	Family-wise	PER1	adj-p=3.05e-02;logp=-1.52;OR=20.47(95%C.I.=4.10-Inf)	605.para.1	TNFRSF25;TNFRSF1A
	12	6443262	T	TNFRSF1A	-	ENST00000162749	63	H	Family-wise	PER1	adj-p=3.05e-02;logp=-1.52;OR=20.47(95%C.I.=4.10-Inf)	605.para.1	TNFRSF25;TNFRSF1A
	12	6443261	G	TNFRSF1A	-	ENST00000162749	63	H	Family-wise	PER1	adj-p=3.05e-02;logp=-1.52;OR=20.47(95%C.I.=4.10-Inf)	605.para.1	TNFRSF25;TNFRSF1A
	12	6443260	T	TNFRSF1A	-	ENST00000162749	64	K	Family-wise	PER1	adj-p=3.05e-02;logp=-1.52;OR=20.47(95%C.I.=4.10-Inf)	605.para.1	TNFRSF25;TNFRSF1A
	12	6443259	T	TNFRSF1A	-	ENST00000162749	64	K	Family-wise	PER1	adj-p=3.05e-02;logp=-1.52;OR=20.47(95%C.I.=4.10-Inf)	605.para.1	TNFRSF25;TNFRSF1A
	12	6443258	T	TNFRSF1A	-	ENST00000162749	64	K	Family-wise	PER1	adj-p=3.05e-02;logp=-1.52;OR=20.47(95%C.I.=4.10-Inf)	605.para.1	TNFRSF25;TNFRSF1A
	12	6443032	C	TNFRSF1A	-	ENST00000162749	65	G	Family-wise	PER1	adj-p=3.05e-02;logp=-1.52;OR=20.47(95%C.I.=4.10-Inf)	605.para.1	TNFRSF25;TNFRSF1A
	12	6443031	C	TNFRSF1A	-	ENST00000162749	65	G	Family-wise	PER1	adj-p=3.05e-02;logp=-1.52;OR=20.47(95%C.I.=4.10-Inf)	605.para.1	TNFRSF25;TNFRSF1A
	12	6443030	T	TNFRSF1A	-	ENST00000162749	65	G	Family-wise	PER1	adj-p=3.05e-02;logp=-1.52;OR=20.47(95%C.I.=4.10-Inf)	605.para.1	TNFRSF25;TNFRSF1A
	12	6443029	T	TNFRSF1A	-	ENST00000162749	66	T	Family-wise	PER1	adj-p=3.05e-02;logp=-1.52;OR=20.47(95%C.I.=4.10-Inf)	605.para.1	TNFRSF25;TNFRSF1A
	12	6443028	G	TNFRSF1A	-	ENST00000162749	66	T	Family-wise	PER1	adj-p=3.05e-02;logp=-1.52;OR=20.47(95%C.I.=4.10-Inf)	605.para.1	TNFRSF25;TNFRSF1A
	12	6443027	G	TNFRSF1A	-	ENST00000162749	66	T	Family-wise	PER1	adj-p=3.05e-02;logp=-1.52;OR=20.47(95%C.I.=4.10-Inf)	605.para.1	TNFRSF25;TNFRSF1A
	12	6443026	A	TNFRSF1A	-	ENST00000162749	67	Y	Family-wise	PER1	adj-p=3.05e-02;logp=-1.52;OR=20.47(95%C.I.=4.10-Inf)	605.para.1	TNFRSF25;TNFRSF1A
	12	6443025	T	TNFRSF1A	-	ENST00000162749	67	Y	Family-wise	PER1	adj-p=3.05e-02;logp=-1.52;OR=20.47(95%C.I.=4.10-Inf)	605.para.1	TNFRSF25;TNFRSF1A
	12	6443024	G	TNFRSF1A	-	ENST00000162749	67	Y	Family-wise	PER1	adj-p=3.05e-02;logp=-1.52;OR=20.47(95%C.I.=4.10-Inf)	605.para.1	TNFRSF25;TNFRSF1A
	12	6443023	A	TNFRSF1A	-	ENST00000162749	68	L	Family-wise	PER1	adj-p=3.05e-02;logp=-1.52;OR=20.47(95%C.I.=4.10-Inf)	605.para.1	TNFRSF25;TNFRSF1A
	12	6443022	A	TNFRSF1A	-	ENST00000162749	68	L	Family-wise	PER1	adj-p=3.05e-02;logp=-1.52;OR=20.47(95%C.I.=4.10-Inf)	605.para.1	TNFRSF25;TNFRSF1A
	12	6443021	C	TNFRSF1A	-	ENST00000162749	68	L	Family-wise	PER1	adj-p=3.05e-02;logp=-1.52;OR=20.47(95%C.I.=4.10-Inf)	605.para.1	TNFRSF25;TNFRSF1A
	12	6443020	A	TNFRSF1A	-	ENST00000162749	69	Y	Family-wise	PER1	adj-p=3.05e-02;logp=-1.52;OR=20.47(95%C.I.=4.10-Inf)	605.para.1	TNFRSF25;TNFRSF1A
	12	6443019	T	TNFRSF1A	-	ENST00000162749	69	Y	Family-wise	PER1	adj-p=3.05e-02;logp=-1.52;OR=20.47(95%C.I.=4.10-Inf)	605.para.1	TNFRSF25;TNFRSF1A
	12	6443018	G	TNFRSF1A	-	ENST00000162749	69	Y	Family-wise	PER1	adj-p=3.05e-02;logp=-1.52;OR=20.47(95%C.I.=4.10-Inf)	605.para.1	TNFRSF25;TNFRSF1A
	11	64695319	G	PPP2R5B	+	ENST00000164133	148	E	Family-wise	PER1	adj-p=6.45e-05;logp=-4.19;OR=129.12(95%C.I.=26.86-Inf)	2075.para.1	PPP2R5E;PPP2R5A;PPP2R5B;PPP2R5C;PPP2R5D
	11	64695320	A	PPP2R5B	+	ENST00000164133	148	E	Family-wise	PER1	adj-p=6.45e-05;logp=-4.19;OR=129.12(95%C.I.=26.86-Inf)	2075.para.1	PPP2R5E;PPP2R5A;PPP2R5B;PPP2R5C;PPP2R5D
	11	64695321	A	PPP2R5B	+	ENST00000164133	148	E	Family-wise	PER1	adj-p=6.45e-05;logp=-4.19;OR=129.12(95%C.I.=26.86-Inf)	2075.para.1	PPP2R5E;PPP2R5A;PPP2R5B;PPP2R5C;PPP2R5D
	11	64695322	T	PPP2R5B	+	ENST00000164133	149	F	Family-wise	PER1	adj-p=6.45e-05;logp=-4.19;OR=129.12(95%C.I.=26.86-Inf)	2075.para.1	PPP2R5E;PPP2R5A;PPP2R5B;PPP2R5C;PPP2R5D
	11	64695323	T	PPP2R5B	+	ENST00000164133	149	F	Family-wise	PER1	adj-p=6.45e-05;logp=-4.19;OR=129.12(95%C.I.=26.86-Inf)	2075.para.1	PPP2R5E;PPP2R5A;PPP2R5B;PPP2R5C;PPP2R5D
	11	64695324	T	PPP2R5B	+	ENST00000164133	149	F	Family-wise	PER1	adj-p=6.45e-05;logp=-4.19;OR=129.12(95%C.I.=26.86-Inf)	2075.para.1	PPP2R5E;PPP2R5A;PPP2R5B;PPP2R5C;PPP2R5D
	11	64695325	G	PPP2R5B	+	ENST00000164133	150	D	Family-wise	PER1	adj-p=6.45e-05;logp=-4.19;OR=129.12(95%C.I.=26.86-Inf)	2075.para.1	PPP2R5E;PPP2R5A;PPP2R5B;PPP2R5C;PPP2R5D
	11	64695326	A	PPP2R5B	+	ENST00000164133	150	D	Family-wise	PER1	adj-p=6.45e-05;logp=-4.19;OR=129.12(95%C.I.=26.86-Inf)	2075.para.1	PPP2R5E;PPP2R5A;PPP2R5B;PPP2R5C;PPP2R5D
	11	64695327	C	PPP2R5B	+	ENST00000164133	150	D	Family-wise	PER1	adj-p=6.45e-05;logp=-4.19;OR=129.12(95%C.I.=26.86-Inf)	2075.para.1	PPP2R5E;PPP2R5A;PPP2R5B;PPP2R5C;PPP2R5D
	11	64695328	C	PPP2R5B	+	ENST00000164133	151	P	Family-wise	PER1	adj-p=6.45e-05;logp=-4.19;OR=129.12(95%C.I.=26.86-Inf)	2075.para.1	PPP2R5E;PPP2R5A;PPP2R5B;PPP2R5C;PPP2R5D
	11	64695329	C	PPP2R5B	+	ENST00000164133	151	P	Family-wise	PER1	adj-p=6.45e-05;logp=-4.19;OR=129.12(95%C.I.=26.86-Inf)	2075.para.1	PPP2R5E;PPP2R5A;PPP2R5B;PPP2R5C;PPP2R5D
	11	64695330	T	PPP2R5B	+	ENST00000164133	151	P	Family-wise	PER1	adj-p=6.45e-05;logp=-4.19;OR=129.12(95%C.I.=26.86-Inf)	2075.para.1	PPP2R5E;PPP2R5A;PPP2R5B;PPP2R5C;PPP2R5D
	11	64695331	G	PPP2R5B	+	ENST00000164133	152	E	Family-wise	PER1	adj-p=6.45e-05;logp=-4.19;OR=129.12(95%C.I.=26.86-Inf)	2075.para.1	PPP2R5E;PPP2R5A;PPP2R5B;PPP2R5C;PPP2R5D
	11	64695332	A	PPP2R5B	+	ENST00000164133	152	E	Family-wise	PER1	adj-p=6.45e-05;logp=-4.19;OR=129.12(95%C.I.=26.86-Inf)	2075.para.1	PPP2R5E;PPP2R5A;PPP2R5B;PPP2R5C;PPP2R5D
	11	64695333	A	PPP2R5B	+	ENST00000164133	152	E	Family-wise	PER1	adj-p=6.45e-05;logp=-4.19;OR=129.12(95%C.I.=26.86-Inf)	2075.para.1	PPP2R5E;PPP2R5A;PPP2R5B;PPP2R5C;PPP2R5D
	11	64695334	G	PPP2R5B	+	ENST00000164133	153	E	Family-wise	PER1	adj-p=6.45e-05;logp=-4.19;OR=129.12(95%C.I.=26.86-Inf)	2075.para.1	PPP2R5E;PPP2R5A;PPP2R5B;PPP2R5C;PPP2R5D
	11	64695335	A	PPP2R5B	+	ENST00000164133	153	E	Family-wise	PER1	adj-p=6.45e-05;logp=-4.19;OR=129.12(95%C.I.=26.86-Inf)	2075.para.1	PPP2R5E;PPP2R5A;PPP2R5B;PPP2R5C;PPP2R5D
	11	64695336	G	PPP2R5B	+	ENST00000164133	153	E	Family-wise	PER1	adj-p=6.45e-05;logp=-4.19;OR=129.12(95%C.I.=26.86-Inf)	2075.para.1	PPP2R5E;PPP2R5A;PPP2R5B;PPP2R5C;PPP2R5D
	11	64695337	G	PPP2R5B	+	ENST00000164133	154	D	Family-wise	PER1	adj-p=6.45e-05;logp=-4.19;OR=129.12(95%C.I.=26.86-Inf)	2075.para.1	PPP2R5E;PPP2R5A;PPP2R5B;PPP2R5C;PPP2R5D
	11	64695338	A	PPP2R5B	+	ENST00000164133	154	D	Family-wise	PER1	adj-p=6.45e-05;logp=-4.19;OR=129.12(95%C.I.=26.86-Inf)	2075.para.1	PPP2R5E;PPP2R5A;PPP2R5B;PPP2R5C;PPP2R5D
	11	64695339	T	PPP2R5B	+	ENST00000164133	154	D	Family-wise	PER1	adj-p=6.45e-05;logp=-4.19;OR=129.12(95%C.I.=26.86-Inf)	2075.para.1	PPP2R5E;PPP2R5A;PPP2R5B;PPP2R5C;PPP2R5D
	11	64695340	G	PPP2R5B	+	ENST00000164133	155	E	Family-wise	PER1	adj-p=6.45e-05;logp=-4.19;OR=129.12(95%C.I.=26.86-Inf)	2075.para.1	PPP2R5E;PPP2R5A;PPP2R5B;PPP2R5C;PPP2R5D
	11	64695341	A	PPP2R5B	+	ENST00000164133	155	E	Family-wise	PER1	adj-p=6.45e-05;logp=-4.19;OR=129.12(95%C.I.=26.86-Inf)	2075.para.1	PPP2R5E;PPP2R5A;PPP2R5B;PPP2R5C;PPP2R5D
	11	64695342	G	PPP2R5B	+	ENST00000164133	155	E	Family-wise	PER1	adj-p=6.45e-05;logp=-4.19;OR=129.12(95%C.I.=26.86-Inf)	2075.para.1	PPP2R5E;PPP2R5A;PPP2R5B;PPP2R5C;PPP2R5D
	11	64695343	C	PPP2R5B	+	ENST00000164133	156	P	Family-wise	PER1	adj-p=6.45e-05;logp=-4.19;OR=129.12(95%C.I.=26.86-Inf)	2075.para.1	PPP2R5E;PPP2R5A;PPP2R5B;PPP2R5C;PPP2R5D
	11	64695344	C	PPP2R5B	+	ENST00000164133	156	P	Family-wise	PER1	adj-p=6.45e-05;logp=-4.19;OR=129.12(95%C.I.=26.86-Inf)	2075.para.1	PPP2R5E;PPP2R5A;PPP2R5B;PPP2R5C;PPP2R5D
	11	64695345	C	PPP2R5B	+	ENST00000164133	156	P	Family-wise	PER1	adj-p=6.45e-05;logp=-4.19;OR=129.12(95%C.I.=26.86-Inf)	2075.para.1	PPP2R5E;PPP2R5A;PPP2R5B;PPP2R5C;PPP2R5D
	11	64695346	A	PPP2R5B	+	ENST00000164133	157	N	Family-wise	PER1	adj-p=3.03e-04;logp=-3.52;OR=78.88(95%C.I.=17.60-Inf)	2075.para.1	PPP2R5E;PPP2R5A;PPP2R5B;PPP2R5C;PPP2R5D
	11	64695347	A	PPP2R5B	+	ENST00000164133	157	N	Family-wise	PER1	adj-p=3.03e-04;logp=-3.52;OR=78.88(95%C.I.=17.60-Inf)	2075.para.1	PPP2R5E;PPP2R5A;PPP2R5B;PPP2R5C;PPP2R5D
	11	64695348	T	PPP2R5B	+	ENST00000164133	157	N	Family-wise	PER1	adj-p=3.03e-04;logp=-3.52;OR=78.88(95%C.I.=17.60-Inf)	2075.para.1	PPP2R5E;PPP2R5A;PPP2R5B;PPP2R5C;PPP2R5D
	11	64695349	C	PPP2R5B	+	ENST00000164133	158	L	Family-wise	PER1	adj-p=3.03e-04;logp=-3.52;OR=78.88(95%C.I.=17.60-Inf)	2075.para.1	PPP2R5E;PPP2R5A;PPP2R5B;PPP2R5C;PPP2R5D
	11	64695350	T	PPP2R5B	+	ENST00000164133	158	L	Family-wise	PER1	adj-p=3.03e-04;logp=-3.52;OR=78.88(95%C.I.=17.60-Inf)	2075.para.1	PPP2R5E;PPP2R5A;PPP2R5B;PPP2R5C;PPP2R5D
	11	64695351	T	PPP2R5B	+	ENST00000164133	158	L	Family-wise	PER1	adj-p=3.03e-04;logp=-3.52;OR=78.88(95%C.I.=17.60-Inf)	2075.para.1	PPP2R5E;PPP2R5A;PPP2R5B;PPP2R5C;PPP2R5D
	11	64695352	G	PPP2R5B	+	ENST00000164133	159	E	Family-wise	PER1	adj-p=3.03e-04;logp=-3.52;OR=78.88(95%C.I.=17.60-Inf)	2075.para.1	PPP2R5E;PPP2R5A;PPP2R5B;PPP2R5C;PPP2R5D
	11	64695353	A	PPP2R5B	+	ENST00000164133	159	E	Family-wise	PER1	adj-p=3.03e-04;logp=-3.52;OR=78.88(95%C.I.=17.60-Inf)	2075.para.1	PPP2R5E;PPP2R5A;PPP2R5B;PPP2R5C;PPP2R5D
	11	64695354	G	PPP2R5B	+	ENST00000164133	159	E	Family-wise	PER1	adj-p=3.03e-04;logp=-3.52;OR=78.88(95%C.I.=17.60-Inf)	2075.para.1	PPP2R5E;PPP2R5A;PPP2R5B;PPP2R5C;PPP2R5D
	11	64695355	C	PPP2R5B	+	ENST00000164133	160	P	Family-wise	PER1	adj-p=3.03e-04;logp=-3.52;OR=78.88(95%C.I.=17.60-Inf)	2075.para.1	PPP2R5E;PPP2R5A;PPP2R5B;PPP2R5C;PPP2R5D
	11	64695356	C	PPP2R5B	+	ENST00000164133	160	P	Family-wise	PER1	adj-p=3.03e-04;logp=-3.52;OR=78.88(95%C.I.=17.60-Inf)	2075.para.1	PPP2R5E;PPP2R5A;PPP2R5B;PPP2R5C;PPP2R5D
	11	64695357	T	PPP2R5B	+	ENST00000164133	160	P	Family-wise	PER1	adj-p=3.03e-04;logp=-3.52;OR=78.88(95%C.I.=17.60-Inf)	2075.para.1	PPP2R5E;PPP2R5A;PPP2R5B;PPP2R5C;PPP2R5D
	11	64695358	T	PPP2R5B	+	ENST00000164133	161	S	Family-wise	PER1	adj-p=3.03e-04;logp=-3.52;OR=78.88(95%C.I.=17.60-Inf)	2075.para.1	PPP2R5E;PPP2R5A;PPP2R5B;PPP2R5C;PPP2R5D
	11	64695359	C	PPP2R5B	+	ENST00000164133	161	S	Family-wise	PER1	adj-p=3.03e-04;logp=-3.52;OR=78.88(95%C.I.=17.60-Inf)	2075.para.1	PPP2R5E;PPP2R5A;PPP2R5B;PPP2R5C;PPP2R5D
	11	64695360	G	PPP2R5B	+	ENST00000164133	161	S	Family-wise	PER1	adj-p=3.03e-04;logp=-3.52;OR=78.88(95%C.I.=17.60-Inf)	2075.para.1	PPP2R5E;PPP2R5A;PPP2R5B;PPP2R5C;PPP2R5D
	1	22925421	G	EPHA8	+	ENST00000166244	757	V	Family-wise	PER1	adj-p=1.13e-02;logp=-1.95;OR=24.02(95%C.I.=7.49-Inf)	1025.para.1	EPHA3;EPHA5;EPHA4;EPHA7;EPHA6;EPHA8;EPHB2;EPHB1;EPHB3;EPHB4;EPHA10;EPHA2;EPHA1;EPHB6
	1	22925422	T	EPHA8	+	ENST00000166244	757	V	Family-wise	PER1	adj-p=1.13e-02;logp=-1.95;OR=24.02(95%C.I.=7.49-Inf)	1025.para.1	EPHA3;EPHA5;EPHA4;EPHA7;EPHA6;EPHA8;EPHB2;EPHB1;EPHB3;EPHB4;EPHA10;EPHA2;EPHA1;EPHB6
	1	22925423	C	EPHA8	+	ENST00000166244	757	V	Family-wise	PER1	adj-p=1.13e-02;logp=-1.95;OR=24.02(95%C.I.=7.49-Inf)	1025.para.1	EPHA3;EPHA5;EPHA4;EPHA7;EPHA6;EPHA8;EPHB2;EPHB1;EPHB3;EPHB4;EPHA10;EPHA2;EPHA1;EPHB6
	1	22925424	C	EPHA8	+	ENST00000166244	758	H	Family-wise	PER1	adj-p=1.13e-02;logp=-1.95;OR=24.02(95%C.I.=7.49-Inf)	1025.para.1	EPHA3;EPHA5;EPHA4;EPHA7;EPHA6;EPHA8;EPHB2;EPHB1;EPHB3;EPHB4;EPHA10;EPHA2;EPHA1;EPHB6
	1	22925425	A	EPHA8	+	ENST00000166244	758	H	Family-wise	PER1	adj-p=1.13e-02;logp=-1.95;OR=24.02(95%C.I.=7.49-Inf)	1025.para.1	EPHA3;EPHA5;EPHA4;EPHA7;EPHA6;EPHA8;EPHB2;EPHB1;EPHB3;EPHB4;EPHA10;EPHA2;EPHA1;EPHB6
	1	22925426	C	EPHA8	+	ENST00000166244	758	H	Family-wise	PER1	adj-p=1.13e-02;logp=-1.95;OR=24.02(95%C.I.=7.49-Inf)	1025.para.1	EPHA3;EPHA5;EPHA4;EPHA7;EPHA6;EPHA8;EPHB2;EPHB1;EPHB3;EPHB4;EPHA10;EPHA2;EPHA1;EPHB6
	1	22925427	C	EPHA8	+	ENST00000166244	759	R	Family-wise	PER1	adj-p=1.13e-02;logp=-1.95;OR=24.02(95%C.I.=7.49-Inf)	1025.para.1	EPHA3;EPHA5;EPHA4;EPHA7;EPHA6;EPHA8;EPHB2;EPHB1;EPHB3;EPHB4;EPHA10;EPHA2;EPHA1;EPHB6
	1	22925428	G	EPHA8	+	ENST00000166244	759	R	Family-wise	PER1	adj-p=1.13e-02;logp=-1.95;OR=24.02(95%C.I.=7.49-Inf)	1025.para.1	EPHA3;EPHA5;EPHA4;EPHA7;EPHA6;EPHA8;EPHB2;EPHB1;EPHB3;EPHB4;EPHA10;EPHA2;EPHA1;EPHB6
	1	22925429	A	EPHA8	+	ENST00000166244	759	R	Family-wise	PER1	adj-p=1.13e-02;logp=-1.95;OR=24.02(95%C.I.=7.49-Inf)	1025.para.1	EPHA3;EPHA5;EPHA4;EPHA7;EPHA6;EPHA8;EPHB2;EPHB1;EPHB3;EPHB4;EPHA10;EPHA2;EPHA1;EPHB6
	1	22925430	G	EPHA8	+	ENST00000166244	760	D	Family-wise	PER1	adj-p=1.13e-02;logp=-1.95;OR=24.02(95%C.I.=7.49-Inf)	1025.para.1	EPHA3;EPHA5;EPHA4;EPHA7;EPHA6;EPHA8;EPHB2;EPHB1;EPHB3;EPHB4;EPHA10;EPHA2;EPHA1;EPHB6
	1	22925431	A	EPHA8	+	ENST00000166244	760	D	Family-wise	PER1	adj-p=1.13e-02;logp=-1.95;OR=24.02(95%C.I.=7.49-Inf)	1025.para.1	EPHA3;EPHA5;EPHA4;EPHA7;EPHA6;EPHA8;EPHB2;EPHB1;EPHB3;EPHB4;EPHA10;EPHA2;EPHA1;EPHB6
	1	22925432	C	EPHA8	+	ENST00000166244	760	D	Family-wise	PER1	adj-p=1.13e-02;logp=-1.95;OR=24.02(95%C.I.=7.49-Inf)	1025.para.1	EPHA3;EPHA5;EPHA4;EPHA7;EPHA6;EPHA8;EPHB2;EPHB1;EPHB3;EPHB4;EPHA10;EPHA2;EPHA1;EPHB6
	1	22925433	C	EPHA8	+	ENST00000166244	761	L	Family-wise	PER1	adj-p=1.13e-02;logp=-1.95;OR=24.02(95%C.I.=7.49-Inf)	1025.para.1	EPHA3;EPHA5;EPHA4;EPHA7;EPHA6;EPHA8;EPHB2;EPHB1;EPHB3;EPHB4;EPHA10;EPHA2;EPHA1;EPHB6
	1	22925434	T	EPHA8	+	ENST00000166244	761	L	Family-wise	PER1	adj-p=1.13e-02;logp=-1.95;OR=24.02(95%C.I.=7.49-Inf)	1025.para.1	EPHA3;EPHA5;EPHA4;EPHA7;EPHA6;EPHA8;EPHB2;EPHB1;EPHB3;EPHB4;EPHA10;EPHA2;EPHA1;EPHB6
	1	22925435	G	EPHA8	+	ENST00000166244	761	L	Family-wise	PER1	adj-p=1.13e-02;logp=-1.95;OR=24.02(95%C.I.=7.49-Inf)	1025.para.1	EPHA3;EPHA5;EPHA4;EPHA7;EPHA6;EPHA8;EPHB2;EPHB1;EPHB3;EPHB4;EPHA10;EPHA2;EPHA1;EPHB6
	1	22925436	G	EPHA8	+	ENST00000166244	762	A	Family-wise	PER1	adj-p=1.13e-02;logp=-1.95;OR=24.02(95%C.I.=7.49-Inf)	1025.para.1	EPHA3;EPHA5;EPHA4;EPHA7;EPHA6;EPHA8;EPHB2;EPHB1;EPHB3;EPHB4;EPHA10;EPHA2;EPHA1;EPHB6
	1	22925437	C	EPHA8	+	ENST00000166244	762	A	Family-wise	PER1	adj-p=1.13e-02;logp=-1.95;OR=24.02(95%C.I.=7.49-Inf)	1025.para.1	EPHA3;EPHA5;EPHA4;EPHA7;EPHA6;EPHA8;EPHB2;EPHB1;EPHB3;EPHB4;EPHA10;EPHA2;EPHA1;EPHB6
	1	22925438	C	EPHA8	+	ENST00000166244	762	A	Family-wise	PER1	adj-p=1.13e-02;logp=-1.95;OR=24.02(95%C.I.=7.49-Inf)	1025.para.1	EPHA3;EPHA5;EPHA4;EPHA7;EPHA6;EPHA8;EPHB2;EPHB1;EPHB3;EPHB4;EPHA10;EPHA2;EPHA1;EPHB6
	1	22925439	G	EPHA8	+	ENST00000166244	763	A	Family-wise	PER1	adj-p=1.13e-02;logp=-1.95;OR=24.02(95%C.I.=7.49-Inf)	1025.para.1	EPHA3;EPHA5;EPHA4;EPHA7;EPHA6;EPHA8;EPHB2;EPHB1;EPHB3;EPHB4;EPHA10;EPHA2;EPHA1;EPHB6
	1	22925440	C	EPHA8	+	ENST00000166244	763	A	Family-wise	PER1	adj-p=1.13e-02;logp=-1.95;OR=24.02(95%C.I.=7.49-Inf)	1025.para.1	EPHA3;EPHA5;EPHA4;EPHA7;EPHA6;EPHA8;EPHB2;EPHB1;EPHB3;EPHB4;EPHA10;EPHA2;EPHA1;EPHB6
	1	22925441	C	EPHA8	+	ENST00000166244	763	A	Family-wise	PER1	adj-p=1.13e-02;logp=-1.95;OR=24.02(95%C.I.=7.49-Inf)	1025.para.1	EPHA3;EPHA5;EPHA4;EPHA7;EPHA6;EPHA8;EPHB2;EPHB1;EPHB3;EPHB4;EPHA10;EPHA2;EPHA1;EPHB6
[truncated: 119,421 more rows]

## Sheet: 4) GW PERs in BED format
	Chr	Pos	Ref	Gene	Orientation	Transcript	Codon	AA	Approach	PER	Stats
[truncated: 8,274 more rows]

[truncated: 1 more sheets: 5) Genes with FW and GW PERs]
