# Supplementary figures and images for: Identification of pathogenic variant enriched regions across genes and gene families
Source: HighWire-hosted journal article supplement (doi:10.1101/gr.252601.119), 2019-12-23

## Missense burden analysis: ./Glutamate-receptors

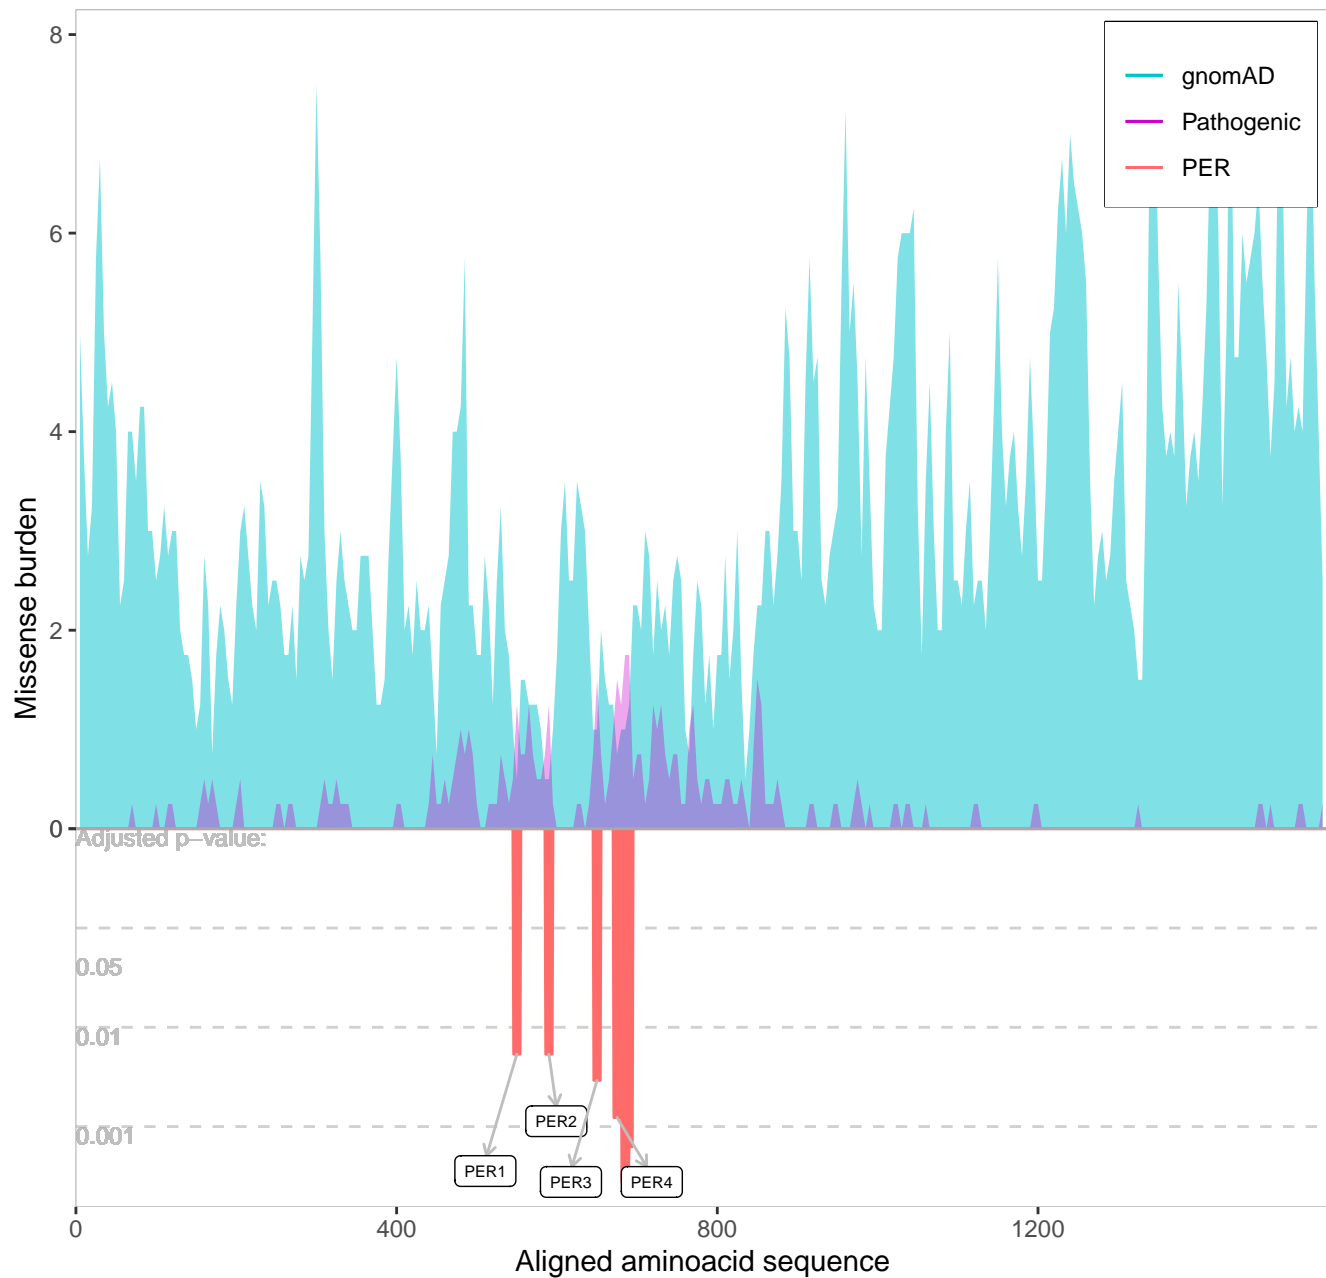

Supplement: Supplemental_Code.7.zip [file Glutamate-receptors.bin9.stats.pdf › Supplemental_Code/Example-output/Glutamate-receptors.bin9.stats.pdf]

# Missense burden analysis: ./SOX9

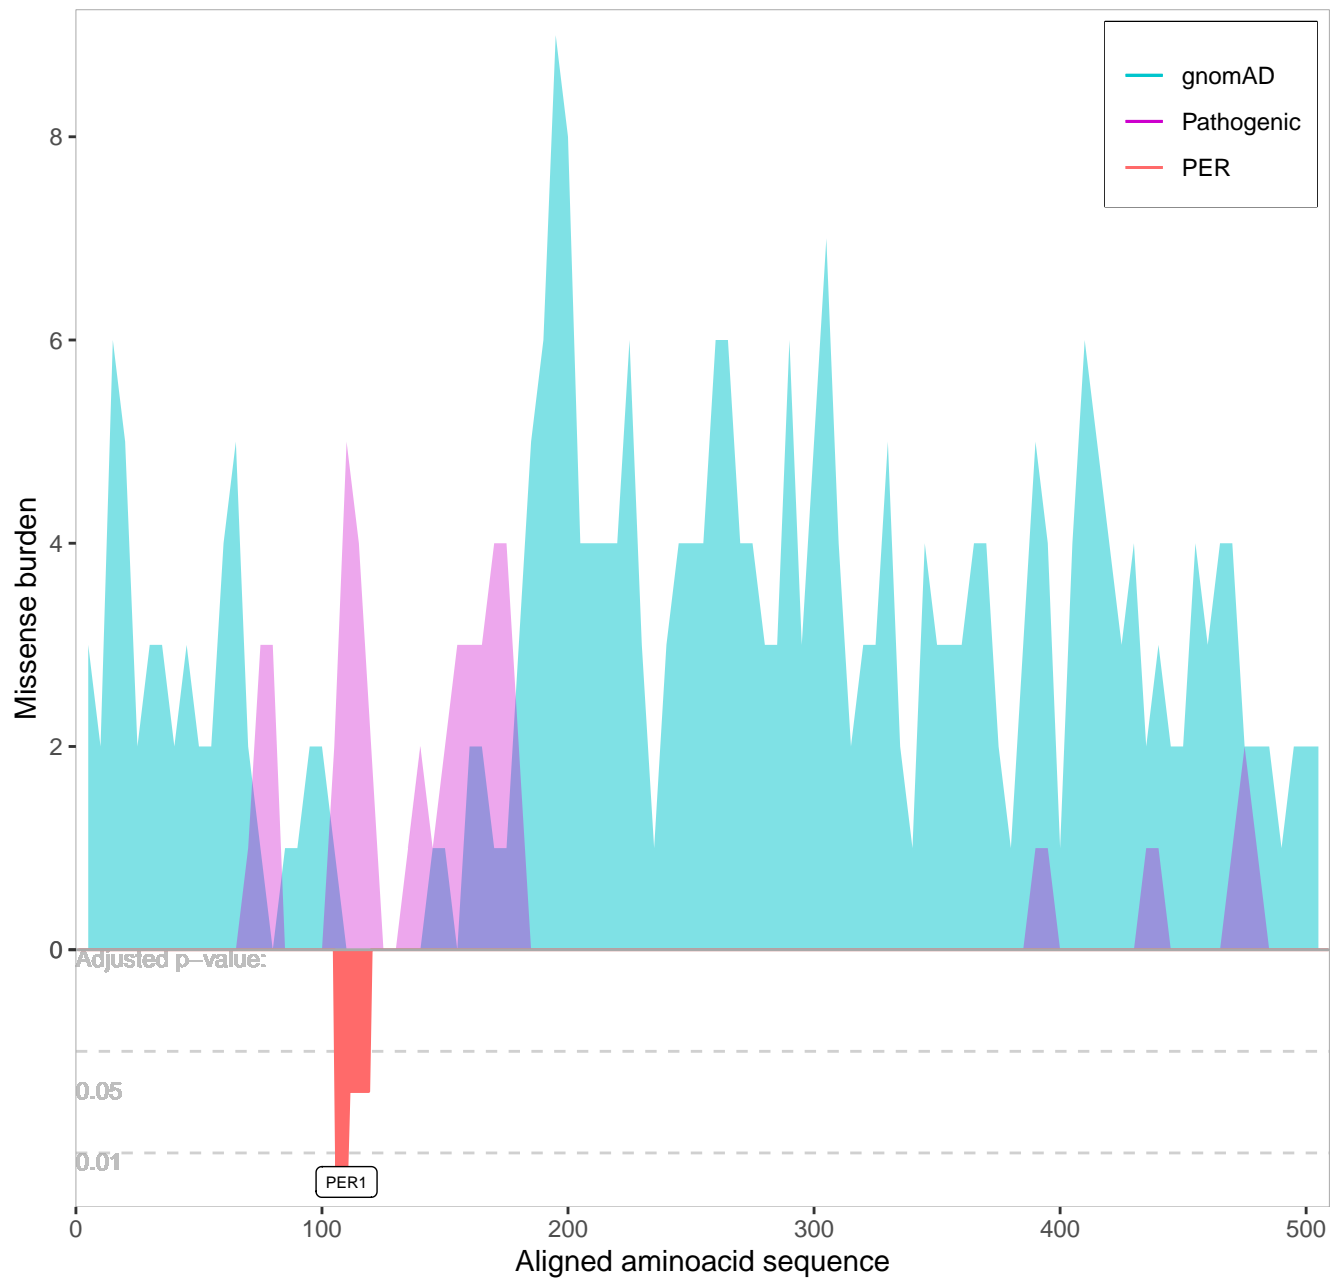

Supplement: Supplemental_Code.7.zip [file SOX9.bin9.stats.pdf › Supplemental_Code/Example-output/SOX9.bin9.stats.pdf]

# Missense burden analysis: .Voltage-gated-sodium-channels

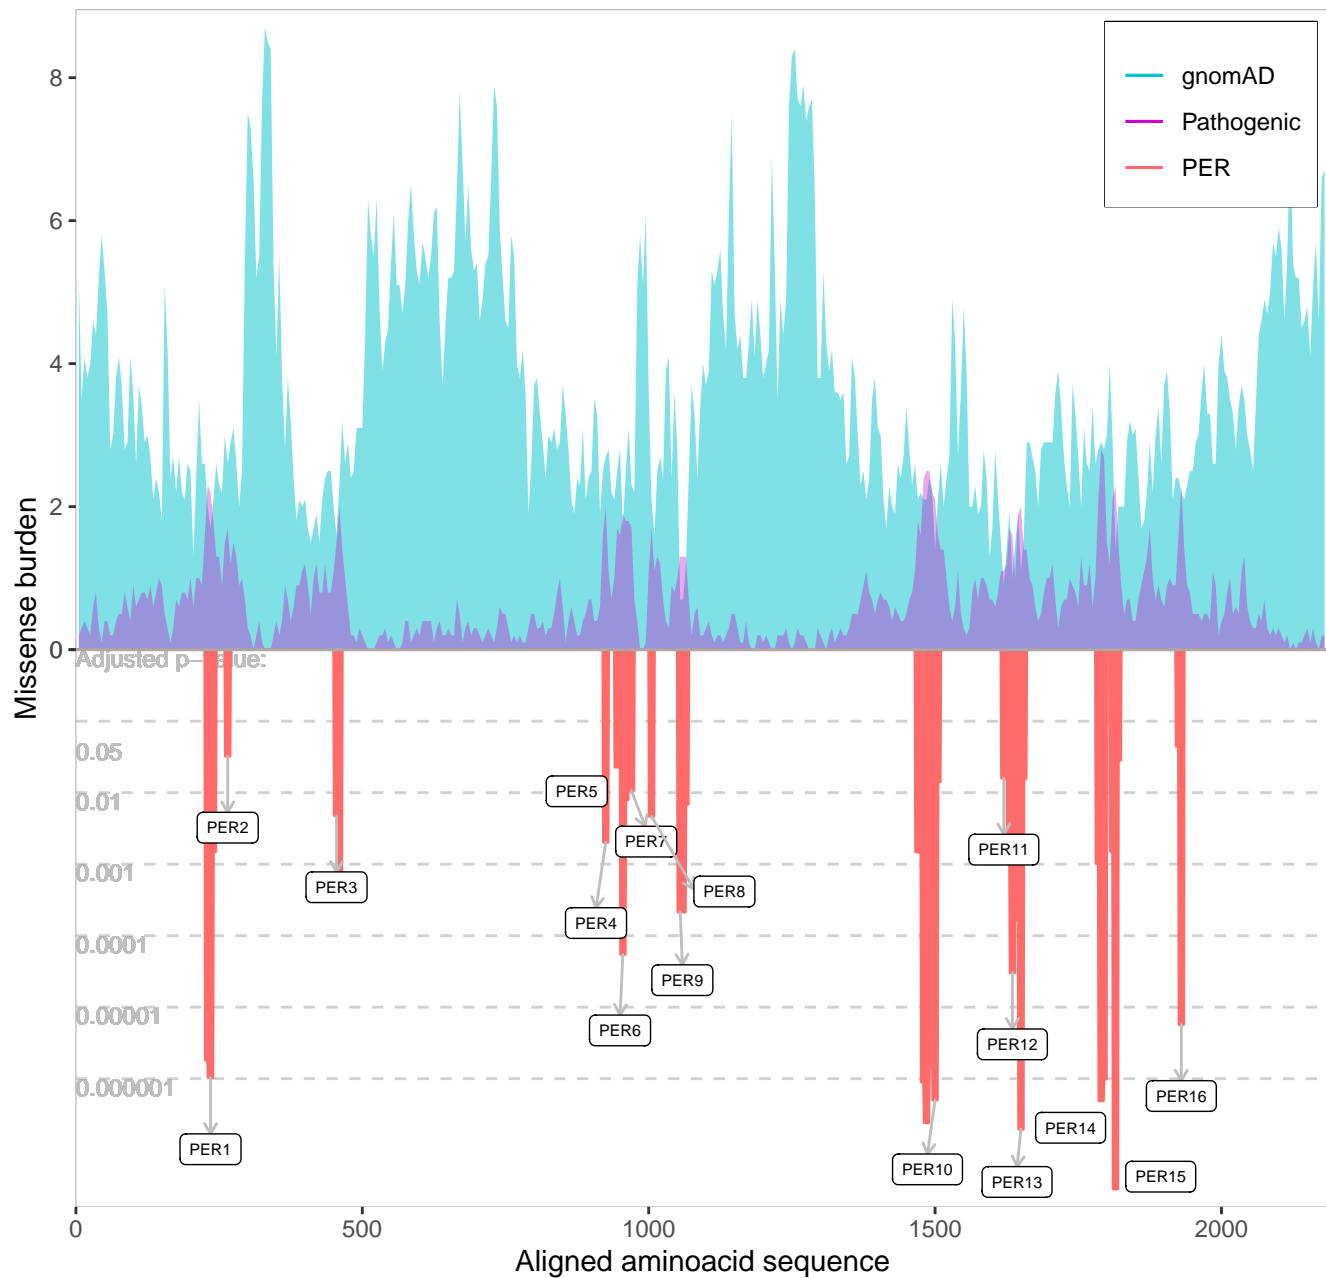

Supplement: Supplemental_Code.7.zip [file Voltage-gated-sodium-channels.bin9.stats.pdf › Supplemental_Code/Example-output/Voltage-gated-sodium-channels.bin9.stats.pdf]
